# Supplementary material for: MicroRNA and Putative Target Discoveries in Chrysanthemum Polyploidy Breeding
Source: Int J Genomics. 2017 Dec 13;2017:6790478. doi: 10.1155/2017/6790478 (PMC5745731; doi:10.1155/2017/6790478)
Supplement: Supplementary 1 — Table S1: primers used to verify the expression of miRNAs and target genes. [file 6790478.f1.xlsx]

## Sheet: miRNAs
Name	Sequence (5'-3')
miR169b	CAGCCAAGGATGACTTGCCGG
miR858b	TTCGTTGTCTGTTCGACCTTG
miR1520g	CAACTCAGAACTGGTACGGACAA
miR159a	TTTGGATTGAAGGGAGCTCTA
miR396a-3p	ACAGTTCAATAAAGCTGTGGGAAG
miR5021	ATTGTAGAAGAAGAAGAAGAAGAA
miR167c-3p	GGTCATGCGGACAGCTTCACT
miR414	TACATCATCATCATTATCGTC
miR5380a	AAAATATGATGAGGATGGTGA
miR5030	AGCAGGAATTTGTGTTTTACCCGG
miR5270a	GTAGGAGTAGTAGTTTTGGCAT
miR5049c	AGTGACAATAATTTTGAGACGGAG

## Sheet: Target genes
Name	Forward sequence (5'-3')	Reverse sequence (5'-3')
CL13854.Contig1_All	TATTTCGTGGGCAAGGCAG	ATTGTAGGACGTTTGGCAGGT
Unigene2183_All	ATGGTCGCTTATTGCTGGG	TCTGTCTCGTTCTCACATTCCTT
CL4864.Contig1_All	GTCGAGATGAGTACTCCTTAGTTGA	GACTTGAAGAGACGGGCACA
CL936.Contig4_All	GCTCACATGCCAAACAAGCT	AGCTTCCTCATGCGTATCCG
CL5368.Contig4_All	CTCCTCCCATCCTCAGTCCA	TTGCATGGGGAGGCTAAGTG
Unigene31007_All	ATGCTCCAGGCCTCTCAAAC	CCTGGAGGTCCATCGCTTAA
Unigene21756_All	ATCTATCTGCTGATTTTGAGGCTAC	GAACAAGAAGAACCTTTATACCGC
Unigene11631_All	GCCGGCTATGGGTCTTCTAC	CCTGGTGCTAGCCTCAGTTC
Unigene25838_All	TGCTGCTAATAATGGCGATCAA	TGAACGCAAATCTTGGTTCCC
