# Supplementary material for: MicroRNA and Putative Target Discoveries in Chrysanthemum Polyploidy Breeding
Source: Int J Genomics. 2017 Dec 13;2017:6790478. doi: 10.1155/2017/6790478 (PMC5745731; doi:10.1155/2017/6790478)
Supplement: Supplementary 2 — Table S2: expression level of miRNAs identified in chrysanthemum embryo. [file 6790478.f2.xlsx]

## Sheet: Sheet1
	Expression level
miR-name	NE12	NE18	AE18	Sequence
miR166a	8971.4	6936.92	6749.06	TCGGACCAGGCTTCATTCCCC
miR398b-5p	0.01	0.01	3524.3	GGGGACGGACTGGGAACGGAT
miR157a	3211.9	3192.44	3245.53	TTGACAGAAGATAGAGAGCAC
miR156a	1775	2703.6	1900.24	TGACAGAAGAGAGTGAGCAC
miR167a	723.957	1153.33	766.977	TGAAGCTGCCAGCATGATCTA
miR2199	282.613	345.573	537.134	TGATAACTCGACGGATCGC
miR1520g	286.774	439.88	500.594	CAACTCAGAACTGGTACGGACAA
miR5632	434.842	508.55	496.583	TTGGGATCAATAAGTTGGATAAG
miR2592ap	248.543	309.757	317.539	AGAGCTGTTAAGATGAATGGTA
miR168a	314.168	267.463	317.45	TCGCTTGGTGCAGGTCGGGAA
miR6300	97.1807	145.115	261.036	GTCGTTGTAGTATAGTGGT
miR5235a	387.162	238.958	233.052	ACTAAGGATCATGTTGGCGTG
miR2916	92.9328	104.116	198.384	TGGGGGCTCGAAGACGATCAG
miR5565e	180.317	245.344	190.274	TTGTTTGAAATAGTTGTCGTA
miR5274b-5p	136.712	114.574	134.127	TTATGAGGAGTGTAAGATGGC
miR6220-3p	175.376	150.945	126.106	ATGGACTTATAATTTGGGACGGAG
miR419	101.775	103.931	106.322	TTGAAGAAGCTGAGGATGTTA
miR1516d	91.8058	103.376	102.757	GTACTTGTCGGGCTTGGTATCCCA
miR159a	53.5751	29.9855	101.509	TTTGGATTGAAGGGAGCTCTA
miR5490	136.452	106.337	96.34	TGGACATTTATTTAGGGACGG
miR894	51.061	97.5453	78.1593	CGTTTCACGTCAGGTTCACCA
miR2948-5p	86.1709	63.3952	75.4857	ATGTGGCGACACGTTGGGCAAGAA
miR5205a	48.2002	41.6465	68.7124	ACAATTATTATGGGACGGAGGGAG
miR6189	71.0867	79.9613	67.1974	TAGGTGATGCTTTGATGATCGT
miR1320-3p	68.1392	0.01	67.1083	TGTACAAAATGATCGTTCCAA
miR5636	80.2759	73.3904	64.0781	GTAGTTGCACTGAGCTTGACGGTC
miR396f	44.0391	56.0839	64.0781	TTCCACGGCTTTCTTGAACTG
miR774b-5p	60.6837	66.5418	59.6221	TGAGATGAAGATATGATGGTG
miR5239	36.4969	37.3893	59.2656	TGGTGGGAAAAGATAGATTGG
miR390a	59.7301	57.7498	55.0769	AAGCTCAGGAGGGATAGCGCC
miR5072	20.7192	49.328	53.9183	GTTCGTTCCCCAGCAGAGTCGCCA
miR5021	30.6886	27.9494	50.5317	ATTGTAGAAGAAGAAGAAGAAGAA
miR827	52.3614	50.5311	48.3928	TTGAGATGGCCATCAAGAACTA
miR5791	52.7082	42.572	47.1451	TTGCAGGAGACTTGAAGAACCA
miR164c	35.9768	31.096	46.6104	TGGAGAAGCAGGGTACGTGCA
miR535a	0.01	0.01	43.7585	TGACAACGAGAGAGAGCACGC
miR5576	40.0513	37.9446	41.887	AGAAGTTGGCAACTGCAACAT
miR4387e	56.956	43.6825	41.7087	TGATTCTTGTAAGGCGTGATG
miR440	38.8376	40.2583	41.4414	AGAGTTCTTGATGATCGGGCATA
miR396a-3p	25.9206	23.0444	38.6786	ACAGTTCAATAAAGCTGTGGGAAG
miR5242	36.4102	49.6056	35.292	TTGTAGAAACAAGATATGCTC
miR1150.2	23.84	28.3196	31.3707	TCGACAAGAGAGGAACATTGAT
miR4343a	33.8095	29.7078	31.2815	AAAAAACTGTACTGCATCGTTGAT
miR1436	21.6728	43.0347	30.4795	ACATTATGTAGGACGGGGGAGG
miR5077	22.8864	47.2919	29.1426	TTCACGTCAGGTTCACCA
miR4357	25.1404	21.8413	28.697	AGTACGTGTGATTGTAGGGCAT
miR171b	24.1868	25.6357	28.0732	TGATTGAGCCGTGCCAATATC
miR528-5p	0.01	13.8822	27.6276	TGGAAGGGGCATGCAGAGGAG
miR780.2	0.01	0.01	23.528	TTGTTCGTGAATCTGGCATA
miR5049c	40.0513	46.459	21.4782	AGTGACAATAATTTTGAGACGGAG
miR479	18.8986	19.3425	21.3891	CGATGATATTTGTGGTCGGCTCAC
miR4403	27.5678	27.6718	19.6067	AGGACCGACCGGACCGACACGGAC
miR5522	0.01	0.01	18.8046	TACAATGGAATGGGACGCATG
miR6025b	21.2393	20.9158	18.5372	TGCGAACATATATGAAGATGACAT
miR2653a	15.7778	13.1418	18.359	TCTGGCTGCTGTGAAATGGAT
miR5641	13.4371	25.7283	18.0025	TTGGAAGAAGAAGATGAGAATA
miR812v	0.01	0.01	17.2004	ATGTGGACTATAAATATGGGACGG
miR4364b	20.4591	18.2319	16.8439	AACAACAGGGACGACACCTCTT
miR162a	14.4774	12.9567	16.6657	TCGATAAACCTCTGCATCCAG
miR408b-5p	0.01	1.7584	16.4874	TCAGGGACGAGGCAGAGCATG
miR5139	11.8767	32.1141	15.1506	CGTAACCTGGCTCTGATACCA
miR4380b	16.2112	15.1778	14.8832	TATGGTCTACGGTATTTTCAT
miR6455	15.7778	14.6225	14.5268	TCATATAGCATCTCAGACATTC
miR5767	16.9048	11.1983	14.3485	TGAGGAACGTTGAAAGGTGCA
miR4250	14.5641	18.6021	14.1703	TCTCACAGGCACAGAACATCAA
miR5020a	13.8706	12.9567	13.992	TGAAAAAGGTAGTAGACTTGCA
miR5774a	15.7778	12.9567	12.2987	GCTAGGCTCGACACTGATAGGCAT
miR5248	12.917	11.3834	12.0314	TTTTTAGTTGGATGGCTATTTA
miR2643a	7.6288	10.3653	11.8531	TTTGGGACATGAAATTAGAGG
miR3520-5p	12.0501	7.774	11.8531	ATGATGACTGGTAATATCTTATCT
miR1310	7.5421	9.625	11.6749	GAGGCATCGGGGGCGCAACGC
miR5245	10.5763	10.7355	11.4966	CACATCGTAGAACACAGGGTA
miR6478	6.4151	10.4579	10.7837	CCGACCTTAGCTCAGTTGGTAG
miR1023b-3p	9.536	11.4759	10.4272	AAGTATTGAAGACGAGTGCAG
miR5815	13.6972	11.661	10.2489	AAGTATGGACACTAGAAGACAA
miR2628	6.3284	0.01	9.4468	TATGAATAGAATGATGTGTAAG
miR5793	12.0501	13.0492	8.6448	CAGGACGAGCTACAGCGACAG
miR397a	7.3687	4.905	8.0209	TCATTGAGTGCAGCGTTGATG
miR6182	6.8486	4.2572	7.6644	TGAGTGTTGTGATGACGGATTT
miR835-3p	9.9695	5.5529	7.4862	TGGAGAAGATAATGCAGACAG
miR1318-5p	0.01	0.01	7.4862	TCAGGAGAGATGACACCGACA
miR5257	6.2418	6.0156	7.3971	ACAAGTAGACTTATTTTTCTT
miR5997	0.01	0.01	7.2188	TGAAACCAAGTAGGCCAAAGAG
miR477a	5.3748	5.5529	6.8623	CCTCTCCCTCAAGGGCTTCTG
miR5519	11.79	5.9231	6.6841	TAGCAGAAGACATGGTACTTAG
miR6111-5p	6.5885	8.2368	6.595	TCTTGATGTCACGGTGTATGAC
miR5380a	4.3346	3.3317	6.5058	AAAATATGATGAGGATGGTGA
miR5298b	0.01	0.01	6.1494	TGACTTGGATGATGATGAAGATGA
miR1888b	4.4212	5.5529	5.9711	TTCGTGACTAAGTTTGTGAAGA
miR474b	3.7277	4.5348	5.7929	CAAAAGTTGTTGGTGTGTTGGG
miR3447-5p	0.01	0.01	5.5255	CGGACGAACATATTAAAACGG
miR168a-3p	4.9414	4.6274	5.4364	CCCGCCTTGCATCAACTGAAT
miR6114-5p	0.01	3.9796	5.4364	TGAAAGGAAGGATGACGATGA
miR860-3p	0.01	4.9976	5.2582	TCAATAGATTGGATCGTATCAAAT
miR169b	0.01	0.01	4.9908	CAGCCAAGGATGACTTGCCGG
miR4366	0.01	0.01	4.9908	CTTAATTTGTAGAGTTTGTTGG
miR447	4.4212	3.9796	4.9017	CCTCTCCCTCAAGGGCTTCTGAC
miR165a	11.4432	16.5661	4.8125	TCGGACCAGGCTTCATCCCCC
miR395k-3p	3.641	3.7019	4.8125	TGAGGTGTTTGACGGAAATCTC
miR5503	0.01	0.01	4.8125	TCTGATCTTTGTAGAGGCATGT
miR2868	0.01	0.01	4.7234	TGTGAGTTTTTTGTAGTAGATA
miR6429	4.5946	3.9796	4.4561	TAGGGGAAGATGCATTGACTG
miR5056	0.01	3.9796	4.4561	AGGAAGAACTGGTAATAGACGCAA
miR403	3.2943	3.0541	4.4561	TTAGATTCACGCACAAACTCG
miR447b-3p	0.01	7.0336	4.0996	GAGGTCTTTGGGGAGAGATGG
miR4342	5.8083	3.6094	4.0996	AATCTTGATTAAATGTAGGACGGT
miR2627	3.2943	4.4423	4.0105	TTTCGTCGTTAACTGCTAACGG
miR1528	5.4615	4.3497	4.0105	AAGATTAGACTCAATATTTTAGCT
miR5524	4.768	4.1646	4.0105	TGGAAAATTGTTGCATGTACGC
miR5761a	2.9475	4.0721	3.9213	TTTGTGTCGTGAATGATTTTA
miR6449	4.5946	5.5529	3.654	TCAGATTATGAATGACGGTTT
miR858b	0.7802	0.9255	3.1192	TTCGTTGTCTGTTCGACCTTG
miR167c-3p	2.8608	4.3497	3.0301	GGTCATGCGGACAGCTTCACT
miR1507a	3.1209	2.7764	2.7628	ATGTTCATTCCATTACATCGTCGA
miR5373	1.3004	2.2211	2.6736	TCTTGTTGTTCTAGATGATGT
miR5658	5.6349	3.1466	2.5845	ATATGACTTGGATGATGATGAAGA
miR319a	2.4273	2.4988	2.4954	TTGGACTGAAGGGAGCTCCCT
miR5776	0.01	0.01	2.4063	CCACTTGGGCTGATCTTAGGG
miR845b	3.0342	0.01	2.228	ATCGCTCTGATACCAGAATAGATG
miR5225a	0.01	0.01	2.228	TTGTCGCAGGAAAGATGACACT
miR3434-3p	5.8083	4.0721	2.0498	TCCGAATCAGAAATCAGACCA
miR1432	2.514	2.0361	2.0498	TCGCAGGCAAGATGACACCGA
miR5744	1.3004	0.9255	1.9607	TAGGTATTTTTAGGACATCGT
miR5231	1.4737	0.01	1.9607	TTGTGCAAGTGGATCAAGTCA
miR5640	0.01	0.01	1.8715	TGAAGAGAAGGAAGAAGATTA
miR156f-3p	2.6007	0.01	1.6933	GCTCACTCTCTATCTGTCACC
miR390a-3p	2.7741	2.0361	1.4259	CGCTATCTATCCTGAGCCTCA
miR1052	0.01	0.01	1.3368	ATGCCTTTTCTTGATTGTTGGTA
miR5751	0.01	2.2211	1.2477	TTGTTTGATCATAATGGATTTT
miR5650	0.01	0.01	1.1586	TTGTTTTGGAACTTAAGATAC
miR2610a	1.3871	0.01	1.0695	AGTTGAGACTTTTATGGCATC
miR5207	0.01	0.01	1.0695	ATTAATGTGGACTGTGGACGGTAT
miR5721	0.01	222.948	0.01	AAATATGGAGTAGAAGATGA
miR172c	0.01	57.0094	0.01	AGAATCTTGATGATGCTGCAG
miR845b-5p	0.01	47.9397	0.01	CAGATTGGTATCAGAGCATCGG
miR5030	28.0012	28.9675	0.01	AGCAGGAATTTGTGTTTTACCCGG
miR5534b	0.01	27.8569	0.01	CGATGAGCAGCAACAGAATGG
miR818a	0.01	23.9699	0.01	AAGTGGACTTATATTATGGGACGG
miR5270a	27.9145	19.2499	0.01	GTAGGAGTAGTAGTTTTGGCAT
miR5293	0.01	14.6225	0.01	AGAAGAAGAAGTAGAAGAAGAAGA
miR2929	0.01	10.4579	0.01	TCAAGGGAGTTTGTTGACATA
miR5154	9.536	8.0517	0.01	AGACAAGCTGACGTGACGCTGAGT
miR5675	0.01	7.9591	0.01	TGAGATGACAACAGCTGGAAA
miR169g	5.4615	6.9411	0.01	TAGCCAGGGATGACTTGCC
miR156l-3p	0.01	6.8485	0.01	GCTCACGCTCTATCTGTCACC
miR535b	2.8608	4.905	0.01	TGACAAGGAGAGAGAGCACGC
miR1215	3.2943	4.8125	0.01	TCATTGCAACACTGATAACGG
miR6177	0.01	3.9796	0.01	TCCAGTGGACAGAAAGCACTAA
miR160a	0.5201	2.869	0.01	TGCCTGGCTCCCTGTATGCCA
miR5227	0.01	2.869	0.01	TTGAATAGAAGAGATTGATGTA
miR5817	3.5543	2.6839	0.01	ATGGAATTGAAAGAAAACGGTCAT
miR5794	2.1673	2.4988	0.01	TGATGAATCAATAGATAGTCGT
miR1513d	0.01	2.1286	0.01	TAAGGCATGACTTACATCACC
miR393a	0.01	1.851	0.01	TCCAAAGGGATCGCATTGATCC
miR812g	1.0403	1.6659	0.01	AGAAGAAGGATGTTAAAGTTGGAC
miR1507-3p	0.01	1.2957	0.01	CTTCGTTCCATACATCATCTAT
miR5662	175.376	0.01	0.01	AGAGGTGTCGATGTGGAGATG
miR5492	45.7729	0.01	0.01	AGAAGGATAATAGAACGGCTT
miR4407	15.6044	0.01	0.01	CAGAAGAAGCAGCGACTGTACGGC
miR5255	9.7094	0.01	0.01	TGACTTGGTAGACACATGGGA
miR414	6.4151	0.01	0.01	TACATCATCATCATTATCGTC
miR1441	6.0684	0.01	0.01	ACCGGATGTAGGAAGTAACGGTTT
miR6209	5.9817	0.01	0.01	TGAGTATAAGAAAGATGATGG
miR5770a	5.4615	0.01	0.01	TTCAGGCAAAGGTTTGGACGA
miR2950-3p	4.2479	0.01	0.01	TGGTTGTTACACGGATGGAATA
miR5777	3.641	0.01	0.01	TTAGGGCAATAATGTTTGGATCAC
miR2661	3.381	0.01	0.01	ATAGGTTTGAGAGAATGGCAA
miR1875	1.8205	0.01	0.01	ACAATGGAAATGAATGCAACAAAA
miR1510b-5p	1.7338	0.01	0.01	AGGGATAGGCAAAACAACTCT
miR5215	1.5604	0.01	0.01	AGATGGATGAGCACACTGCTT
