# Supplementary material for: MicroRNA and Putative Target Discoveries in Chrysanthemum Polyploidy Breeding
Source: Int J Genomics. 2017 Dec 13;2017:6790478. doi: 10.1155/2017/6790478 (PMC5745731; doi:10.1155/2017/6790478)
Supplement: Supplementary 3 — Table S3: all identified target genes in chrysanthemum embryo. [file 6790478.f3.xlsx]

## Sheet: Sheet1
miRNA	No. of target genes	ID of target genes
miR166a	4	CL1999.Contig2_All
		CL1999.Contig3_All
		CL3193.Contig6_All
		Unigene33904_All
miR1150.2	1	Unigene5020_All
miR1318-5p	1	CL1789.Contig3_All
miR1320-3p	2	CL12239.Contig2_All
		Unigene26213_All
miR1436	5	CL2105.Contig4_All
		CL4124.Contig3_All
		CL4124.Contig4_All
		Unigene807_All
		Unigene36172_All
miR1507-3p	1	Unigene14372_All
miR1507a	2	CL10701.Contig1_All
		CL10701.Contig2_All
miR1510b-5p	4	CL9888.Contig2_All
		CL15989.Contig2_All
		Unigene24272_All
		Unigene43072_All
miR1513d	2	CL10082.Contig1_All
		CL12070.Contig1_All
miR156a	9	CL3254.Contig1_All
		CL3254.Contig2_All
		Unigene10412_All
		Unigene12975_All
		Unigene22174_All
		Unigene31451_All
		Unigene31625_All
		Unigene33249_All
		Unigene38296_All
miR157a	8	CL3254.Contig1_All
		CL3254.Contig2_All
		Unigene10412_All
		Unigene12975_All
		Unigene22174_All
		Unigene31451_All
		Unigene33249_All
		Unigene38296_All
miR159a	5	CL2317.Contig2_All
		CL2979.Contig2_All
		Unigene13056_All
		Unigene17378_All
		Unigene43321_All
miR160a	5	CL8743.Contig2_All
		CL10783.Contig2_All
		Unigene2243_All
		Unigene9514_All
		Unigene15997_All
miR164c	1	Unigene24220_All
miR165a	2	CL1999.Contig2_All
		CL1999.Contig3_All
miR167a	3	CL6525.Contig1_All
		CL6525.Contig3_All
		Unigene32878_All
miR167c-3p	1	CL15007.Contig2_All
miR169b	3	CL3042.Contig2_All
		CL3042.Contig3_All
		Unigene26767_All
miR169g	3	CL3042.Contig2_All
		CL3042.Contig3_All
		Unigene30009_All
miR171b	1	CL10585.Contig2_All
miR172c	11	CL68.Contig1_All
		CL68.Contig2_All
		CL68.Contig3_All
		CL68.Contig4_All
		CL68.Contig5_All
		CL68.Contig6_All
		CL2372.Contig2_All
		Unigene7883_All
		Unigene14493_All
		Unigene23005_All
		Unigene47996_All
miR2653a	6	CL11075.Contig1_All
		CL12009.Contig1_All
		CL12009.Contig3_All
		CL12009.Contig4_All
		Unigene7445_All
		Unigene27509_All
miR2661	2	CL1807.Contig1_All
		Unigene35846_All
miR2868	2	CL15922.Contig2_All
		Unigene46_All
miR2916	1	Unigene33774_All
miR2929	6	CL6867.Contig1_All
		CL7024.Contig3_All
		CL12085.Contig1_All
		CL14966.Contig1_All
		CL14966.Contig2_All
		Unigene37169_All
miR2950-3p	3	CL12556.Contig1_All
		CL12556.Contig2_All
		Unigene29611_All
miR3434-3p	2	Unigene586_All
		Unigene43032_All
miR390a	1	Unigene2472_All
miR393a	2	Unigene31553_All
		Unigene37353_All
miR396a-3p	3	CL936.Contig1_All
		CL936.Contig2_All
		CL936.Contig4_All
miR397a	3	Unigene4252_All
		Unigene8193_All
		Unigene30076_All
miR403	1	CL516.Contig5_All
miR408b-5p	1	CL689.Contig1_All
miR414	347	CL31.Contig1_All
		CL31.Contig2_All
		CL33.Contig1_All
		CL83.Contig1_All
		CL83.Contig2_All
		CL105.Contig1_All
		CL154.Contig12_All
		CL154.Contig13_All
		CL564.Contig2_All
		CL842.Contig1_All
		CL934.Contig2_All
		CL1023.Contig2_All
		CL1050.Contig1_All
		CL1216.Contig1_All
		CL1216.Contig2_All
		CL1216.Contig3_All
		CL1402.Contig3_All
		CL1902.Contig2_All
		CL1908.Contig1_All
		CL2172.Contig7_All
		CL2176.Contig1_All
		CL2176.Contig2_All
		CL2250.Contig2_All
		CL2250.Contig3_All
		CL2328.Contig1_All
		CL2329.Contig2_All
		CL2486.Contig3_All
		CL2518.Contig4_All
		CL2586.Contig1_All
		CL2586.Contig2_All
		CL2586.Contig3_All
		CL2647.Contig3_All
		CL2674.Contig2_All
		CL2819.Contig1_All
		CL2824.Contig3_All
		CL2845.Contig1_All
		CL2845.Contig3_All
		CL2976.Contig1_All
		CL2976.Contig2_All
		CL2976.Contig3_All
		CL2982.Contig4_All
		CL3252.Contig2_All
		CL3863.Contig2_All
		CL3949.Contig2_All
		CL4274.Contig1_All
		CL4333.Contig1_All
		CL4333.Contig2_All
		CL4374.Contig1_All
		CL4374.Contig2_All
		CL4550.Contig3_All
		CL4645.Contig2_All
		CL4677.Contig1_All
		CL4677.Contig2_All
		CL4677.Contig3_All
		CL4677.Contig5_All
		CL4822.Contig2_All
		CL4890.Contig1_All
		CL4950.Contig2_All
		CL5017.Contig1_All
		CL5017.Contig2_All
		CL5042.Contig2_All
		CL5049.Contig3_All
		CL5207.Contig1_All
		CL5228.Contig1_All
		CL5228.Contig2_All
		CL5318.Contig2_All
		CL5354.Contig2_All
		CL5354.Contig3_All
		CL5368.Contig4_All
		CL5399.Contig2_All
		CL5528.Contig1_All
		CL5647.Contig1_All
		CL5647.Contig3_All
		CL5883.Contig1_All
		CL5912.Contig2_All
		CL6083.Contig2_All
		CL6226.Contig2_All
		CL6451.Contig6_All
		CL6475.Contig4_All
		CL6577.Contig3_All
		CL6629.Contig1_All
		CL6629.Contig2_All
		CL6838.Contig1_All
		CL6838.Contig2_All
		CL7207.Contig1_All
		CL7207.Contig2_All
		CL7369.Contig4_All
		CL7491.Contig1_All
		CL7491.Contig3_All
		CL7491.Contig4_All
		CL7525.Contig2_All
		CL7525.Contig3_All
		CL7525.Contig5_All
		CL7636.Contig1_All
		CL7636.Contig2_All
		CL7661.Contig1_All
		CL7661.Contig2_All
		CL7849.Contig1_All
		CL7864.Contig2_All
		CL7864.Contig3_All
		CL7911.Contig4_All
		CL7926.Contig1_All
		CL7926.Contig2_All
		CL7926.Contig5_All
		CL8150.Contig1_All
		CL8150.Contig2_All
		CL8181.Contig2_All
		CL8229.Contig2_All
		CL8268.Contig2_All
		CL8458.Contig1_All
		CL8458.Contig2_All
		CL8481.Contig1_All
		CL8481.Contig2_All
		CL8957.Contig2_All
		CL9286.Contig1_All
		CL9286.Contig2_All
		CL9340.Contig1_All
		CL9384.Contig2_All
		CL9568.Contig1_All
		CL9568.Contig2_All
		CL9568.Contig3_All
		CL9686.Contig2_All
		CL9764.Contig2_All
		CL9764.Contig4_All
		CL9991.Contig2_All
		CL10222.Contig1_All
		CL10476.Contig4_All
		CL10481.Contig1_All
		CL10577.Contig1_All
		CL10577.Contig2_All
		CL10687.Contig3_All
		CL10735.Contig2_All
		CL10760.Contig2_All
		CL10760.Contig5_All
		CL10818.Contig1_All
		CL10824.Contig2_All
		CL11069.Contig1_All
		CL11464.Contig1_All
		CL11464.Contig2_All
		CL11464.Contig3_All
		CL11683.Contig1_All
		CL11820.Contig2_All
		CL12120.Contig1_All
		CL12120.Contig2_All
		CL12204.Contig1_All
		CL12382.Contig1_All
		CL12645.Contig2_All
		CL12645.Contig3_All
		CL12719.Contig2_All
		CL12971.Contig1_All
		CL13061.Contig2_All
		CL13126.Contig1_All
		CL13126.Contig2_All
		CL13408.Contig2_All
		CL13916.Contig1_All
		CL13943.Contig2_All
		CL14182.Contig1_All
		CL14232.Contig1_All
		CL14308.Contig1_All
		CL14308.Contig2_All
		CL14386.Contig1_All
		CL14534.Contig2_All
		CL14619.Contig1_All
		CL14619.Contig2_All
		CL14767.Contig1_All
		CL14806.Contig2_All
		CL14828.Contig2_All
		CL14939.Contig2_All
		CL15003.Contig1_All
		CL15003.Contig2_All
		CL15030.Contig2_All
		CL15040.Contig1_All
		CL15075.Contig1_All
		CL15075.Contig2_All
		CL15100.Contig1_All
		CL15194.Contig1_All
		CL15194.Contig2_All
		CL15194.Contig3_All
		CL15404.Contig1_All
		CL15404.Contig2_All
		CL15404.Contig3_All
		CL15448.Contig3_All
		CL15689.Contig2_All
		CL15689.Contig3_All
		CL15689.Contig4_All
		CL15789.Contig2_All
		CL15789.Contig3_All
		CL15839.Contig1_All
		CL15839.Contig5_All
		CL15839.Contig11_All
		CL15858.Contig1_All
		CL15971.Contig3_All
		CL16014.Contig1_All
		Unigene1_All
		Unigene14_All
		Unigene493_All
		Unigene606_All
		Unigene822_All
		Unigene1074_All
		Unigene1246_All
		Unigene1269_All
		Unigene1519_All
		Unigene2253_All
		Unigene3238_All
		Unigene3698_All
		Unigene3713_All
		Unigene3727_All
		Unigene3729_All
		Unigene3959_All
		Unigene4115_All
		Unigene4129_All
		Unigene4209_All
		Unigene4556_All
		Unigene4715_All
		Unigene4870_All
		Unigene5064_All
		Unigene5466_All
		Unigene5949_All
		Unigene5967_All
		Unigene6263_All
		Unigene6375_All
		Unigene6993_All
		Unigene7428_All
		Unigene7522_All
		Unigene7598_All
		Unigene7672_All
		Unigene7854_All
		Unigene7865_All
		Unigene8103_All
		Unigene8236_All
		Unigene8989_All
		Unigene9793_All
		Unigene9879_All
		Unigene9922_All
		Unigene10707_All
		Unigene11736_All
		Unigene12037_All
		Unigene12512_All
		Unigene12916_All
		Unigene12918_All
		Unigene12997_All
		Unigene13207_All
		Unigene13254_All
		Unigene13273_All
		Unigene13428_All
		Unigene13503_All
		Unigene13775_All
		Unigene14119_All
		Unigene14770_All
		Unigene14894_All
		Unigene14895_All
		Unigene15103_All
		Unigene15413_All
		Unigene15654_All
		Unigene15802_All
		Unigene15935_All
		Unigene16093_All
		Unigene16109_All
		Unigene16248_All
		Unigene16471_All
		Unigene16481_All
		Unigene16765_All
		Unigene17134_All
		Unigene17547_All
		Unigene17556_All
		Unigene17576_All
		Unigene18602_All
		Unigene18654_All
		Unigene18690_All
		Unigene18695_All
		Unigene18793_All
		Unigene18824_All
		Unigene18954_All
		Unigene19388_All
		Unigene19424_All
		Unigene19498_All
		Unigene19832_All
		Unigene19911_All
		Unigene20280_All
		Unigene20361_All
		Unigene20489_All
		Unigene21026_All
		Unigene21570_All
		Unigene22814_All
		Unigene22861_All
		Unigene23085_All
		Unigene23553_All
		Unigene23932_All
		Unigene24202_All
		Unigene24681_All
		Unigene24975_All
		Unigene25389_All
		Unigene25390_All
		Unigene25392_All
		Unigene25442_All
		Unigene25443_All
		Unigene25838_All
		Unigene25879_All
		Unigene25939_All
		Unigene26018_All
		Unigene26047_All
		Unigene26339_All
		Unigene26764_All
		Unigene27592_All
		Unigene28344_All
		Unigene28799_All
		Unigene28955_All
		Unigene28958_All
		Unigene29107_All
		Unigene29126_All
		Unigene29489_All
		Unigene29663_All
		Unigene30060_All
		Unigene30228_All
		Unigene31458_All
		Unigene32630_All
		Unigene32715_All
		Unigene33000_All
		Unigene34068_All
		Unigene34397_All
		Unigene34730_All
		Unigene34934_All
		Unigene34969_All
		Unigene35022_All
		Unigene35106_All
		Unigene35128_All
		Unigene35998_All
		Unigene36058_All
		Unigene39570_All
		Unigene40343_All
		Unigene40479_All
		Unigene41562_All
		Unigene42148_All
		Unigene42575_All
		Unigene42577_All
		Unigene44857_All
		Unigene45638_All
		Unigene46053_All
		Unigene47177_All
		Unigene47863_All
		Unigene47864_All
		Unigene48103_All
		Unigene48636_All
		Unigene48637_All
		Unigene48757_All
		Unigene50645_All
		Unigene50937_All
miR419	13	CL140.Contig4_All
		CL140.Contig5_All
		CL140.Contig6_All
		CL5627.Contig2_All
		CL13100.Contig1_All
		CL13100.Contig2_All
		Unigene238_All
		Unigene3778_All
		Unigene3779_All
		Unigene7560_All
		Unigene12437_All
		Unigene14793_All
		Unigene50004_All
miR4250	1	CL11924.Contig1_All
miR4380b	2	CL14676.Contig1_All
		CL14676.Contig2_All
miR4387e	3	Unigene11810_All
		Unigene46874_All
		Unigene46875_All
miR4403	2	CL11310.Contig1_All
		Unigene37465_All
miR474b	1	CL9219.Contig1_All
miR479	1	Unigene48846_All
miR5020a	1	Unigene12187_All
miR5021	44	CL39.Contig3_All
		CL39.Contig4_All
		CL1026.Contig3_All
		CL1026.Contig4_All
		CL1026.Contig5_All
		CL1026.Contig6_All
		CL1813.Contig2_All
		CL3527.Contig1_All
		CL3621.Contig1_All
		CL4828.Contig1_All
		CL4970.Contig1_All
		CL4970.Contig7_All
		CL5140.Contig2_All
		CL5652.Contig1_All
		CL7155.Contig2_All
		CL7331.Contig1_All
		CL8325.Contig1_All
		CL8325.Contig2_All
		CL9607.Contig4_All
		CL9607.Contig5_All
		CL9937.Contig5_All
		CL11776.Contig1_All
		CL12803.Contig3_All
		CL13019.Contig1_All
		CL13019.Contig2_All
		CL13854.Contig1_All
		CL14735.Contig1_All
		CL14735.Contig2_All
		CL15212.Contig1_All
		Unigene7974_All
		Unigene8421_All
		Unigene9353_All
		Unigene14019_All
		Unigene14046_All
		Unigene15065_All
		Unigene21794_All
		Unigene21795_All
		Unigene25777_All
		Unigene26667_All
		Unigene31853_All
		Unigene32722_All
		Unigene33371_All
		Unigene47032_All
		Unigene49221_All
miR5049c	3	CL559.Contig1_All
		CL559.Contig7_All
		Unigene1703_All
miR5077	7	CL5738.Contig3_All
		CL9583.Contig1_All
		CL14985.Contig1_All
		CL14985.Contig3_All
		Unigene25313_All
		Unigene32991_All
		Unigene44175_All
miR5139	22	CL307.Contig2_All
		CL307.Contig3_All
		CL307.Contig4_All
		CL307.Contig5_All
		CL307.Contig6_All
		CL2297.Contig1_All
		CL2297.Contig4_All
		CL3440.Contig1_All
		CL12222.Contig2_All
		CL12732.Contig2_All
		Unigene5826_All
		Unigene7554_All
		Unigene7794_All
		Unigene29155_All
		Unigene29156_All
		Unigene29157_All
		Unigene29229_All
		Unigene29536_All
		Unigene30444_All
		Unigene34506_All
		Unigene42715_All
		Unigene51316_All
miR5205a	9	CL559.Contig4_All
		CL4124.Contig3_All
		CL4124.Contig4_All
		Unigene1703_All
		Unigene2808_All
		Unigene36172_All
		Unigene47054_All
		Unigene48647_All
		Unigene50482_All
miR5215	2	CL965.Contig5_All
		Unigene21756_All
miR5227	1	CL4864.Contig1_All
miR5231	7	CL3047.Contig4_All
		CL3047.Contig5_All
		CL3047.Contig6_All
		CL3047.Contig8_All
		CL3047.Contig9_All
		CL3047.Contig10_All
		CL4651.Contig1_All
miR5235a	2	Unigene29362_All
		Unigene31719_All
miR5239	2	CL10586.Contig2_All
		CL10586.Contig3_All
miR5242	1	CL12140.Contig2_All
miR5245	4	CL965.Contig4_All
		Unigene5237_All
		Unigene17499_All
		Unigene32748_All
miR5255	2	Unigene26333_All
		Unigene42111_All
miR5270a	3	CL4860.Contig4_All
		Unigene3852_All
		Unigene3854_All
miR5274b-5p	2	CL3712.Contig1_All
		Unigene14907_All
miR528-5p	2	CL11877.Contig1_All
		CL11877.Contig2_All
miR5293	61	CL5.Contig2_All
		CL1104.Contig2_All
		CL1104.Contig4_All
		CL1288.Contig2_All
		CL1489.Contig9_All
		CL1837.Contig4_All
		CL3098.Contig4_All
		CL3427.Contig2_All
		CL4026.Contig2_All
		CL4026.Contig3_All
		CL4321.Contig6_All
		CL4777.Contig2_All
		CL5140.Contig2_All
		CL7596.Contig2_All
		CL8162.Contig1_All
		CL8162.Contig2_All
		CL8162.Contig5_All
		CL8295.Contig2_All
		CL8295.Contig3_All
		CL8495.Contig1_All
		CL8495.Contig2_All
		CL9141.Contig1_All
		CL9141.Contig3_All
		CL9141.Contig4_All
		CL9141.Contig5_All
		CL9141.Contig6_All
		CL9141.Contig7_All
		CL9937.Contig5_All
		CL10384.Contig2_All
		CL11776.Contig1_All
		CL12692.Contig3_All
		CL12860.Contig3_All
		CL12879.Contig2_All
		CL13019.Contig1_All
		CL13019.Contig2_All
		CL13560.Contig1_All
		CL14521.Contig1_All
		CL14521.Contig2_All
		CL14947.Contig2_All
		Unigene1275_All
		Unigene4334_All
		Unigene7805_All
		Unigene7813_All
		Unigene8296_All
		Unigene11249_All
		Unigene16445_All
		Unigene16818_All
		Unigene20347_All
		Unigene20482_All
		Unigene21794_All
		Unigene21795_All
		Unigene22460_All
		Unigene23387_All
		Unigene25335_All
		Unigene25342_All
		Unigene25567_All
		Unigene27099_All
		Unigene31007_All
		Unigene34962_All
		Unigene38315_All
		Unigene47324_All
miR5298b	18	CL3081.Contig1_All
		CL3081.Contig2_All
		CL3081.Contig3_All
		CL3081.Contig4_All
		CL5088.Contig2_All
		CL5088.Contig5_All
		CL6623.Contig1_All
		CL6914.Contig1_All
		CL10426.Contig3_All
		Unigene4147_All
		Unigene7498_All
		Unigene13757_All
		Unigene23117_All
		Unigene26048_All
		Unigene31034_All
		Unigene33669_All
		Unigene36433_All
		Unigene47817_All
miR5373	9	CL561.Contig3_All
		CL965.Contig1_All
		CL3250.Contig1_All
		CL15998.Contig1_All
		Unigene21756_All
		Unigene27616_All
		Unigene32929_All
		Unigene35990_All
		Unigene42276_All
miR5380a	14	CL3402.Contig4_All
		CL3402.Contig7_All
		CL5088.Contig2_All
		CL5088.Contig5_All
		CL5533.Contig5_All
		CL5533.Contig6_All
		CL15631.Contig1_All
		CL15631.Contig2_All
		Unigene7407_All
		Unigene11630_All
		Unigene19991_All
		Unigene24591_All
		Unigene36433_All
		Unigene51990_All
miR5490	2	CL4564.Contig1_All
		CL4564.Contig2_All
miR5503	1	Unigene29067_All
miR5519	1	CL5304.Contig4_All
miR5576	1	CL250.Contig2_All
miR5640	18	CL3824.Contig1_All
		CL5928.Contig1_All
		CL5928.Contig2_All
		CL6977.Contig3_All
		CL10058.Contig1_All
		CL10058.Contig2_All
		CL11458.Contig2_All
		CL14408.Contig1_All
		CL14521.Contig1_All
		CL14521.Contig2_All
		CL14947.Contig2_All
		Unigene687_All
		Unigene11631_All
		Unigene22046_All
		Unigene24541_All
		Unigene25567_All
		Unigene28723_All
		Unigene46719_All
miR5641	13	CL4654.Contig4_All
		CL6079.Contig1_All
		CL8232.Contig3_All
		CL8242.Contig1_All
		Unigene3971_All
		Unigene3973_All
		Unigene7799_All
		Unigene8425_All
		Unigene11598_All
		Unigene19909_All
		Unigene22251_All
		Unigene23681_All
		Unigene26190_All
miR5658	2	Unigene7498_All
		Unigene13757_All
miR5662	1	CL2734.Contig2_All
miR5675	1	Unigene29457_All
miR5721	8	CL305.Contig1_All
		CL305.Contig2_All
		CL3061.Contig1_All
		CL3693.Contig1_All
		CL3693.Contig2_All
		Unigene13844_All
		Unigene42469_All
		Unigene42470_All
miR5761a	7	CL589.Contig3_All
		CL4878.Contig3_All
		CL6343.Contig2_All
		CL6895.Contig2_All
		CL7910.Contig2_All
		Unigene3968_All
		Unigene32042_All
miR5767	1	CL1594.Contig2_All
miR5793	2	CL8485.Contig1_All
		CL8485.Contig2_All
miR6111-5p	13	CL2910.Contig2_All
		CL2910.Contig4_All
		CL2910.Contig5_All
		CL3897.Contig3_All
		CL3899.Contig2_All
		CL10205.Contig1_All
		CL10205.Contig3_All
		Unigene7655_All
		Unigene18406_All
		Unigene22245_All
		Unigene29644_All
		Unigene36155_All
		Unigene42770_All
miR6114-5p	1	CL1437.Contig9_All
miR6182	3	CL12309.Contig1_All
		CL12309.Contig2_All
		Unigene28009_All
miR6220-3p	3	CL1844.Contig1_All
		CL1844.Contig3_All
		Unigene45327_All
miR6300	4	CL6892.Contig4_All
		CL6892.Contig6_All
		CL12649.Contig1_All
		CL12649.Contig2_All
miR6478	4	CL1114.Contig10_All
		CL1114.Contig11_All
		Unigene14243_All
		Unigene40679_All
miR774b-5p	7	CL5343.Contig1_All
		CL7841.Contig1_All
		CL8502.Contig1_All
		CL8502.Contig2_All
		CL15965.Contig1_All
		CL15965.Contig2_All
		Unigene13270_All
miR780.2	1	Unigene22302_All
miR812v	1	CL559.Contig4_All
miR818a	2	CL1844.Contig1_All
		CL1844.Contig3_All
miR845b-5p	12	CL234.Contig1_All
		CL234.Contig2_All
		CL7456.Contig1_All
		CL9068.Contig1_All
		CL11530.Contig1_All
		CL11530.Contig2_All
		CL14297.Contig2_All
		CL15684.Contig2_All
		Unigene2353_All
		Unigene29051_All
		Unigene29052_All
		Unigene49738_All
miR858b	4	Unigene2183_All
		Unigene2925_All
		Unigene15049_All
		Unigene19168_All
