# Supplementary material for: MicroRNA and Putative Target Discoveries in Chrysanthemum Polyploidy Breeding
Source: Int J Genomics. 2017 Dec 13;2017:6790478. doi: 10.1155/2017/6790478 (PMC5745731; doi:10.1155/2017/6790478)
Supplement: Supplementary 4 — Table S4: KEGG annotation of target genes. [file 6790478.f4.xlsx]

## Sheet: KEGG of target genes
		NE12	NE18	AE18
Number	Pathway	Target genes with pathway annotation (337)	Target genes with pathway annotation (211)	Target genes with pathway annotation (179)	Pathway ID
1	Thiamine metabolism	5 (1.48%)	4 (1.9%)	4 (2.23%)	ko00730
2	Pathogenic Escherichia coli infection	11 (3.26%)	5 (2.37%)	1 (0.56%)	ko05130
3	Basal transcription factors	7 (2.08%)		2 (1.12%)	ko03022
4	Valine, leucine and isoleucine biosynthesis	5 (1.48%)	3 (1.42%)	3 (1.68%)	ko00290
5	Fatty acid elongation	4 (1.19%)	1 (0.47%)	1 (0.56%)	ko00062
6	Non-homologous end-joining	3 (0.89%)			ko03450
7	Collecting duct acid secretion	4 (1.19%)			ko04966
8	Tuberculosis	19 (5.64%)	13 (6.16%)	16 (8.94%)	ko05152
9	Sulfur relay system	3 (0.89%)	3 (1.42%)	3 (1.68%)	ko04122
10	Homologous recombination	9 (2.67%)	3 (1.42%)	2 (1.12%)	ko03440
11	Valine, leucine and isoleucine degradation	6 (1.78%)			ko00280
12	Epithelial cell signaling in Helicobacter pylori infection	4 (1.19%)			ko05120
13	Rheumatoid arthritis	4 (1.19%)			ko05323
14	Retinol metabolism	3 (0.89%)	3 (1.42%)	3 (1.68%)	ko00830
15	Vibrio cholerae infection	5 (1.48%)			ko05110
16	One carbon pool by folate	4 (1.19%)	2 (0.95%)	3 (1.68%)	ko00670
17	Cutin, suberine and wax biosynthesis	4 (1.19%)	2 (0.95%)	2 (1.12%)	ko00073
18	Pertussis	13 (3.86%)	10 (4.74%)	12 (6.7%)	ko05133
19	Fatty acid metabolism	6 (1.78%)	2 (0.95%)	4 (2.23%)	ko00071
20	Glycine, serine and threonine metabolism	8 (2.37%)	6 (2.84%)	7 (3.91%)	ko00260
21	Glycolysis / Gluconeogenesis	9 (2.67%)	3 (1.42%)	3 (1.68%)	ko00010
22	Bacterial secretion system	3 (0.89%)			ko03070
23	TGF-beta signaling pathway	5 (1.48%)	2 (0.95%)	2 (1.12%)	ko04350
24	SNARE interactions in vesicular transport	3 (0.89%)	1 (0.47%)	1 (0.56%)	ko04130
25	Cytosolic DNA-sensing pathway	4 (1.19%)	4 (1.9%)	2 (1.12%)	ko04623
26	Lysine degradation	3 (0.89%)			ko00310
27	Neurotrophin signaling pathway	13 (3.86%)	10 (4.74%)	12 (6.7%)	ko04722
28	Chagas disease (American trypanosomiasis)	12 (3.56%)	10 (4.74%)	12 (6.7%)	ko05142
29	RNA polymerase	7 (2.08%)	5 (2.37%)	3 (1.68%)	ko03020
30	Nitrogen metabolism	4 (1.19%)	2 (0.95%)	3 (1.68%)	ko00910
31	Leishmaniasis	11 (3.26%)	10 (4.74%)	12 (6.7%)	ko05140
32	Herpes simplex infection	9 (2.67%)	3 (1.42%)	4 (2.23%)	ko05168
33	Naphthalene degradation	3 (0.89%)	2 (0.95%)	3 (1.68%)	ko00626
34	Toll-like receptor signaling pathway	11 (3.26%)	10 (4.74%)	12 (6.7%)	ko04620
35	Plant hormone signal transduction	21 (6.23%)	11 (5.21%)	10 (5.59%)	ko04075
36	Wnt signaling pathway	6 (1.78%)	3 (1.42%)	3 (1.68%)	ko04310
37	Aminoacyl-tRNA biosynthesis	7 (2.08%)	6 (2.84%)	5 (2.79%)	ko00970
38	Metabolism of xenobiotics by cytochrome P450	3 (0.89%)	2 (0.95%)	4 (2.23%)	ko00980
39	Butanoate metabolism	3 (0.89%)			ko00650
40	Spliceosome	16 (4.75%)	15 (7.11%)	10 (5.59%)	ko03040
41	Non-small cell lung cancer	2 (0.59%)	1 (0.47%)	1 (0.56%)	ko05223
42	beta-Alanine metabolism	3 (0.89%)			ko00410
43	Drug metabolism - cytochrome P450	3 (0.89%)	2 (0.95%)	4 (2.23%)	ko00982
44	Amino sugar and nucleotide sugar metabolism	8 (2.37%)	2 (0.95%)	6 (3.35%)	ko00520
45	Tryptophan metabolism	3 (0.89%)			ko00380
46	NF-kappa B signaling pathway	11 (3.26%)	11 (5.21%)	13 (7.26%)	ko04064
47	Apoptosis	11 (3.26%)	11 (5.21%)	13 (7.26%)	ko04210
48	Circadian rhythm - mammal	2 (0.59%)	2 (0.95%)	2 (1.12%)	ko04710
49	DNA replication	6 (1.78%)			ko03030
50	Nucleotide excision repair	6 (1.78%)		1 (0.56%)	ko03420
51	Alzheimer's disease	6 (1.78%)	1 (0.47%)	2 (1.12%)	ko05010
52	Phototransduction - fly	2 (0.59%)			ko04745
53	Synaptic vesicle cycle	4 (1.19%)			ko04721
54	Peptidoglycan biosynthesis	1 (0.3%)			ko00550
55	Protein export	3 (0.89%)			ko03060
56	Phagosome	5 (1.48%)			ko04145
57	Small cell lung cancer	1 (0.3%)	1 (0.47%)	1 (0.56%)	ko05222
58	Influenza A	14 (4.15%)	14 (6.64%)	15 (8.38%)	ko05164
59	Measles	11 (3.26%)	11 (5.21%)	13 (7.26%)	ko05162
60	Arrhythmogenic right ventricular cardiomyopathy (ARVC)	1 (0.3%)			ko05412
61	C5-Branched dibasic acid metabolism	1 (0.3%)			ko00660
62	Gastric acid secretion	2 (0.59%)			ko04971
63	Long-term depression	2 (0.59%)			ko04730
64	Adherens junction	3 (0.89%)			ko04520
65	Oocyte meiosis	7 (2.08%)	3 (1.42%)	3 (1.68%)	ko04114
66	VEGF signaling pathway	2 (0.59%)	1 (0.47%)	1 (0.56%)	ko04370
67	Chloroalkane and chloroalkene degradation	3 (0.89%)	2 (0.95%)	3 (1.68%)	ko00625
68	Meiosis - yeast	5 (1.48%)	2 (0.95%)	2 (1.12%)	ko04113
69	Toxoplasmosis	11 (3.26%)	10 (4.74%)	12 (6.7%)	ko05145
70	Circadian rhythm - plant	4 (1.19%)	1 (0.47%)		ko04712
71	Axon guidance	2 (0.59%)			ko04360
72	Type II diabetes mellitus	2 (0.59%)			ko04930
73	Inositol phosphate metabolism	3 (0.89%)	1 (0.47%)	1 (0.56%)	ko00562
74	Pentose and glucuronate interconversions	6 (1.78%)	8 (3.79%)	5 (2.79%)	ko00040
75	Ascorbate and aldarate metabolism	3 (0.89%)	3 (1.42%)	3 (1.68%)	ko00053
76	Tight junction	3 (0.89%)			ko04530
77	Cell cycle	8 (2.37%)	4 (1.9%)	4 (2.23%)	ko04110
78	Melanogenesis	3 (0.89%)			ko04916
79	Huntington's disease	8 (2.37%)	7 (3.32%)	4 (2.23%)	ko05016
80	Leukocyte transendothelial migration	1 (0.3%)			ko04670
81	Mismatch repair	5 (1.48%)			ko03430
82	Plant-pathogen interaction	20 (5.93%)	15 (7.11%)	13 (7.26%)	ko04626
83	Dilated cardiomyopathy	1 (0.3%)			ko05414
84	Tyrosine metabolism	12 (3.56%)	10 (4.74%)	13 (7.26%)	ko00350
85	Fructose and mannose metabolism	13 (3.86%)	11 (5.21%)	13 (7.26%)	ko00051
86	Jak-STAT signaling pathway	1 (0.3%)			ko04630
87	Glioma	2 (0.59%)			ko05214
88	Salmonella infection	2 (0.59%)			ko05132
89	Phenylalanine, tyrosine and tryptophan biosynthesis	3 (0.89%)	3 (1.42%)	3 (1.68%)	ko00400
90	Renal cell carcinoma	2 (0.59%)			ko05211
91	Phosphatidylinositol signaling system	3 (0.89%)			ko04070
92	Starch and sucrose metabolism	10 (2.97%)	7 (3.32%)	3 (1.68%)	ko00500
93	Dopaminergic synapse	3 (0.89%)	1 (0.47%)	1 (0.56%)	ko04728
94	Phototransduction	1 (0.3%)			ko04744
95	Long-term potentiation	3 (0.89%)			ko04720
96	Aldosterone-regulated sodium reabsorption	1 (0.3%)			ko04960
97	Ethylbenzene degradation	9 (2.67%)	8 (3.79%)	10 (5.59%)	ko00642
98	Sphingolipid metabolism	2 (0.59%)	1 (0.47%)	1 (0.56%)	ko00600
99	Oxidative phosphorylation	5 (1.48%)			ko00190
100	Dorso-ventral axis formation	1 (0.3%)			ko04320
101	Bladder cancer	1 (0.3%)			ko05219
102	MAPK signaling pathway - fly	1 (0.3%)			ko04013
103	Calcium signaling pathway	2 (0.59%)	1 (0.47%)	1 (0.56%)	ko04020
104	Hepatitis C	2 (0.59%)			ko05160
105	Regulation of actin cytoskeleton	3 (0.89%)			ko04810
106	Cysteine and methionine metabolism	3 (0.89%)	3 (1.42%)	3 (1.68%)	ko00270
107	Propanoate metabolism	3 (0.89%)			ko00640
108	Melanoma	1 (0.3%)			ko05218
109	Regulation of autophagy	2 (0.59%)	1 (0.47%)	1 (0.56%)	ko04140
110	Thyroid cancer	2 (0.59%)			ko05216
111	Epstein-Barr virus infection	9 (2.67%)	6 (2.84%)	2 (1.12%)	ko05169
112	Benzoate degradation	9 (2.67%)	8 (3.79%)	10 (5.59%)	ko00362
113	Glycerolipid metabolism	3 (0.89%)	3 (1.42%)	3 (1.68%)	ko00561
114	Chronic myeloid leukemia	1 (0.3%)			ko05220
115	Olfactory transduction	1 (0.3%)			ko04740
116	Viral myocarditis	1 (0.3%)			ko05416
117	Base excision repair	3 (0.89%)	1 (0.47%)		ko03410
118	Bile secretion	4 (1.19%)	5 (2.37%)	4 (2.23%)	ko04976
119	Salivary secretion	1 (0.3%)			ko04970
120	Vascular smooth muscle contraction	2 (0.59%)			ko04270
121	Transcriptional misregulation in cancer	3 (0.89%)	3 (1.42%)	3 (1.68%)	ko05202
122	Shigellosis	2 (0.59%)			ko05131
123	ABC transporters	7 (2.08%)	5 (2.37%)	8 (4.47%)	ko02010
124	Peroxisome	3 (0.89%)	1 (0.47%)		ko04146
125	Fc epsilon RI signaling pathway	1 (0.3%)			ko04664
126	Isoflavonoid biosynthesis	1 (0.3%)	1 (0.47%)	1 (0.56%)	ko00943
127	Cholinergic synapse	1 (0.3%)			ko04725
128	Cell cycle - yeast	6 (1.78%)	3 (1.42%)	3 (1.68%)	ko04111
129	Endometrial cancer	1 (0.3%)			ko05213
130	Serotonergic synapse	1 (0.3%)			ko04726
131	T cell receptor signaling pathway	1 (0.3%)			ko04660
132	Hypertrophic cardiomyopathy (HCM)	1 (0.3%)			ko05410
133	Purine metabolism	11 (3.26%)	10 (4.74%)	6 (3.35%)	ko00230
134	Phenylalanine metabolism	2 (0.59%)	2 (0.95%)	2 (1.12%)	ko00360
135	Natural killer cell mediated cytotoxicity	1 (0.3%)			ko04650
136	NOD-like receptor signaling pathway	1 (0.3%)			ko04621
137	Pantothenate and CoA biosynthesis	1 (0.3%)			ko00770
138	Focal adhesion	2 (0.59%)			ko04510
139	Acute myeloid leukemia	1 (0.3%)			ko05221
140	Citrate cycle (TCA cycle)	2 (0.59%)	1 (0.47%)		ko00020
141	Glycosaminoglycan degradation	1 (0.3%)			ko00531
142	ErbB signaling pathway	1 (0.3%)			ko04012
143	Osteoclast differentiation	1 (0.3%)	1 (0.47%)		ko04380
144	Selenocompound metabolism	1 (0.3%)	1 (0.47%)	1 (0.56%)	ko00450
145	Lysosome	5 (1.48%)	1 (0.47%)	1 (0.56%)	ko04142
146	Fc gamma R-mediated phagocytosis	8 (2.37%)	10 (4.74%)	4 (2.23%)	ko04666
147	Pyrimidine metabolism	16 (4.75%)	13 (6.16%)	13 (7.26%)	ko00240
148	Alcoholism	3 (0.89%)	1 (0.47%)		ko05034
149	B cell receptor signaling pathway	1 (0.3%)			ko04662
150	Bacterial invasion of epithelial cells	1 (0.3%)			ko05100
151	Sesquiterpenoid and triterpenoid biosynthesis	1 (0.3%)	2 (0.95%)	1 (0.56%)	ko00909
152	MAPK signaling pathway - yeast	2 (0.59%)			ko04011
153	Progesterone-mediated oocyte maturation	2 (0.59%)			ko04914
154	GnRH signaling pathway	7 (2.08%)	9 (4.27%)	3 (1.68%)	ko04912
155	Notch signaling pathway	1 (0.3%)			ko04330
156	Chemokine signaling pathway	1 (0.3%)			ko04062
157	Retrograde endocannabinoid signaling	1 (0.3%)			ko04723
158	Amphetamine addiction	1 (0.3%)			ko05031
159	Prostate cancer	2 (0.59%)		1 (0.56%)	ko05215
160	Limonene and pinene degradation	10 (2.97%)	8 (3.79%)	10 (5.59%)	ko00903
161	Fanconi anemia pathway	4 (1.19%)	7 (3.32%)	3 (1.68%)	ko03460
162	Aminobenzoate degradation	10 (2.97%)	8 (3.79%)	10 (5.59%)	ko00627
163	Antigen processing and presentation	2 (0.59%)	2 (0.95%)	3 (1.68%)	ko04612
164	Ubiquinone and other terpenoid-quinone biosynthesis	1 (0.3%)			ko00130
165	Gap junction	1 (0.3%)			ko04540
166	Colorectal cancer	1 (0.3%)			ko05210
167	Pancreatic cancer	6 (1.78%)	9 (4.27%)	3 (1.68%)	ko05212
168	Endocytosis	9 (2.67%)	10 (4.74%)	4 (2.23%)	ko04144
169	Systemic lupus erythematosus	1 (0.3%)	1 (0.47%)		ko05322
170	Glutamatergic synapse	6 (1.78%)	9 (4.27%)	3 (1.68%)	ko04724
171	alpha-Linolenic acid metabolism	1 (0.3%)	1 (0.47%)	1 (0.56%)	ko00592
172	p53 signaling pathway	2 (0.59%)	1 (0.47%)	1 (0.56%)	ko04115
173	mTOR signaling pathway	1 (0.3%)			ko04150
174	Ribosome biogenesis in eukaryotes	5 (1.48%)	6 (2.84%)	2 (1.12%)	ko03008
175	Ether lipid metabolism	5 (1.48%)	9 (4.27%)	3 (1.68%)	ko00565
176	mRNA surveillance pathway	5 (1.48%)	4 (1.9%)	4 (2.23%)	ko03015
177	Flavone and flavonol biosynthesis	1 (0.3%)	1 (0.47%)	1 (0.56%)	ko00944
178	Protein processing in endoplasmic reticulum	7 (2.08%)	4 (1.9%)	6 (3.35%)	ko04141
179	Ubiquitin mediated proteolysis	4 (1.19%)	3 (1.42%)	5 (2.79%)	ko04120
180	MAPK signaling pathway	2 (0.59%)	2 (0.95%)		ko04010
181	Microbial metabolism in diverse environments	21 (6.23%)	13 (6.16%)	14 (7.82%)	ko01120
182	Ribosome	8 (2.37%)	9 (4.27%)	11 (6.15%)	ko03010
183	Alanine, aspartate and glutamate metabolism	1 (0.3%)	1 (0.47%)	1 (0.56%)	ko00250
184	Parkinson's disease	1 (0.3%)			ko05012
185	Carbon fixation in photosynthetic organisms	1 (0.3%)			ko00710
186	Pathways in cancer	8 (2.37%)	9 (4.27%)	4 (2.23%)	ko05200
187	Prion diseases	1 (0.3%)			ko05020
188	Galactose metabolism	1 (0.3%)			ko00052
189	Terpenoid backbone biosynthesis	1 (0.3%)	3 (1.42%)	5 (2.79%)	ko00900
190	Pentose phosphate pathway	1 (0.3%)			ko00030
191	RNA transport	8 (2.37%)	7 (3.32%)	7 (3.91%)	ko03013
192	Zeatin biosynthesis	1 (0.3%)	1 (0.47%)	1 (0.56%)	ko00908
193	Other glycan degradation	1 (0.3%)			ko00511
194	Insulin signaling pathway	2 (0.59%)			ko04910
195	Polycyclic aromatic hydrocarbon degradation	1 (0.3%)			ko00624
196	Bisphenol degradation	1 (0.3%)			ko00363
197	Arginine and proline metabolism	1 (0.3%)	1 (0.47%)	1 (0.56%)	ko00330
198	Pyruvate metabolism	2 (0.59%)			ko00620
199	Flavonoid biosynthesis	1 (0.3%)	1 (0.47%)	1 (0.56%)	ko00941
200	Biosynthesis of secondary metabolites	32 (9.5%)	19 (9%)	20 (11.17%)	ko01110
201	Glycerophospholipid metabolism	5 (1.48%)	9 (4.27%)	3 (1.68%)	ko00564
202	Two-component system	1 (0.3%)	1 (0.47%)	1 (0.56%)	ko02020
203	Stilbenoid, diarylheptanoid and gingerol biosynthesis	1 (0.3%)			ko00945
204	HTLV-I infection	2 (0.59%)	2 (0.95%)	2 (1.12%)	ko05166
205	RNA degradation	2 (0.59%)		1 (0.56%)	ko03018
206	Phenylpropanoid biosynthesis	1 (0.3%)	1 (0.47%)	1 (0.56%)	ko00940
207	Metabolic pathways	64 (18.99%)	44 (20.85%)	38 (21.23%)	ko01100
