# Supplementary material for: MicroRNA and Putative Target Discoveries in Chrysanthemum Polyploidy Breeding
Source: Int J Genomics. 2017 Dec 13;2017:6790478. doi: 10.1155/2017/6790478 (PMC5745731; doi:10.1155/2017/6790478)
Supplement: Supplementary 5 — Table S5: annotation of all target genes. [file 6790478.f5.xlsx]

## Sheet: Sheet1
Gene ID	Gene Length	NE12_FPKM	NE18_FPKM	AE18_FPKM	Nr-ID	Nr-Score	Nr-Evalue	Nr-annotation	Nt-ID	Nt-Score	Nt-Evalue	Nt-annotation	Swissprot-ID	Swissprot-Score	Swissprot-Evalue	Swissprot-annotation	COG-Protein-or-Domain	COG-Score	COG-Evalue	COG-ID	COG-Function-Description	KO_id	KEGG-Evalue	KEGG-Score	KEGG-Gene	ko_definition	GO-BiologicalProcess	GO-MolecularFunction	Go-CellularComponent
CL10058.Contig1_All	1356	8.7748	8.9989	7.8832	gi|225448605|ref|XP_002278805.1|	455.3	9e-127	PREDICTED: uncharacterized protein At2g40430 [Vitis vinifera] >gi|297736529|emb|CBI25400.3| unnamed protein product [Vitis vinifera]	gi|225448604|ref|XM_002278769.1|	103	4e-19	PREDICTED: Vitis vinifera uncharacterized LOC100250159 (LOC100250159), mRNA	sp|O22892|GSR2_ARATH	255	5e-68	Uncharacterized protein At2g40430 OS=Arabidopsis thaliana GN=At2g40430 PE=1 SV=2	--	--	--	--	--	K14840	9e-128	455	vvi:100250159	nucleolar protein 53	-	-	-
CL10058.Contig2_All	1350	11.7954	12.4697	11.8441	gi|225448605|ref|XP_002278805.1|	460.3	2e-128	PREDICTED: uncharacterized protein At2g40430 [Vitis vinifera] >gi|297736529|emb|CBI25400.3| unnamed protein product [Vitis vinifera]	gi|225448604|ref|XM_002278769.1|	103	4e-19	PREDICTED: Vitis vinifera uncharacterized LOC100250159 (LOC100250159), mRNA	sp|O22892|GSR2_ARATH	253	2e-67	Uncharacterized protein At2g40430 OS=Arabidopsis thaliana GN=At2g40430 PE=1 SV=2	--	--	--	--	--	K14840	3e-129	460	vvi:100250159	nucleolar protein 53	-	-	-
CL10082.Contig1_All	2509	6.4525	5.609	4.6722	gi|297740062|emb|CBI30244.3|	559.3	1e-157	unnamed protein product [Vitis vinifera]	gi|357445858|ref|XM_003593159.1|	121	4e-24	Medicago truncatula Repressor of silencing (MTR_2g008920) mRNA, complete cds	sp|Q9SJQ6|ROS1_ARATH	554	8e-158	Protein ROS1 OS=Arabidopsis thaliana GN=ROS1 PE=1 SV=2	DR2438	95.1	5e-19	COG0177	Predicted EndoIII-related endonuclease	K10773	2e-12	73.2	cme:CMD139C	endonuclease III [EC:4.2.99.18]	GO:0006281//DNA repair;GO:0006306//DNA methylation;GO:0080111//DNA demethylation;GO:0031936//negative regulation of chromatin silencing	GO:0003906//DNA-(apurinic or apyrimidinic site) lyase activity;GO:0019104//DNA N-glycosylase activity;GO:0005515//protein binding	GO:0005634//nucleus
CL10205.Contig1_All	289	0.4592	1.2328	2.3312	gi|359488520|ref|XP_003633771.1|	138.7	2e-32	PREDICTED: receptor-like protein kinase FERONIA-like [Vitis vinifera]	--	--	--	--	sp|Q9SJT0|Y2214_ARATH	134	2e-32	Probable receptor-like protein kinase At2g21480 OS=Arabidopsis thaliana GN=At2g21480 PE=2 SV=1	aq_576	56.2	1e-08	COG0515	Serine/threonine protein kinase	K04733	4e-29	124	aly:ARALYDRAFT_916421	interleukin-1 receptor-associated kinase 4 [EC:2.7.11.1]	GO:0006468//protein phosphorylation	GO:0005524//ATP binding;GO:0004674//protein serine/threonine kinase activity	-
CL10205.Contig3_All	864	2.611	2.4741	3.431	gi|359488516|ref|XP_003633769.1|	278.1	1e-73	PREDICTED: receptor-like protein kinase FERONIA-like [Vitis vinifera]	gi|167860921|gb|EU272669.1|	63.9	2e-07	Fragaria x ananassa clone oso-7 pto-like protein gene, partial cds	sp|Q3E8W4|ANX2_ARATH	255	3e-68	Receptor-like protein kinase ANXUR2 OS=Arabidopsis thaliana GN=ANX2 PE=2 SV=1	aq_576	82.4	9e-16	COG0515	Serine/threonine protein kinase	K04733	5e-64	242	aly:ARALYDRAFT_916421	interleukin-1 receptor-associated kinase 4 [EC:2.7.11.1]	GO:0016310//phosphorylation	GO:0004672//protein kinase activity	-
CL10222.Contig1_All	1282	2.2082	2.3275	3.2232	gi|356546225|ref|XP_003541530.1|	226.5	6e-58	PREDICTED: pre-mRNA-splicing factor CWC22 homolog [Glycine max]	gi|356524174|ref|XM_003530659.1|	111	2e-21	PREDICTED: Glycine max pre-mRNA-splicing factor CWC22 homolog (LOC100814050), mRNA	sp|Q9LK58|PP225_ARATH	48.5	8e-06	Pentatricopeptide repeat-containing protein At3g13150 OS=Arabidopsis thaliana GN=At3g13150 PE=2 SV=1	XF1267	60.1	8e-09	COG5297	Cellobiohydrolase A (1,4-beta-cellobiosidase A)	K13100	8e-59	226	gmx:100814050	pre-mRNA-splicing factor CWC22	GO:0016070//RNA metabolic process	GO:0003677//DNA binding;GO:0003723//RNA binding	GO:0005634//nucleus;GO:0005829//cytosol;GO:0009536//plastid
CL1023.Contig2_All	2784	7.6105	7.0225	7.3566	gi|297739697|emb|CBI29879.3|	989.2	0	unnamed protein product [Vitis vinifera]	gi|225441747|ref|XM_002277519.1|	176	8e-41	PREDICTED: Vitis vinifera DNA-directed RNA polymerase I subunit RPA1-like (LOC100250406), mRNA	sp|P18616|RPB1_ARATH	171	3e-42	DNA-directed RNA polymerase II subunit RPB1 OS=Arabidopsis thaliana GN=RPB205 PE=1 SV=3	SPBC4C3.05c	531	2e-150	COG0086	DNA-directed RNA polymerase, beta' subunit/160 kD subunit	K02999	0	989	vvi:100250406	DNA-directed RNA polymerase I subunit RPA1 [EC:2.7.7.6]	GO:0006606//protein import into nucleus;GO:0006354//DNA-dependent transcription, elongation;GO:0006406//mRNA export from nucleus	GO:0003899//DNA-directed RNA polymerase activity;GO:0003677//DNA binding	GO:0005829//cytosol;GO:0009506//plasmodesma;GO:0005634//nucleus
CL1026.Contig3_All	1592	3.7509	3.217	3.3291	gi|225451130|ref|XP_002266266.1|	292	1e-77	PREDICTED: vesicle-associated protein 2-2 [Vitis vinifera] >gi|298204983|emb|CBI34290.3| unnamed protein product [Vitis vinifera]	gi|225319358|dbj|AK324117.1|	61.9	2e-06	Solanum lycopersicum cDNA, clone: LEFL1071DD06, HTC in leaf	sp|B9DHD7|VAP22_ARATH	219	3e-57	Vesicle-associated protein 2-2 OS=Arabidopsis thaliana GN=PVA22 PE=1 SV=1	SPBC16G5.05c	79.7	1e-14	COG5066	VAMP-associated protein involved in inositol metabolism	--	--	--	--	--	-	GO:0005198//structural molecule activity	-
CL1026.Contig4_All	1434	4.6577	5.3727	4.8548	gi|225451130|ref|XP_002266266.1|	288.9	1e-76	PREDICTED: vesicle-associated protein 2-2 [Vitis vinifera] >gi|298204983|emb|CBI34290.3| unnamed protein product [Vitis vinifera]	gi|225319358|dbj|AK324117.1|	61.9	2e-06	Solanum lycopersicum cDNA, clone: LEFL1071DD06, HTC in leaf	sp|B9DHD7|VAP22_ARATH	214	1e-55	Vesicle-associated protein 2-2 OS=Arabidopsis thaliana GN=PVA22 PE=1 SV=1	SPBC16G5.05c	78.6	3e-14	COG5066	VAMP-associated protein involved in inositol metabolism	--	--	--	--	--	-	-	GO:0016020//membrane;GO:0044464//cell part
CL1026.Contig5_All	1547	3.8314	4.6348	4.1808	gi|225451130|ref|XP_002266266.1|	290.4	4e-77	PREDICTED: vesicle-associated protein 2-2 [Vitis vinifera] >gi|298204983|emb|CBI34290.3| unnamed protein product [Vitis vinifera]	gi|225319358|dbj|AK324117.1|	61.9	2e-06	Solanum lycopersicum cDNA, clone: LEFL1071DD06, HTC in leaf	sp|B9DHD7|VAP22_ARATH	218	7e-57	Vesicle-associated protein 2-2 OS=Arabidopsis thaliana GN=PVA22 PE=1 SV=1	SPBC16G5.05c	79	2e-14	COG5066	VAMP-associated protein involved in inositol metabolism	--	--	--	--	--	-	-	GO:0016020//membrane;GO:0044464//cell part
CL1026.Contig6_All	1479	4.7852	5.4502	4.8285	gi|225451130|ref|XP_002266266.1|	295.4	1e-78	PREDICTED: vesicle-associated protein 2-2 [Vitis vinifera] >gi|298204983|emb|CBI34290.3| unnamed protein product [Vitis vinifera]	gi|225319358|dbj|AK324117.1|	61.9	2e-06	Solanum lycopersicum cDNA, clone: LEFL1071DD06, HTC in leaf	sp|B9DHD7|VAP22_ARATH	216	2e-56	Vesicle-associated protein 2-2 OS=Arabidopsis thaliana GN=PVA22 PE=1 SV=1	SPBC16G5.05c	79.3	2e-14	COG5066	VAMP-associated protein involved in inositol metabolism	--	--	--	--	--	-	GO:0005198//structural molecule activity	GO:0016020//membrane;GO:0044464//cell part
CL10384.Contig2_All	1881	15.2851	8.334	10.4824	gi|147780244|emb|CAN65737.1|	313.9	5e-84	hypothetical protein VITISV_037753 [Vitis vinifera]	--	--	--	--	sp|Q9FNQ2|E13L2_ARATH	125	6e-29	Glucan endo-1,3-beta-glucosidase-like protein 2 OS=Arabidopsis thaliana GN=At5g61130 PE=1 SV=1	all3826	57.8	6e-08	COG3409	Putative peptidoglycan-binding domain-containing protein	K14489	3e-16	85.5	vvi:100263145	arabidopsis histidine kinase 2/3/4 (cytokinin receptor) [EC:2.7.13.3]	-	-	-
CL10426.Contig3_All	928	7.1497	7.8224	6.2919	gi|225446445|ref|XP_002276868.1|	426	3e-118	PREDICTED: nuclear cap-binding protein subunit 2-like isoform 1 [Vitis vinifera] >gi|359485224|ref|XP_003633238.1| PREDICTED: nuclear cap-binding protein subunit 2-like isoform 2 [Vitis vinifera] >gi|359485226|ref|XP_003633239.1| PREDICTED: nuclear cap-binding protein subunit 2-like isoform 3 [Vitis vinifera]	gi|359485225|ref|XM_003633191.1|	335	5e-89	PREDICTED: Vitis vinifera nuclear cap-binding protein subunit 2-like, transcript variant 3 (LOC100265980), mRNA	sp|Q9XFD1|NCBP2_ARATH	414	4e-116	Nuclear cap-binding protein subunit 2 OS=Arabidopsis thaliana GN=CBP20 PE=1 SV=1	ECU03g0760	122	9e-28	COG0724	RNA-binding proteins (RRM domain)	K12883	3e-119	426	vvi:100265980	nuclear cap-binding protein subunit 2	GO:0009086//methionine biosynthetic process;GO:0000398//mRNA splicing, via spliceosome;GO:0043687//post-translational protein modification;GO:0031053//primary miRNA processing;GO:0030422//production of siRNA involved in RNA interference;GO:0000394//RNA splicing, via endonucleolytic cleavage and ligation;GO:0045893//positive regulation of transcription, DNA-dependent;GO:0006366//transcription from…	GO:0000339//RNA cap binding;GO:0005515//protein binding;GO:0000166//nucleotide binding	GO:0005845//mRNA cap binding complex
CL10476.Contig4_All	407	23.8009	17.6169	17.436	gi|357485663|ref|XP_003613119.1|	58.2	3e-08	hypothetical protein MTR_5g032980 [Medicago truncatula] >gi|355514454|gb|AES96077.1| hypothetical protein MTR_5g032980 [Medicago truncatula]	gi|259121663|gb|GQ461460.1|	60	2e-06	Linum usitatissimum clone LU0CT0D1148 microsatellite sequence	--	--	--	--	YOR310c	52.8	2e-07	COG1498	Protein implicated in ribosomal biogenesis, Nop56p homolog	K03004	5e-06	47.8	olu:OSTLU_25861	DNA-directed RNA polymerase I subunit RPA43	-	-	-
CL10481.Contig1_All	750	10.7338	11.8165	11.9771	gi|255543541|ref|XP_002512833.1|	188	1e-46	conserved hypothetical protein [Ricinus communis] >gi|223547844|gb|EEF49336.1| conserved hypothetical protein [Ricinus communis]	--	--	--	--	--	--	--	--	--	--	--	--	--	K11323	6e-06	49.3	vcn:VOLCADRAFT_121342	histone arginine demethylase JMJD6 [EC:1.14.11.-]	-	-	-
CL105.Contig1_All	3614	9.5099	11.1152	10.3773	gi|225451428|ref|XP_002273749.1|	771.9	0	PREDICTED: SWI/SNF complex component SNF12 homolog [Vitis vinifera]	gi|359488498|ref|XM_002273713.2|	371	3e-99	PREDICTED: Vitis vinifera SWI/SNF complex component SNF12 homolog-like (LOC100261825), mRNA	sp|Q9FMT4|SNF12_ARATH	731	0	SWI/SNF complex component SNF12 homolog OS=Arabidopsis thaliana GN=At5g14170 PE=1 SV=1	SPAC23G3.10c	201	6e-51	COG5531	SWIB-domain-containing proteins implicated in chromatin remodeling	K11650	0	771	vvi:100261825	SWI/SNF-related matrix-associated actin-dependent regulator of chromatin subfamily D	GO:0008284//positive regulation of cell proliferation;GO:0010224//response to UV-B;GO:0000956//nuclear-transcribed mRNA catabolic process;GO:0048364//root development;GO:0006281//DNA repair	-	GO:0005634//nucleus
CL1050.Contig1_All	2278	8.1747	6.9989	8.5964	gi|356574499|ref|XP_003555384.1|	300.4	7e-80	PREDICTED: protein NLP6-like [Glycine max]	--	--	--	--	sp|Q84TH9|NLP7_ARATH	278	1e-74	Protein NLP7 OS=Arabidopsis thaliana GN=NLP7 PE=1 SV=2	--	--	--	--	--	--	--	--	--	--	GO:0050896//response to stimulus	-	-
CL10577.Contig1_All	1655	5.4523	4.7629	4.4507	gi|224110522|ref|XP_002315545.1|	619	6e-176	predicted protein [Populus trichocarpa] >gi|222864585|gb|EEF01716.1| predicted protein [Populus trichocarpa]	gi|225322016|dbj|AK326032.1|	151	3e-33	Solanum lycopersicum cDNA, clone: LEFL2001DD04, HTC in fruit	sp|O24467|LE14B_PRUAR	615	2e-176	LEC14B homolog OS=Prunus armeniaca PE=2 SV=1	all0283_3	85.9	2e-16	COG2319	FOG: WD40 repeat	K11801	6e-177	619	pop:POPTR_1089316	WD repeat-containing protein 23	-	GO:0000166//nucleotide binding	GO:0080008//Cul4-RING ubiquitin ligase complex;GO:0005737//cytoplasm
CL10577.Contig2_All	1673	3.2785	3.0613	3.0337	gi|224110522|ref|XP_002315545.1|	238	1e-172	predicted protein [Populus trichocarpa] >gi|222864585|gb|EEF01716.1| predicted protein [Populus trichocarpa]	gi|225322016|dbj|AK326032.1|	151	3e-33	Solanum lycopersicum cDNA, clone: LEFL2001DD04, HTC in fruit	sp|O24467|LE14B_PRUAR	387	7e-172	LEC14B homolog OS=Prunus armeniaca PE=2 SV=1	all0438_2	76.6	1e-13	COG2319	FOG: WD40 repeat	K11801	1e-173	393	pop:POPTR_1089316	WD repeat-containing protein 23	-	GO:0000166//nucleotide binding	GO:0080008//Cul4-RING ubiquitin ligase complex;GO:0005737//cytoplasm
CL10585.Contig2_All	1864	21.9028	18.5163	18.7223	gi|156070763|gb|ABU45178.1|	573.9	2e-162	unknown [Solanum melongena]	gi|156070777|gb|EF517793.1|	101	2e-18	Petunia integrifolia subsp. inflata BAC 126I14, complete sequence	sp|O23210|SCL15_ARATH	388	7e-108	Scarecrow-like protein 15 OS=Arabidopsis thaliana GN=SCL15 PE=2 SV=3	--	--	--	--	--	K14494	1e-25	116	ppp:PHYPADRAFT_235432	DELLA protein	GO:0030154//cell differentiation;GO:0048831//regulation of shoot development;GO:0006355//regulation of transcription, DNA-dependent	-	-
CL10586.Contig2_All	1273	116.784	113.663	133.049	gi|225425073|ref|XP_002273185.1|	156	1e-36	PREDICTED: UPF0496 protein 4 [Vitis vinifera]	--	--	--	--	sp|Q337C0|U496D_ORYSJ	76.3	4e-14	UPF0496 protein 4 OS=Oryza sativa subsp. japonica GN=Os10g0513300 PE=2 SV=1	--	--	--	--	--	--	--	--	--	--	-	-	-
CL10586.Contig3_All	1265	112.872	109.629	124.659	gi|225425073|ref|XP_002273185.1|	155.6	1e-36	PREDICTED: UPF0496 protein 4 [Vitis vinifera]	--	--	--	--	sp|Q337C0|U496D_ORYSJ	75.9	5e-14	UPF0496 protein 4 OS=Oryza sativa subsp. japonica GN=Os10g0513300 PE=2 SV=1	--	--	--	--	--	--	--	--	--	--	-	-	-
CL10687.Contig3_All	4155	9.3043	7.9637	7.5344	gi|359474506|ref|XP_002279753.2|	775	0	PREDICTED: uncharacterized protein LOC100267731 [Vitis vinifera]	gi|359474505|ref|XM_002279717.2|	73.8	1e-09	PREDICTED: Vitis vinifera uncharacterized LOC100267731 (LOC100267731), mRNA	sp|A4PBL4|RAD54_ORYSJ	157	4e-38	DNA repair and recombination protein RAD54 OS=Oryza sativa subsp. japonica GN=RAD54 PE=1 SV=1	SPAC15A10.03c	166	2e-40	COG0553	Superfamily II DNA/RNA helicases, SNF2 family	K10779	7e-45	181	smo:SELMODRAFT_443867	transcriptional regulator ATRX [EC:3.6.4.12]	GO:0044260;GO:0050896//response to stimulus;GO:0044238//primary metabolic process;GO:0050789//regulation of biological process	GO:1901363;GO:0097159//organic cyclic compound binding	-
CL10701.Contig1_All	1063	1.7893	1.9272	3.4224	gi|224129990|ref|XP_002320721.1|	141	2e-32	predicted protein [Populus trichocarpa] >gi|222861494|gb|EEE99036.1| predicted protein [Populus trichocarpa]	--	--	--	--	--	--	--	--	--	--	--	--	--	--	--	--	--	--	-	-	-
CL10701.Contig2_All	1137	3.1901	2.8201	3.1997	gi|224129990|ref|XP_002320721.1|	162.5	1e-38	predicted protein [Populus trichocarpa] >gi|222861494|gb|EEE99036.1| predicted protein [Populus trichocarpa]	--	--	--	--	--	--	--	--	--	--	--	--	--	--	--	--	--	--	-	-	-
CL10735.Contig2_All	1269	11.9906	12.8094	16.9535	gi|255543541|ref|XP_002512833.1|	186	9e-46	conserved hypothetical protein [Ricinus communis] >gi|223547844|gb|EEF49336.1| conserved hypothetical protein [Ricinus communis]	--	--	--	--	--	--	--	--	--	--	--	--	--	--	--	--	--	--	-	-	-
CL10760.Contig2_All	620	2.7824	2.8732	3.1875	gi|225461311|ref|XP_002281726.1|	204.5	8e-52	PREDICTED: double-strand break repair protein MRE11 [Vitis vinifera] >gi|302143084|emb|CBI20379.3| unnamed protein product [Vitis vinifera]	--	--	--	--	sp|Q9XGM2|MRE11_ARATH	159	2e-39	Double-strand break repair protein MRE11 OS=Arabidopsis thaliana GN=MRE11 PE=2 SV=1	--	--	--	--	--	K10865	8e-53	204	vvi:100252167	double-strand break repair protein MRE11	GO:0006281//DNA repair	GO:0004518//nuclease activity	GO:0000791//euchromatin;GO:0000795//synaptonemal complex
CL10760.Contig5_All	2311	2.316	2.7557	2.9541	gi|225461311|ref|XP_002281726.1|	1093.6	0	PREDICTED: double-strand break repair protein MRE11 [Vitis vinifera] >gi|302143084|emb|CBI20379.3| unnamed protein product [Vitis vinifera]	gi|225461310|ref|XM_002281690.1|	636	1e-179	PREDICTED: Vitis vinifera Mre11 DNA repair/recombination protein (LOC100252167), mRNA	sp|Q9XGM2|MRE11_ARATH	1018	0	Double-strand break repair protein MRE11 OS=Arabidopsis thaliana GN=MRE11 PE=2 SV=1	SPAC13C5.07	378	2e-104	COG0420	DNA repair exonuclease	K10865	0	1093	vvi:100252167	double-strand break repair protein MRE11	GO:0090305//nucleic acid phosphodiester bond hydrolysis;GO:0007126//meiosis;GO:0006302//double-strand break repair	GO:0004519//endonuclease activity;GO:0030145//manganese ion binding;GO:0004722//protein serine/threonine phosphatase activity;GO:0004527//exonuclease activity	GO:0000791//euchromatin;GO:0000795//synaptonemal complex
CL10783.Contig2_All	2360	7.8907	7.5671	7.9552	gi|225435334|ref|XP_002282437.1|	820.1	0	PREDICTED: auxin response factor 18-like [Vitis vinifera]	gi|337273024|gb|JF911788.1|	145	2e-31	Solanum lycopersicum cultivar MP1 auxin response factor 10 mRNA, complete cds	sp|Q653H7|ARFR_ORYSJ	698	0	Auxin response factor 18 OS=Oryza sativa subsp. japonica GN=ARF18 PE=2 SV=1	--	--	--	--	--	K14486	9e-73	273	ppp:PHYPADRAFT_127229	auxin response factor	GO:0080090//regulation of primary metabolic process;GO:0009733//response to auxin stimulus;GO:0031326;GO:0009755//hormone-mediated signaling pathway;GO:0048513//organ development;GO:0048608//reproductive structure development;GO:0006351//transcription, DNA-dependent	GO:0005488//binding	-
CL10818.Contig1_All	2941	20.6951	31.1637	37.3395	gi|89114124|gb|ABD61653.1|	1520.4	0	sucrose synthase [Cichorium intybus]	gi|89114123|gb|DQ400357.1|	1719	0	Cichorium intybus sucrose synthase (SUS4) mRNA, complete cds	sp|P49035|SUS1_DAUCA	1438	0	Sucrose synthase isoform 1 OS=Daucus carota PE=2 SV=1	all1059	568	2e-161	COG0438	Glycosyltransferase	K00695	0	1357	vvi:100249279	sucrose synthase [EC:2.4.1.13]	GO:0009058//biosynthetic process;GO:0005985//sucrose metabolic process	GO:0016157//sucrose synthase activity	-
CL10824.Contig2_All	2771	19.283	21.1986	19.7908	gi|255565101|ref|XP_002523543.1|	573.2	7e-162	zinc finger protein, putative [Ricinus communis] >gi|223537250|gb|EEF38882.1| zinc finger protein, putative [Ricinus communis]	gi|357478466|ref|XM_003609471.1|	75.8	2e-10	Medicago truncatula Zinc finger CCCH-type with G patch domain-containing protein (MTR_4g116570) mRNA, complete cds	sp|Q6K687|C3H18_ORYSJ	59.3	1e-08	Zinc finger CCCH domain-containing protein 18 OS=Oryza sativa subsp. japonica GN=Os02g0793000 PE=2 SV=1	--	--	--	--	--	K13103	1e-16	87	vcn:VOLCADRAFT_65509	tuftelin-interacting protein 11	-	-	-
CL1104.Contig2_All	3812	6.498	5.9816	7.1519	gi|359483388|ref|XP_002264179.2|	932.2	0	PREDICTED: uncharacterized protein LOC100250303 [Vitis vinifera]	gi|356564475|ref|XM_003550432.1|	139	2e-29	PREDICTED: Glycine max uncharacterized protein LOC100806419 (LOC100806419), mRNA	sp|Q8H0U8|RH42_ARATH	53.5	9e-07	DEAD-box ATP-dependent RNA helicase 42 OS=Arabidopsis thaliana GN=RH42 PE=1 SV=2	--	--	--	--	--	K15601	0	945	vvi:100250303	lysine-specific demethylase 3 [EC:1.14.11.-]	GO:0006355//regulation of transcription, DNA-dependent	-	-
CL1104.Contig4_All	3823	4.4777	4.6247	5.3103	gi|147800953|emb|CAN60121.1|	695.3	0	hypothetical protein VITISV_038746 [Vitis vinifera]	gi|356564475|ref|XM_003550432.1|	139	2e-29	PREDICTED: Glycine max uncharacterized protein LOC100806419 (LOC100806419), mRNA	sp|Q8H0U8|RH42_ARATH	53.5	9e-07	DEAD-box ATP-dependent RNA helicase 42 OS=Arabidopsis thaliana GN=RH42 PE=1 SV=2	--	--	--	--	--	K15601	0	694	vvi:100250303	lysine-specific demethylase 3 [EC:1.14.11.-]	GO:0006355//regulation of transcription, DNA-dependent	-	-
CL11069.Contig1_All	888	1.594	2.2067	4.0463	gi|356574499|ref|XP_003555384.1|	103.2	5e-21	PREDICTED: protein NLP6-like [Glycine max]	--	--	--	--	sp|Q8RWY4|NLP6_ARATH	100	1e-21	Protein NLP6 OS=Arabidopsis thaliana GN=NLP6 PE=2 SV=2	--	--	--	--	--	--	--	--	--	--	GO:0050896//response to stimulus	-	-
CL11075.Contig1_All	2106	23.1666	20.3642	23.2676	gi|255571695|ref|XP_002526791.1|	901.4	0	ankyrin repeat-containing protein, putative [Ricinus communis] >gi|223533867|gb|EEF35597.1| ankyrin repeat-containing protein, putative [Ricinus communis]	gi|295843814|gb|AC235732.3|	325	1e-85	Solanum lycopersicum chromosome 5 clone C05HBa0210G09, complete sequence	sp|Q9C7A2|Y3236_ARATH	874	0	Ankyrin repeat-containing protein At3g12360 OS=Arabidopsis thaliana GN=At3g12360 PE=2 SV=1	RSc0257	86.7	1e-16	COG0666	FOG: Ankyrin repeat	K06694	3e-14	79	mtr:MTR_5g043640	26S proteasome non-ATPase regulatory subunit 10	GO:0009651//response to salt stress;GO:0009860//pollen tube growth;GO:0034613//cellular protein localization;GO:0009827//plant-type cell wall modification	GO:0005515//protein binding	GO:0009536//plastid;GO:0005634//nucleus;GO:0005886//plasma membrane
CL1114.Contig10_All	1056	2.4713	2.0665	1.999	gi|359474744|ref|XP_003631527.1|	435.6	5e-121	PREDICTED: LRR receptor-like serine/threonine-protein kinase FEI 1-like isoform 2 [Vitis vinifera]	gi|359474743|ref|XM_003631479.1|	289	3e-75	PREDICTED: Vitis vinifera LRR receptor-like serine/threonine-protein kinase FEI 1-like, transcript variant 2 (LOC100264793), mRNA	sp|C0LGL9|FEI2_ARATH	424	6e-119	LRR receptor-like serine/threonine-protein kinase FEI 2 OS=Arabidopsis thaliana GN=FEI2 PE=1 SV=1	CAC0404_1	91.7	2e-18	COG0515	Serine/threonine protein kinase	K04733	1e-54	211	smo:SELMODRAFT_159261	interleukin-1 receptor-associated kinase 4 [EC:2.7.11.1]	GO:0030243//cellulose metabolic process;GO:0009825//multidimensional cell growth;GO:0009664//plant-type cell wall organization;GO:0043481//anthocyanin accumulation in tissues in response to UV light;GO:0048767//root hair elongation;GO:0046777//protein autophosphorylation;GO:0007169//transmembrane receptor protein tyrosine kinase signaling pathway;GO:0005982//starch metabolic process;GO:0010817//r…	GO:0004674//protein serine/threonine kinase activity;GO:0004714//transmembrane receptor protein tyrosine kinase activity;GO:0005524//ATP binding	GO:0016023//cytoplasmic membrane-bounded vesicle;GO:0016021//integral to membrane;GO:0005886//plasma membrane
CL1114.Contig11_All	504	3.7738	2.8276	4.0993	gi|359807028|ref|NP_001241081.1|	233.8	7e-61	LRR receptor-like serine/threonine-protein kinase FEI 1-like precursor [Glycine max] >gi|223452298|gb|ACM89477.1| leucine-rich repeat transmembrane protein kinase [Glycine max]	gi|359474743|ref|XM_003631479.1|	214	6e-53	PREDICTED: Vitis vinifera LRR receptor-like serine/threonine-protein kinase FEI 1-like, transcript variant 2 (LOC100264793), mRNA	sp|C0LGF4|FEI1_ARATH	231	2e-61	LRR receptor-like serine/threonine-protein kinase FEI 1 OS=Arabidopsis thaliana GN=FEI1 PE=1 SV=1	CAC0404_1	64.3	1e-10	COG0515	Serine/threonine protein kinase	K04733	6e-36	147	smo:SELMODRAFT_159261	interleukin-1 receptor-associated kinase 4 [EC:2.7.11.1]	GO:0030243//cellulose metabolic process;GO:0009825//multidimensional cell growth;GO:0009664//plant-type cell wall organization;GO:0043481//anthocyanin accumulation in tissues in response to UV light;GO:0048767//root hair elongation;GO:0046777//protein autophosphorylation;GO:0007169//transmembrane receptor protein tyrosine kinase signaling pathway;GO:0005982//starch metabolic process;GO:0010817//r…	GO:0004674//protein serine/threonine kinase activity;GO:0004714//transmembrane receptor protein tyrosine kinase activity;GO:0005524//ATP binding	GO:0016023//cytoplasmic membrane-bounded vesicle;GO:0016021//integral to membrane;GO:0005886//plasma membrane
CL11310.Contig1_All	1360	27.4829	36.7739	46.6976	gi|297796571|ref|XP_002866170.1|	79.3	1e-13	hypothetical protein ARALYDRAFT_495778 [Arabidopsis lyrata subsp. lyrata] >gi|297312005|gb|EFH42429.1| hypothetical protein ARALYDRAFT_495778 [Arabidopsis lyrata subsp. lyrata]	--	--	--	--	--	--	--	--	--	--	--	--	--	--	--	--	--	--	-	-	-
CL11458.Contig2_All	1192	5.4178	4.4834	5.1244	gi|225424083|ref|XP_002282898.1|	190.7	3e-47	PREDICTED: uncharacterized protein LOC100252628 [Vitis vinifera]	--	--	--	--	sp|Q8L649|BB_ARATH	67.4	2e-11	E3 ubiquitin ligase BIG BROTHER OS=Arabidopsis thaliana GN=BB PE=1 SV=1	ECU01g0750	50.1	8e-06	COG5243	HRD ubiquitin ligase complex, ER membrane component	K14297	2e-16	85.5	mtr:MTR_1g066430	nuclear pore complex protein Nup98-Nup96	-	-	-
CL11464.Contig1_All	1057	6.8211	6.8677	7.7336	gi|351724255|ref|NP_001238331.1|	400.6	1e-110	peroxisomal enoyl-CoA hydratase/isomerase family protein [Glycine max] >gi|167963118|dbj|BAG09364.1| peroxisomal enoyl-CoA hydratase/isomerase family protein [Glycine max]	gi|357479002|ref|XM_003609739.1|	240	2e-60	Medicago truncatula 3-hydroxybutyryl-CoA dehydratase (MTR_4g122220) mRNA, complete cds	sp|Q8GYN9|MENB_ARATH	107	2e-23	1,4-Dihydroxy-2-naphthoyl-CoA synthase, peroxisomal OS=Arabidopsis thaliana GN=MENB PE=1 SV=2	CC1723	187	3e-47	COG1024	Enoyl-CoA hydratase/carnithine racemase	K12663	8e-25	112	pop:POPTR_548063	delta(3,5)-Delta(2,4)-dienoyl-CoA isomerase [EC:5.3.3.-]	GO:0006635//fatty acid beta-oxidation	GO:0016853//isomerase activity;GO:0004300//enoyl-CoA hydratase activity	GO:0005777//peroxisome;GO:0005829//cytosol;GO:0009536//plastid;GO:0005739//mitochondrion
CL11464.Contig2_All	1121	8.2468	8.8195	10.6576	gi|225431978|ref|XP_002278726.1|	414.1	1e-114	PREDICTED: 3-hydroxypropionyl-coenzyme A dehydratase [Vitis vinifera] >gi|296083235|emb|CBI22871.3| unnamed protein product [Vitis vinifera]	gi|357479002|ref|XM_003609739.1|	250	3e-63	Medicago truncatula 3-hydroxybutyryl-CoA dehydratase (MTR_4g122220) mRNA, complete cds	sp|Q8GYN9|MENB_ARATH	107	2e-23	1,4-Dihydroxy-2-naphthoyl-CoA synthase, peroxisomal OS=Arabidopsis thaliana GN=MENB PE=1 SV=2	CC1723	188	2e-47	COG1024	Enoyl-CoA hydratase/carnithine racemase	K12663	8e-25	112	pop:POPTR_548063	delta(3,5)-Delta(2,4)-dienoyl-CoA isomerase [EC:5.3.3.-]	GO:0006635//fatty acid beta-oxidation	GO:0016853//isomerase activity;GO:0004300//enoyl-CoA hydratase activity	GO:0005777//peroxisome;GO:0005829//cytosol;GO:0009536//plastid;GO:0005739//mitochondrion
CL11464.Contig3_All	1133	8.0033	8.844	9.9105	gi|225431978|ref|XP_002278726.1|	414.1	1e-114	PREDICTED: 3-hydroxypropionyl-coenzyme A dehydratase [Vitis vinifera] >gi|296083235|emb|CBI22871.3| unnamed protein product [Vitis vinifera]	gi|357479002|ref|XM_003609739.1|	250	3e-63	Medicago truncatula 3-hydroxybutyryl-CoA dehydratase (MTR_4g122220) mRNA, complete cds	sp|Q8GYN9|MENB_ARATH	107	2e-23	1,4-Dihydroxy-2-naphthoyl-CoA synthase, peroxisomal OS=Arabidopsis thaliana GN=MENB PE=1 SV=2	CC1723	188	2e-47	COG1024	Enoyl-CoA hydratase/carnithine racemase	K12663	8e-25	112	pop:POPTR_548063	delta(3,5)-Delta(2,4)-dienoyl-CoA isomerase [EC:5.3.3.-]	GO:0006635//fatty acid beta-oxidation	GO:0016853//isomerase activity;GO:0004300//enoyl-CoA hydratase activity	GO:0005777//peroxisome;GO:0005829//cytosol;GO:0009536//plastid;GO:0005739//mitochondrion
CL11530.Contig1_All	327	0.9469	0.4086	1.2362	--	--	--	--	--	--	--	--	--	--	--	--	--	--	--	--	--	--	--	--	--	--	-	-	-
CL11530.Contig2_All	226	0.9786	1.3794	0.9937	--	--	--	--	--	--	--	--	--	--	--	--	--	--	--	--	--	--	--	--	--	--	-	-	-
CL11683.Contig1_All	226	0.3914	0.3941	0.7949	--	--	--	--	--	--	--	--	--	--	--	--	--	--	--	--	--	--	--	--	--	--	-	-	-
CL11776.Contig1_All	1821	39.399	34.2386	34.2098	gi|255578426|ref|XP_002530078.1|	358.6	1e-97	conserved hypothetical protein [Ricinus communis] >gi|223530431|gb|EEF32318.1| conserved hypothetical protein [Ricinus communis]	gi|225316202|dbj|AK322155.1|	176	5e-41	Solanum lycopersicum cDNA, clone: LEFL1034AF04, HTC in leaf	sp|F4KFC7|MD26C_ARATH	291	1e-78	Probable mediator of RNA polymerase II transcription subunit 26c OS=Arabidopsis thaliana GN=MED26C PE=2 SV=1	SPAC1F7.02c	191	5e-48	COG0513	Superfamily II DNA and RNA helicases	K13179	5e-63	240	gmx:100797375	ATP-dependent RNA helicase DDX18/HAS1 [EC:3.6.4.13]	-	-	GO:0005829//cytosol
CL11820.Contig2_All	4429	54.7292	46.0832	45.9994	gi|359493041|ref|XP_002267014.2|	1527.3	0	PREDICTED: uncharacterized protein LOC100242745 [Vitis vinifera]	gi|359493040|ref|XM_002266978.2|	714	0	PREDICTED: Vitis vinifera uncharacterized LOC100242745 (LOC100242745), mRNA	sp|P51257|IF2C_PORPU	141	3e-33	Translation initiation factor IF-2, chloroplastic OS=Porphyra purpurea GN=infB PE=3 SV=1	SPAC56F8.03	800	0	COG0532	Translation initiation factor 2 (IF-2; GTPase)	K03243	0	1521	gmx:100814875	translation initiation factor 5B	GO:0006413//translational initiation	GO:0003743//translation initiation factor activity;GO:0000166//nucleotide binding	GO:0005829//cytosol;GO:0005886//plasma membrane
CL11877.Contig1_All	1324	5.5458	6.3909	5.6312	gi|255580849|ref|XP_002531244.1|	433.7	2e-120	conserved hypothetical protein [Ricinus communis] >gi|223529163|gb|EEF31141.1| conserved hypothetical protein [Ricinus communis]	gi|359483804|ref|XM_002267023.2|	77.8	2e-11	PREDICTED: Vitis vinifera uncharacterized LOC100267569 (LOC100267569), mRNA	--	--	--	--	--	--	--	--	--	--	--	--	--	--	GO:0048573//photoperiodism, flowering	-	-
CL11877.Contig2_All	1300	5.342	6.6459	5.5279	gi|255580849|ref|XP_002531244.1|	416.4	4e-115	conserved hypothetical protein [Ricinus communis] >gi|223529163|gb|EEF31141.1| conserved hypothetical protein [Ricinus communis]	gi|359483804|ref|XM_002267023.2|	77.8	2e-11	PREDICTED: Vitis vinifera uncharacterized LOC100267569 (LOC100267569), mRNA	--	--	--	--	--	--	--	--	--	--	--	--	--	--	GO:0048573//photoperiodism, flowering	-	-
CL11924.Contig1_All	402	1.6505	1.551	2.1228	--	--	--	--	--	--	--	--	--	--	--	--	--	--	--	--	--	--	--	--	--	--	-	-	-
CL12009.Contig1_All	1029	39.5903	38.2591	27.935	gi|1350984|sp|P49198.2|RS3A_HELAN	495.4	5e-139	RecName: Full=40S ribosomal protein S3a >gi|469248|gb|AAA80978.1| ribosomal protein S3a [Helianthus annuus]	gi|469247|gb|L31645.1|HNNSPSP	829	0	Helianthus annuus ribosomal protein S3a mRNA, complete cds	sp|P49198|RS3A_HELAN	495	2e-140	40S ribosomal protein S3a OS=Helianthus annuus GN=RPS3A PE=2 SV=2	SPAC13G6.02c	333	3e-91	COG1890	Ribosomal protein S3AE	K02984	3e-134	476	gmx:100805519	small subunit ribosomal protein S3Ae	GO:0006412//translation	GO:0003735//structural constituent of ribosome	GO:0005730//nucleolus;GO:0022626//cytosolic ribosome;GO:0005886//plasma membrane;GO:0005618//cell wall;GO:0009507//chloroplast
CL12009.Contig3_All	1086	35.9239	37.2763	23.9047	gi|1350984|sp|P49198.2|RS3A_HELAN	491.5	8e-138	RecName: Full=40S ribosomal protein S3a >gi|469248|gb|AAA80978.1| ribosomal protein S3a [Helianthus annuus]	gi|469247|gb|L31645.1|HNNSPSP	511	1e-142	Helianthus annuus ribosomal protein S3a mRNA, complete cds	sp|P49198|RS3A_HELAN	491	3e-139	40S ribosomal protein S3a OS=Helianthus annuus GN=RPS3A PE=2 SV=2	SPAC13G6.02c	332	5e-91	COG1890	Ribosomal protein S3AE	K02984	2e-133	473	vvi:100232969	small subunit ribosomal protein S3Ae	GO:0006412//translation	GO:0003735//structural constituent of ribosome	GO:0005840//ribosome
CL12009.Contig4_All	1041	62.4188	57.0694	41.6784	gi|1350984|sp|P49198.2|RS3A_HELAN	491.5	8e-138	RecName: Full=40S ribosomal protein S3a >gi|469248|gb|AAA80978.1| ribosomal protein S3a [Helianthus annuus]	gi|469247|gb|L31645.1|HNNSPSP	741	0	Helianthus annuus ribosomal protein S3a mRNA, complete cds	sp|P49198|RS3A_HELAN	491	3e-139	40S ribosomal protein S3a OS=Helianthus annuus GN=RPS3A PE=2 SV=2	SPAC13G6.02c	333	3e-91	COG1890	Ribosomal protein S3AE	K02984	8e-134	474	vvi:100232969	small subunit ribosomal protein S3Ae	GO:0006412//translation	GO:0003735//structural constituent of ribosome	GO:0005840//ribosome
CL12070.Contig1_All	407	4.9993	1.3131	1.7657	--	--	--	--	--	--	--	--	--	--	--	--	--	--	--	--	--	--	--	--	--	--	-	-	-
CL12085.Contig1_All	211	0.6289	1.0553	1.7029	--	--	--	--	--	--	--	--	--	--	--	--	--	--	--	--	--	--	--	--	--	--	-	-	-
CL12120.Contig1_All	277	1.4372	1.9293	2.1079	gi|218197894|gb|EEC80321.1|	53.1	1e-06	hypothetical protein OsI_22364 [Oryza sativa Indica Group]	gi|151420704|dbj|AK252056.1|	63.9	7e-08	Hordeum vulgare subsp. vulgare cDNA clone: FLbaf143i24, mRNA sequence	--	--	--	--	--	--	--	--	--	--	--	--	--	--	-	-	-
CL12120.Contig2_All	256	0.6911	2.9574	2.9826	gi|218197894|gb|EEC80321.1|	53.1	1e-06	hypothetical protein OsI_22364 [Oryza sativa Indica Group]	gi|151420704|dbj|AK252056.1|	63.9	7e-08	Hordeum vulgare subsp. vulgare cDNA clone: FLbaf143i24, mRNA sequence	--	--	--	--	--	--	--	--	--	--	--	--	--	--	-	-	-
CL12140.Contig2_All	1033	2.9974	2.9316	3.087	gi|255550546|ref|XP_002516323.1|	71.6	2e-11	ATP binding protein, putative [Ricinus communis] >gi|223544553|gb|EEF46070.1| ATP binding protein, putative [Ricinus communis]	--	--	--	--	--	--	--	--	--	--	--	--	--	--	--	--	--	--	GO:0048731;GO:0006260//DNA replication;GO:0050794//regulation of cellular process;GO:0009653//anatomical structure morphogenesis;GO:0046686//response to cadmium ion;GO:0007389//pattern specification process	GO:0097159//organic cyclic compound binding;GO:1901363	-
CL1216.Contig1_All	1174	3.617	4.3624	4.5144	gi|357466927|ref|XP_003603748.1|	342	9e-93	HVA22-like protein i [Medicago truncatula] >gi|355492796|gb|AES73999.1| HVA22-like protein i [Medicago truncatula]	gi|225458006|ref|XM_002276438.1|	236	4e-59	PREDICTED: Vitis vinifera HVA22-like protein i (LOC100245445), mRNA	sp|Q8LE10|HA22I_ARATH	315	4e-86	HVA22-like protein i OS=Arabidopsis thaliana GN=HVA22I PE=2 SV=2	SPBC30D10.09c	66.6	8e-11	COG5052	Protein involved in membrane traffic	--	--	--	--	--	GO:0009755//hormone-mediated signaling pathway	-	GO:0005634//nucleus
CL1216.Contig2_All	995	2.3561	3.5807	3.2501	gi|225458007|ref|XP_002276474.1|	342.4	5e-93	PREDICTED: HVA22-like protein i [Vitis vinifera] >gi|302142645|emb|CBI19848.3| unnamed protein product [Vitis vinifera]	gi|225458006|ref|XM_002276438.1|	236	3e-59	PREDICTED: Vitis vinifera HVA22-like protein i (LOC100245445), mRNA	sp|Q8LE10|HA22I_ARATH	311	3e-85	HVA22-like protein i OS=Arabidopsis thaliana GN=HVA22I PE=2 SV=2	SPBC30D10.09c	66.6	6e-11	COG5052	Protein involved in membrane traffic	--	--	--	--	--	GO:0009755//hormone-mediated signaling pathway	-	GO:0005634//nucleus
CL1216.Contig3_All	1026	1.9831	3.6461	2.1888	gi|225458007|ref|XP_002276474.1|	342.4	6e-93	PREDICTED: HVA22-like protein i [Vitis vinifera] >gi|302142645|emb|CBI19848.3| unnamed protein product [Vitis vinifera]	gi|225458006|ref|XM_002276438.1|	236	3e-59	PREDICTED: Vitis vinifera HVA22-like protein i (LOC100245445), mRNA	sp|Q8LE10|HA22I_ARATH	311	3e-85	HVA22-like protein i OS=Arabidopsis thaliana GN=HVA22I PE=2 SV=2	SPBC30D10.09c	65.5	1e-10	COG5052	Protein involved in membrane traffic	--	--	--	--	--	GO:0009755//hormone-mediated signaling pathway	-	GO:0005634//nucleus
CL12204.Contig1_All	1119	35.1412	15.8001	13.8476	gi|351726094|ref|NP_001236347.1|	206.8	4e-52	uncharacterized protein LOC100527202 precursor [Glycine max]	gi|47558818|gb|AY548742.1|	133	4e-28	Capsicum annuum CAPIP2 (CAPIP2) mRNA, complete cds	--	--	--	--	--	--	--	--	--	--	--	--	--	--	GO:0009695//jasmonic acid biosynthetic process;GO:0009611//response to wounding	-	GO:0031225//anchored to membrane;GO:0005774//vacuolar membrane
CL12222.Contig2_All	1337	12.1086	16.9878	19.5513	gi|359492104|ref|XP_002283584.2|	670.6	0	PREDICTED: protein DA1 [Vitis vinifera]	gi|359492103|ref|XM_002283548.2|	408	1e-111	PREDICTED: Vitis vinifera protein DA1-like (LOC100253933), mRNA	sp|P0C7Q8|DA1_ARATH	609	1e-174	Protein DA1 OS=Arabidopsis thaliana GN=DA1 PE=1 SV=1	--	--	--	--	--	K14380	3e-07	54.7	pop:POPTR_946533	four and a half LIM domains protein 2	GO:0048482//ovule morphogenesis;GO:0048317//seed morphogenesis;GO:0046621//negative regulation of organ growth	GO:0043130//ubiquitin binding;GO:0008270//zinc ion binding	GO:0005634//nucleus
CL12239.Contig2_All	513	3.3627	4.0802	2.9768	--	--	--	--	--	--	--	--	--	--	--	--	--	--	--	--	--	--	--	--	--	--	-	-	-
CL12309.Contig1_All	2704	11.6471	10.0467	10.7303	gi|359477208|ref|XP_002279515.2|	768.5	0	PREDICTED: flowering time control protein FCA [Vitis vinifera]	gi|359477207|ref|XM_002279479.2|	226	9e-56	PREDICTED: Vitis vinifera flowering time control (FCA), mRNA	sp|O04425|FCA_ARATH	561	5e-160	Flowering time control protein FCA OS=Arabidopsis thaliana GN=FCA PE=1 SV=2	SPAC140.02	63.9	1e-09	COG0724	RNA-binding proteins (RRM domain)	K13207	1e-41	170	gmx:100813239	CUG-BP- and ETR3-like factor	GO:0009987//cellular process;GO:0040029//regulation of gene expression, epigenetic;GO:0009791//post-embryonic development;GO:0048608//reproductive structure development;GO:0009790//embryo development	GO:0003676//nucleic acid binding	GO:0043229//intracellular organelle
CL12309.Contig2_All	2665	9.3279	8.6897	9.2357	gi|359477208|ref|XP_002279515.2|	755.4	0	PREDICTED: flowering time control protein FCA [Vitis vinifera]	gi|359477207|ref|XM_002279479.2|	226	9e-56	PREDICTED: Vitis vinifera flowering time control (FCA), mRNA	sp|O04425|FCA_ARATH	547	1e-155	Flowering time control protein FCA OS=Arabidopsis thaliana GN=FCA PE=1 SV=2	SPAC140.02	63.9	1e-09	COG0724	RNA-binding proteins (RRM domain)	K13207	2e-41	169	pop:POPTR_799273	CUG-BP- and ETR3-like factor	GO:0009987//cellular process;GO:0040029//regulation of gene expression, epigenetic;GO:0009791//post-embryonic development;GO:0048608//reproductive structure development;GO:0009790//embryo development	GO:0003676//nucleic acid binding	GO:0043229//intracellular organelle
CL12382.Contig1_All	404	6.8977	6.5038	9.0051	gi|298204644|emb|CBI23919.3|	69.7	1e-11	unnamed protein product [Vitis vinifera]	--	--	--	--	sp|Q39008|M3K1_ARATH	46.2	6e-06	Mitogen-activated protein kinase kinase kinase 1 OS=Arabidopsis thaliana GN=MEKK1 PE=1 SV=2	--	--	--	--	--	K13414	2e-12	68.9	vvi:100241228	mitogen-activated protein kinase kinase kinase 1, plant [EC:2.7.11.25]	GO:0009628//response to abiotic stimulus;GO:0016310//phosphorylation;GO:0006950//response to stress	GO:0004672//protein kinase activity;GO:0097159//organic cyclic compound binding;GO:1901363	-
CL12556.Contig1_All	438	1.7168	0.5084	0.5127	--	--	--	--	--	--	--	--	--	--	--	--	--	--	--	--	--	--	--	--	--	--	-	-	-
CL12556.Contig2_All	432	1.5359	0.2062	0.104	--	--	--	--	--	--	--	--	--	--	--	--	--	--	--	--	--	--	--	--	--	--	-	-	-
CL12645.Contig2_All	1961	6	4.8373	5.7488	gi|225424558|ref|XP_002282031.1|	72.4	3e-150	PREDICTED: ALBINO3-like protein 1, chloroplastic [Vitis vinifera] >gi|296081405|emb|CBI16838.3| unnamed protein product [Vitis vinifera]	gi|359473139|ref|XM_002281995.2|	496	1e-137	PREDICTED: Vitis vinifera ALBINO3-like protein 1, chloroplastic (LOC100256113), mRNA	sp|Q9FYL3|ALB31_ARATH	479	9e-142	ALBINO3-like protein 1, chloroplastic OS=Arabidopsis thaliana GN=ALB3L1 PE=2 SV=3	TP0949	129	2e-29	COG0706	Preprotein translocase subunit YidC	K03217	3e-151	484	vvi:100256113	preprotein translocase subunit YidC	GO:0009902//chloroplast relocation;GO:0010027//thylakoid membrane organization;GO:0034660//ncRNA metabolic process;GO:0007165//signal transduction;GO:0051205//protein insertion into membrane	-	GO:0005739//mitochondrion;GO:0016021//integral to membrane;GO:0009535//chloroplast thylakoid membrane;GO:0005886//plasma membrane
CL12645.Contig3_All	1978	4.4278	3.9852	4.8366	gi|225424558|ref|XP_002282031.1|	72.4	9e-134	PREDICTED: ALBINO3-like protein 1, chloroplastic [Vitis vinifera] >gi|296081405|emb|CBI16838.3| unnamed protein product [Vitis vinifera]	gi|359473139|ref|XM_002281995.2|	369	7e-99	PREDICTED: Vitis vinifera ALBINO3-like protein 1, chloroplastic (LOC100256113), mRNA	sp|Q9FYL3|ALB31_ARATH	324	9e-128	ALBINO3-like protein 1, chloroplastic OS=Arabidopsis thaliana GN=ALB3L1 PE=2 SV=3	HP1450	92.4	5e-27	COG0706	Preprotein translocase subunit YidC	K03217	9e-135	327	vvi:100256113	preprotein translocase subunit YidC	GO:0009902//chloroplast relocation;GO:0045038//protein import into chloroplast thylakoid membrane;GO:0010027//thylakoid membrane organization;GO:0090342//regulation of cell aging;GO:0034660//ncRNA metabolic process;GO:0007165//signal transduction;GO:0051205//protein insertion into membrane	GO:0015450//P-P-bond-hydrolysis-driven protein transmembrane transporter activity	GO:0005739//mitochondrion;GO:0016021//integral to membrane;GO:0009535//chloroplast thylakoid membrane;GO:0005886//plasma membrane
CL12649.Contig1_All	303	0.146	0.147	0.2965	gi|319433441|gb|ADV57638.1|	104.8	3e-22	copper binding protein 3 [Gossypium hirsutum]	--	--	--	--	sp|O80517|BCB2_ARATH	76.3	4e-15	Uclacyanin-2 OS=Arabidopsis thaliana GN=At2g44790 PE=1 SV=1	--	--	--	--	--	--	--	--	--	--	-	-	GO:0016020//membrane;GO:0044464//cell part
CL12649.Contig2_All	640	3.7321	0.9046	0.9825	gi|319433441|gb|ADV57638.1|	188.7	5e-47	copper binding protein 3 [Gossypium hirsutum]	--	--	--	--	sp|O80517|BCB2_ARATH	135	1e-32	Uclacyanin-2 OS=Arabidopsis thaliana GN=At2g44790 PE=1 SV=1	--	--	--	--	--	--	--	--	--	--	-	-	GO:0016020//membrane
CL12692.Contig3_All	2947	4.0976	2.977	2.8805	gi|296083863|emb|CBI24251.3|	1306.6	0	unnamed protein product [Vitis vinifera]	gi|359479284|ref|XM_002276241.2|	676	0	PREDICTED: Vitis vinifera uncharacterized LOC100246624 (LOC100246624), mRNA	--	--	--	--	--	--	--	--	--	--	--	--	--	--	GO:0043547//positive regulation of GTPase activity;GO:0007165//signal transduction	GO:0005100//Rho GTPase activator activity;GO:0035091//phosphatidylinositol binding	GO:0009535//chloroplast thylakoid membrane
CL12719.Contig2_All	556	8.1942	3.6044	6.8664	gi|297737444|emb|CBI26645.3|	89.4	3e-17	unnamed protein product [Vitis vinifera]	--	--	--	--	--	--	--	--	--	--	--	--	--	--	--	--	--	--	-	-	-
CL12732.Contig2_All	201	2.6408	1.1078	2.0111	--	--	--	--	--	--	--	--	--	--	--	--	--	--	--	--	--	--	--	--	--	--	-	-	-
CL12803.Contig3_All	998	7.5346	6.292	5.5355	gi|224068522|ref|XP_002326138.1|	236.9	3e-61	predicted protein [Populus trichocarpa] >gi|222833331|gb|EEE71808.1| predicted protein [Populus trichocarpa]	--	--	--	--	--	--	--	--	--	--	--	--	--	--	--	--	--	--	-	-	-
CL12860.Contig3_All	1210	2.9976	1.9507	2.2643	gi|15617438|dbj|BAB64937.1|	307.4	2e-82	TdcA1-ORF1-ORF2 [Daucus carota]	gi|224994391|emb|AM502589.1|	75.8	9e-11	Antirrhinum majus partial transposon TamRSI-3	--	--	--	--	--	--	--	--	--	--	--	--	--	--	-	-	-
CL12879.Contig2_All	698	6.844	3.573	3.0243	gi|358344028|ref|XP_003636096.1|	58.5	9e-08	hypothetical protein MTR_027s0011 [Medicago truncatula] >gi|355502031|gb|AES83234.1| hypothetical protein MTR_027s0011 [Medicago truncatula]	gi|259121621|gb|GQ461418.1|	85.7	5e-14	Linum usitatissimum clone LU0CT0D148 microsatellite sequence	sp|Q9SCQ7|AN32_ARATH	54.3	6e-08	Acidic leucine-rich nuclear phosphoprotein 32-related protein OS=Arabidopsis thaliana GN=At3g50690 PE=2 SV=1	YLR106c	55.1	1e-07	COG5271	AAA ATPase containing von Willebrand factor type A (vWA) domain	K11323	8e-08	55.5	vcn:VOLCADRAFT_121342	histone arginine demethylase JMJD6 [EC:1.14.11.-]	-	-	-
CL1288.Contig2_All	379	6.8858	8.9304	9.1251	gi|218192912|gb|EEC75339.1|	50.4	8e-06	hypothetical protein OsI_11747 [Oryza sativa Indica Group]	gi|301154111|emb|FN396606.1|	65.9	3e-08	Musa balbisiana BAC contig MBP-32N20c, complete sequence	--	--	--	--	SPCC825.01	50.1	1e-06	COG0488	ATPase components of ABC transporters with duplicated ATPase domains	K11131	8e-07	50.1	vvi:100258019	H/ACA ribonucleoprotein complex subunit 4 [EC:5.4.99.-]	-	-	-
CL12971.Contig1_All	901	11.635	12.3076	12.4125	gi|255546295|ref|XP_002514207.1|	74.7	1e-12	conserved hypothetical protein [Ricinus communis] >gi|223546663|gb|EEF48161.1| conserved hypothetical protein [Ricinus communis]	gi|192336416|gb|EU830029.1|	63.9	3e-07	Linum usitatissimum clone LU0015B12 mRNA sequence	--	--	--	--	--	--	--	--	--	--	--	--	--	--	-	-	-
CL13019.Contig1_All	504	4.1249	3.5345	2.317	gi|351066165|gb|AEQ39057.1|	54.3	8e-07	putative SKP1-like protein 1 [Wolffia arrhiza]	gi|51292006|gb|AY702087.1|	85.7	4e-14	Nicotiana tabacum cultivar Samsun NN SKP1 (SKP1) mRNA, complete cds	sp|Q9FHW7|SKP1B_ARATH	52.4	1e-07	SKP1-like protein 1B OS=Arabidopsis thaliana GN=SKP1B PE=1 SV=1	--	--	--	--	--	K03094	4e-07	52.4	gmx:100809769	S-phase kinase-associated protein 1	-	-	-
CL13019.Contig2_All	563	4.8711	3.2432	3.0315	gi|224061857|ref|XP_002300633.1|	54.7	8e-07	predicted protein [Populus trichocarpa] >gi|222842359|gb|EEE79906.1| predicted protein [Populus trichocarpa]	gi|51292006|gb|AY702087.1|	85.7	4e-14	Nicotiana tabacum cultivar Samsun NN SKP1 (SKP1) mRNA, complete cds	sp|Q9FHW7|SKP1B_ARATH	52.4	2e-07	SKP1-like protein 1B OS=Arabidopsis thaliana GN=SKP1B PE=1 SV=1	--	--	--	--	--	K08852	2e-07	53.9	pop:POPTR_1079934	serine/threonine-protein kinase/endoribonuclease IRE1 [EC:2.7.11.1 3.1.26.-]	-	GO:0016772//transferase activity, transferring phosphorus-containing groups	-
CL13061.Contig2_All	482	4.772	7.7612	6.616	gi|225445334|ref|XP_002284790.1|	132.9	1e-30	PREDICTED: uncharacterized protein LOC100245830 [Vitis vinifera]	gi|399498640|gb|AC247108.1|	81.8	6e-13	Solanum lycopersicum strain Heinz 1706 chromosome 5 clone sle-40i5 map 5, complete sequence	--	--	--	--	--	--	--	--	--	--	--	--	--	--	-	-	-
CL13100.Contig1_All	378	0.234	0.3534	1.0694	--	--	--	--	--	--	--	--	--	--	--	--	--	--	--	--	--	--	--	--	--	--	-	-	-
CL13100.Contig2_All	338	0.2617	0.7906	0.5315	--	--	--	--	--	--	--	--	--	--	--	--	--	--	--	--	--	--	--	--	--	--	-	-	-
CL13126.Contig1_All	822	16.52	15.1158	16.8838	gi|225429940|ref|XP_002283869.1|	230.3	2e-59	PREDICTED: uncharacterized protein LOC100262893 [Vitis vinifera] >gi|296081849|emb|CBI20854.3| unnamed protein product [Vitis vinifera]	gi|225429939|ref|XM_002283833.1|	125	7e-26	PREDICTED: Vitis vinifera uncharacterized LOC100262893 (LOC100262893), mRNA	--	--	--	--	--	--	--	--	--	--	--	--	--	--	-	GO:0016772//transferase activity, transferring phosphorus-containing groups	GO:0009536//plastid
CL13126.Contig2_All	1057	14.0608	9.6063	9.6882	gi|225429940|ref|XP_002283869.1|	238.8	1e-61	PREDICTED: uncharacterized protein LOC100262893 [Vitis vinifera] >gi|296081849|emb|CBI20854.3| unnamed protein product [Vitis vinifera]	gi|225429939|ref|XM_002283833.1|	125	9e-26	PREDICTED: Vitis vinifera uncharacterized LOC100262893 (LOC100262893), mRNA	--	--	--	--	--	--	--	--	--	--	--	--	--	--	-	GO:0016301//kinase activity	GO:0009536//plastid
CL13408.Contig2_All	1737	7.1557	8.7941	9.1535	gi|297737957|emb|CBI27158.3|	126.3	1e-27	unnamed protein product [Vitis vinifera]	--	--	--	--	sp|P37707|B2_DAUCA	55.5	1e-07	B2 protein OS=Daucus carota PE=2 SV=1	--	--	--	--	--	--	--	--	--	--	-	-	GO:0044464//cell part
CL13560.Contig1_All	462	2.3936	0.482	0.6805	--	--	--	--	gi|3334753|emb|AJ007903.1|	79.8	2e-12	Nicotiana tabacum DNA adjacent to H9NP T-DNA left border	--	--	--	--	--	--	--	--	--	--	--	--	--	--	-	-	-
CL13854.Contig1_All	2382	20.2409	11.1804	9.5598	gi|255541374|ref|XP_002511751.1|	737.6	0	ATP binding protein, putative [Ricinus communis] >gi|223548931|gb|EEF50420.1| ATP binding protein, putative [Ricinus communis]	gi|357514724|ref|XM_003627603.1|	135	2e-28	Medicago truncatula Cysteine-rich receptor-like protein kinase (MTR_8g035560) mRNA, complete cds	sp|O64639|Y2559_ARATH	617	9e-177	Receptor-like serine/threonine-protein kinase At2g45590 OS=Arabidopsis thaliana GN=At2g45590 PE=2 SV=1	UU216	57	1e-07	COG0515	Serine/threonine protein kinase	K04733	8e-35	147	smo:SELMODRAFT_159261	interleukin-1 receptor-associated kinase 4 [EC:2.7.11.1]	GO:0016310//phosphorylation	GO:0004672//protein kinase activity;GO:0000166//nucleotide binding	-
CL13916.Contig1_All	1290	9.0866	8.8724	10.1666	gi|356555512|ref|XP_003546075.1|	174.5	3e-42	PREDICTED: F-box protein SKIP19-like [Glycine max]	--	--	--	--	sp|Q9M0U9|SKI19_ARATH	173	2e-43	F-box protein SKIP19 OS=Arabidopsis thaliana GN=SKIP19 PE=1 SV=1	--	--	--	--	--	--	--	--	--	--	-	-	-
CL13943.Contig2_All	1717	4.972	5.6025	4.787	gi|359491768|ref|XP_002267445.2|	120.9	2e-139	PREDICTED: uncharacterized protein LOC100242391 [Vitis vinifera]	gi|356522899|ref|XM_003530032.1|	133	6e-28	PREDICTED: Glycine max uncharacterized protein LOC100794860 (LOC100794860), mRNA	--	--	--	--	--	--	--	--	--	--	--	--	--	--	GO:0009750//response to fructose stimulus;GO:0009630//gravitropism;GO:0007186//G-protein coupled receptor signaling pathway;GO:0009749//response to glucose stimulus;GO:0009744//response to sucrose stimulus;GO:2000067//regulation of root morphogenesis;GO:0009652//thigmotropism;GO:0009737//response to abscisic acid stimulus;GO:0010555//response to mannitol stimulus;GO:0009723//response to ethylene …	GO:0004871//signal transducer activity;GO:0005515//protein binding;GO:0005525//GTP binding	GO:0031234//extrinsic to internal side of plasma membrane;GO:0005634//nucleus
CL140.Contig4_All	2087	2.6281	1.9632	2.2382	gi|359487856|ref|XP_003633666.1|	1124.8	0	PREDICTED: WD repeat-containing protein 48 homolog isoform 2 [Vitis vinifera]	gi|359487855|ref|XM_003633618.1|	591	1e-165	PREDICTED: Vitis vinifera WD repeat-containing protein 48 homolog, transcript variant 2 (LOC100248769), mRNA	sp|Q3Y8L7|WDR69_CHLRE	94	3e-19	Outer row dynein assembly protein 16 OS=Chlamydomonas reinhardtii GN=ODA16 PE=1 SV=1	all0438_2	99.4	2e-20	COG2319	FOG: WD40 repeat	K15361	0	1124	vvi:100248769	WD repeat-containing protein 48	GO:0016558//protein import into peroxisome matrix;GO:0010311//lateral root formation;GO:0006635//fatty acid beta-oxidation;GO:0006487//protein N-linked glycosylation	GO:0016905//myosin heavy chain kinase activity;GO:0000166//nucleotide binding	GO:0080008//Cul4-RING ubiquitin ligase complex;GO:0005634//nucleus
CL140.Contig5_All	1746	2.1787	2.8057	2.984	gi|298204931|emb|CBI34238.3|	225.3	0	unnamed protein product [Vitis vinifera]	gi|359487855|ref|XM_003633618.1|	494	1e-136	PREDICTED: Vitis vinifera WD repeat-containing protein 48 homolog, transcript variant 2 (LOC100248769), mRNA	sp|Q3Y8L7|WDR69_CHLRE	90.1	4e-18	Outer row dynein assembly protein 16 OS=Chlamydomonas reinhardtii GN=ODA16 PE=1 SV=1	all0438_2	96.7	1e-19	COG2319	FOG: WD40 repeat	K15361	0	702	vvi:100248769	WD repeat-containing protein 48	GO:0016558//protein import into peroxisome matrix;GO:0010311//lateral root formation;GO:0006635//fatty acid beta-oxidation;GO:0006487//protein N-linked glycosylation	GO:0016905//myosin heavy chain kinase activity;GO:0000166//nucleotide binding	GO:0080008//Cul4-RING ubiquitin ligase complex;GO:0005634//nucleus
CL140.Contig6_All	1743	1.6749	1.4308	1.5461	gi|298204931|emb|CBI34238.3|	225.3	0	unnamed protein product [Vitis vinifera]	gi|359487855|ref|XM_003633618.1|	492	1e-136	PREDICTED: Vitis vinifera WD repeat-containing protein 48 homolog, transcript variant 2 (LOC100248769), mRNA	sp|Q3Y8L7|WDR69_CHLRE	94.7	1e-19	Outer row dynein assembly protein 16 OS=Chlamydomonas reinhardtii GN=ODA16 PE=1 SV=1	all0438_2	96.3	2e-19	COG2319	FOG: WD40 repeat	K15361	0	710	vvi:100248769	WD repeat-containing protein 48	GO:0016558//protein import into peroxisome matrix;GO:0010311//lateral root formation;GO:0006635//fatty acid beta-oxidation;GO:0006487//protein N-linked glycosylation	GO:0016905//myosin heavy chain kinase activity;GO:0000166//nucleotide binding	GO:0080008//Cul4-RING ubiquitin ligase complex;GO:0005634//nucleus
CL1402.Contig3_All	1467	13.6287	10.443	11.1444	gi|225436892|ref|XP_002273759.1|	312.4	1e-83	PREDICTED: uncharacterized protein LOC100252855 [Vitis vinifera]	gi|241990494|dbj|AK330651.1|	73.8	4e-10	Triticum aestivum cDNA, clone: SET4_P14, cultivar: Chinese Spring	sp|P08297|NO75_SOYBN	60.5	2e-09	Early nodulin-75 OS=Glycine max GN=ENOD2A PE=2 SV=2	YGR189c	56.2	1e-07	COG2273	Beta-glucanase/Beta-glucan synthetase	K11323	1e-12	72.8	vcn:VOLCADRAFT_121342	histone arginine demethylase JMJD6 [EC:1.14.11.-]	-	-	-
CL14182.Contig1_All	584	2.2722	1.6777	0.9998	gi|225464136|ref|XP_002266672.1|	200.3	1e-50	PREDICTED: aspartyl aminopeptidase [Vitis vinifera] >gi|296087973|emb|CBI35256.3| unnamed protein product [Vitis vinifera]	gi|225464135|ref|XM_002266636.1|	151	9e-34	PREDICTED: Vitis vinifera aspartyl aminopeptidase-like (LOC100265348), mRNA	sp|B9RAJ0|DNPEP_RICCO	117	6e-27	Probable aspartyl aminopeptidase OS=Ricinus communis GN=RCOM_1506700 PE=2 SV=2	SPAC4F10.02	96.7	2e-20	COG1362	Aspartyl aminopeptidase	K01267	1e-51	200	vvi:100265348	aspartyl aminopeptidase [EC:3.4.11.21]	GO:0006468//protein phosphorylation;GO:0006508//proteolysis	GO:0004177//aminopeptidase activity;GO:0005524//ATP binding;GO:0008270//zinc ion binding;GO:0008237//metallopeptidase activity;GO:0004674//protein serine/threonine kinase activity	GO:0005773//vacuole;GO:0009570//chloroplast stroma;GO:0005739//mitochondrion
CL14232.Contig1_All	1042	9.1692	6.3255	7.8449	gi|297740759|emb|CBI30941.3|	352.4	6e-96	unnamed protein product [Vitis vinifera]	gi|356528223|ref|XM_003532657.1|	95.6	8e-17	PREDICTED: Glycine max uncharacterized protein LOC100803736 (LOC100803736), mRNA	--	--	--	--	--	--	--	--	--	--	--	--	--	--	GO:0045892//negative regulation of transcription, DNA-dependent;GO:0042023//DNA endoreduplication	GO:0030371//translation repressor activity;GO:0005488//binding	GO:0009524//phragmoplast;GO:0005829//cytosol;GO:0005634//nucleus
CL14297.Contig2_All	856	14.6237	25.8051	35.8894	--	--	--	--	--	--	--	--	--	--	--	--	--	--	--	--	--	--	--	--	--	--	-	-	-
CL14308.Contig1_All	337	3.9376	3.1716	5.8642	gi|224125344|ref|XP_002329782.1|	67	8e-11	predicted protein [Populus trichocarpa] >gi|222870844|gb|EEF07975.1| predicted protein [Populus trichocarpa]	--	--	--	--	sp|Q9S9U1|LRK71_ARATH	53.9	2e-08	L-type lectin-domain containing receptor kinase VII.1 OS=Arabidopsis thaliana GN=LECRK71 PE=2 SV=1	PA1297	47	9e-06	COG1230	Co/Zn/Cd efflux system component	K03189	2e-06	48.5	gmx:547551	urease accessory protein	GO:0016310//phosphorylation	GO:0004672//protein kinase activity;GO:0000166//nucleotide binding	-
CL14308.Contig2_All	411	5.1659	6.3931	8.7424	gi|224125344|ref|XP_002329782.1|	65.1	3e-10	predicted protein [Populus trichocarpa] >gi|222870844|gb|EEF07975.1| predicted protein [Populus trichocarpa]	--	--	--	--	sp|Q9S9U1|LRK71_ARATH	53.1	5e-08	L-type lectin-domain containing receptor kinase VII.1 OS=Arabidopsis thaliana GN=LECRK71 PE=2 SV=1	PA1297	50.1	1e-06	COG1230	Co/Zn/Cd efflux system component	K03189	2e-06	48.9	gmx:547551	urease accessory protein	GO:0044238//primary metabolic process;GO:0016310//phosphorylation	GO:0004672//protein kinase activity;GO:0000166//nucleotide binding	-
CL1437.Contig9_All	1042	6.1977	5.2997	5.7328	gi|115464383|ref|NP_001055791.1|	75.1	1e-12	Os05g0467300 [Oryza sativa Japonica Group] >gi|113579342|dbj|BAF17705.1| Os05g0467300 [Oryza sativa Japonica Group]	--	--	--	--	sp|Q8H0T4|UPL2_ARATH	55.8	4e-08	E3 ubiquitin-protein ligase UPL2 OS=Arabidopsis thaliana GN=UPL2 PE=1 SV=3	YOR054c	80.5	4e-15	COG0452	Phosphopantothenoylcysteine synthetase/decarboxylase	K11323	3e-11	67.8	vcn:VOLCADRAFT_121342	histone arginine demethylase JMJD6 [EC:1.14.11.-]	-	GO:0005488//binding;GO:0016491//oxidoreductase activity	GO:0043231//intracellular membrane-bounded organelle
CL14386.Contig1_All	969	6.0712	4.55	4.5424	gi|255580114|ref|XP_002530889.1|	295.8	6e-79	conserved hypothetical protein [Ricinus communis] >gi|223529542|gb|EEF31495.1| conserved hypothetical protein [Ricinus communis]	gi|356503778|ref|XM_003520633.1|	67.9	2e-08	PREDICTED: Glycine max protein ROS1-like (LOC100787368), mRNA	sp|Q9SR66|DML2_ARATH	281	3e-76	DEMETER-like protein 2 OS=Arabidopsis thaliana GN=DML2 PE=2 SV=2	DR2438	75.1	2e-13	COG0177	Predicted EndoIII-related endonuclease	K10773	1e-14	79	ppp:PHYPADRAFT_173765	endonuclease III [EC:4.2.99.18]	GO:0006284//base-excision repair;GO:0006349//regulation of gene expression by genetic imprinting;GO:0006306//DNA methylation;GO:0009793//embryo development ending in seed dormancy	GO:0003906//DNA-(apurinic or apyrimidinic site) lyase activity;GO:0019104//DNA N-glycosylase activity	GO:0043078//polar nucleus
CL14408.Contig1_All	1254	7.8307	8.4168	6.7336	gi|255543198|ref|XP_002512662.1|	367.9	1e-100	ATP binding protein, putative [Ricinus communis] >gi|223548623|gb|EEF50114.1| ATP binding protein, putative [Ricinus communis]	gi|224072474|ref|XM_002303714.1|	61.9	1e-06	Populus trichocarpa predicted protein, mRNA	sp|Q9LYU7|CRN_ARATH	325	3e-89	Inactive leucine-rich repeat receptor-like protein kinase CORYNE OS=Arabidopsis thaliana GN=CRN PE=1 SV=1	slr0152	64.7	3e-10	COG0515	Serine/threonine protein kinase	K13415	4e-29	127	osa:4324691	protein brassinosteroid insensitive 1 [EC:2.7.10.1 2.7.11.1]	GO:0006406//mRNA export from nucleus;GO:0009965//leaf morphogenesis;GO:0016570//histone modification;GO:0048481//ovule development;GO:0048765//root hair cell differentiation;GO:0010082//regulation of root meristem growth;GO:0010074//maintenance of meristem identity;GO:0048449//floral organ formation;GO:0010090//trichome morphogenesis;GO:0016310//phosphorylation;GO:0010014//meristem initiation;GO:…	GO:0004672//protein kinase activity;GO:0019900//kinase binding;GO:0033612//receptor serine/threonine kinase binding	GO:0005886//plasma membrane;GO:0005737//cytoplasm
CL14521.Contig1_All	690	7.7568	6.1961	4.4914	gi|255542056|ref|XP_002512092.1|	194.5	1e-48	conserved hypothetical protein [Ricinus communis] >gi|223549272|gb|EEF50761.1| conserved hypothetical protein [Ricinus communis]	gi|359472529|ref|XM_003631113.1|	81.8	8e-13	PREDICTED: Vitis vinifera uncharacterized LOC100853084 (LOC100853084), mRNA	--	--	--	--	--	--	--	--	--	--	--	--	--	--	GO:0006355//regulation of transcription, DNA-dependent;GO:0006626//protein targeting to mitochondrion	-	GO:0043189//H4/H2A histone acetyltransferase complex
CL14521.Contig2_All	261	7.7958	5.9721	5.8509	gi|255542056|ref|XP_002512092.1|	97.1	7e-20	conserved hypothetical protein [Ricinus communis] >gi|223549272|gb|EEF50761.1| conserved hypothetical protein [Ricinus communis]	gi|110797109|gb|AC189429.1|	71.9	3e-10	Brassica rapa subsp. pekinensis clone KBrB066M16, complete sequence	--	--	--	--	--	--	--	--	--	--	--	--	--	--	GO:0006355//regulation of transcription, DNA-dependent;GO:0006626//protein targeting to mitochondrion	-	GO:0043189//H4/H2A histone acetyltransferase complex
CL14534.Contig2_All	911	8.3513	7.9195	7.1981	gi|356561992|ref|XP_003549259.1|	67.8	2e-10	PREDICTED: LOW QUALITY PROTEIN: 14-3-3-like protein-like [Glycine max]	gi|332189094|gb|CP002684.1|	91.7	1e-15	Arabidopsis thaliana chromosome 1, complete sequence	sp|P46266|1433_PEA	66.2	2e-11	14-3-3-like protein OS=Pisum sativum PE=2 SV=1	SPAC17A2.13c	57.4	3e-08	COG5040	14-3-3 family protein	K06630	1e-10	65.5	mtr:MTR_3g099380	tyrosine 3-monooxygenase/tryptophan 5-monooxygenase activation protein	-	-	-
CL14619.Contig1_All	3075	8.2568	8.6173	11.1738	gi|359482963|ref|XP_003632867.1|	1046.6	0	PREDICTED: polyphosphoinositide phosphatase-like isoform 1 [Vitis vinifera]	gi|359482964|ref|XM_003632820.1|	222	2e-54	PREDICTED: Vitis vinifera polyphosphoinositide phosphatase-like, transcript variant 2 (LOC100249754), mRNA	--	--	--	--	YNL325c	370	8e-102	COG5329	Phosphoinositide polyphosphatase (Sac family)	--	--	--	--	--	GO:0045492//xylan biosynthetic process;GO:0046855//inositol phosphate dephosphorylation;GO:0010413//glucuronoxylan metabolic process;GO:0032957//inositol trisphosphate metabolic process	GO:0004439//phosphatidylinositol-4,5-bisphosphate 5-phosphatase activity	GO:0005634//nucleus
CL14619.Contig2_All	3680	18.0417	19.5444	20.6264	gi|359482963|ref|XP_003632867.1|	1016.9	0	PREDICTED: polyphosphoinositide phosphatase-like isoform 1 [Vitis vinifera]	gi|359482964|ref|XM_003632820.1|	218	3e-53	PREDICTED: Vitis vinifera polyphosphoinositide phosphatase-like, transcript variant 2 (LOC100249754), mRNA	sp|Q8W487|YB95_ARATH	204	2e-52	Uncharacterized protein At2g39795, mitochondrial OS=Arabidopsis thaliana GN=At2g39795 PE=1 SV=1	YNL325c	382	3e-105	COG5329	Phosphoinositide polyphosphatase (Sac family)	K15414	2e-70	266	vvi:100266772	complement component 1 Q subcomponent-binding protein, mitochondrial	GO:0046855//inositol phosphate dephosphorylation;GO:0032957//inositol trisphosphate metabolic process	GO:0004439//phosphatidylinositol-4,5-bisphosphate 5-phosphatase activity	GO:0005634//nucleus
CL14676.Contig1_All	903	1.4205	1.3809	1.8403	gi|147819688|emb|CAN76392.1|	73.9	3e-12	hypothetical protein VITISV_011465 [Vitis vinifera]	--	--	--	--	sp|Q9SZ05|Y3440_ARATH	76.6	2e-14	B3 domain-containing protein At4g34400 OS=Arabidopsis thaliana GN=At4g34400 PE=2 SV=2	--	--	--	--	--	--	--	--	--	--	GO:0006355//regulation of transcription, DNA-dependent	-	-
CL14676.Contig2_All	959	1.6605	2.2291	2.5291	gi|147819688|emb|CAN76392.1|	73.9	3e-12	hypothetical protein VITISV_011465 [Vitis vinifera]	--	--	--	--	sp|Q9SZ05|Y3440_ARATH	76.6	2e-14	B3 domain-containing protein At4g34400 OS=Arabidopsis thaliana GN=At4g34400 PE=2 SV=2	--	--	--	--	--	--	--	--	--	--	GO:0006355//regulation of transcription, DNA-dependent	-	-
CL14735.Contig1_All	1289	7.7553	8.6374	7.1431	gi|225435975|ref|XP_002271328.1|	328.9	9e-89	PREDICTED: oligoribonuclease [Vitis vinifera] >gi|296083947|emb|CBI24335.3| unnamed protein product [Vitis vinifera]	gi|403044267|ref|NM_001251613.2|	172	5e-40	Glycine max uncharacterized LOC100527858 (LOC100527858), mRNA	sp|Q9ZVE0|ORN_ARATH	291	4e-79	Oligoribonuclease OS=Arabidopsis thaliana GN=At2g26970 PE=2 SV=2	PM0900	161	3e-39	COG1949	Oligoribonuclease (3'->5' exoribonuclease)	K13288	9e-90	328	vvi:100251263	oligoribonuclease [EC:3.1.-.-]	-	GO:0003676//nucleic acid binding;GO:0004527//exonuclease activity	GO:0005622//intracellular
CL14735.Contig2_All	1142	7.1268	8.2284	7.2366	gi|225435975|ref|XP_002271328.1|	328.9	8e-89	PREDICTED: oligoribonuclease [Vitis vinifera] >gi|296083947|emb|CBI24335.3| unnamed protein product [Vitis vinifera]	gi|403044267|ref|NM_001251613.2|	172	5e-40	Glycine max uncharacterized LOC100527858 (LOC100527858), mRNA	sp|Q9ZVE0|ORN_ARATH	291	4e-79	Oligoribonuclease OS=Arabidopsis thaliana GN=At2g26970 PE=2 SV=2	PM0900	161	2e-39	COG1949	Oligoribonuclease (3'->5' exoribonuclease)	K13288	8e-90	328	vvi:100251263	oligoribonuclease [EC:3.1.-.-]	-	GO:0003676//nucleic acid binding;GO:0004527//exonuclease activity	GO:0005622//intracellular
CL14767.Contig1_All	1254	30.6173	33.4898	28.4744	gi|356511820|ref|XP_003524620.1|	331.3	1e-89	PREDICTED: uncharacterized protein LOC100781353 [Glycine max]	gi|1778377|gb|U81289.1|PSU81289	67.9	2e-08	Pisum sativum NAP1Ps mRNA, complete cds	sp|Q8H0U8|RH42_ARATH	59.7	3e-09	DEAD-box ATP-dependent RNA helicase 42 OS=Arabidopsis thaliana GN=RH42 PE=1 SV=2	L25762_1	63.2	9e-10	COG5283	Phage-related tail protein	K12811	3e-10	64.7	pop:POPTR_1070855	ATP-dependent RNA helicase DDX46/PRP5 [EC:3.6.4.13]	-	-	-
CL14806.Contig2_All	1855	21.3891	18.4381	19.3458	gi|255582034|ref|XP_002531814.1|	372.5	1e-101	zinc finger protein, putative [Ricinus communis] >gi|223528548|gb|EEF30571.1| zinc finger protein, putative [Ricinus communis]	gi|297810198|ref|XM_002872937.1|	69.9	9e-09	Arabidopsis lyrata subsp. lyrata zinc finger family protein, mRNA	sp|Q9SPL2|CIP8_ARATH	122	7e-28	E3 ubiquitin-protein ligase CIP8 OS=Arabidopsis thaliana GN=CIP8 PE=1 SV=1	SPAC144.05	55.1	4e-07	COG0553	Superfamily II DNA/RNA helicases, SNF2 family	K11982	2e-24	112	mtr:MTR_6g079660	E3 ubiquitin-protein ligase RNF115/126 [EC:6.3.2.19]	-	GO:0046872//metal ion binding	-
CL14828.Contig2_All	252	2.8084	7.5992	4.0993	gi|326517186|dbj|BAJ99959.1|	68.6	2e-11	predicted protein [Hordeum vulgare subsp. vulgare]	--	--	--	--	--	--	--	--	--	--	--	--	--	--	--	--	--	--	-	-	-
CL1489.Contig9_All	572	13.0688	20.8659	12.1708	gi|388495940|gb|AFK36036.1|	226.1	2e-58	unknown [Medicago truncatula]	gi|151564659|gb|EF694979.1|	256	2e-65	Arnebia euchroma histone H2B (H2B) mRNA, partial cds	sp|O49118|H2B_CAPAN	226	9e-60	Histone H2B OS=Capsicum annuum GN=HIS2B PE=2 SV=3	--	--	--	--	--	K11252	3e-59	225	gmx:100305731	histone H2B	GO:0006334//nucleosome assembly	GO:0003677//DNA binding	GO:0000786//nucleosome;GO:0005634//nucleus
CL14939.Contig2_All	656	3.2365	2.1045	1.5747	gi|225464551|ref|XP_002272741.1|	166.4	2e-40	PREDICTED: prolyl-tRNA synthetase-like [Vitis vinifera]	gi|357465364|ref|XM_003602916.1|	167	2e-38	Medicago truncatula Prolyl-tRNA synthetase (MTR_3g100910) mRNA, complete cds	--	--	--	--	ML1553	91.3	1e-18	COG0442	Prolyl-tRNA synthetase	K01881	3e-41	166	vvi:100262997	prolyl-tRNA synthetase [EC:6.1.1.15]	GO:0016226//iron-sulfur cluster assembly;GO:0010109//regulation of photosynthesis;GO:0009553//embryo sac development;GO:0010027//thylakoid membrane organization;GO:0010228//vegetative to reproductive phase transition of meristem;GO:0009658//chloroplast organization;GO:0048481//ovule development;GO:0006418//tRNA aminoacylation for protein translation;GO:0009793//embryo development ending in seed d…	GO:0005524//ATP binding;GO:0004812//aminoacyl-tRNA ligase activity	GO:0005739//mitochondrion;GO:0009570//chloroplast stroma
CL14947.Contig2_All	1756	10.9574	11.7423	10.8449	gi|225464938|ref|XP_002275366.1|	676	0	PREDICTED: heterogeneous nuclear ribonucleoprotein Q-like [Vitis vinifera]	gi|357511098|ref|XM_003625790.1|	167	5e-38	Medicago truncatula RNA-binding protein (MTR_7g104800) mRNA, complete cds	sp|P42731|PABP2_ARATH	91.7	1e-18	Polyadenylate-binding protein 2 OS=Arabidopsis thaliana GN=PAB2 PE=1 SV=1	XF1267	77	9e-14	COG5297	Cellobiohydrolase A (1,4-beta-cellobiosidase A)	K11323	2e-20	99	vcn:VOLCADRAFT_121342	histone arginine demethylase JMJD6 [EC:1.14.11.-]	-	GO:0003723//RNA binding;GO:0000166//nucleotide binding	GO:0005829//cytosol
CL14966.Contig1_All	225	3.7352	2.3752	3.3935	--	--	--	--	--	--	--	--	--	--	--	--	--	--	--	--	--	--	--	--	--	--	-	-	-
CL14966.Contig2_All	854	10.0482	5.9971	5.4697	--	--	--	--	--	--	--	--	--	--	--	--	--	--	--	--	--	--	--	--	--	--	-	-	-
CL14985.Contig1_All	1556	1.8762	3.0625	3.3484	gi|224060209|ref|XP_002300086.1|	106.3	2e-50	global transcription factor group [Populus trichocarpa] >gi|222847344|gb|EEE84891.1| global transcription factor group [Populus trichocarpa]	gi|224121913|ref|XM_002318668.1|	125	1e-25	Populus trichocarpa global transcription factor group (GTE913), mRNA	sp|Q93ZB7|GTE11_ARATH	118	1e-26	Transcription factor GTE11 OS=Arabidopsis thaliana GN=GTE11 PE=1 SV=1	--	--	--	--	--	--	--	--	--	--	GO:0048573//photoperiodism, flowering;GO:0016573//histone acetylation;GO:0045893//positive regulation of transcription, DNA-dependent	GO:0003677//DNA binding;GO:0005515//protein binding;GO:0004402//histone acetyltransferase activity	GO:0005634//nucleus
CL14985.Contig3_All	1586	2.6774	4.7455	5.6638	gi|224121914|ref|XP_002318704.1|	30.4	9e-63	global transcription factor group [Populus trichocarpa] >gi|222859377|gb|EEE96924.1| global transcription factor group [Populus trichocarpa]	gi|158749690|gb|AC213420.1|	93.7	5e-16	Populus trichocarpa clone POP033-D24, complete sequence	sp|Q93ZB7|GTE11_ARATH	183	1e-47	Transcription factor GTE11 OS=Arabidopsis thaliana GN=GTE11 PE=1 SV=1	--	--	--	--	--	K11323	9e-07	53.5	vcn:VOLCADRAFT_121342	histone arginine demethylase JMJD6 [EC:1.14.11.-]	GO:0048573//photoperiodism, flowering;GO:0045893//positive regulation of transcription, DNA-dependent	GO:0016746//transferase activity, transferring acyl groups;GO:0003677//DNA binding;GO:0005515//protein binding	GO:0005634//nucleus
CL15003.Contig1_All	2076	16.4701	11.0264	8.4593	gi|255578860|ref|XP_002530284.1|	784.3	0	protein disulfide isomerase, putative [Ricinus communis] >gi|223530182|gb|EEF32091.1| protein disulfide isomerase, putative [Ricinus communis]	gi|359478341|ref|XM_002285100.2|	192	1e-45	PREDICTED: Vitis vinifera protein disulfide isomerase-like 1-4, transcript variant 1 (LOC100246809), mRNA	sp|Q9FF55|PDI14_ARATH	714	0	Protein disulfide isomerase-like 1-4 OS=Arabidopsis thaliana GN=PDIL1-4 PE=1 SV=1	SPAC1F5.02	242	2e-63	COG0526	Thiol-disulfide isomerase and thioredoxins	K09580	0	784	rcu:RCOM_0154150	protein disulfide-isomerase A1 [EC:5.3.4.1]	GO:0006979//response to oxidative stress;GO:0006662//glycerol ether metabolic process;GO:0030244//cellulose biosynthetic process;GO:0045454//cell redox homeostasis;GO:0006499//N-terminal protein myristoylation;GO:0048193//Golgi vesicle transport	GO:0003756//protein disulfide isomerase activity;GO:0009055//electron carrier activity;GO:0004579//dolichyl-diphosphooligosaccharide-protein glycotransferase activity;GO:0015035//protein disulfide oxidoreductase activity	GO:0005739//mitochondrion;GO:0005774//vacuolar membrane;GO:0005576//extracellular region;GO:0009507//chloroplast;GO:0005794//Golgi apparatus;GO:0005783//endoplasmic reticulum
CL15003.Contig2_All	2171	16.9922	10.9132	10.3235	gi|255578860|ref|XP_002530284.1|	785.4	0	protein disulfide isomerase, putative [Ricinus communis] >gi|223530182|gb|EEF32091.1| protein disulfide isomerase, putative [Ricinus communis]	gi|359478341|ref|XM_002285100.2|	192	1e-45	PREDICTED: Vitis vinifera protein disulfide isomerase-like 1-4, transcript variant 1 (LOC100246809), mRNA	sp|Q9FF55|PDI14_ARATH	714	0	Protein disulfide isomerase-like 1-4 OS=Arabidopsis thaliana GN=PDIL1-4 PE=1 SV=1	SPAC1F5.02	238	2e-62	COG0526	Thiol-disulfide isomerase and thioredoxins	K09580	0	785	rcu:RCOM_0154150	protein disulfide-isomerase A1 [EC:5.3.4.1]	GO:0006979//response to oxidative stress;GO:0006662//glycerol ether metabolic process;GO:0030244//cellulose biosynthetic process;GO:0045454//cell redox homeostasis;GO:0006499//N-terminal protein myristoylation;GO:0048193//Golgi vesicle transport	GO:0003756//protein disulfide isomerase activity;GO:0009055//electron carrier activity;GO:0004579//dolichyl-diphosphooligosaccharide-protein glycotransferase activity;GO:0015035//protein disulfide oxidoreductase activity	GO:0005739//mitochondrion;GO:0005774//vacuolar membrane;GO:0005576//extracellular region;GO:0009507//chloroplast;GO:0005794//Golgi apparatus;GO:0005783//endoplasmic reticulum
CL15007.Contig2_All	2044	16.0571	29.3484	35.2898	gi|255540259|ref|XP_002511194.1|	573.9	3e-162	AMP-activated protein kinase, gamma regulatory subunit, putative [Ricinus communis] >gi|223550309|gb|EEF51796.1| AMP-activated protein kinase, gamma regulatory subunit, putative [Ricinus communis]	gi|225312771|dbj|AK320114.1|	123	7e-25	Solanum lycopersicum cDNA, clone: LEFL1005BA08, HTC in leaf	sp|Q8LBB2|KING1_ARATH	505	4e-143	SNF1-related protein kinase regulatory subunit gamma-1 OS=Arabidopsis thaliana GN=KING1 PE=1 SV=2	AF0848	55.8	3e-07	COG0517	FOG: CBS domain	--	--	--	--	--	GO:0016310//phosphorylation	GO:0016301//kinase activity	GO:0009505//plant-type cell wall
CL15030.Contig2_All	233	3.2273	2.1025	2.1204	--	--	--	--	--	--	--	--	--	--	--	--	--	--	--	--	--	--	--	--	--	--	-	-	-
CL15040.Contig1_All	2973	16.2618	13.8862	13.4607	gi|147814937|emb|CAN74744.1|	1419.5	0	hypothetical protein VITISV_033250 [Vitis vinifera]	gi|225442836|ref|XM_002285303.1|	825	0	PREDICTED: Vitis vinifera periodic tryptophan protein 2 homolog (LOC100241131), mRNA	sp|Q3Y8L7|WDR69_CHLRE	113	7e-25	Outer row dynein assembly protein 16 OS=Chlamydomonas reinhardtii GN=ODA16 PE=1 SV=1	all0283_3	141	6e-33	COG2319	FOG: WD40 repeat	K14558	0	1406	pop:POPTR_751482	periodic tryptophan protein 2	GO:0001510//RNA methylation;GO:0006606//protein import into nucleus;GO:0009220//pyrimidine ribonucleotide biosynthetic process;GO:0006406//mRNA export from nucleus	GO:0016905//myosin heavy chain kinase activity;GO:0000166//nucleotide binding	GO:0080008//Cul4-RING ubiquitin ligase complex;GO:0005634//nucleus
CL15075.Contig1_All	1515	29.6345	38.8025	45.9816	gi|12003394|gb|AAG43554.1|AF211536_1	478	1e-133	Avr9/Cf-9 rapidly elicited protein 231 [Nicotiana tabacum]	gi|332071124|gb|GU997657.1|	190	3e-45	Panax notoginseng clone 02051n glycosyltransferase mRNA, complete cds	sp|Q9LHD2|GATLA_ARATH	452	3e-127	Probable galacturonosyltransferase-like 10 OS=Arabidopsis thaliana GN=GATL10 PE=2 SV=1	PM1139	69.7	1e-11	COG1442	Lipopolysaccharide biosynthesis proteins, LPS:glycosyltransferases	K13648	4e-22	104	gmx:100805886	alpha-1,4-galacturonosyltransferase [EC:2.4.1.43]	GO:0035556//intracellular signal transduction;GO:0030968//endoplasmic reticulum unfolded protein response;GO:0006979//response to oxidative stress;GO:0016051//carbohydrate biosynthetic process;GO:0009738//abscisic acid mediated signaling pathway	GO:0047262//polygalacturonate 4-alpha-galacturonosyltransferase activity	GO:0005794//Golgi apparatus
CL15075.Contig2_All	249	5.6845	7.333	6.3133	--	--	--	--	--	--	--	--	--	--	--	--	--	--	--	--	--	--	--	--	--	--	-	-	-
CL15100.Contig1_All	593	2.7599	11.7908	10.9824	gi|255575029|ref|XP_002528420.1|	131	1e-29	hypothetical protein RCOM_0615680 [Ricinus communis] >gi|223532156|gb|EEF33962.1| hypothetical protein RCOM_0615680 [Ricinus communis]	--	--	--	--	--	--	--	--	--	--	--	--	--	K11323	6e-08	55.5	vcn:VOLCADRAFT_121342	histone arginine demethylase JMJD6 [EC:1.14.11.-]	-	-	GO:0044464//cell part
CL15194.Contig1_All	1075	3.7444	3.3971	3.3842	gi|303291027|ref|XP_003064800.1|	54.7	2e-06	predicted protein [Micromonas pusilla CCMP1545] >gi|226453826|gb|EEH51134.1| predicted protein [Micromonas pusilla CCMP1545]	--	--	--	--	--	--	--	--	--	--	--	--	--	--	--	--	--	--	-	-	-
CL15194.Contig2_All	755	1.3475	0.8848	0.7734	gi|308806688|ref|XP_003080655.1|	53.9	2e-06	Chromatin-associated protein Dek and related proteins, contains SAP DNA binding domain (ISS) [Ostreococcus tauri] >gi|116059116|emb|CAL54823.1| Chromatin-associated protein Dek and related proteins, contains SAP DNA binding domain (ISS) [Ostreococcus tauri]	--	--	--	--	--	--	--	--	--	--	--	--	--	K10754	6e-06	49.3	cre:CHLREDRAFT_150793	replication factor C subunit 1	-	-	-
CL15194.Contig3_All	1111	4.4989	4.7701	4.0023	gi|303291027|ref|XP_003064800.1|	58.2	2e-07	predicted protein [Micromonas pusilla CCMP1545] >gi|226453826|gb|EEH51134.1| predicted protein [Micromonas pusilla CCMP1545]	--	--	--	--	--	--	--	--	--	--	--	--	--	--	--	--	--	--	-	-	-
CL15212.Contig1_All	313	3.109	2.7034	3.3004	--	--	--	--	--	--	--	--	--	--	--	--	--	--	--	--	--	--	--	--	--	--	-	-	-
CL154.Contig12_All	924	5.6009	4.6752	5.2497	--	--	--	--	--	--	--	--	--	--	--	--	--	--	--	--	--	--	--	--	--	--	-	-	-
CL154.Contig13_All	887	4.0393	6.3764	7.1903	--	--	--	--	--	--	--	--	--	--	--	--	--	--	--	--	--	--	--	--	--	--	-	-	-
CL15404.Contig1_All	416	4.0405	3.4257	3.347	gi|218198623|gb|EEC81050.1|	58.5	3e-08	hypothetical protein OsI_23843 [Oryza sativa Indica Group]	--	--	--	--	--	--	--	--	PA1297	47.4	8e-06	COG1230	Co/Zn/Cd efflux system component	K03189	1e-06	50.1	vvi:100243473	urease accessory protein	-	-	-
CL15404.Contig2_All	462	9.5742	5.3981	5.833	gi|218198623|gb|EEC81050.1|	53.9	8e-07	hypothetical protein OsI_23843 [Oryza sativa Indica Group]	--	--	--	--	--	--	--	--	--	--	--	--	--	K03189	3e-06	49.3	vvi:100243473	urease accessory protein	-	-	-
CL15404.Contig3_All	556	7.876	3.6845	2.6658	gi|218198623|gb|EEC81050.1|	53.1	2e-06	hypothetical protein OsI_23843 [Oryza sativa Indica Group]	--	--	--	--	--	--	--	--	--	--	--	--	--	K03189	3e-07	52.8	vvi:100243473	urease accessory protein	-	-	-
CL15448.Contig3_All	1042	8.1928	8.5907	10.776	gi|255548806|ref|XP_002515459.1|	115.5	1e-24	conserved hypothetical protein [Ricinus communis] >gi|223545403|gb|EEF46908.1| conserved hypothetical protein [Ricinus communis]	--	--	--	--	--	--	--	--	--	--	--	--	--	--	--	--	--	--	-	-	-
CL15631.Contig1_All	685	1.4852	1.8204	1.6392	gi|225461679|ref|XP_002283164.1|	265	6e-70	PREDICTED: uncharacterized protein LOC100248749 [Vitis vinifera]	gi|239500638|dbj|AP011511.1|	103	2e-19	Brassica rapa subsp. pekinensis DNA, chromosome: Linkage group A5, BAC clone: KBrB021M21, complete sequence	sp|Q9LK58|PP225_ARATH	60.5	9e-10	Pentatricopeptide repeat-containing protein At3g13150 OS=Arabidopsis thaliana GN=At3g13150 PE=2 SV=1	YOR054c	67	3e-11	COG0452	Phosphopantothenoylcysteine synthetase/decarboxylase	K11323	8e-15	78.6	vcn:VOLCADRAFT_121342	histone arginine demethylase JMJD6 [EC:1.14.11.-]	GO:0009790//embryo development	-	GO:0009507//chloroplast
CL15631.Contig2_All	712	2.485	2.8147	2.5233	gi|225461679|ref|XP_002283164.1|	281.2	9e-75	PREDICTED: uncharacterized protein LOC100248749 [Vitis vinifera]	gi|239500638|dbj|AP011511.1|	127	2e-26	Brassica rapa subsp. pekinensis DNA, chromosome: Linkage group A5, BAC clone: KBrB021M21, complete sequence	sp|Q9LK58|PP225_ARATH	52.8	2e-07	Pentatricopeptide repeat-containing protein At3g13150 OS=Arabidopsis thaliana GN=At3g13150 PE=2 SV=1	YOR054c	59.7	5e-09	COG0452	Phosphopantothenoylcysteine synthetase/decarboxylase	K11323	2e-13	73.9	vcn:VOLCADRAFT_121342	histone arginine demethylase JMJD6 [EC:1.14.11.-]	GO:0009790//embryo development	-	GO:0009507//chloroplast
CL15684.Contig2_All	1564	11.9067	15.5188	20.8777	--	--	--	--	gi|323500674|gb|HQ222360.1|	77.8	3e-11	Helianthus annuus cultivar HA383 clone BAC P339N08, complete sequence	--	--	--	--	--	--	--	--	--	--	--	--	--	--	-	-	-
CL15689.Contig2_All	1119	1.1463	0.9552	1.2844	gi|225462238|ref|XP_002263178.1|	52	1e-60	PREDICTED: ATP-dependent zinc metalloprotease FTSH 12, chloroplastic-like [Vitis vinifera]	gi|225431468|ref|XM_002274301.1|	147	3e-32	PREDICTED: Vitis vinifera callose synthase 5-like (LOC100248918), mRNA	sp|Q9SAJ3|FTSHC_ARATH	124	2e-61	ATP-dependent zinc metalloprotease FTSH 12, chloroplastic OS=Arabidopsis thaliana GN=FTSH12 PE=2 SV=2	--	--	--	--	--	K03798	1e-61	130	vvi:100244978	cell division protease FtsH [EC:3.4.24.-]	GO:0010584//pollen exine formation;GO:0009827//plant-type cell wall modification;GO:0009793//embryo development ending in seed dormancy;GO:0009846//pollen germination;GO:0010304//PSII associated light-harvesting complex II catabolic process;GO:0009556//microsporogenesis;GO:0006075//(1->3)-beta-D-glucan biosynthetic process;GO:0009658//chloroplast organization;GO:0080092//regulation of pollen tube…	GO:0030170//pyridoxal phosphate binding;GO:0008237//metallopeptidase activity;GO:0042623//ATPase activity, coupled;GO:0003843//1,3-beta-D-glucan synthase activity	GO:0009941//chloroplast envelope;GO:0000148//1,3-beta-D-glucan synthase complex;GO:0005739//mitochondrion
CL15689.Contig3_All	1051	1.5151	0.8475	1.1966	gi|225462238|ref|XP_002263178.1|	52	5e-72	PREDICTED: ATP-dependent zinc metalloprotease FTSH 12, chloroplastic-like [Vitis vinifera]	gi|225431468|ref|XM_002274301.1|	147	3e-32	PREDICTED: Vitis vinifera callose synthase 5-like (LOC100248918), mRNA	sp|Q9SAJ3|FTSHC_ARATH	235	2e-71	ATP-dependent zinc metalloprotease FTSH 12, chloroplastic OS=Arabidopsis thaliana GN=FTSH12 PE=2 SV=2	--	--	--	--	--	K03798	5e-73	243	vvi:100244978	cell division protease FtsH [EC:3.4.24.-]	GO:0010584//pollen exine formation;GO:0009827//plant-type cell wall modification;GO:0009793//embryo development ending in seed dormancy;GO:0009846//pollen germination;GO:0010304//PSII associated light-harvesting complex II catabolic process;GO:0009556//microsporogenesis;GO:0006075//(1->3)-beta-D-glucan biosynthetic process;GO:0009658//chloroplast organization;GO:0080092//regulation of pollen tube…	GO:0004176//ATP-dependent peptidase activity;GO:0004222//metalloendopeptidase activity;GO:0030170//pyridoxal phosphate binding;GO:0003843//1,3-beta-D-glucan synthase activity;GO:0005524//ATP binding	GO:0009941//chloroplast envelope;GO:0000148//1,3-beta-D-glucan synthase complex;GO:0005739//mitochondrion
CL15689.Contig4_All	1231	0.9702	0.5788	0.7297	gi|255544590|ref|XP_002513356.1|	132.9	3e-74	Cell division protein ftsH, putative [Ricinus communis] >gi|223547264|gb|EEF48759.1| Cell division protein ftsH, putative [Ricinus communis]	gi|225431468|ref|XM_002274301.1|	147	3e-32	PREDICTED: Vitis vinifera callose synthase 5-like (LOC100248918), mRNA	sp|Q9SAJ3|FTSHC_ARATH	171	1e-73	ATP-dependent zinc metalloprotease FTSH 12, chloroplastic OS=Arabidopsis thaliana GN=FTSH12 PE=2 SV=2	--	--	--	--	--	K03798	3e-75	169	rcu:RCOM_1574610	cell division protease FtsH [EC:3.4.24.-]	GO:0010584//pollen exine formation;GO:0009827//plant-type cell wall modification;GO:0009793//embryo development ending in seed dormancy;GO:0051301//cell division;GO:0009846//pollen germination;GO:0010304//PSII associated light-harvesting complex II catabolic process;GO:0009556//microsporogenesis;GO:0006075//(1->3)-beta-D-glucan biosynthetic process;GO:0009658//chloroplast organization;GO:0080092/…	GO:0004176//ATP-dependent peptidase activity;GO:0004222//metalloendopeptidase activity;GO:0030170//pyridoxal phosphate binding;GO:0003843//1,3-beta-D-glucan synthase activity;GO:0005524//ATP binding	GO:0009941//chloroplast envelope;GO:0000148//1,3-beta-D-glucan synthase complex;GO:0005739//mitochondrion
CL15789.Contig2_All	936	2.2211	2.4741	1.9674	gi|225458503|ref|XP_002282254.1|	247.3	2e-64	PREDICTED: uncharacterized protein LOC100247210 [Vitis vinifera]	--	--	--	--	sp|Q9S9Q9|Y1044_ARATH	67.8	9e-12	BTB/POZ domain-containing protein At1g30440 OS=Arabidopsis thaliana GN=At1g30440 PE=1 SV=2	--	--	--	--	--	--	--	--	--	--	-	-	-
CL15789.Contig3_All	2238	5.7515	5.333	4.6359	gi|225458503|ref|XP_002282254.1|	786.9	0	PREDICTED: uncharacterized protein LOC100247210 [Vitis vinifera]	gi|225458502|ref|XM_002282218.1|	309	6e-81	PREDICTED: Vitis vinifera uncharacterized LOC100247210 (LOC100247210), mRNA	sp|Q9S9Q9|Y1044_ARATH	100	3e-21	BTB/POZ domain-containing protein At1g30440 OS=Arabidopsis thaliana GN=At1g30440 PE=1 SV=2	--	--	--	--	--	--	--	--	--	--	GO:0009793//embryo development ending in seed dormancy	GO:0016757//transferase activity, transferring glycosyl groups;GO:0015631//tubulin binding	GO:0044430//cytoskeletal part;GO:0015630//microtubule cytoskeleton
CL15839.Contig1_All	1418	11.3545	7.0665	7.7602	gi|225452712|ref|XP_002282568.1|	698	0	PREDICTED: V-type proton ATPase subunit d2 [Vitis vinifera] >gi|147866282|emb|CAN79922.1| hypothetical protein VITISV_042442 [Vitis vinifera]	gi|359488889|ref|XM_002282532.2|	886	0	PREDICTED: Vitis vinifera V-type proton ATPase subunit d2-like (LOC100244110), mRNA	sp|Q9LHA4|VA0D2_ARATH	686	0	V-type proton ATPase subunit d2 OS=Arabidopsis thaliana GN=VHA-D2 PE=2 SV=1	SPAC17A2.03c	362	1e-99	COG1527	Archaeal/vacuolar-type H+-ATPase subunit C	K02146	0	697	vvi:100244110	V-type H+-transporting ATPase subunit AC39 [EC:3.6.3.14]	GO:0006468//protein phosphorylation;GO:0015991//ATP hydrolysis coupled proton transport	GO:0004674//protein serine/threonine kinase activity;GO:0005524//ATP binding;GO:0046961//proton-transporting ATPase activity, rotational mechanism	GO:0000325//plant-type vacuole;GO:0009506//plasmodesma;GO:0033179//proton-transporting V-type ATPase, V0 domain;GO:0005774//vacuolar membrane;GO:0005794//Golgi apparatus;GO:0005886//plasma membrane
CL15839.Contig11_All	1982	8.4582	5.5725	5.62	gi|225452712|ref|XP_002282568.1|	698	0	PREDICTED: V-type proton ATPase subunit d2 [Vitis vinifera] >gi|147866282|emb|CAN79922.1| hypothetical protein VITISV_042442 [Vitis vinifera]	gi|359488889|ref|XM_002282532.2|	878	0	PREDICTED: Vitis vinifera V-type proton ATPase subunit d2-like (LOC100244110), mRNA	sp|Q9LHA4|VA0D2_ARATH	686	0	V-type proton ATPase subunit d2 OS=Arabidopsis thaliana GN=VHA-D2 PE=2 SV=1	SPAC17A2.03c	362	2e-99	COG1527	Archaeal/vacuolar-type H+-ATPase subunit C	K02146	0	697	vvi:100244110	V-type H+-transporting ATPase subunit AC39 [EC:3.6.3.14]	GO:0006468//protein phosphorylation;GO:0015991//ATP hydrolysis coupled proton transport	GO:0004674//protein serine/threonine kinase activity;GO:0005524//ATP binding;GO:0046961//proton-transporting ATPase activity, rotational mechanism	GO:0000325//plant-type vacuole;GO:0009506//plasmodesma;GO:0033179//proton-transporting V-type ATPase, V0 domain;GO:0005774//vacuolar membrane;GO:0005794//Golgi apparatus;GO:0005886//plasma membrane
CL15839.Contig5_All	1996	9.1524	5.578	5.5805	gi|225452712|ref|XP_002282568.1|	698	0	PREDICTED: V-type proton ATPase subunit d2 [Vitis vinifera] >gi|147866282|emb|CAN79922.1| hypothetical protein VITISV_042442 [Vitis vinifera]	gi|359488889|ref|XM_002282532.2|	896	0	PREDICTED: Vitis vinifera V-type proton ATPase subunit d2-like (LOC100244110), mRNA	sp|Q9LHA4|VA0D2_ARATH	686	0	V-type proton ATPase subunit d2 OS=Arabidopsis thaliana GN=VHA-D2 PE=2 SV=1	SPAC17A2.03c	362	2e-99	COG1527	Archaeal/vacuolar-type H+-ATPase subunit C	K02146	0	697	vvi:100244110	V-type H+-transporting ATPase subunit AC39 [EC:3.6.3.14]	GO:0006468//protein phosphorylation;GO:0015991//ATP hydrolysis coupled proton transport	GO:0004674//protein serine/threonine kinase activity;GO:0005524//ATP binding;GO:0046961//proton-transporting ATPase activity, rotational mechanism	GO:0000325//plant-type vacuole;GO:0009506//plasmodesma;GO:0033179//proton-transporting V-type ATPase, V0 domain;GO:0005774//vacuolar membrane;GO:0005794//Golgi apparatus;GO:0005886//plasma membrane
CL15858.Contig1_All	210	4.6339	7.6345	4.7053	--	--	--	--	--	--	--	--	--	--	--	--	--	--	--	--	--	--	--	--	--	--	-	-	-
CL15922.Contig2_All	2742	5.8719	6.3992	7.0762	gi|224072246|ref|XP_002303671.1|	109	3e-22	predicted protein [Populus trichocarpa] >gi|222841103|gb|EEE78650.1| predicted protein [Populus trichocarpa]	--	--	--	--	sp|Q84TH9|NLP7_ARATH	165	1e-40	Protein NLP7 OS=Arabidopsis thaliana GN=NLP7 PE=1 SV=2	--	--	--	--	--	--	--	--	--	--	GO:0010167//response to nitrate;GO:0009414//response to water deprivation;GO:0010118//stomatal movement;GO:0042128//nitrate assimilation	-	GO:0005634//nucleus
CL1594.Contig2_All	3947	15.4652	13.6978	15.4645	gi|359473576|ref|XP_002264955.2|	1975.7	0	PREDICTED: pre-mRNA-splicing factor ATP-dependent RNA helicase PRP16-like [Vitis vinifera]	gi|359473575|ref|XM_002264919.2|	692	0	PREDICTED: Vitis vinifera pre-mRNA-splicing factor ATP-dependent RNA helicase PRP16-like (LOC100261447), mRNA	sp|Q38953|DHX8_ARATH	754	0	Probable pre-mRNA-splicing factor ATP-dependent RNA helicase OS=Arabidopsis thaliana GN=At3g26560 PE=1 SV=2	YKR086w	753	0	COG1643	HrpA-like helicases	K12815	0	1941	rcu:RCOM_0298500	pre-mRNA-splicing factor ATP-dependent RNA helicase PRP16 [EC:3.6.4.13]	GO:0009793//embryo development ending in seed dormancy	GO:0003724//RNA helicase activity;GO:0008026//ATP-dependent helicase activity;GO:0003676//nucleic acid binding;GO:0005524//ATP binding	GO:0005634//nucleus
CL15965.Contig1_All	1008	20.7561	18.9538	15.9963	gi|255538460|ref|XP_002510295.1|	426.8	2e-118	protein with unknown function [Ricinus communis] >gi|223550996|gb|EEF52482.1| protein with unknown function [Ricinus communis]	gi|225458468|ref|XM_002284000.1|	377	1e-101	PREDICTED: Vitis vinifera transmembrane protein 147-like (LOC100242067), mRNA	--	--	--	--	--	--	--	--	--	K00001	1e-10	65.5	gmx:100787307	alcohol dehydrogenase [EC:1.1.1.1]	-	-	GO:0016021//integral to membrane;GO:0005794//Golgi apparatus;GO:0005739//mitochondrion;GO:0009507//chloroplast
CL15965.Contig2_All	588	11.2839	8.4071	8.4023	gi|388497716|gb|AFK36924.1|	289.7	1e-77	unknown [Lotus japonicus]	gi|225458468|ref|XM_002284000.1|	291	4e-76	PREDICTED: Vitis vinifera transmembrane protein 147-like (LOC100242067), mRNA	--	--	--	--	--	--	--	--	--	K00001	6e-11	65.5	gmx:100787307	alcohol dehydrogenase [EC:1.1.1.1]	-	-	GO:0016021//integral to membrane;GO:0005794//Golgi apparatus;GO:0005739//mitochondrion;GO:0009507//chloroplast
CL15971.Contig3_All	271	3.2644	2.6294	2.486	gi|325187394|emb|CCA21933.1|	86.7	1e-16	predicted protein putative [Albugo laibachii Nc14] >gi|325190307|emb|CCA24783.1| topoisomerase putative [Albugo laibachii Nc14]	--	--	--	--	sp|O24308|TOP2_PEA	81.3	1e-16	DNA topoisomerase 2 OS=Pisum sativum GN=TOP2 PE=2 SV=1	ECU04g0350_1	77.8	4e-15	COG0187	Type IIA topoisomerase (DNA gyrase/topo II, topoisomerase IV), B subunit	K03164	1e-17	85.9	ppp:PHYPADRAFT_120620	DNA topoisomerase II [EC:5.99.1.3]	GO:0006310//DNA recombination;GO:0007059//chromosome segregation;GO:0022403	GO:0000166//nucleotide binding;GO:0003916//DNA topoisomerase activity	GO:0005694//chromosome
CL15989.Contig2_All	1815	2.9245	2.2083	2.7221	gi|195541808|gb|ACF98012.1|	629.4	5e-179	NBS-LRR resistance-like protein RGC260 [Helianthus annuus]	gi|219563668|gb|FJ235160.1|	192	8e-46	Lactuca sativa NBS-LRR resistance-like protein RGC1A gene, partial cds	sp|Q7XBQ9|RGA2_SOLBU	273	2e-73	Disease resistance protein RGA2 OS=Solanum bulbocastanum GN=RGA2 PE=1 SV=1	--	--	--	--	--	K03013	2e-98	358	vvi:100258335	DNA-directed RNA polymerases I, II, and III subunit RPABC1	-	-	-
CL15998.Contig1_All	469	3.7725	2.9437	1.8196	gi|154467307|gb|ABS82613.1|	166.4	1e-40	putative NBS-LRR protein, partial [Coffea canephora]	gi|148285685|gb|EF559388.1|	165	5e-38	Helianthus tuberosus NBS-LRR resistance-like protein RGC109 gene, partial cds	sp|Q40392|TMVRN_NICGU	137	2e-33	TMV resistance protein N OS=Nicotiana glutinosa GN=N PE=1 SV=1	--	--	--	--	--	K13457	5e-10	61.6	osa:4342596	disease resistance protein RPM1	-	-	-
CL16014.Contig1_All	2319	5.8557	5.9149	4.2222	gi|9295721|gb|AAF87027.1|AC006535_5	70.1	1e-10	T24P13.6 [Arabidopsis thaliana]	--	--	--	--	sp|Q84WP3|REM17_ARATH	90.9	3e-18	B3 domain-containing protein REM17 OS=Arabidopsis thaliana GN=REM17 PE=2 SV=2	YOR054c	51.2	8e-06	COG0452	Phosphopantothenoylcysteine synthetase/decarboxylase	K11323	2e-08	59.7	vcn:VOLCADRAFT_121342	histone arginine demethylase JMJD6 [EC:1.14.11.-]	GO:0048437//floral organ development;GO:0048438//floral whorl development	-	-
CL1789.Contig3_All	2489	4.7627	4.0795	4.2045	gi|296081168|emb|CBI18194.3|	821.6	0	unnamed protein product [Vitis vinifera]	gi|359493184|ref|XM_002266867.2|	119	1e-23	PREDICTED: Vitis vinifera protein FAM188A-like (LOC100258904), mRNA	sp|Q9T0K5|LRX3_ARATH	54.7	2e-07	Leucine-rich repeat extensin-like protein 3 OS=Arabidopsis thaliana GN=LRX3 PE=1 SV=1	--	--	--	--	--	K01051	3e-07	55.8	gmx:100776781	pectinesterase [EC:3.1.1.11]	GO:0016926//protein desumoylation;GO:0050665//hydrogen peroxide biosynthetic process;GO:0010228//vegetative to reproductive phase transition of meristem	-	GO:0005634//nucleus;GO:0005829//cytosol
CL1807.Contig1_All	1860	5.1605	2.4901	3.1392	gi|224112158|ref|XP_002332820.1|	319.3	1e-85	cc-nbs-lrr resistance protein [Populus trichocarpa] >gi|222834208|gb|EEE72685.1| cc-nbs-lrr resistance protein [Populus trichocarpa]	--	--	--	--	sp|Q9T048|DRL27_ARATH	236	3e-62	Disease resistance protein At4g27190 OS=Arabidopsis thaliana GN=At4g27190 PE=2 SV=1	--	--	--	--	--	K13459	5e-61	234	vvi:100254298	disease resistance protein RPS2	-	-	-
CL1813.Contig2_All	1142	6.2747	5.7326	4.4049	gi|147808028|emb|CAN77671.1|	382.1	8e-105	hypothetical protein VITISV_019443 [Vitis vinifera]	gi|359481755|ref|XM_002270969.2|	315	5e-83	PREDICTED: Vitis vinifera uncharacterized LOC100246019 (LOC100246019), mRNA	--	--	--	--	SPAP8A3.13c	83.2	8e-16	COG5073	Vacuolar import and degradation protein	--	--	--	--	--	GO:0006661//phosphatidylinositol biosynthetic process	-	GO:0005634//nucleus
CL1837.Contig4_All	1363	5.0626	3.104	2.3726	gi|255565719|ref|XP_002523849.1|	545.4	7e-154	fucose synthetase, putative [Ricinus communis] >gi|223536937|gb|EEF38575.1| fucose synthetase, putative [Ricinus communis]	gi|147783902|emb|AM462080.2|	172	6e-40	Vitis vinifera contig VV78X268603.9, whole genome shotgun sequence	sp|O49213|FCL1_ARATH	527	5e-150	GDP-L-fucose synthase 1 OS=Arabidopsis thaliana GN=GER1 PE=1 SV=3	Rv1512	376	4e-104	COG0451	Nucleoside-diphosphate-sugar epimerases	K02377	6e-155	545	rcu:RCOM_1282230	GDP-L-fucose synthase [EC:1.1.1.271]	GO:0042350//GDP-L-fucose biosynthetic process;GO:0055114//oxidation-reduction process;GO:0006005//L-fucose biosynthetic process;GO:0010103//stomatal complex morphogenesis;GO:0006857//oligopeptide transport;GO:0030003//cellular cation homeostasis;GO:0019853//L-ascorbic acid biosynthetic process;GO:0070838//divalent metal ion transport	GO:0045735//nutrient reservoir activity;GO:0030145//manganese ion binding;GO:0050162//oxalate oxidase activity;GO:0050577//GDP-L-fucose synthase activity;GO:0000166//nucleotide binding;GO:0050662//coenzyme binding	GO:0031012//extracellular matrix;GO:0005737//cytoplasm;GO:0048046//apoplast
CL1844.Contig1_All	1624	9.9143	3.9489	3.9549	gi|84578877|dbj|BAE72881.1|	282.3	0	benzoyl CoA benzoic acid benzoyltransferase [Verbena x hybrida]	gi|84578876|dbj|AB234908.1|	111	2e-21	Verbena x hybrida mRNA for benzoyl CoA benzoic acid benzoyltransferase, complete cds, cultivar: Temari Violet	sp|Q8GT21|BEBT_CLABR	321	6e-158	Benzyl alcohol O-benzoyltransferase OS=Clarkia breweri PE=1 SV=1	--	--	--	--	--	K15400	4e-69	163	rcu:RCOM_1447050	omega-hydroxypalmitate O-feruloyl transferase [EC:2.3.1.188]	-	GO:0010327//acetyl CoA:(Z)-3-hexen-1-ol acetyltransferase activity	-
CL1844.Contig3_All	1530	6.2446	3.0563	2.4659	gi|84578877|dbj|BAE72881.1|	87.4	2e-175	benzoyl CoA benzoic acid benzoyltransferase [Verbena x hybrida]	gi|356500042|ref|XM_003518796.1|	99.6	8e-18	PREDICTED: Glycine max benzyl alcohol O-benzoyltransferase-like (LOC100797017), mRNA	sp|Q8GT21|BEBT_CLABR	257	2e-152	Benzyl alcohol O-benzoyltransferase OS=Clarkia breweri PE=1 SV=1	--	--	--	--	--	K15400	6e-62	139	rcu:RCOM_1447050	omega-hydroxypalmitate O-feruloyl transferase [EC:2.3.1.188]	-	GO:0010327//acetyl CoA:(Z)-3-hexen-1-ol acetyltransferase activity	-
CL1902.Contig2_All	1210	10.9668	8.1708	9.4283	gi|225440874|ref|XP_002282520.1|	471.1	1e-131	PREDICTED: uncharacterized protein LOC100261348 [Vitis vinifera] >gi|297740119|emb|CBI30301.3| unnamed protein product [Vitis vinifera]	gi|359481602|ref|XM_002282484.2|	339	4e-90	PREDICTED: Vitis vinifera uncharacterized LOC100261348 (LOC100261348), mRNA	--	--	--	--	VNG2115H	51.6	3e-06	COG0695	Glutaredoxin and related proteins	--	--	--	--	--	GO:0019684//photosynthesis, light reaction;GO:0045454//cell redox homeostasis;GO:0035304//regulation of protein dephosphorylation	GO:0009055//electron carrier activity;GO:0015035//protein disulfide oxidoreductase activity	GO:0005739//mitochondrion;GO:0009941//chloroplast envelope;GO:0009535//chloroplast thylakoid membrane
CL1908.Contig1_All	2892	19.9445	13.8747	16.8817	gi|255538592|ref|XP_002510361.1|	149.8	3e-174	conserved hypothetical protein [Ricinus communis] >gi|223551062|gb|EEF52548.1| conserved hypothetical protein [Ricinus communis]	gi|359479147|ref|XM_002266834.2|	75.8	2e-10	PREDICTED: Vitis vinifera E3 ubiquitin-protein ligase RING1-like, transcript variant 1 (LOC100251284), mRNA	sp|Q9FRK5|Y1514_ARATH	396	4e-144	Uncharacterized membrane protein At1g75140 OS=Arabidopsis thaliana GN=At1g75140 PE=1 SV=3	ECU07g0330	55.8	4e-07	COG5540	RING-finger-containing ubiquitin ligase	K11982	3e-87	322	pop:POPTR_652517	E3 ubiquitin-protein ligase RNF115/126 [EC:6.3.2.19]	GO:0006333//chromatin assembly or disassembly	-	GO:0005783//endoplasmic reticulum
CL1999.Contig2_All	2846	6.2946	8.2466	8.9008	gi|24417151|dbj|BAC22514.1|	1563.5	0	homeobox leucine-zipper protein [Zinnia elegans]	gi|18076735|emb|AJ312053.1|	2375	0	Zinnia elegans mRNA for HD-Zip protein (hb1 gene)	sp|Q9SE43|REV_ARATH	1340	0	Homeobox-leucine zipper protein REVOLUTA OS=Arabidopsis thaliana GN=REV PE=1 SV=2	--	--	--	--	--	K09338	0	1340	ath:AT5G60690	homeobox-leucine zipper protein	GO:0048519//negative regulation of biological process;GO:0007155//cell adhesion;GO:0009944//polarity specification of adaxial/abaxial axis;GO:0045010//actin nucleation;GO:0006355//regulation of transcription, DNA-dependent;GO:0010075//regulation of meristem growth;GO:0009855//determination of bilateral symmetry;GO:0010051//xylem and phloem pattern formation;GO:0009965//leaf morphogenesis;GO:00100…	GO:0043565//sequence-specific DNA binding;GO:0008289//lipid binding;GO:0003700//sequence-specific DNA binding transcription factor activity	GO:0005634//nucleus
CL1999.Contig3_All	2818	3.3277	3.3978	2.6776	gi|24417151|dbj|BAC22514.1|	1530.4	0	homeobox leucine-zipper protein [Zinnia elegans]	gi|24417150|dbj|AB084382.1|	1921	0	Zinnia elegans ZeHB-12 mRNA for homeobox leucine-zipper protein, complete cds	sp|Q9SE43|REV_ARATH	1341	0	Homeobox-leucine zipper protein REVOLUTA OS=Arabidopsis thaliana GN=REV PE=1 SV=2	--	--	--	--	--	K09338	0	1341	ath:AT5G60690	homeobox-leucine zipper protein	GO:0048519//negative regulation of biological process;GO:0007155//cell adhesion;GO:0009944//polarity specification of adaxial/abaxial axis;GO:0045010//actin nucleation;GO:0006355//regulation of transcription, DNA-dependent;GO:0010075//regulation of meristem growth;GO:0009855//determination of bilateral symmetry;GO:0010051//xylem and phloem pattern formation;GO:0009965//leaf morphogenesis;GO:00100…	GO:0043565//sequence-specific DNA binding;GO:0008289//lipid binding;GO:0003700//sequence-specific DNA binding transcription factor activity	GO:0005634//nucleus
CL2105.Contig4_All	294	3.1595	4.3929	3.5137	--	--	--	--	--	--	--	--	--	--	--	--	--	--	--	--	--	--	--	--	--	--	-	-	-
CL2172.Contig7_All	3806	5.6017	7.1962	9.6886	gi|46389755|dbj|BAD15108.1|	363.6	0	ALG2-interacting protein X [Nicotiana tabacum]	gi|225424147|ref|XM_002283945.1|	270	9e-69	PREDICTED: Vitis vinifera ALG-2 interacting protein X-like (LOC100245656), mRNA	sp|F4J9Q6|FKB43_ARATH	240	4e-63	Peptidyl-prolyl cis-trans isomerase FKBP43 OS=Arabidopsis thaliana GN=FKBP43 PE=2 SV=1	SPAC140.02	61.6	1e-08	COG0724	RNA-binding proteins (RRM domain)	K12200	0	440	pop:POPTR_820653	programmed cell death 6-interacting protein	-	-	GO:0009506//plasmodesma;GO:0005829//cytosol
CL2176.Contig1_All	2068	22.6939	28.5125	29.2768	gi|359479803|ref|XP_002276883.2|	716.1	0	PREDICTED: protein IWS1 homolog [Vitis vinifera] >gi|296086725|emb|CBI32360.3| unnamed protein product [Vitis vinifera]	gi|359479802|ref|XM_002276847.2|	567	1e-158	PREDICTED: Vitis vinifera protein IWS1 homolog (LOC100249381), mRNA	--	--	--	--	SPBC19G7.16	122	2e-27	COG5139	Uncharacterized conserved protein	K11294	4e-07	55.1	smo:SELMODRAFT_448081	nucleolin	GO:0009697//salicylic acid biosynthetic process;GO:0006944//cellular membrane fusion;GO:0006623//protein targeting to vacuole;GO:0032784//regulation of DNA-dependent transcription, elongation;GO:0006487//protein N-linked glycosylation;GO:0048193//Golgi vesicle transport;GO:0009742//brassinosteroid mediated signaling pathway;GO:0009627//systemic acquired resistance	GO:0003677//DNA binding	GO:0005634//nucleus
CL2176.Contig2_All	2044	20.0606	25.9931	28.2582	gi|359479803|ref|XP_002276883.2|	714.9	0	PREDICTED: protein IWS1 homolog [Vitis vinifera] >gi|296086725|emb|CBI32360.3| unnamed protein product [Vitis vinifera]	gi|359479802|ref|XM_002276847.2|	567	1e-158	PREDICTED: Vitis vinifera protein IWS1 homolog (LOC100249381), mRNA	--	--	--	--	SPBC19G7.16	122	2e-27	COG5139	Uncharacterized conserved protein	K03243	3e-07	55.5	vvi:100242745	translation initiation factor 5B	GO:0009697//salicylic acid biosynthetic process;GO:0006944//cellular membrane fusion;GO:0006623//protein targeting to vacuole;GO:0032784//regulation of DNA-dependent transcription, elongation;GO:0006487//protein N-linked glycosylation;GO:0048193//Golgi vesicle transport;GO:0009742//brassinosteroid mediated signaling pathway;GO:0009627//systemic acquired resistance	GO:0003677//DNA binding	GO:0005634//nucleus
CL2250.Contig2_All	1636	6.8134	6.1249	5.7104	gi|224054238|ref|XP_002298160.1|	440.3	4e-122	predicted protein [Populus trichocarpa] >gi|222845418|gb|EEE82965.1| predicted protein [Populus trichocarpa]	gi|356517672|ref|XM_003527463.1|	256	6e-65	PREDICTED: Glycine max replication factor C subunit 1-like (LOC100802809), mRNA	sp|Q9FPQ6|GP1_CHLRE	56.6	4e-08	Vegetative cell wall protein gp1 OS=Chlamydomonas reinhardtii GN=GP1 PE=2 SV=1	SPBC23E6.07c_1	90.1	1e-17	COG5275	BRCT domain type II	K10754	4e-123	440	pop:POPTR_548716	replication factor C subunit 1	GO:0006974//response to DNA damage stimulus;GO:0031935//regulation of chromatin silencing;GO:0051570//regulation of histone H3-K9 methylation;GO:0009737//response to abscisic acid stimulus	GO:0000166//nucleotide binding;GO:0003824//catalytic activity	GO:0043229//intracellular organelle
CL2250.Contig3_All	3740	10.3841	8.9665	8.4184	gi|296083902|emb|CBI24290.3|	1207.6	0	unnamed protein product [Vitis vinifera]	gi|359479290|ref|XM_002265855.2|	523	1e-145	PREDICTED: Vitis vinifera replication factor C subunit 1-like (LOC100249625), mRNA	sp|Q9FPQ6|GP1_CHLRE	58.9	2e-08	Vegetative cell wall protein gp1 OS=Chlamydomonas reinhardtii GN=GP1 PE=2 SV=1	SPBC23E6.07c_2	261	8e-69	COG0470	ATPase involved in DNA replication	K10754	0	1192	vvi:100249625	replication factor C subunit 1	GO:0006974//response to DNA damage stimulus;GO:0031935//regulation of chromatin silencing;GO:0051570//regulation of histone H3-K9 methylation;GO:0009737//response to abscisic acid stimulus	GO:0017111//nucleoside-triphosphatase activity;GO:0003677//DNA binding;GO:0005524//ATP binding	GO:0043234//protein complex;GO:0005634//nucleus
CL2297.Contig1_All	788	6.7921	5.9342	5.8708	gi|255554751|ref|XP_002518413.1|	309.7	2e-83	heat shock protein 70 (HSP70)-interacting protein, putative [Ricinus communis] >gi|223542258|gb|EEF43800.1| heat shock protein 70 (HSP70)-interacting protein, putative [Ricinus communis]	gi|149192948|gb|AC162440.26|	89.7	4e-15	Medicago truncatula chromosome 8 clone mth2-177g2, complete sequence	sp|Q84K11|PPP5_SOLLC	69.3	2e-12	Serine/threonine-protein phosphatase 5 OS=Solanum lycopersicum GN=PP5 PE=1 SV=1	YBR155w	58.5	1e-08	COG0457	FOG: TPR repeat	K04460	2e-13	74.7	ppp:PHYPADRAFT_106477	protein phosphatase 5 [EC:3.1.3.16]	GO:0006950//response to stress	-	GO:0005829//cytosol
CL2297.Contig4_All	2613	8.4809	7.1412	7.3224	gi|224118154|ref|XP_002331571.1|	995.3	0	predicted protein [Populus trichocarpa] >gi|222873795|gb|EEF10926.1| predicted protein [Populus trichocarpa]	gi|356562741|ref|XM_003549580.1|	210	5e-51	PREDICTED: Glycine max uncharacterized protein LOC100786963 (LOC100786963), mRNA	sp|Q84K11|PPP5_SOLLC	69.3	1e-11	Serine/threonine-protein phosphatase 5 OS=Solanum lycopersicum GN=PP5 PE=1 SV=1	YBR155w	58.5	6e-08	COG0457	FOG: TPR repeat	K04460	7e-13	74.7	ppp:PHYPADRAFT_106477	protein phosphatase 5 [EC:3.1.3.16]	-	-	GO:0005829//cytosol;GO:0009536//plastid
CL2317.Contig2_All	1297	8.2873	7.7601	8.8651	gi|350536789|ref|NP_001234265.1|	224.6	2e-57	uncharacterized protein LOC100505457 [Solanum lycopersicum]	gi|147809499|emb|AM424940.2|	77.8	2e-11	Vitis vinifera contig VV78X271576.4, whole genome shotgun sequence	--	--	--	--	--	--	--	--	--	--	--	--	--	--	-	-	-
CL2328.Contig1_All	340	2.9922	1.8338	2.3778	--	--	--	--	--	--	--	--	--	--	--	--	--	--	--	--	--	--	--	--	--	--	-	-	-
CL2329.Contig2_All	482	4.2214	4.0654	4.2864	--	--	--	--	--	--	--	--	--	--	--	--	--	--	--	--	--	--	--	--	--	--	-	-	-
CL234.Contig1_All	888	30.1361	26.2795	28.729	--	--	--	--	--	--	--	--	--	--	--	--	--	--	--	--	--	--	--	--	--	--	-	-	-
CL234.Contig2_All	688	17.1016	12.3636	12.1425	--	--	--	--	--	--	--	--	--	--	--	--	--	--	--	--	--	--	--	--	--	--	-	-	-
CL2372.Contig2_All	3112	5.9555	4.2646	4.8061	gi|225454813|ref|XP_002275630.1|	1790	0	PREDICTED: exportin-1 isoform 1 [Vitis vinifera] >gi|147799770|emb|CAN61845.1| hypothetical protein VITISV_008353 [Vitis vinifera] >gi|297737334|emb|CBI26535.3| unnamed protein product [Vitis vinifera]	gi|359489895|ref|XM_002275594.2|	1471	0	PREDICTED: Vitis vinifera exportin-1-like, transcript variant 1 (LOC100256288), mRNA	--	--	--	--	SPAC1805.17	938	0	COG5101	Importin beta-related nuclear transport receptor	K14290	0	1790	vvi:100256288	exportin-1	GO:0007010//cytoskeleton organization;GO:0006094//gluconeogenesis;GO:0000741//karyogamy;GO:0000059//protein import into nucleus, docking;GO:0000911//cytokinesis by cell plate formation;GO:0010498//proteasomal protein catabolic process;GO:0006611//protein export from nucleus;GO:0009560//embryo sac egg cell differentiation;GO:0009846//pollen germination;GO:0009555//pollen development;GO:0009165//nu…	GO:0005515//protein binding;GO:0008565//protein transporter activity;GO:0004872//receptor activity	GO:0005829//cytosol;GO:0005643//nuclear pore
CL2486.Contig3_All	1259	5.27	8.5249	11.844	gi|224105771|ref|XP_002313927.1|	216.1	8e-55	predicted protein [Populus trichocarpa] >gi|222850335|gb|EEE87882.1| predicted protein [Populus trichocarpa]	gi|225319802|dbj|AK329983.1|	105	1e-19	Solanum lycopersicum cDNA, clone: LEFL3162J01, HTC in root	--	--	--	--	--	--	--	--	--	--	--	--	--	--	-	-	GO:0009535//chloroplast thylakoid membrane
CL250.Contig2_All	1218	3.3048	2.1207	3.835	gi|359474723|ref|XP_002270533.2|	600.1	2e-170	PREDICTED: ABC transporter G family member 14-like [Vitis vinifera] >gi|296085456|emb|CBI29188.3| unnamed protein product [Vitis vinifera]	gi|359474722|ref|XM_002270497.2|	347	2e-92	PREDICTED: Vitis vinifera ABC transporter G family member 14-like (LOC100247745), mRNA	sp|Q9C6W5|AB14G_ARATH	559	1e-159	ABC transporter G family member 14 OS=Arabidopsis thaliana GN=ABCG14 PE=2 SV=1	YCR011c_3	77.8	4e-14	COG0842	ABC-type multidrug transport system, permease component	K05681	2e-28	125	cme:CMS467C	ATP-binding cassette, subfamily G (WHITE), member 2	GO:0006200//ATP catabolic process	GO:0015416//organic phosphonate transmembrane-transporting ATPase activity;GO:0005524//ATP binding	GO:0016020//membrane
CL2518.Contig4_All	770	6.2041	6.0151	3.1498	gi|255545916|ref|XP_002514018.1|	269.2	4e-71	glucose-6-phosphate isomerase, putative [Ricinus communis] >gi|223547104|gb|EEF48601.1| glucose-6-phosphate isomerase, putative [Ricinus communis]	gi|225314977|dbj|AK321326.1|	157	2e-35	Solanum lycopersicum cDNA, clone: LEFL1023BC02, HTC in leaf	--	--	--	--	alr1050	194	2e-49	COG0166	Glucose-6-phosphate isomerase	K01810	4e-72	269	rcu:RCOM_1039110	glucose-6-phosphate isomerase [EC:5.3.1.9]	GO:0043085//positive regulation of catalytic activity;GO:0019252//starch biosynthetic process;GO:0009664//plant-type cell wall organization;GO:0019288//isopentenyl diphosphate biosynthetic process, mevalonate-independent pathway;GO:0009911//positive regulation of flower development;GO:0000023//maltose metabolic process;GO:0006006//glucose metabolic process;GO:0000272//polysaccharide catabolic pro…	GO:1901363;GO:0004347//glucose-6-phosphate isomerase activity;GO:0097159//organic cyclic compound binding	GO:0009941//chloroplast envelope;GO:0005829//cytosol;GO:0009570//chloroplast stroma
CL2586.Contig1_All	469	1.1318	2.6588	3.5433	gi|255543367|ref|XP_002512746.1|	53.9	9e-07	Mitogen-activated protein kinase kinase kinase, putative [Ricinus communis] >gi|223547757|gb|EEF49249.1| Mitogen-activated protein kinase kinase kinase, putative [Ricinus communis]	--	--	--	--	--	--	--	--	--	--	--	--	--	--	--	--	--	--	-	GO:0016772//transferase activity, transferring phosphorus-containing groups	-
CL2586.Contig2_All	473	2.1509	3.3895	3.2285	gi|255543367|ref|XP_002512746.1|	52.8	2e-06	Mitogen-activated protein kinase kinase kinase, putative [Ricinus communis] >gi|223547757|gb|EEF49249.1| Mitogen-activated protein kinase kinase kinase, putative [Ricinus communis]	--	--	--	--	--	--	--	--	--	--	--	--	--	--	--	--	--	--	-	-	-
CL2586.Contig3_All	1219	2.6852	5.6627	7.2585	gi|255543573|ref|XP_002512849.1|	322.4	8e-87	ATP binding protein, putative [Ricinus communis] >gi|223547860|gb|EEF49352.1| ATP binding protein, putative [Ricinus communis]	gi|226432441|gb|AC235806.1|	83.8	4e-13	Solanum lycopersicum chromosome 3 clone C03SLe0090P17, complete sequence	sp|Q9FZ36|M3K2_ARATH	122	3e-28	Mitogen-activated protein kinase kinase kinase 2 OS=Arabidopsis thaliana GN=ANP2 PE=2 SV=1	YAR019c	99.8	9e-21	COG0515	Serine/threonine protein kinase	K13414	8e-26	116	sbi:SORBI_01g040360	mitogen-activated protein kinase kinase kinase 1, plant [EC:2.7.11.25]	GO:0006810//transport;GO:0006468//protein phosphorylation;GO:0009628//response to abiotic stimulus;GO:0009737//response to abscisic acid stimulus;GO:0006950//response to stress;GO:0035556//intracellular signal transduction	GO:0000166//nucleotide binding;GO:0004674//protein serine/threonine kinase activity	GO:0016020//membrane
CL2647.Contig3_All	3441	9.7952	9.7456	10.3638	gi|224135291|ref|XP_002327611.1|	91.7	8e-17	predicted protein [Populus trichocarpa] >gi|222836165|gb|EEE74586.1| predicted protein [Populus trichocarpa]	--	--	--	--	sp|Q9C6H3|SINL2_ARATH	162	1e-39	E3 ubiquitin-protein ligase SINA-like 2 OS=Arabidopsis thaliana GN=At1g66620 PE=2 SV=1	--	--	--	--	--	K04506	4e-20	99.4	pop:POPTR_555252	E3 ubiquitin-protein ligase SIAH1 [EC:6.3.2.19]	GO:0009987//cellular process	-	GO:0044424//intracellular part
CL2674.Contig2_All	473	3.5536	3.1071	3.0386	--	--	--	--	gi|330250293|gb|CP002685.1|	61.9	5e-07	Arabidopsis thaliana chromosome 2, complete sequence	--	--	--	--	--	--	--	--	--	--	--	--	--	--	-	-	-
CL2734.Contig2_All	1312	6.6417	3.2586	3.5945	gi|255540885|ref|XP_002511507.1|	353.6	3e-96	Chaperone protein dnaJ, putative [Ricinus communis] >gi|223550622|gb|EEF52109.1| Chaperone protein dnaJ, putative [Ricinus communis]	gi|225456634|ref|XM_002270157.1|	91.7	2e-15	PREDICTED: Vitis vinifera dnaJ homolog subfamily B member 13-like, transcript variant 1 (LOC100246709), mRNA	sp|Q04960|DNJH_CUCSA	126	3e-29	DnaJ protein homolog OS=Cucumis sativus GN=DNAJ1 PE=2 SV=1	all1488	102	2e-21	COG2214	DnaJ-class molecular chaperone	K09510	9e-93	338	vvi:100246709	DnaJ homolog subfamily B member 4	-	GO:0005488//binding	-
CL2819.Contig1_All	1092	3.1595	4.323	5.3058	gi|225454032|ref|XP_002274864.1|	233	5e-60	PREDICTED: uncharacterized protein LOC100262506 [Vitis vinifera]	--	--	--	--	sp|P05434|CATR_CHLRE	48.9	5e-06	Caltractin OS=Chlamydomonas reinhardtii PE=1 SV=1	SPCC1682.04	49.7	9e-06	COG5126	Ca2+-binding protein (EF-Hand superfamily)	K11294	1e-09	62.4	mtr:MTR_4g074930	nucleolin	-	-	-
CL2824.Contig3_All	1733	18.9897	17.3719	20.008	gi|225452055|ref|XP_002283926.1|	476.9	4e-133	PREDICTED: mannose-6-phosphate isomerase [Vitis vinifera]	gi|270142804|gb|BT109756.1|	79.8	8e-12	Picea glauca clone GQ03212_B04 mRNA sequence	sp|Q56WH4|HDT2_ARATH	56.2	6e-08	Histone deacetylase HDT2 OS=Arabidopsis thaliana GN=HDT2 PE=1 SV=2	YER003c	266	8e-71	COG1482	Phosphomannose isomerase	K01809	4e-134	476	vvi:100263511	mannose-6-phosphate isomerase [EC:5.3.1.8]	GO:0005975//carbohydrate metabolic process;GO:0009793//embryo development ending in seed dormancy;GO:0019853//L-ascorbic acid biosynthetic process	GO:0004476//mannose-6-phosphate isomerase activity	GO:0005737//cytoplasm
CL2845.Contig1_All	1250	3.9633	3.8834	4.2399	gi|359482584|ref|XP_002270971.2|	117.5	3e-63	PREDICTED: uncharacterized protein LOC100241217 [Vitis vinifera] >gi|297742921|emb|CBI35788.3| unnamed protein product [Vitis vinifera]	gi|356571280|ref|XM_003553759.1|	91.7	2e-15	PREDICTED: Glycine max uncharacterized protein LOC100812708 (LOC100812708), mRNA	--	--	--	--	--	--	--	--	--	--	--	--	--	--	-	-	GO:0044464//cell part
CL2845.Contig3_All	1835	5.3754	4.9753	5.1401	gi|359482584|ref|XP_002270971.2|	117.5	1e-89	PREDICTED: uncharacterized protein LOC100241217 [Vitis vinifera] >gi|297742921|emb|CBI35788.3| unnamed protein product [Vitis vinifera]	gi|356571280|ref|XM_003553759.1|	91.7	2e-15	PREDICTED: Glycine max uncharacterized protein LOC100812708 (LOC100812708), mRNA	--	--	--	--	--	--	--	--	--	--	--	--	--	--	-	-	GO:0009536//plastid
CL2910.Contig2_All	307	1.2967	1.7408	0.4389	gi|356537920|ref|XP_003537454.1|	50.4	8e-06	PREDICTED: protein kinase APK1B, chloroplastic-like [Glycine max]	--	--	--	--	sp|C0LGH3|Y5614_ARATH	48.1	1e-06	Probable LRR receptor-like serine/threonine-protein kinase At1g56140 OS=Arabidopsis thaliana GN=At1g56140 PE=1 SV=2	--	--	--	--	--	--	--	--	--	--	-	-	-
CL2910.Contig4_All	418	2.1164	1.4916	0.8596	gi|298709631|emb|CBJ31440.1|	50.8	6e-06	similar to Serine/threonine-protein kinase CTR1 [Ectocarpus siliculosus]	--	--	--	--	--	--	--	--	--	--	--	--	--	--	--	--	--	--	-	-	-
CL2910.Contig5_All	254	2.0897	3.5067	3.7134	gi|326524428|dbj|BAK00597.1|	52.4	2e-06	predicted protein [Hordeum vulgare subsp. vulgare]	--	--	--	--	sp|Q3EDL4|Y1154_ARATH	48.9	7e-07	Probable serine/threonine-protein kinase At1g01540 OS=Arabidopsis thaliana GN=At1g01540 PE=1 SV=2	--	--	--	--	--	--	--	--	--	--	-	-	-
CL2976.Contig1_All	731	10.5893	8.5901	8.7248	gi|297734460|emb|CBI15707.3|	386	2e-106	unnamed protein product [Vitis vinifera]	gi|359491568|ref|XM_002280497.2|	206	2e-50	PREDICTED: Vitis vinifera uncharacterized LOC100266246 (LOC100266246), mRNA	--	--	--	--	--	--	--	--	--	--	--	--	--	--	-	GO:0005524//ATP binding	GO:0016020//membrane;GO:0005634//nucleus
CL2976.Contig2_All	2778	9.6968	8.7851	9.733	gi|297734460|emb|CBI15707.3|	907.5	0	unnamed protein product [Vitis vinifera]	gi|356527800|ref|XM_003532447.1|	240	6e-60	PREDICTED: Glycine max uncharacterized protein LOC100816702 (LOC100816702), mRNA	--	--	--	--	--	--	--	--	--	--	--	--	--	--	-	GO:0005524//ATP binding	GO:0016020//membrane;GO:0005634//nucleus
CL2976.Contig3_All	2412	9.0226	8.2533	8.7333	gi|297734460|emb|CBI15707.3|	875.9	0	unnamed protein product [Vitis vinifera]	gi|356527800|ref|XM_003532447.1|	240	5e-60	PREDICTED: Glycine max uncharacterized protein LOC100816702 (LOC100816702), mRNA	--	--	--	--	--	--	--	--	--	K09060	1e-05	50.8	aly:ARALYDRAFT_473396	plant G-box-binding factor	-	GO:0005524//ATP binding	GO:0016020//membrane;GO:0005634//nucleus
CL2979.Contig2_All	1519	9.1436	10.0855	10.3785	gi|359473854|ref|XP_002269010.2|	357.8	2e-97	PREDICTED: hsp70 nucleotide exchange factor FES1 [Vitis vinifera]	gi|359473853|ref|XM_002268974.2|	97.6	3e-17	PREDICTED: Vitis vinifera hsp70 nucleotide exchange factor FES1-like (LOC100266149), mRNA	--	--	--	--	--	--	--	--	--	K14001	2e-98	357	vvi:100266149	nucleotide exchange factor SIL1	-	-	GO:0005739//mitochondrion;GO:0005783//endoplasmic reticulum
CL2982.Contig4_All	3952	8.3944	8.0911	9.0579	gi|359494102|ref|XP_002276879.2|	809.7	0	PREDICTED: uncharacterized protein LOC100243584 [Vitis vinifera]	gi|359494101|ref|XM_002276843.2|	109	2e-20	PREDICTED: Vitis vinifera uncharacterized LOC100243584 (LOC100243584), mRNA	sp|Q9SB89|RH27_ARATH	52	3e-06	DEAD-box ATP-dependent RNA helicase 27 OS=Arabidopsis thaliana GN=RH27 PE=2 SV=2	SPCC825.01	57.4	2e-07	COG0488	ATPase components of ABC transporters with duplicated ATPase domains	K12821	8e-06	52	gmx:100806019	pre-mRNA-processing factor 40	GO:0048608//reproductive structure development;GO:0050896//response to stimulus;GO:0009791//post-embryonic development;GO:0050789//regulation of biological process	-	-
CL3042.Contig2_All	1304	2.9511	8.0941	7.2676	gi|255560677|ref|XP_002521352.1|	233.4	5e-60	Nuclear transcription factor Y subunit A-3, putative [Ricinus communis] >gi|223539430|gb|EEF41020.1| Nuclear transcription factor Y subunit A-3, putative [Ricinus communis]	gi|255560676|ref|XM_002521306.1|	60	6e-06	Ricinus communis Nuclear transcription factor Y subunit A-3, putative, mRNA	sp|Q93ZH2|NFYA3_ARATH	171	1e-42	Nuclear transcription factor Y subunit A-3 OS=Arabidopsis thaliana GN=NFYA3 PE=2 SV=2	SPBC725.11c	84.3	4e-16	COG5224	CCAAT-binding factor, subunit B	K08064	5e-38	157	sbi:SORBI_01g045500	nuclear transcription factor Y, alpha	GO:0006355//regulation of transcription, DNA-dependent	GO:0003700//sequence-specific DNA binding transcription factor activity	-
CL3042.Contig3_All	1198	2.5107	7.0631	5.6611	gi|255560677|ref|XP_002521352.1|	228.8	1e-58	Nuclear transcription factor Y subunit A-3, putative [Ricinus communis] >gi|223539430|gb|EEF41020.1| Nuclear transcription factor Y subunit A-3, putative [Ricinus communis]	gi|255560676|ref|XM_002521306.1|	60	5e-06	Ricinus communis Nuclear transcription factor Y subunit A-3, putative, mRNA	sp|Q93ZH2|NFYA3_ARATH	171	1e-42	Nuclear transcription factor Y subunit A-3 OS=Arabidopsis thaliana GN=NFYA3 PE=2 SV=2	SPBC725.11c	84.3	4e-16	COG5224	CCAAT-binding factor, subunit B	K08064	4e-38	157	sbi:SORBI_01g045500	nuclear transcription factor Y, alpha	GO:0006355//regulation of transcription, DNA-dependent	GO:0003700//sequence-specific DNA binding transcription factor activity	GO:0016023//cytoplasmic membrane-bounded vesicle
CL3047.Contig10_All	563	2.0427	1.4238	1.7551	gi|302804067|ref|XP_002983786.1|	46.2	1e-19	hypothetical protein SELMODRAFT_180460 [Selaginella moellendorffii] >gi|300148623|gb|EFJ15282.1| hypothetical protein SELMODRAFT_180460 [Selaginella moellendorffii]	--	--	--	--	--	--	--	--	RP263	57	5e-14	COG1217	Predicted membrane GTPase involved in stress response	K06207	1e-20	71.6	smo:SELMODRAFT_180460	GTP-binding protein	GO:0006626//protein targeting to mitochondrion	GO:0000166//nucleotide binding	GO:0005739//mitochondrion
CL3047.Contig4_All	605	2.3396	0.4417	1.2621	gi|359485268|ref|XP_003633251.1|	55.8	4e-07	PREDICTED: GTP-binding protein TypA/BipA homolog isoform 2 [Vitis vinifera]	--	--	--	--	--	--	--	--	DR1198	50.1	3e-06	COG1217	Predicted membrane GTPase involved in stress response	K06207	5e-08	55.8	vvi:100247278	GTP-binding protein	-	-	-
CL3047.Contig5_All	563	1.4928	0.791	1.2764	gi|359485268|ref|XP_003633251.1|	55.8	3e-07	PREDICTED: GTP-binding protein TypA/BipA homolog isoform 2 [Vitis vinifera]	--	--	--	--	--	--	--	--	DR1198	50.1	2e-06	COG1217	Predicted membrane GTPase involved in stress response	K06207	4e-08	55.8	vvi:100247278	GTP-binding protein	-	-	GO:0005622//intracellular
CL3047.Contig6_All	282	0.9411	3.4743	3.6632	--	--	--	--	--	--	--	--	--	--	--	--	--	--	--	--	--	--	--	--	--	--	-	-	-
CL3047.Contig8_All	2898	8.2879	5.5937	6.5868	gi|224115140|ref|XP_002332211.1|	137.1	1e-30	predicted protein [Populus trichocarpa] >gi|222874875|gb|EEF12006.1| predicted protein [Populus trichocarpa]	--	--	--	--	--	--	--	--	--	--	--	--	--	K06207	8e-08	58.2	vvi:100247278	GTP-binding protein	-	-	-
CL3047.Contig9_All	535	2.2323	1.2486	1.4272	gi|302804067|ref|XP_002983786.1|	113.6	1e-24	hypothetical protein SELMODRAFT_180460 [Selaginella moellendorffii] >gi|300148623|gb|EFJ15282.1| hypothetical protein SELMODRAFT_180460 [Selaginella moellendorffii]	--	--	--	--	--	--	--	--	RP263	89.7	2e-18	COG1217	Predicted membrane GTPase involved in stress response	K06207	1e-25	113	smo:SELMODRAFT_180460	GTP-binding protein	GO:0006626//protein targeting to mitochondrion	GO:0000166//nucleotide binding	GO:0005739//mitochondrion
CL305.Contig1_All	1680	13.1645	13.9171	13.7684	gi|289157416|gb|ADC84348.1|	875.9	0	1-hydroxy-2-methyl-2-(E)-butenyl 4-diphosphate reductase [Artemisia annua]	gi|164452987|gb|EU332141.1|	2518	0	Artemisia annua IPP/DMAPP synthase (ispH) mRNA, complete cds	sp|Q6AVG6|ISPH_ORYSJ	714	0	4-hydroxy-3-methylbut-2-enyl diphosphate reductase, chloroplastic OS=Oryza sativa subsp. japonica GN=ISPH PE=2 SV=1	all0985	527	2e-149	COG0761	Penicillin tolerance protein	K03527	0	752	vvi:100267479	4-hydroxy-3-methylbut-2-enyl diphosphate reductase [EC:1.17.1.2]	GO:0016114//terpenoid biosynthetic process;GO:0019288//isopentenyl diphosphate biosynthetic process, mevalonate-independent pathway;GO:0055114//oxidation-reduction process	GO:0051745//4-hydroxy-3-methylbut-2-en-1-yl diphosphate reductase activity;GO:0046429//4-hydroxy-3-methylbut-2-en-1-yl diphosphate synthase activity;GO:0051538//3 iron, 4 sulfur cluster binding	GO:0009570//chloroplast stroma
CL305.Contig2_All	1770	10.8958	12.354	12.9414	gi|289157416|gb|ADC84348.1|	875.9	0	1-hydroxy-2-methyl-2-(E)-butenyl 4-diphosphate reductase [Artemisia annua]	gi|289157415|gb|GQ119345.1|	2631	0	Artemisia annua 1-hydroxy-2-methyl-2-(E)-butenyl 4-diphosphate reductase (HDR) mRNA, complete cds	sp|Q6AVG6|ISPH_ORYSJ	714	0	4-hydroxy-3-methylbut-2-enyl diphosphate reductase, chloroplastic OS=Oryza sativa subsp. japonica GN=ISPH PE=2 SV=1	all0985	527	2e-149	COG0761	Penicillin tolerance protein	K03527	0	752	vvi:100267479	4-hydroxy-3-methylbut-2-enyl diphosphate reductase [EC:1.17.1.2]	GO:0016114//terpenoid biosynthetic process;GO:0019288//isopentenyl diphosphate biosynthetic process, mevalonate-independent pathway;GO:0055114//oxidation-reduction process	GO:0051745//4-hydroxy-3-methylbut-2-en-1-yl diphosphate reductase activity;GO:0046429//4-hydroxy-3-methylbut-2-en-1-yl diphosphate synthase activity;GO:0051538//3 iron, 4 sulfur cluster binding	GO:0009570//chloroplast stroma
CL3061.Contig1_All	663	1.401	2.0823	2.371	--	--	--	--	--	--	--	--	--	--	--	--	--	--	--	--	--	--	--	--	--	--	-	-	-
CL307.Contig2_All	1055	2.0544	1.393	1.9158	gi|255544816|ref|XP_002513469.1|	305.1	1e-81	conserved hypothetical protein [Ricinus communis] >gi|223547377|gb|EEF48872.1| conserved hypothetical protein [Ricinus communis]	gi|224075783|ref|XM_002304730.1|	79.8	5e-12	Populus trichocarpa predicted protein, mRNA	sp|Q03211|PEXLP_TOBAC	60.1	2e-09	Pistil-specific extensin-like protein OS=Nicotiana tabacum PE=2 SV=1	BMEI1333	85.5	1e-16	COG2332	Cytochrome c-type biogenesis protein CcmE	K01115	4e-10	63.9	vcn:VOLCADRAFT_99471	phospholipase D [EC:3.1.4.4]	GO:0017003;GO:0017004//cytochrome complex assembly	-	GO:0005886//plasma membrane
CL307.Contig3_All	996	3.0199	2.6381	4.6448	gi|297819882|ref|XP_002877824.1|	300.8	1e-80	hypothetical protein ARALYDRAFT_485534 [Arabidopsis lyrata subsp. lyrata] >gi|297323662|gb|EFH54083.1| hypothetical protein ARALYDRAFT_485534 [Arabidopsis lyrata subsp. lyrata]	gi|224075783|ref|XM_002304730.1|	79.8	5e-12	Populus trichocarpa predicted protein, mRNA	sp|Q03211|PEXLP_TOBAC	60.1	2e-09	Pistil-specific extensin-like protein OS=Nicotiana tabacum PE=2 SV=1	BMEI1333	85.5	1e-16	COG2332	Cytochrome c-type biogenesis protein CcmE	K01115	4e-10	63.9	vcn:VOLCADRAFT_99471	phospholipase D [EC:3.1.4.4]	GO:0017003;GO:0017004//cytochrome complex assembly	-	GO:0005886//plasma membrane
CL307.Contig4_All	949	4.1949	5.0213	6.6259	gi|297819882|ref|XP_002877824.1|	300.4	2e-80	hypothetical protein ARALYDRAFT_485534 [Arabidopsis lyrata subsp. lyrata] >gi|297323662|gb|EFH54083.1| hypothetical protein ARALYDRAFT_485534 [Arabidopsis lyrata subsp. lyrata]	gi|224075783|ref|XM_002304730.1|	79.8	4e-12	Populus trichocarpa predicted protein, mRNA	sp|P13983|EXTN_TOBAC	55.8	3e-08	Extensin OS=Nicotiana tabacum GN=HRGPNT3 PE=2 SV=1	VC2053	87	4e-17	COG2332	Cytochrome c-type biogenesis protein CcmE	K01051	5e-09	60.1	gmx:100776781	pectinesterase [EC:3.1.1.11]	GO:0017003;GO:0017004//cytochrome complex assembly	-	GO:0005886//plasma membrane
CL307.Contig5_All	1011	2.8001	2.643	3.1986	gi|255544816|ref|XP_002513469.1|	305.1	1e-81	conserved hypothetical protein [Ricinus communis] >gi|223547377|gb|EEF48872.1| conserved hypothetical protein [Ricinus communis]	gi|224075783|ref|XM_002304730.1|	79.8	5e-12	Populus trichocarpa predicted protein, mRNA	sp|Q9FPQ6|GP1_CHLRE	58.5	6e-09	Vegetative cell wall protein gp1 OS=Chlamydomonas reinhardtii GN=GP1 PE=2 SV=1	BMEI1333	85.5	1e-16	COG2332	Cytochrome c-type biogenesis protein CcmE	K01051	7e-10	63.2	gmx:100776781	pectinesterase [EC:3.1.1.11]	GO:0017003;GO:0017004//cytochrome complex assembly	-	GO:0005886//plasma membrane
CL307.Contig6_All	1008	3.2911	2.2532	3.5646	gi|255544816|ref|XP_002513469.1|	302.8	5e-81	conserved hypothetical protein [Ricinus communis] >gi|223547377|gb|EEF48872.1| conserved hypothetical protein [Ricinus communis]	gi|224075783|ref|XM_002304730.1|	79.8	5e-12	Populus trichocarpa predicted protein, mRNA	sp|P13983|EXTN_TOBAC	55.8	4e-08	Extensin OS=Nicotiana tabacum GN=HRGPNT3 PE=2 SV=1	VC2053	87	5e-17	COG2332	Cytochrome c-type biogenesis protein CcmE	K01051	6e-09	60.1	gmx:100776781	pectinesterase [EC:3.1.1.11]	GO:0017003;GO:0017004//cytochrome complex assembly	-	GO:0005886//plasma membrane
CL3081.Contig1_All	1950	7.6897	5.2985	4.9521	gi|225446625|ref|XP_002276769.1|	666	0	PREDICTED: uncharacterized protein LOC100267778 [Vitis vinifera]	gi|359485289|ref|XM_002276733.2|	208	2e-50	PREDICTED: Vitis vinifera uncharacterized LOC100267778 (LOC100267778), mRNA	sp|P49493|RR5_ODOSI	85.1	1e-16	30S ribosomal protein S5, chloroplastic OS=Odontella sinensis GN=rps5 PE=3 SV=1	PA4246	103	1e-21	COG0098	Ribosomal protein S5	K02988	1e-20	100	cme:CMK274C	small subunit ribosomal protein S5	GO:0006412//translation;GO:0009220//pyrimidine ribonucleotide biosynthetic process	GO:0003723//RNA binding;GO:0003735//structural constituent of ribosome	GO:0005840//ribosome;GO:0005739//mitochondrion;GO:0009536//plastid;GO:0005768//endosome;GO:0005802//trans-Golgi network;GO:0005794//Golgi apparatus
CL3081.Contig2_All	1965	7.2483	5.6207	4.8229	gi|225446625|ref|XP_002276769.1|	667.5	0	PREDICTED: uncharacterized protein LOC100267778 [Vitis vinifera]	gi|359485289|ref|XM_002276733.2|	208	2e-50	PREDICTED: Vitis vinifera uncharacterized LOC100267778 (LOC100267778), mRNA	sp|P49493|RR5_ODOSI	85.1	1e-16	30S ribosomal protein S5, chloroplastic OS=Odontella sinensis GN=rps5 PE=3 SV=1	PA4246	103	1e-21	COG0098	Ribosomal protein S5	K02988	1e-20	100	cme:CMK274C	small subunit ribosomal protein S5	GO:0006412//translation;GO:0009220//pyrimidine ribonucleotide biosynthetic process	GO:0003723//RNA binding;GO:0003735//structural constituent of ribosome	GO:0005840//ribosome;GO:0005739//mitochondrion;GO:0009536//plastid;GO:0005768//endosome;GO:0005802//trans-Golgi network;GO:0005794//Golgi apparatus
CL3081.Contig3_All	1965	8.5989	5.6207	5.2571	gi|225446625|ref|XP_002276769.1|	667.5	0	PREDICTED: uncharacterized protein LOC100267778 [Vitis vinifera]	gi|359485289|ref|XM_002276733.2|	208	2e-50	PREDICTED: Vitis vinifera uncharacterized LOC100267778 (LOC100267778), mRNA	sp|P49493|RR5_ODOSI	85.1	1e-16	30S ribosomal protein S5, chloroplastic OS=Odontella sinensis GN=rps5 PE=3 SV=1	PA4246	103	1e-21	COG0098	Ribosomal protein S5	K02988	1e-20	100	cme:CMK274C	small subunit ribosomal protein S5	GO:0006412//translation;GO:0009220//pyrimidine ribonucleotide biosynthetic process	GO:0003723//RNA binding;GO:0003735//structural constituent of ribosome	GO:0005840//ribosome;GO:0005739//mitochondrion;GO:0009536//plastid;GO:0005768//endosome;GO:0005802//trans-Golgi network;GO:0005794//Golgi apparatus
CL3081.Contig4_All	1950	8.597	7.1484	5.8043	gi|225446625|ref|XP_002276769.1|	666	0	PREDICTED: uncharacterized protein LOC100267778 [Vitis vinifera]	gi|359485289|ref|XM_002276733.2|	208	2e-50	PREDICTED: Vitis vinifera uncharacterized LOC100267778 (LOC100267778), mRNA	sp|P49493|RR5_ODOSI	85.1	1e-16	30S ribosomal protein S5, chloroplastic OS=Odontella sinensis GN=rps5 PE=3 SV=1	PA4246	103	1e-21	COG0098	Ribosomal protein S5	K02988	1e-20	100	cme:CMK274C	small subunit ribosomal protein S5	GO:0006412//translation;GO:0009220//pyrimidine ribonucleotide biosynthetic process	GO:0003723//RNA binding;GO:0003735//structural constituent of ribosome	GO:0005840//ribosome;GO:0005739//mitochondrion;GO:0009536//plastid;GO:0005768//endosome;GO:0005802//trans-Golgi network;GO:0005794//Golgi apparatus
CL3098.Contig4_All	1990	5.0679	4.4535	5.0557	gi|38426488|gb|AAR20329.1|	776.5	0	squalene synthase [Artemisia annua]	gi|38426487|gb|AY445506.1|	2141	0	Artemisia annua squalene synthase mRNA, complete cds	sp|P53800|FDFT_NICBE	645	0	Squalene synthase OS=Nicotiana benthamiana PE=2 SV=1	YHR190w	278	3e-74	COG1562	Phytoene/squalene synthetase	K00801	0	662	gmx:547940	farnesyl-diphosphate farnesyltransferase [EC:2.5.1.21]	GO:0008610//lipid biosynthetic process	GO:0051996//squalene synthase activity;GO:0004310//farnesyl-diphosphate farnesyltransferase activity	GO:0016021//integral to membrane
CL31.Contig1_All	2250	7.8636	6.8484	6.7471	gi|359480067|ref|XP_002269414.2|	975.3	0	PREDICTED: WD repeat-containing protein 70-like [Vitis vinifera]	gi|356572298|ref|XM_003554258.1|	496	1e-137	PREDICTED: Glycine max WD repeat-containing protein 70-like (LOC100815380), mRNA	sp|Q3Y8L7|WDR69_CHLRE	75.1	2e-13	Outer row dynein assembly protein 16 OS=Chlamydomonas reinhardtii GN=ODA16 PE=1 SV=1	all0664	88.2	5e-17	COG2319	FOG: WD40 repeat	K03130	1e-18	93.6	bdi:100837458	transcription initiation factor TFIID subunit 5	GO:0048573//photoperiodism, flowering;GO:0006626//protein targeting to mitochondrion;GO:0006499//N-terminal protein myristoylation	GO:0000166//nucleotide binding	GO:0080008//Cul4-RING ubiquitin ligase complex;GO:0005737//cytoplasm
CL31.Contig2_All	1873	9.0449	8.4409	8.5368	gi|359480067|ref|XP_002269414.2|	963	0	PREDICTED: WD repeat-containing protein 70-like [Vitis vinifera]	gi|356572298|ref|XM_003554258.1|	480	1e-132	PREDICTED: Glycine max WD repeat-containing protein 70-like (LOC100815380), mRNA	sp|Q3Y8L7|WDR69_CHLRE	75.1	1e-13	Outer row dynein assembly protein 16 OS=Chlamydomonas reinhardtii GN=ODA16 PE=1 SV=1	all0664	88.2	4e-17	COG2319	FOG: WD40 repeat	K03130	1e-18	93.6	bdi:100837458	transcription initiation factor TFIID subunit 5	GO:0048573//photoperiodism, flowering;GO:0006626//protein targeting to mitochondrion;GO:0006499//N-terminal protein myristoylation	GO:0000166//nucleotide binding	GO:0080008//Cul4-RING ubiquitin ligase complex;GO:0005737//cytoplasm
CL3193.Contig6_All	2715	6.6634	6.7253	8.073	gi|225442501|ref|XP_002284003.1|	1422.5	0	PREDICTED: homeobox-leucine zipper protein ATHB-15-like isoform 1 [Vitis vinifera]	gi|18076737|emb|AJ312054.1|	999	0	Zinnia elegans mRNA for HD-Zip protein (hb2 gene), clone 2	sp|Q9ZU11|ATB15_ARATH	1328	0	Homeobox-leucine zipper protein ATHB-15 OS=Arabidopsis thaliana GN=ATHB-15 PE=1 SV=1	--	--	--	--	--	K09338	0	1326	aly:ARALYDRAFT_314555	homeobox-leucine zipper protein	GO:0006995//cellular response to nitrogen starvation;GO:0048519//negative regulation of biological process;GO:0007155//cell adhesion;GO:0009944//polarity specification of adaxial/abaxial axis;GO:0045010//actin nucleation;GO:0006355//regulation of transcription, DNA-dependent;GO:0010075//regulation of meristem growth;GO:0010051//xylem and phloem pattern formation;GO:0009965//leaf morphogenesis;GO:…	GO:0043565//sequence-specific DNA binding;GO:0003700//sequence-specific DNA binding transcription factor activity	GO:0005634//nucleus
CL3250.Contig1_All	1215	8.5917	9.2368	9.2416	gi|147864839|emb|CAN83633.1|	293.5	4e-78	hypothetical protein VITISV_023360 [Vitis vinifera]	gi|225315064|dbj|AK328214.1|	75.8	9e-11	Solanum lycopersicum cDNA, clone: LEFL2049L09, HTC in fruit	sp|Q9LT17|BBR_ARATH	73.9	2e-13	E3 ubiquitin ligase BIG BROTHER-related OS=Arabidopsis thaliana GN=BBR PE=2 SV=1	--	--	--	--	--	K14297	9e-23	106	mtr:MTR_1g066430	nuclear pore complex protein Nup98-Nup96	-	-	-
CL3252.Contig2_All	798	37.5813	40.963	46.9405	gi|24745620|dbj|BAC23034.1|	248.1	1e-64	actin depolymerizing factor 6 [Solanum tuberosum]	gi|351723548|ref|NM_001249074.1|	157	2e-35	Glycine max uncharacterized LOC100527688 (LOC100527688), mRNA	sp|Q8SAG3|ADF_VITVI	239	1e-63	Actin-depolymerizing factor OS=Vitis vinifera PE=2 SV=1	--	--	--	--	--	K05765	1e-65	247	vvi:100242532	cofilin	-	GO:0003779//actin binding	GO:0005622//intracellular
CL3254.Contig1_All	406	8.0621	6.1427	4.9782	gi|297738463|emb|CBI27664.3|	100.9	5e-21	unnamed protein product [Vitis vinifera]	gi|242381261|emb|FP096732.1|	77.8	7e-12	Phyllostachys edulis cDNA clone: bphylf045e11, full insert sequence	sp|Q653Z5|SPL11_ORYSJ	45.8	8e-06	Squamosa promoter-binding-like protein 11 OS=Oryza sativa subsp. japonica GN=SPL11 PE=2 SV=1	--	--	--	--	--	--	--	--	--	--	-	-	-
CL3254.Contig2_All	369	5.0346	3.5	3.7733	gi|255547696|ref|XP_002514905.1|	85.1	3e-16	LIGULELESS1 protein, putative [Ricinus communis] >gi|223545956|gb|EEF47459.1| LIGULELESS1 protein, putative [Ricinus communis]	gi|242381261|emb|FP096732.1|	77.8	7e-12	Phyllostachys edulis cDNA clone: bphylf045e11, full insert sequence	--	--	--	--	--	--	--	--	--	--	--	--	--	--	-	-	-
CL33.Contig1_All	1726	25.6786	17.6229	14.8847	gi|224057068|ref|XP_002299121.1|	626.7	3e-178	predicted protein [Populus trichocarpa] >gi|222846379|gb|EEE83926.1| predicted protein [Populus trichocarpa]	gi|225435709|ref|XM_002285658.1|	620	1e-174	PREDICTED: Vitis vinifera serine/threonine-protein phosphatase PP2A catalytic subunit-like (LOC100262164), mRNA	sp|Q10BT5|PP2A2_ORYSJ	607	8e-174	Serine/threonine-protein phosphatase PP2A-2 catalytic subunit OS=Oryza sativa subsp. japonica GN=PP2A2 PE=2 SV=1	SPBC16H5.07c	529	5e-150	COG0639	Diadenosine tetraphosphatase and related serine/threonine protein phosphatases	K04382	3e-179	626	pop:POPTR_547629	protein phosphatase 2 (formerly 2A), catalytic subunit [EC:3.1.3.16]	GO:0007049//cell cycle;GO:0006470//protein dephosphorylation	GO:0046872//metal ion binding;GO:0004722//protein serine/threonine phosphatase activity	GO:0005730//nucleolus;GO:0005886//plasma membrane;GO:0000159//protein phosphatase type 2A complex;GO:0005829//cytosol
CL3402.Contig4_All	4457	6.5401	6.1152	5.9456	gi|296087759|emb|CBI35015.3|	1533.5	0	unnamed protein product [Vitis vinifera]	gi|356573425|ref|XM_003554814.1|	145	4e-31	PREDICTED: Glycine max paired amphipathic helix protein Sin3-like 2-like (LOC100807181), mRNA	sp|Q9LFQ3|SNL2_ARATH	1319	0	Paired amphipathic helix protein Sin3-like 2 OS=Arabidopsis thaliana GN=SNL2 PE=1 SV=2	SPBC1734.16c	194	9e-49	COG5602	Histone deacetylase complex, SIN3 component	K11644	0	1514	vvi:100254234	paired amphipathic helix protein Sin3a	GO:0010048//vernalization response;GO:0045492//xylan biosynthetic process;GO:0016926//protein desumoylation;GO:0043481//anthocyanin accumulation in tissues in response to UV light;GO:0000956//nuclear-transcribed mRNA catabolic process;GO:0045892//negative regulation of transcription, DNA-dependent;GO:0050665//hydrogen peroxide biosynthetic process;GO:0010228//vegetative to reproductive phase tran…	GO:0005515//protein binding	GO:0005829//cytosol;GO:0005634//nucleus
CL3402.Contig7_All	3081	6.3169	6.5913	6.5309	gi|296087759|emb|CBI35015.3|	1215.7	0	unnamed protein product [Vitis vinifera]	gi|357496208|ref|XM_003618345.1|	206	9e-50	Medicago truncatula Paired amphipathic helix protein Sin3 (MTR_6g008970) mRNA, complete cds	sp|Q9LFQ3|SNL2_ARATH	1042	0	Paired amphipathic helix protein Sin3-like 2 OS=Arabidopsis thaliana GN=SNL2 PE=1 SV=2	SPBC1734.16c	194	8e-49	COG5602	Histone deacetylase complex, SIN3 component	K11644	0	1207	vvi:100254234	paired amphipathic helix protein Sin3a	GO:0010048//vernalization response;GO:0045492//xylan biosynthetic process;GO:0016926//protein desumoylation;GO:0043481//anthocyanin accumulation in tissues in response to UV light;GO:0000956//nuclear-transcribed mRNA catabolic process;GO:0045892//negative regulation of transcription, DNA-dependent;GO:0050665//hydrogen peroxide biosynthetic process;GO:0010228//vegetative to reproductive phase tran…	GO:0005515//protein binding	GO:0005829//cytosol;GO:0005634//nucleus
CL3427.Contig2_All	201	0.4401	0.6647	0.4469	--	--	--	--	--	--	--	--	--	--	--	--	--	--	--	--	--	--	--	--	--	--	-	-	-
CL3440.Contig1_All	589	2.1027	0.8317	1.2963	--	--	--	--	gi|147833324|emb|AM478506.2|	87.7	1e-14	Vitis vinifera contig VV78X109122.3, whole genome shotgun sequence	--	--	--	--	--	--	--	--	--	--	--	--	--	--	-	-	-
CL3527.Contig1_All	1517	10.2053	8.5723	9.0006	gi|42601216|gb|AAS21305.1|	549.7	4e-155	mitogen-activated protein kinase kinase 5 [Petroselinum crispum]	gi|332189094|gb|CP002684.1|	184	2e-43	Arabidopsis thaliana chromosome 1, complete sequence	sp|Q8RXG3|M2K5_ARATH	501	4e-142	Mitogen-activated protein kinase kinase 5 OS=Arabidopsis thaliana GN=MKK5 PE=1 SV=2	slr0152	125	3e-28	COG0515	Serine/threonine protein kinase	K13413	4e-154	543	pop:POPTR_563479	mitogen-activated protein kinase kinase 4/5, plant [EC:2.7.12.2]	GO:0031348//negative regulation of defense response;GO:0009595//detection of biotic stimulus;GO:0009605//response to external stimulus;GO:0009867//jasmonic acid mediated signaling pathway;GO:0009697//salicylic acid biosynthetic process;GO:0035304//regulation of protein dephosphorylation;GO:0009862//systemic acquired resistance, salicylic acid mediated signaling pathway;GO:0010227//floral organ ab…	GO:0004708//MAP kinase kinase activity;GO:0004674//protein serine/threonine kinase activity;GO:0005524//ATP binding	GO:0005634//nucleus;GO:0005739//mitochondrion
CL3621.Contig1_All	1071	44.2328	47.986	58.0824	gi|356553533|ref|XP_003545109.1|	373.2	3e-102	PREDICTED: syntaxin-51-like [Glycine max]	gi|225460840|ref|XM_002277064.1|	212	5e-52	PREDICTED: Vitis vinifera syntaxin-51-like (LOC100250369), mRNA	sp|Q94KK7|SYP52_ARATH	327	7e-90	Syntaxin-52 OS=Arabidopsis thaliana GN=SYP52 PE=1 SV=1	--	--	--	--	--	K08503	2e-92	337	aly:ARALYDRAFT_477131	syntaxin of plants SYP5	GO:0006623//protein targeting to vacuole;GO:0006944//cellular membrane fusion;GO:0006891//intra-Golgi vesicle-mediated transport;GO:0000902//cell morphogenesis;GO:0016049//cell growth	GO:0005484//SNAP receptor activity	GO:0005773//vacuole;GO:0005794//Golgi apparatus;GO:0010008//endosome membrane
CL3693.Contig1_All	1432	16.1549	14.2747	14.5846	gi|307136170|gb|ADN34011.1|	296.6	6e-79	translation initiation factor [Cucumis melo subsp. melo]	gi|317175243|gb|HQ527462.1|	67.9	3e-08	Gossypium herbaceum clone NBRI_D_EYT27PB02C2APH simple sequence repeat marker, mRNA sequence	--	--	--	--	--	--	--	--	--	--	--	--	--	--	-	-	-
CL3693.Contig2_All	1314	17.6056	15.1499	14.9372	gi|307136170|gb|ADN34011.1|	293.1	6e-78	translation initiation factor [Cucumis melo subsp. melo]	gi|317175243|gb|HQ527462.1|	67.9	2e-08	Gossypium herbaceum clone NBRI_D_EYT27PB02C2APH simple sequence repeat marker, mRNA sequence	--	--	--	--	--	--	--	--	--	--	--	--	--	--	-	-	-
CL3712.Contig1_All	619	8.2177	6.9068	10.9565	gi|225430686|ref|XP_002265637.1|	132.9	3e-30	PREDICTED: benzoate carboxyl methyltransferase [Vitis vinifera] >gi|147844218|emb|CAN80044.1| hypothetical protein VITISV_025095 [Vitis vinifera] >gi|297735113|emb|CBI17475.3| unnamed protein product [Vitis vinifera]	--	--	--	--	sp|Q9SBK6|JMT_BRARP	114	6e-26	Jasmonate O-methyltransferase OS=Brassica rapa subsp. pekinensis GN=JMT PE=1 SV=1	--	--	--	--	--	K08241	2e-26	117	vvi:100260930	jasmonate O-methyltransferase [EC:2.1.1.141]	GO:0050896//response to stimulus;GO:0009987//cellular process;GO:0008152//metabolic process	GO:0008168//methyltransferase activity	-
CL3824.Contig1_All	1153	1.1893	5.562	2.1035	gi|3551257|dbj|BAA32827.1|	71.6	2e-11	98b [Daucus carota]	gi|123692368|emb|AM483017.1|	109	6e-21	Vitis vinifera contig VV78X197097.16, whole genome shotgun sequence	sp|Q9SUP7|HMGB6_ARATH	236	1e-118	High mobility group B protein 6 OS=Arabidopsis thaliana GN=HMGB6 PE=2 SV=1	YKL032c	68.6	2e-11	COG5648	Chromatin-associated proteins containing the HMG domain	K09273	2e-81	164	ppp:PHYPADRAFT_210318	upstream-binding transcription factor	GO:0000911//cytokinesis by cell plate formation;GO:0051329//interphase of mitotic cell cycle;GO:0051322//anaphase;GO:0016572//histone phosphorylation;GO:0006084//acetyl-CoA metabolic process;GO:0000226//microtubule cytoskeleton organization;GO:0042127//regulation of cell proliferation;GO:0010583//response to cyclopentenone	GO:0003677//DNA binding;GO:0003700//sequence-specific DNA binding transcription factor activity	GO:0005634//nucleus
CL3863.Contig2_All	2150	23.7829	28.6679	29.8105	gi|399106776|gb|AFP20221.1|	851.3	0	MAP kinase [Nicotiana tabacum]	gi|359491015|ref|XM_003634154.1|	831	0	PREDICTED: Vitis vinifera mitogen-activated protein kinase 9-like (LOC100853858), mRNA	sp|Q9LM33|MPK8_ARATH	825	0	Mitogen-activated protein kinase 8 OS=Arabidopsis thaliana GN=MPK8 PE=2 SV=2	YBL016w	278	3e-74	COG0515	Serine/threonine protein kinase	K00924	0	678	ath:AT2G01450	[EC:2.7.1.-]	GO:0006007//glucose catabolic process;GO:0009753//response to jasmonic acid stimulus;GO:0006468//protein phosphorylation;GO:0009611//response to wounding;GO:0009738//abscisic acid mediated signaling pathway;GO:0042542//response to hydrogen peroxide;GO:0000165//MAPK cascade	GO:0004707//MAP kinase activity;GO:0005516//calmodulin binding;GO:0004713//protein tyrosine kinase activity;GO:0005524//ATP binding	GO:0005829//cytosol;GO:0005739//mitochondrion;GO:0005634//nucleus;GO:0005886//plasma membrane
CL3897.Contig3_All	326	2.3066	1.7759	3.3066	gi|359488331|ref|XP_002277688.2|	139.8	1e-32	PREDICTED: receptor-like protein kinase FERONIA [Vitis vinifera]	--	--	--	--	sp|Q9SCZ4|FERON_ARATH	131	8e-32	Receptor-like protein kinase FERONIA OS=Arabidopsis thaliana GN=FER PE=1 SV=1	lin1934_1	60.8	6e-10	COG0515	Serine/threonine protein kinase	K04733	5e-28	120	aly:ARALYDRAFT_916421	interleukin-1 receptor-associated kinase 4 [EC:2.7.11.1]	GO:0006468//protein phosphorylation;GO:0009856//pollination;GO:0007275//multicellular organismal development	GO:0004672//protein kinase activity	GO:0005886//plasma membrane
CL3899.Contig2_All	1205	2.7531	2.9567	3.3173	gi|359488516|ref|XP_003633769.1|	323.9	2e-87	PREDICTED: receptor-like protein kinase FERONIA-like [Vitis vinifera]	--	--	--	--	sp|Q9FID9|Y5389_ARATH	306	1e-83	Probable receptor-like protein kinase At5g38990 OS=Arabidopsis thaliana GN=At5g38990 PE=2 SV=1	YAR019c	91.7	2e-18	COG0515	Serine/threonine protein kinase	K04733	3e-83	306	ath:AT5G38990	interleukin-1 receptor-associated kinase 4 [EC:2.7.11.1]	GO:0006468//protein phosphorylation	GO:0004674//protein serine/threonine kinase activity;GO:0005524//ATP binding	GO:0016023//cytoplasmic membrane-bounded vesicle
CL39.Contig3_All	2855	6.817	5.5532	5.0342	gi|224064484|ref|XP_002301499.1|	146.4	2e-33	predicted protein [Populus trichocarpa] >gi|222843225|gb|EEE80772.1| predicted protein [Populus trichocarpa]	gi|225445066|ref|XM_002280263.1|	109	2e-20	PREDICTED: Vitis vinifera arginyl-tRNA synthetase-like (LOC100261143), mRNA	--	--	--	--	all3717	169	2e-41	COG0018	Arginyl-tRNA synthetase	K01887	6e-85	314	pop:POPTR_711240	arginyl-tRNA synthetase [EC:6.1.1.19]	GO:0010162//seed dormancy process;GO:0010564//regulation of cell cycle process;GO:0006164//purine nucleotide biosynthetic process;GO:0048366//leaf development;GO:0048825//cotyledon development;GO:0006418//tRNA aminoacylation for protein translation	GO:0000166//nucleotide binding;GO:0004812//aminoacyl-tRNA ligase activity	GO:0005829//cytosol;GO:0005739//mitochondrion;GO:0009570//chloroplast stroma
CL39.Contig4_All	2084	5.5397	4.103	4.0733	gi|255546293|ref|XP_002514206.1|	151	6e-35	arginyl-tRNA synthetase, putative [Ricinus communis] >gi|223546662|gb|EEF48160.1| arginyl-tRNA synthetase, putative [Ricinus communis]	gi|225316545|dbj|AK322498.1|	60	9e-06	Solanum lycopersicum cDNA, clone: LEFL1038CB05, HTC in leaf	--	--	--	--	sll0502	68.9	3e-11	COG0018	Arginyl-tRNA synthetase	K01887	6e-36	150	rcu:RCOM_1049090	arginyl-tRNA synthetase [EC:6.1.1.19]	GO:0048827//phyllome development;GO:0006418//tRNA aminoacylation for protein translation;GO:0009793//embryo development ending in seed dormancy	GO:0000166//nucleotide binding;GO:0004812//aminoacyl-tRNA ligase activity	GO:0005739//mitochondrion;GO:0009570//chloroplast stroma
CL3949.Contig2_All	427	31.0769	16.3746	14.9364	gi|18416332|ref|NP_567700.1|	57.8	5e-08	uncharacterized protein [Arabidopsis thaliana] >gi|332659494|gb|AEE84894.1| uncharacterized protein [Arabidopsis thaliana]	gi|359489206|ref|XM_002273435.2|	65.9	3e-08	PREDICTED: Vitis vinifera uncharacterized LOC100266818, transcript variant 1 (LOC100266818), mRNA	--	--	--	--	--	--	--	--	--	--	--	--	--	--	-	-	-
CL4026.Contig2_All	475	3.9111	3.1877	4.6333	--	--	--	--	--	--	--	--	--	--	--	--	--	--	--	--	--	--	--	--	--	--	-	-	-
CL4026.Contig3_All	397	2.7854	3.0288	3.9597	--	--	--	--	--	--	--	--	--	--	--	--	--	--	--	--	--	--	--	--	--	--	-	-	-
CL4124.Contig3_All	407	2.1736	1.7507	1.1035	gi|224145378|ref|XP_002325620.1|	186.8	7e-47	predicted protein [Populus trichocarpa] >gi|222862495|gb|EEF00002.1| predicted protein [Populus trichocarpa]	gi|224030038|gb|BT067198.1|	69.9	2e-09	Zea mays full-length cDNA clone ZM_BFb0285D05 mRNA, complete cds	--	--	--	--	--	--	--	--	--	--	--	--	--	--	-	-	GO:0016021//integral to membrane
CL4124.Contig4_All	317	1.6744	1.2644	1.4169	gi|224145378|ref|XP_002325620.1|	111.3	3e-24	predicted protein [Populus trichocarpa] >gi|222862495|gb|EEF00002.1| predicted protein [Populus trichocarpa]	gi|224030038|gb|BT067198.1|	69.9	1e-09	Zea mays full-length cDNA clone ZM_BFb0285D05 mRNA, complete cds	--	--	--	--	--	--	--	--	--	--	--	--	--	--	-	-	GO:0016021//integral to membrane
CL4274.Contig1_All	775	0.1141	5.574	1.6227	gi|225436424|ref|XP_002272312.1|	178.7	7e-44	PREDICTED: histone H2B.2 [Vitis vinifera] >gi|297734885|emb|CBI17119.3| unnamed protein product [Vitis vinifera]	--	--	--	--	sp|Q9SGE3|H2B2_ARATH	163	1e-40	Histone H2B.2 OS=Arabidopsis thaliana GN=At1g08170 PE=2 SV=1	--	--	--	--	--	K11252	7e-45	178	vvi:100253395	histone H2B	-	-	GO:0044446//intracellular organelle part;GO:0005694//chromosome;GO:0005634//nucleus
CL4321.Contig6_All	1937	5.3436	4.4144	4.823	gi|359495935|ref|XP_003635118.1|	740	0	PREDICTED: ribosome biogenesis protein BOP1 homolog [Vitis vinifera]	gi|359495934|ref|XM_003635070.1|	107	4e-20	PREDICTED: Vitis vinifera ribosome biogenesis protein BOP1 homolog (LOC100251720), mRNA	sp|A8ID74|BOP1_CHLRE	406	3e-113	Ribosome biogenesis protein BOP1 homolog OS=Chlamydomonas reinhardtii GN=CHLREDRAFT_111274 PE=3 SV=2	YDR170c	54.3	7e-07	COG5307	SEC7 domain proteins	K14824	0	739	vvi:100251720	ribosome biogenesis protein ERB1	GO:0042254//ribosome biogenesis;GO:0051604//protein maturation	GO:0000166//nucleotide binding	GO:0005634//nucleus;GO:0005829//cytosol
CL4333.Contig1_All	975	3.3572	2.9233	3.1325	gi|302143274|emb|CBI21835.3|	270	3e-71	unnamed protein product [Vitis vinifera]	gi|224093307|ref|XM_002309840.1|	133	4e-28	Populus trichocarpa histone acetyltransferase (HAF902), mRNA	sp|Q8LRK9|TAF1A_ARATH	234	7e-62	Transcription initiation factor TFIID subunit 1-A OS=Arabidopsis thaliana GN=HAF1 PE=2 SV=1	XF1267	50.1	6e-06	COG5297	Cellobiohydrolase A (1,4-beta-cellobiosidase A)	K03125	7e-70	262	rcu:RCOM_0884950	transcription initiation factor TFIID subunit 1	GO:0009294//DNA mediated transformation;GO:0000394//RNA splicing, via endonucleolytic cleavage and ligation;GO:0006366//transcription from RNA polymerase II promoter	GO:0003676//nucleic acid binding;GO:0016740//transferase activity	-
CL4333.Contig2_All	1129	2.9776	2.4851	3.3019	gi|302143274|emb|CBI21835.3|	324.7	1e-87	unnamed protein product [Vitis vinifera]	gi|224093307|ref|XM_002309840.1|	133	4e-28	Populus trichocarpa histone acetyltransferase (HAF902), mRNA	sp|Q8LRK9|TAF1A_ARATH	264	8e-71	Transcription initiation factor TFIID subunit 1-A OS=Arabidopsis thaliana GN=HAF1 PE=2 SV=1	XF1267	50.1	7e-06	COG5297	Cellobiohydrolase A (1,4-beta-cellobiosidase A)	K03125	7e-83	305	rcu:RCOM_0884950	transcription initiation factor TFIID subunit 1	GO:0009294//DNA mediated transformation;GO:0000394//RNA splicing, via endonucleolytic cleavage and ligation;GO:0006366//transcription from RNA polymerase II promoter	GO:0003676//nucleic acid binding;GO:0016740//transferase activity	-
CL4374.Contig1_All	2270	9.5091	8.2988	8.2706	gi|359495990|ref|XP_003635128.1|	529.2	9e-149	PREDICTED: uncharacterized protein LOC100255037 [Vitis vinifera]	gi|147773501|emb|AM427487.2|	99.6	1e-17	Vitis vinifera contig VV78X242878.11, whole genome shotgun sequence	--	--	--	--	--	--	--	--	--	--	--	--	--	--	-	-	-
CL4374.Contig2_All	2106	8.0652	8.5855	8.2961	gi|224074155|ref|XP_002304277.1|	520.4	4e-146	predicted protein [Populus trichocarpa] >gi|222841709|gb|EEE79256.1| predicted protein [Populus trichocarpa]	gi|147773501|emb|AM427487.2|	99.6	1e-17	Vitis vinifera contig VV78X242878.11, whole genome shotgun sequence	--	--	--	--	--	--	--	--	--	--	--	--	--	--	-	-	-
CL4550.Contig3_All	1704	12.7195	19.889	8.8036	gi|224131934|ref|XP_002321214.1|	902.1	0	predicted protein [Populus trichocarpa] >gi|118486311|gb|ABK94997.1| unknown [Populus trichocarpa] >gi|222861987|gb|EEE99529.1| predicted protein [Populus trichocarpa]	gi|390132091|gb|JQ797697.1|	1132	0	Ipomoea batatas ADP-glucose pyrophosphorylase small subunit 2 mRNA, complete cds	sp|Q9M462|GLGS_BRANA	891	0	Glucose-1-phosphate adenylyltransferase small subunit, chloroplastic OS=Brassica napus GN=AGPS1 PE=2 SV=1	all4645	589	4e-168	COG0448	ADP-glucose pyrophosphorylase	K00975	0	902	pop:POPTR_573143	glucose-1-phosphate adenylyltransferase [EC:2.7.7.27]	GO:0048573//photoperiodism, flowering;GO:0019252//starch biosynthetic process;GO:0005978//glycogen biosynthetic process	GO:0008878//glucose-1-phosphate adenylyltransferase activity	GO:0005829//cytosol;GO:0030931//heterotetrameric ADPG pyrophosphorylase complex;GO:0009501//amyloplast;GO:0009570//chloroplast stroma;GO:0048046//apoplast
CL4564.Contig1_All	670	182.279	145.901	213.309	gi|357453923|ref|XP_003597242.1|	161.4	9e-39	hypothetical protein MTR_2g094410 [Medicago truncatula] >gi|355486290|gb|AES67493.1| hypothetical protein MTR_2g094410 [Medicago truncatula]	gi|225316197|dbj|AK322150.1|	77.8	1e-11	Solanum lycopersicum cDNA, clone: LEFL1034AD10, HTC in leaf	--	--	--	--	--	--	--	--	--	--	--	--	--	--	-	-	-
CL4564.Contig2_All	580	135.444	126.233	172.223	gi|225435321|ref|XP_002285165.1|	190.3	1e-47	PREDICTED: uncharacterized protein LOC100253658 [Vitis vinifera]	gi|225316197|dbj|AK322150.1|	77.8	1e-11	Solanum lycopersicum cDNA, clone: LEFL1034AD10, HTC in leaf	--	--	--	--	--	--	--	--	--	--	--	--	--	--	-	-	GO:0005634//nucleus
CL4645.Contig2_All	301	2.0573	1.9234	1.7906	--	--	--	--	gi|225429229|ref|XM_002263559.1|	61.9	3e-07	PREDICTED: Vitis vinifera DNA polymerase V-like (LOC100268096), mRNA	--	--	--	--	--	--	--	--	--	K02331	3e-06	48.1	vvi:100268096	DNA polymerase phi subunit [EC:2.7.7.7]	-	-	-
CL4651.Contig1_All	264	2.6808	2.0243	2.2117	--	--	--	--	--	--	--	--	--	--	--	--	--	--	--	--	--	--	--	--	--	--	-	-	-
CL4654.Contig4_All	279	1.5854	1.5962	2.5757	gi|183238687|gb|ACC60973.1|	176.4	1e-43	beta-ketoacyl-CoA synthase [Helianthus annuus]	gi|356508343|ref|XM_003522869.1|	79.8	1e-12	PREDICTED: Glycine max 3-ketoacyl-CoA synthase 11-like, transcript variant 2 (LOC100794273), mRNA	sp|Q5XEP9|KCS17_ARATH	155	7e-39	3-ketoacyl-CoA synthase 17 OS=Arabidopsis thaliana GN=KCS17 PE=2 SV=2	--	--	--	--	--	K15397	2e-44	175	vvi:100263066	3-ketoacyl-CoA synthase [EC:2.3.1.-]	GO:0006633//fatty acid biosynthetic process;GO:0009611//response to wounding;GO:0009409//response to cold;GO:0010345//suberin biosynthetic process;GO:0006970//response to osmotic stress;GO:0009416//response to light stimulus	GO:0009922//fatty acid elongase activity	GO:0016020//membrane
CL4677.Contig1_All	907	2.097	2.406	2.5255	gi|147820620|emb|CAN67649.1|	157.5	2e-37	hypothetical protein VITISV_005080 [Vitis vinifera]	gi|356560281|ref|XM_003548374.1|	83.8	3e-13	PREDICTED: Glycine max DEAD-box ATP-dependent RNA helicase 31-like (LOC100799999), mRNA	sp|Q9FNM7|RH26_ARATH	126	1e-29	DEAD-box ATP-dependent RNA helicase 26 OS=Arabidopsis thaliana GN=RH26 PE=1 SV=2	SPAC1F7.02c	67.8	2e-11	COG0513	Superfamily II DNA and RNA helicases	K14776	1e-14	79	smo:SELMODRAFT_99840	ATP-dependent RNA helicase DDX10/DBP4 [EC:3.6.4.13]	GO:0009628//response to abiotic stimulus;GO:0009220//pyrimidine ribonucleotide biosynthetic process;GO:0006950//response to stress	GO:0003676//nucleic acid binding;GO:0000166//nucleotide binding;GO:0004386//helicase activity	GO:0009507//chloroplast
CL4677.Contig2_All	984	1.6632	2.7155	2.4648	gi|147820620|emb|CAN67649.1|	157.5	2e-37	hypothetical protein VITISV_005080 [Vitis vinifera]	gi|356560281|ref|XM_003548374.1|	83.8	3e-13	PREDICTED: Glycine max DEAD-box ATP-dependent RNA helicase 31-like (LOC100799999), mRNA	sp|Q9FNM7|RH26_ARATH	126	2e-29	DEAD-box ATP-dependent RNA helicase 26 OS=Arabidopsis thaliana GN=RH26 PE=1 SV=2	SPAC1F7.02c	67.8	3e-11	COG0513	Superfamily II DNA and RNA helicases	K14776	1e-14	79	smo:SELMODRAFT_99840	ATP-dependent RNA helicase DDX10/DBP4 [EC:3.6.4.13]	GO:0009628//response to abiotic stimulus;GO:0009220//pyrimidine ribonucleotide biosynthetic process;GO:0006950//response to stress	GO:0003676//nucleic acid binding;GO:0000166//nucleotide binding;GO:0004386//helicase activity	GO:0009507//chloroplast
CL4677.Contig3_All	2228	4.2089	4.7973	5.9066	gi|147820620|emb|CAN67649.1|	832.4	0	hypothetical protein VITISV_005080 [Vitis vinifera]	gi|359489722|ref|XM_002277084.2|	367	3e-98	PREDICTED: Vitis vinifera DEAD-box ATP-dependent RNA helicase 31-like (LOC100258444), mRNA	sp|Q9FNM7|RH26_ARATH	761	0	DEAD-box ATP-dependent RNA helicase 26 OS=Arabidopsis thaliana GN=RH26 PE=1 SV=2	SPAC1F7.02c	249	1e-65	COG0513	Superfamily II DNA and RNA helicases	K13179	6e-71	267	vvi:100242258	ATP-dependent RNA helicase DDX18/HAS1 [EC:3.6.4.13]	GO:0009414//response to water deprivation;GO:0009651//response to salt stress;GO:0009409//response to cold;GO:0009220//pyrimidine ribonucleotide biosynthetic process	GO:0003723//RNA binding;GO:0008026//ATP-dependent helicase activity;GO:0005524//ATP binding	GO:0005739//mitochondrion;GO:0009507//chloroplast
CL4677.Contig5_All	1001	1.3257	2.358	3.1409	gi|147820620|emb|CAN67649.1|	157.5	2e-37	hypothetical protein VITISV_005080 [Vitis vinifera]	gi|356560281|ref|XM_003548374.1|	83.8	3e-13	PREDICTED: Glycine max DEAD-box ATP-dependent RNA helicase 31-like (LOC100799999), mRNA	sp|Q9FNM7|RH26_ARATH	126	2e-29	DEAD-box ATP-dependent RNA helicase 26 OS=Arabidopsis thaliana GN=RH26 PE=1 SV=2	SPAC1F7.02c	67.8	3e-11	COG0513	Superfamily II DNA and RNA helicases	K14776	1e-14	79	smo:SELMODRAFT_99840	ATP-dependent RNA helicase DDX10/DBP4 [EC:3.6.4.13]	GO:0009628//response to abiotic stimulus;GO:0009220//pyrimidine ribonucleotide biosynthetic process;GO:0006950//response to stress	GO:0003676//nucleic acid binding;GO:0000166//nucleotide binding;GO:0004386//helicase activity	GO:0009507//chloroplast
CL4777.Contig2_All	2240	5.8056	6.3223	6.5567	gi|218196923|gb|EEC79350.1|	951.4	0	hypothetical protein OsI_20217 [Oryza sativa Indica Group]	gi|225434890|ref|XM_002283237.1|	482	1e-133	PREDICTED: Vitis vinifera ATP-dependent zinc metalloprotease FTSH 10, mitochondrial-like (LOC100250187), mRNA	sp|Q0DHL4|FTSH8_ORYSJ	951	0	ATP-dependent zinc metalloprotease FTSH 8, mitochondrial OS=Oryza sativa subsp. japonica GN=FTSH8 PE=3 SV=1	YER017c	609	5e-174	COG0465	ATP-dependent Zn proteases	K08956	0	951	osa:4339002	AFG3 family protein [EC:3.4.24.-]	GO:0006200//ATP catabolic process;GO:0006508//proteolysis;GO:0030163//protein catabolic process	GO:0008270//zinc ion binding;GO:0004176//ATP-dependent peptidase activity;GO:0004222//metalloendopeptidase activity;GO:0005524//ATP binding;GO:0008568//microtubule-severing ATPase activity	GO:0005739//mitochondrion;GO:0016021//integral to membrane;GO:0009535//chloroplast thylakoid membrane
CL4822.Contig2_All	859	12.5129	12.1317	11.8691	gi|225459645|ref|XP_002285880.1|	75.5	1e-12	PREDICTED: auxilin-related protein 1-like [Vitis vinifera]	--	--	--	--	sp|P13983|EXTN_TOBAC	51.2	7e-07	Extensin OS=Nicotiana tabacum GN=HRGPNT3 PE=2 SV=1	--	--	--	--	--	K14692	2e-09	61.2	smo:SELMODRAFT_453384	solute carrier family 30 (zinc transporter), member 5	-	-	-
CL4828.Contig1_All	2805	21.0204	15.2736	18.9745	gi|356511728|ref|XP_003524575.1|	1034.6	0	PREDICTED: sphingoid long-chain bases kinase 1-like [Glycine max]	gi|359497092|ref|XM_002262933.2|	280	7e-72	PREDICTED: Vitis vinifera sphingoid long-chain bases kinase 1-like (LOC100248174), partial mRNA	sp|Q9LRB0|LCBK1_ARATH	967	0	Sphingoid long-chain bases kinase 1 OS=Arabidopsis thaliana GN=LCBK1 PE=1 SV=1	SPAC4A8.07c	117	1e-25	COG1597	Sphingosine kinase and enzymes related to eukaryotic diacylglycerol kinase	K04718	6e-26	118	aly:ARALYDRAFT_492730	sphingosine kinase [EC:2.7.1.91]	GO:0010413//glucuronoxylan metabolic process;GO:0016926//protein desumoylation;GO:0010228//vegetative to reproductive phase transition of meristem;GO:0030148//sphingolipid biosynthetic process;GO:0006486//protein glycosylation;GO:0045492//xylan biosynthetic process;GO:0007205//protein kinase C-activating G-protein coupled receptor signaling pathway;GO:0016310//phosphorylation;GO:0009630//gravitro…	GO:0004143//diacylglycerol kinase activity;GO:0017050//D-erythro-sphingosine kinase activity;GO:0001729//ceramide kinase activity	GO:0005739//mitochondrion;GO:0009536//plastid;GO:0005886//plasma membrane
CL4860.Contig4_All	1904	5.622	5.0055	5.1189	gi|255581071|ref|XP_002531351.1|	64.3	7e-09	protein binding protein, putative [Ricinus communis] >gi|223529049|gb|EEF31035.1| protein binding protein, putative [Ricinus communis]	gi|356525308|ref|XM_003531219.1|	73.8	6e-10	PREDICTED: Glycine max BTB/POZ domain-containing protein At3g09030-like (LOC100816537), mRNA	sp|Q9S7R7|Y3903_ARATH	456	2e-128	BTB/POZ domain-containing protein At3g09030 OS=Arabidopsis thaliana GN=At3g09030 PE=2 SV=1	--	--	--	--	--	K03006	4e-09	61.6	sbi:SORBI_07g003680	DNA-directed RNA polymerase II subunit RPB1 [EC:2.7.7.6]	GO:0006813//potassium ion transport	GO:0005249//voltage-gated potassium channel activity	GO:0008076//voltage-gated potassium channel complex;GO:0005634//nucleus
CL4864.Contig1_All	2193	58.2913	17.2209	11.1415	gi|224101561|ref|XP_002312331.1|	1145.2	0	predicted protein [Populus trichocarpa] >gi|222852151|gb|EEE89698.1| predicted protein [Populus trichocarpa]	gi|359477115|ref|XM_002278145.2|	1106	0	PREDICTED: Vitis vinifera ATP-citrate synthase beta chain protein 2-like (LOC100267071), mRNA	sp|Q9FGX1|ACLB2_ARATH	1135	0	ATP-citrate synthase beta chain protein 2 OS=Arabidopsis thaliana GN=ACLB-2 PE=1 SV=1	SPBC1703.07_1	390	5e-108	COG0074	Succinyl-CoA synthetase, alpha subunit	K01648	0	1145	pop:POPTR_656642	ATP citrate (pro-S)-lyase [EC:2.3.3.8]	GO:0016132//brassinosteroid biosynthetic process;GO:0006085//acetyl-CoA biosynthetic process;GO:0016926//protein desumoylation;GO:0010228//vegetative to reproductive phase transition of meristem;GO:0044262//cellular carbohydrate metabolic process;GO:0050665//hydrogen peroxide biosynthetic process;GO:0016126//sterol biosynthetic process	GO:0016829//lyase activity;GO:0003878//ATP citrate synthase activity;GO:0004775//succinate-CoA ligase (ADP-forming) activity;GO:0000166//nucleotide binding;GO:0048037//cofactor binding	GO:0005829//cytosol;GO:0009346//citrate lyase complex;GO:0005886//plasma membrane
CL4878.Contig3_All	886	3.9939	4.1217	4.1569	gi|388491710|gb|AFK33921.1|	219.6	4e-56	unknown [Lotus japonicus]	gi|225316703|dbj|AK328667.1|	208	7e-51	Solanum lycopersicum cDNA, clone: LEFL3028M22, HTC in root	--	--	--	--	SPCC4G3.02	108	9e-24	COG0537	Diadenosine tetraphosphate (Ap4A) hydrolase and other HIT family hydrolases	K01522	8e-57	218	gmx:100305764	bis(5'-adenosyl)-triphosphatase [EC:3.6.1.29]	GO:0009117//nucleotide metabolic process	GO:0047710//bis(5'-adenosyl)-triphosphatase activity;GO:0043530//adenosine 5'-monophosphoramidase activity;GO:0047627//adenylylsulfatase activity	GO:0005829//cytosol
CL4890.Contig1_All	242	1.4622	1.8403	1.856	gi|356533181|ref|XP_003535146.1|	55.8	2e-07	PREDICTED: uncharacterized protein LOC100819068 [Glycine max]	gi|302846854|ref|XM_002954917.1|	58	4e-06	Volvox carteri f. nagariensis hypothetical protein, mRNA	sp|F4JP36|HAP2_ARATH	45.1	1e-05	Protein HAPLESS 2 OS=Arabidopsis thaliana GN=HAP2 PE=2 SV=1	--	--	--	--	--	--	--	--	--	--	-	-	-
CL4950.Contig2_All	2120	16.6499	13.6755	13.0929	gi|118486938|gb|ABK95302.1|	896.3	0	unknown [Populus trichocarpa]	gi|359480239|ref|XM_002281339.2|	597	1e-167	PREDICTED: Vitis vinifera bifunctional aminoacyl-tRNA synthetase-like (LOC100253683), mRNA	--	--	--	--	SPBC19C7.06_2	578	2e-164	COG0442	Prolyl-tRNA synthetase	K01881	0	895	mtr:MTR_7g110660	prolyl-tRNA synthetase [EC:6.1.1.15]	GO:0006433//prolyl-tRNA aminoacylation	GO:0004827//proline-tRNA ligase activity;GO:0005524//ATP binding	GO:0009506//plasmodesma;GO:0016020//membrane;GO:0005829//cytosol
CL4970.Contig1_All	827	2.8882	2.154	1.8465	gi|18398123|ref|NP_565388.1|	305.8	4e-82	uncharacterized protein [Arabidopsis thaliana] >gi|20198032|gb|AAD22294.2| expressed protein [Arabidopsis thaliana] >gi|330251406|gb|AEC06500.1| uncharacterized protein [Arabidopsis thaliana]	gi|357483648|ref|XM_003612063.1|	167	2e-38	Medicago truncatula Coiled-coil domain-containing protein 90B (MTR_5g021410) mRNA, complete cds	--	--	--	--	--	--	--	--	--	--	--	--	--	--	-	GO:0046872//metal ion binding	GO:0005774//vacuolar membrane;GO:0005739//mitochondrion;GO:0009507//chloroplast;GO:0005886//plasma membrane
CL4970.Contig7_All	671	1.4503	1.6593	1.8073	gi|224103329|ref|XP_002313013.1|	253.4	1e-66	predicted protein [Populus trichocarpa] >gi|222849421|gb|EEE86968.1| predicted protein [Populus trichocarpa]	gi|145360005|ref|NM_127199.3|	135	6e-29	Arabidopsis thaliana uncharacterized protein (AT2G16460) mRNA, complete cds	--	--	--	--	--	--	--	--	--	--	--	--	--	--	-	GO:0046872//metal ion binding	GO:0005774//vacuolar membrane;GO:0005739//mitochondrion;GO:0009507//chloroplast;GO:0005886//plasma membrane
CL5.Contig2_All	1693	18.7068	16.2566	15.7319	gi|225439898|ref|XP_002279479.1|	505.4	1e-141	PREDICTED: protein IQ-DOMAIN 1-like [Vitis vinifera]	gi|225315186|dbj|AK328336.1|	109	9e-21	Solanum lycopersicum cDNA, clone: LEFL2052K14, HTC in fruit	sp|Q9SF32|IQD1_ARATH	323	2e-88	Protein IQ-DOMAIN 1 OS=Arabidopsis thaliana GN=IQD1 PE=1 SV=1	--	--	--	--	--	--	--	--	--	--	GO:0048767//root hair elongation;GO:0006007//glucose catabolic process	-	GO:0005886//plasma membrane
CL5017.Contig1_All	204	0.8673	0.6549	1.321	--	--	--	--	--	--	--	--	--	--	--	--	--	--	--	--	--	--	--	--	--	--	-	-	-
CL5017.Contig2_All	1270	30.2664	38.0123	33.8802	gi|225458647|ref|XP_002284845.1|	90.1	2e-105	PREDICTED: uncharacterized protein LOC100254049 [Vitis vinifera]	--	--	--	--	--	--	--	--	--	--	--	--	--	--	--	--	--	--	GO:0048767//root hair elongation	-	GO:0005886//plasma membrane;GO:0009507//chloroplast;GO:0005634//nucleus
CL5042.Contig2_All	637	7.2217	7.271	7.756	gi|224091673|ref|XP_002309326.1|	283.1	1e-75	predicted protein [Populus trichocarpa] >gi|222855302|gb|EEE92849.1| predicted protein [Populus trichocarpa]	gi|359484784|ref|XM_003633113.1|	170	1e-39	PREDICTED: Vitis vinifera uncharacterized LOC100255894 (LOC100255894), mRNA	--	--	--	--	--	--	--	--	--	K02183	1e-59	227	mtr:MTR_4g128600	calmodulin	-	GO:0005516//calmodulin binding	GO:0005634//nucleus
CL5049.Contig3_All	1353	10.6904	9.6113	8.465	gi|1841468|emb|CAA71881.1|	624.4	1e-177	Tyrosyl-tRNA synthetase [Nicotiana tabacum]	gi|145361647|ref|NM_179891.3|	250	3e-63	Arabidopsis thaliana tyrosyl-tRNA synthetase (AT2G33840) mRNA, complete cds	--	--	--	--	SSO0078	229	6e-60	COG0162	Tyrosyl-tRNA synthetase	K01866	5e-176	615	vvi:100251282	tyrosyl-tRNA synthetase [EC:6.1.1.1]	GO:0006437//tyrosyl-tRNA aminoacylation	GO:0004831//tyrosine-tRNA ligase activity;GO:0005524//ATP binding	GO:0009536//plastid
CL5088.Contig2_All	1485	22.2504	20.7529	20.0829	gi|359482848|ref|XP_002280211.2|	599.4	4e-170	PREDICTED: nucleosome assembly protein 1-like 1-like isoform 1 [Vitis vinifera] >gi|297743095|emb|CBI35962.3| unnamed protein product [Vitis vinifera]	gi|359482847|ref|XM_002280175.2|	317	2e-83	PREDICTED: Vitis vinifera nucleosome assembly protein 1-like 1-like, transcript variant 1 (LOC100261732), mRNA	sp|Q0WMN5|Y3913_ARATH	61.2	1e-09	Uncharacterized protein At3g49140 OS=Arabidopsis thaliana GN=At3g49140 PE=1 SV=2	YOR054c	75.1	3e-13	COG0452	Phosphopantothenoylcysteine synthetase/decarboxylase	K11279	2e-167	587	vvi:100267878	nucleosome assembly protein 1-like 1	GO:0009294//DNA mediated transformation;GO:0046686//response to cadmium ion;GO:0006334//nucleosome assembly;GO:0006289//nucleotide-excision repair	GO:0003682//chromatin binding	GO:0005737//cytoplasm;GO:0005886//plasma membrane;GO:0005634//nucleus
CL5088.Contig5_All	1510	21.0326	18.8461	18.5309	gi|359482848|ref|XP_002280211.2|	599.4	4e-170	PREDICTED: nucleosome assembly protein 1-like 1-like isoform 1 [Vitis vinifera] >gi|297743095|emb|CBI35962.3| unnamed protein product [Vitis vinifera]	gi|359482847|ref|XM_002280175.2|	317	2e-83	PREDICTED: Vitis vinifera nucleosome assembly protein 1-like 1-like, transcript variant 1 (LOC100261732), mRNA	sp|Q0WMN5|Y3913_ARATH	61.2	1e-09	Uncharacterized protein At3g49140 OS=Arabidopsis thaliana GN=At3g49140 PE=1 SV=2	YOR054c	75.1	3e-13	COG0452	Phosphopantothenoylcysteine synthetase/decarboxylase	K11279	2e-167	587	vvi:100267878	nucleosome assembly protein 1-like 1	GO:0009294//DNA mediated transformation;GO:0046686//response to cadmium ion;GO:0006334//nucleosome assembly;GO:0006289//nucleotide-excision repair	GO:0003682//chromatin binding	GO:0005737//cytoplasm;GO:0005886//plasma membrane;GO:0005634//nucleus
CL5140.Contig2_All	3181	5.2145	2.534	2.5274	gi|296082822|emb|CBI21827.3|	501.5	3e-140	unnamed protein product [Vitis vinifera]	gi|225470797|ref|XM_002262965.1|	119	2e-23	PREDICTED: Vitis vinifera leucine-rich repeat receptor-like serine/threonine-protein kinase At1g17230-like (LOC100264502), mRNA	sp|Q9SHI2|Y1723_ARATH	474	1e-133	Leucine-rich repeat receptor-like serine/threonine-protein kinase At1g17230 OS=Arabidopsis thaliana GN=At1g17230 PE=2 SV=2	YAR019c	99	5e-20	COG0515	Serine/threonine protein kinase	K00924	2e-71	269	aly:ARALYDRAFT_476729	[EC:2.7.1.-]	GO:0010103//stomatal complex morphogenesis;GO:0006468//protein phosphorylation;GO:0007165//signal transduction;GO:0002237//response to molecule of bacterial origin;GO:0048443//stamen development	GO:0004713//protein tyrosine kinase activity;GO:0016491//oxidoreductase activity;GO:0004674//protein serine/threonine kinase activity;GO:0005524//ATP binding	GO:0016023//cytoplasmic membrane-bounded vesicle;GO:0016021//integral to membrane;GO:0005576//extracellular region
CL516.Contig5_All	3626	26.1176	43.3925	45.8309	gi|224115502|ref|XP_002332150.1|	949.5	0	argonaute protein group [Populus trichocarpa] >gi|222875200|gb|EEF12331.1| argonaute protein group [Populus trichocarpa]	gi|156564452|gb|AC209107.1|	67.9	7e-08	Populus trichocarpa clone POP088-K16, complete sequence	sp|Q9SHF3|AGO2_ARATH	809	0	Protein argonaute 2 OS=Arabidopsis thaliana GN=AGO2 PE=1 SV=1	XF0818	116	3e-25	COG2730	Endoglucanase	K11596	9e-144	509	sbi:SORBI_06g025560	argonaute	GO:0042742//defense response to bacterium;GO:0051607//defense response to virus	GO:0035197//siRNA binding	-
CL5207.Contig1_All	2003	6.6912	5.6474	5.3816	gi|225444645|ref|XP_002277600.1|	620.9	2e-176	PREDICTED: DEAD-box ATP-dependent RNA helicase 17-like [Vitis vinifera]	gi|359484622|ref|XM_002277564.2|	161	3e-36	PREDICTED: Vitis vinifera DEAD-box ATP-dependent RNA helicase 17-like (LOC100250946), mRNA	sp|Q7XJN0|RH17_ARATH	556	2e-158	DEAD-box ATP-dependent RNA helicase 17 OS=Arabidopsis thaliana GN=RH17 PE=2 SV=1	SPAC1F7.02c	207	4e-53	COG0513	Superfamily II DNA and RNA helicases	K14806	2e-177	620	vvi:100250946	ATP-dependent RNA helicase DDX31/DBP7 [EC:3.6.4.13]	GO:0000085//G2 phase of mitotic cell cycle;GO:0006312//mitotic recombination;GO:0006406//mRNA export from nucleus;GO:0051604//protein maturation;GO:0010388//cullin deneddylation;GO:0009640//photomorphogenesis;GO:0009560//embryo sac egg cell differentiation;GO:0042991//transcription factor import into nucleus;GO:0006626//protein targeting to mitochondrion	GO:0008026//ATP-dependent helicase activity;GO:0003723//RNA binding;GO:0005524//ATP binding	GO:0005634//nucleus
CL5228.Contig1_All	2321	11.8348	12.0883	14.0877	gi|296082437|emb|CBI21442.3|	876.3	0	unnamed protein product [Vitis vinifera]	gi|225438669|ref|XM_002281982.1|	206	7e-50	PREDICTED: Vitis vinifera uncharacterized LOC100244129 (LOC100244129), mRNA	--	--	--	--	--	--	--	--	--	--	--	--	--	--	GO:0006623//protein targeting to vacuole;GO:0006486//protein glycosylation;GO:0016192//vesicle-mediated transport	-	GO:0005634//nucleus
CL5228.Contig2_All	258	2.9146	2.9345	2.7854	gi|297794329|ref|XP_002865049.1|	63.9	7e-10	hypothetical protein ARALYDRAFT_496919 [Arabidopsis lyrata subsp. lyrata] >gi|297310884|gb|EFH41308.1| hypothetical protein ARALYDRAFT_496919 [Arabidopsis lyrata subsp. lyrata]	--	--	--	--	--	--	--	--	--	--	--	--	--	--	--	--	--	--	GO:0006623//protein targeting to vacuole;GO:0006486//protein glycosylation;GO:0016192//vesicle-mediated transport	-	GO:0005634//nucleus
CL5304.Contig4_All	315	1.1234	0.5655	1.4259	gi|297743237|emb|CBI36104.3|	88.2	3e-17	unnamed protein product [Vitis vinifera]	--	--	--	--	--	--	--	--	--	--	--	--	--	--	--	--	--	--	GO:0006355//regulation of transcription, DNA-dependent	GO:0003723//RNA binding;GO:0003824//catalytic activity	GO:0009507//chloroplast;GO:0005739//mitochondrion
CL5318.Contig2_All	1131	6.4922	6.379	9.0146	gi|124360195|gb|ABN08208.1|	312.4	7e-84	Remorin, C-terminal region [Medicago truncatula]	gi|317106765|dbj|AP011977.1|	117	2e-23	Jatropha curcas DNA, clone: JMS10C05, complete sequence	sp|Q9M2D8|Y3126_ARATH	84	1e-16	Uncharacterized protein At3g61260 OS=Arabidopsis thaliana GN=At3g61260 PE=1 SV=1	--	--	--	--	--	K08818	1e-16	85.5	vvi:100246062	cell division cycle 2-like [EC:2.7.11.22]	-	-	-
CL5343.Contig1_All	837	2.3781	2.2879	1.7708	gi|356561951|ref|XP_003549239.1|	62.8	6e-09	PREDICTED: UPF0197 transmembrane protein C11orf10 [Glycine max]	--	--	--	--	--	--	--	--	--	--	--	--	--	--	--	--	--	--	-	GO:0004672//protein kinase activity	GO:0009507//chloroplast
CL5354.Contig2_All	237	4.106	3.1945	5.3063	--	--	--	--	--	--	--	--	--	--	--	--	--	--	--	--	--	--	--	--	--	--	-	-	-
CL5354.Contig3_All	231	0	0.1928	0.1944	--	--	--	--	--	--	--	--	--	--	--	--	--	--	--	--	--	--	--	--	--	--	-	-	-
CL5368.Contig4_All	1422	23.3918	71.719	84.0485	gi|224117268|ref|XP_002331738.1|	178.7	1e-43	predicted protein [Populus trichocarpa] >gi|118487434|gb|ABK95545.1| unknown [Populus trichocarpa] >gi|222874264|gb|EEF11395.1| predicted protein [Populus trichocarpa]	gi|297816307|ref|XM_002875991.1|	63.9	4e-07	Arabidopsis lyrata subsp. lyrata expressed protein, mRNA	sp|Q00451|PRF1_SOLLC	48.9	7e-06	36.4 kDa proline-rich protein OS=Solanum lycopersicum GN=TPRP-F1 PE=2 SV=1	--	--	--	--	--	--	--	--	--	--	GO:0016558//protein import into peroxisome matrix;GO:0006635//fatty acid beta-oxidation	-	GO:0016023//cytoplasmic membrane-bounded vesicle
CL5399.Contig2_All	2310	9.2487	8.5406	8.7884	gi|225441082|ref|XP_002264567.1|	986.9	0	PREDICTED: uncharacterized protein C19orf29 homolog [Vitis vinifera] >gi|297740019|emb|CBI30201.3| unnamed protein product [Vitis vinifera]	gi|225441081|ref|XM_002264531.1|	333	5e-88	PREDICTED: Vitis vinifera uncharacterized LOC100245238 (LOC100245238), mRNA	sp|P0CB26|Y1089_ARATH	59.7	7e-09	Uncharacterized protein At1g10890 OS=Arabidopsis thaliana GN=At1g10890 PE=1 SV=1	SPAC140.02	55.5	4e-07	COG0724	RNA-binding proteins (RRM domain)	K11984	3e-10	65.9	ppp:PHYPADRAFT_233757	U4/U6.U5 tri-snRNP-associated protein 1	GO:0000956//nuclear-transcribed mRNA catabolic process;GO:0051604//protein maturation	-	GO:0005634//nucleus;GO:0009536//plastid
CL5528.Contig1_All	1467	3.1358	4.9787	1.9595	gi|356521606|ref|XP_003529445.1|	469.9	4e-131	PREDICTED: uncharacterized protein LOC100804417 [Glycine max]	gi|356521605|ref|XM_003529397.1|	73.8	4e-10	PREDICTED: Glycine max uncharacterized protein LOC100804417 (LOC100804417), mRNA	--	--	--	--	--	--	--	--	--	--	--	--	--	--	GO:0007000//nucleolus organization;GO:0009957//epidermal cell fate specification;GO:0016458//gene silencing;GO:0000911//cytokinesis by cell plate formation;GO:0045010//actin nucleation;GO:0008283//cell proliferation;GO:0051225//spindle assembly;GO:0006084//acetyl-CoA metabolic process;GO:0051322//anaphase;GO:0009909//regulation of flower development;GO:0034968//histone lysine methylation;GO:00002…	-	GO:0043229//intracellular organelle
CL5533.Contig5_All	830	1.3323	2.1999	3.355	--	--	--	--	--	--	--	--	--	--	--	--	--	--	--	--	--	--	--	--	--	--	-	-	-
CL5533.Contig6_All	1032	5.1862	5.2648	8.6608	--	--	--	--	--	--	--	--	--	--	--	--	--	--	--	--	--	--	--	--	--	--	-	-	-
CL559.Contig1_All	2743	33.8479	33.5268	45.5856	gi|37223342|gb|AAQ90244.1|	916	0	DEM2 [Solanum lycopersicum]	gi|144228149|gb|EF490996.1|	587	1e-164	Chrysanthemum x morifolium DREBa mRNA, complete cds	sp|P40781|CYPR4_CYNCA	855	0	Protein CYPRO4 OS=Cynara cardunculus GN=CYPRO4 PE=2 SV=1	SPBC1685.14c	124	9e-28	COG5167	Protein involved in vacuole import and degradation	K09286	1e-21	103	ath:AT4G25480	EREBP-like factor	-	-	GO:0005737//cytoplasm
CL559.Contig4_All	1367	19.6411	14.139	14.7852	--	--	--	--	gi|330414617|gb|HM635748.1|	89.7	7e-15	Galax urceolata clone Glx20 microsatellite sequence	--	--	--	--	--	--	--	--	--	--	--	--	--	--	-	-	-
CL559.Contig7_All	675	33.6825	24.2797	31.0075	--	--	--	--	gi|330414617|gb|HM635748.1|	77.8	1e-11	Galax urceolata clone Glx20 microsatellite sequence	--	--	--	--	--	--	--	--	--	--	--	--	--	--	-	-	-
CL561.Contig3_All	2642	39.0762	27.122	25.8912	gi|225456501|ref|XP_002280957.1|	1127.1	0	PREDICTED: glycyl-tRNA synthetase 1, mitochondrial-like [Vitis vinifera]	gi|297851411|ref|XM_002893541.1|	353	6e-94	Arabidopsis lyrata subsp. lyrata glycyl-tRNA synthetase, mRNA	sp|O23627|SYGM1_ARATH	1106	0	Glycine--tRNA ligase 1, mitochondrial OS=Arabidopsis thaliana GN=GLYRS-1 PE=2 SV=1	SPAC3F10.03	572	9e-163	COG0423	Glycyl-tRNA synthetase (class II)	K01880	0	1127	vvi:100257704	glycyl-tRNA synthetase [EC:6.1.1.14]	GO:0010498//proteasomal protein catabolic process;GO:0006426//glycyl-tRNA aminoacylation;GO:0007010//cytoskeleton organization;GO:0006094//gluconeogenesis;GO:0046686//response to cadmium ion	GO:0005524//ATP binding;GO:0004820//glycine-tRNA ligase activity	GO:0005829//cytosol;GO:0005739//mitochondrion;GO:0005768//endosome;GO:0005802//trans-Golgi network;GO:0005794//Golgi apparatus
CL5627.Contig2_All	1869	20.4952	24.0664	24.8482	gi|359485008|ref|XP_002269013.2|	739.6	0	PREDICTED: probable mitochondrial chaperone BCS1-B-like [Vitis vinifera] >gi|297735391|emb|CBI17831.3| unnamed protein product [Vitis vinifera]	gi|219818222|gb|FJ149286.1|	107	4e-20	Daucus carota subsp. sativus clone BAC C001C12 genomic sequence	sp|O19922|FTSH_CYACA	58.2	2e-08	ATP-dependent zinc metalloprotease FtsH OS=Cyanidium caldarium GN=ftsH PE=3 SV=1	SPAC644.07	121	4e-27	COG0465	ATP-dependent Zn proteases	K08900	0	697	pop:POPTR_262253	mitochondrial chaperone BCS1	GO:0009407//toxin catabolic process;GO:0010583//response to cyclopentenone	GO:0016887//ATPase activity;GO:0005524//ATP binding	GO:0005886//plasma membrane
CL564.Contig2_All	1128	0.9803	1.0265	1.0751	gi|255559438|ref|XP_002520739.1|	104	4e-21	protein binding protein, putative [Ricinus communis] >gi|223540124|gb|EEF41701.1| protein binding protein, putative [Ricinus communis]	gi|297812114|ref|XM_002873895.1|	89.7	6e-15	Arabidopsis lyrata subsp. lyrata armadillo/beta-catenin repeat family protein, mRNA	sp|B9DHT4|ARIA_ARATH	275	7e-83	ARM REPEAT PROTEIN INTERACTING WITH ABF2 OS=Arabidopsis thaliana GN=ARIA PE=1 SV=2	SPCC962.03c	62.8	1e-09	COG5064	Karyopherin (importin) alpha	K08332	7e-16	83.2	vcn:VOLCADRAFT_41528	vacuolar protein 8	GO:0009651//response to salt stress;GO:0010187//negative regulation of seed germination;GO:0000956//nuclear-transcribed mRNA catabolic process;GO:0009737//response to abscisic acid stimulus	GO:0005515//protein binding	GO:0005737//cytoplasm;GO:0005634//nucleus;GO:0005886//plasma membrane
CL5647.Contig1_All	239	1.8507	2.9814	1.3155	--	--	--	--	gi|206581646|gb|EU744972.1|	61.9	2e-07	Cynara cardunculus clone CELMS-56 microsatellite sequence	--	--	--	--	--	--	--	--	--	--	--	--	--	--	-	-	-
CL5647.Contig3_All	264	2.3457	2.3617	3.5727	--	--	--	--	--	--	--	--	--	--	--	--	--	--	--	--	--	--	--	--	--	--	-	-	-
CL5652.Contig1_All	2341	6.5943	6.0876	7.118	gi|147772904|emb|CAN75715.1|	534.6	2e-150	hypothetical protein VITISV_034017 [Vitis vinifera] >gi|297743845|emb|CBI36728.3| unnamed protein product [Vitis vinifera]	gi|359484060|ref|XM_002270541.2|	137	6e-29	PREDICTED: Vitis vinifera E3 ubiquitin ligase BIG BROTHER-related-like (LOC100247631), mRNA	sp|Q9LT17|BBR_ARATH	234	2e-61	E3 ubiquitin ligase BIG BROTHER-related OS=Arabidopsis thaliana GN=BBR PE=2 SV=1	--	--	--	--	--	K14297	4e-12	72	mtr:MTR_1g066430	nuclear pore complex protein Nup98-Nup96	-	-	-
CL5738.Contig3_All	333	1.1955	1.0699	1.4837	gi|224123314|ref|XP_002319048.1|	56.6	1e-07	predicted protein [Populus trichocarpa] >gi|222857424|gb|EEE94971.1| predicted protein [Populus trichocarpa]	--	--	--	--	sp|Q9SXD1|PPR91_ARATH	104	1e-23	Pentatricopeptide repeat-containing protein At1g62670, mitochondrial OS=Arabidopsis thaliana GN=At1g62670 PE=2 SV=2	--	--	--	--	--	K15336	5e-12	67.4	vvi:100259391	tRNA (cytosine38-C5)-methyltransferase [EC:2.1.1.204]	GO:0000966//RNA 5'-end processing	GO:0003723//RNA binding	GO:0005739//mitochondrion
CL5883.Contig1_All	499	10.2826	4.8194	5.9406	gi|224139126|ref|XP_002326774.1|	144.1	8e-34	predicted protein [Populus trichocarpa] >gi|222834096|gb|EEE72573.1| predicted protein [Populus trichocarpa]	--	--	--	--	--	--	--	--	--	--	--	--	--	--	--	--	--	--	GO:0015996//chlorophyll catabolic process	-	-
CL589.Contig3_All	240	1.1058	0.9278	1.31	--	--	--	--	--	--	--	--	--	--	--	--	--	--	--	--	--	--	--	--	--	--	-	-	-
CL5912.Contig2_All	2154	12.3827	12.5913	14.9089	gi|255555987|ref|XP_002519028.1|	820.1	0	RNA polymerase-associated protein RTF1, putative [Ricinus communis] >gi|223541691|gb|EEF43239.1| RNA polymerase-associated protein RTF1, putative [Ricinus communis]	gi|359496598|ref|XM_003635226.1|	172	9e-40	PREDICTED: Vitis vinifera uncharacterized LOC100854406 (LOC100854406), mRNA	sp|Q53RK8|RH21_ORYSJ	63.2	6e-10	DEAD-box ATP-dependent RNA helicase 21 OS=Oryza sativa subsp. japonica GN=Os03g0708600 PE=2 SV=1	SPBC651.09c	135	2e-31	COG5296	Transcription factor involved in TATA site selection and in elongation by RNA polymerase II	K15178	0	820	rcu:RCOM_0935630	RNA polymerase-associated protein RTF1	GO:0009630//gravitropism;GO:0009910//negative regulation of flower development;GO:0048573//photoperiodism, flowering;GO:0051276//chromosome organization;GO:0030422//production of siRNA involved in RNA interference;GO:0008284//positive regulation of cell proliferation;GO:0030244//cellulose biosynthetic process;GO:0048193//Golgi vesicle transport;GO:0035196//production of miRNAs involved in gene si…	-	GO:0005634//nucleus
CL5928.Contig1_All	3333	29.316	17.5172	15.8878	gi|359497545|ref|XP_003635561.1|	1606.7	0	PREDICTED: leucine-rich repeat receptor-like serine/threonine-protein kinase BAM1-like [Vitis vinifera]	gi|357476602|ref|XM_003608539.1|	609	1e-171	Medicago truncatula Receptor-like protein kinase (MTR_4g097880) mRNA, complete cds	sp|O49545|BAME1_ARATH	1546	0	Leucine-rich repeat receptor-like serine/threonine-protein kinase BAM1 OS=Arabidopsis thaliana GN=BAM1 PE=1 SV=1	alr0124_1	128	7e-29	COG4886	Leucine-rich repeat (LRR) protein	K00924	0	1057	ath:AT1G75820	[EC:2.7.1.-]	GO:0048767//root hair elongation;GO:0010480//microsporocyte differentiation;GO:0009414//response to water deprivation;GO:0043481//anthocyanin accumulation in tissues in response to UV light;GO:0009825//multidimensional cell growth;GO:0000186//activation of MAPKK activity;GO:0007169//transmembrane receptor protein tyrosine kinase signaling pathway;GO:0009926//auxin polar transport;GO:0010075//regu…	GO:0033612//receptor serine/threonine kinase binding;GO:0004709//MAP kinase kinase kinase activity;GO:0043621//protein self-association;GO:0005524//ATP binding;GO:0043169//cation binding;GO:0032440//2-alkenal reductase [NAD(P)] activity;GO:0016161//beta-amylase activity	GO:0009570//chloroplast stroma;GO:0005829//cytosol;GO:0005886//plasma membrane;GO:0016021//integral to membrane;GO:0005634//nucleus
CL5928.Contig2_All	3257	28.9136	25.1183	22.3399	gi|359497545|ref|XP_003635561.1|	1528.5	0	PREDICTED: leucine-rich repeat receptor-like serine/threonine-protein kinase BAM1-like [Vitis vinifera]	gi|339790468|dbj|AB645826.1|	502	1e-138	Solanum lycopersicum SlpCLV1 mRNA for leucine rich repeat receptor protein kinase CLAVATA1, complete cds, cultivar: Pritz	sp|O49545|BAME1_ARATH	1508	0	Leucine-rich repeat receptor-like serine/threonine-protein kinase BAM1 OS=Arabidopsis thaliana GN=BAM1 PE=1 SV=1	alr0124_1	135	4e-31	COG4886	Leucine-rich repeat (LRR) protein	K00924	0	1018	ath:AT1G75820	[EC:2.7.1.-]	GO:0048767//root hair elongation;GO:0010480//microsporocyte differentiation;GO:0009414//response to water deprivation;GO:0043481//anthocyanin accumulation in tissues in response to UV light;GO:0009825//multidimensional cell growth;GO:0000186//activation of MAPKK activity;GO:0007169//transmembrane receptor protein tyrosine kinase signaling pathway;GO:0009926//auxin polar transport;GO:0010075//regu…	GO:0033612//receptor serine/threonine kinase binding;GO:0004709//MAP kinase kinase kinase activity;GO:0043621//protein self-association;GO:0005524//ATP binding;GO:0043169//cation binding;GO:0032440//2-alkenal reductase [NAD(P)] activity;GO:0016161//beta-amylase activity	GO:0009570//chloroplast stroma;GO:0005829//cytosol;GO:0005886//plasma membrane;GO:0016021//integral to membrane;GO:0005634//nucleus
CL6079.Contig1_All	299	3.8463	5.0641	4.9571	--	--	--	--	--	--	--	--	--	--	--	--	--	--	--	--	--	--	--	--	--	--	-	-	-
CL6083.Contig2_All	827	2.9952	2.6387	2.3896	gi|224127180|ref|XP_002320007.1|	229.2	5e-59	predicted protein [Populus trichocarpa] >gi|222860780|gb|EEE98322.1| predicted protein [Populus trichocarpa]	gi|357482522|ref|XM_003611500.1|	73.8	2e-10	Medicago truncatula BSD domain containing protein (MTR_5g015180) mRNA, complete cds	--	--	--	--	--	--	--	--	--	--	--	--	--	--	-	-	-
CL6226.Contig2_All	375	3.8925	4.0378	3.2338	gi|255540083|ref|XP_002511106.1|	132.5	1e-30	conserved hypothetical protein [Ricinus communis] >gi|223550221|gb|EEF51708.1| conserved hypothetical protein [Ricinus communis]	gi|356508856|ref|XM_003523122.1|	69.9	2e-09	PREDICTED: Glycine max uncharacterized protein LOC100795139 (LOC100795139), mRNA	--	--	--	--	--	--	--	--	--	--	--	--	--	--	-	-	GO:0009536//plastid;GO:0005886//plasma membrane
CL6343.Contig2_All	1593	15.3274	12.4686	13.9564	gi|224100073|ref|XP_002311732.1|	754.6	0	predicted protein [Populus trichocarpa] >gi|222851552|gb|EEE89099.1| predicted protein [Populus trichocarpa]	gi|359488630|ref|XM_002270875.2|	357	2e-95	PREDICTED: Vitis vinifera serine/threonine protein phosphatase 2A 57 kDa regulatory subunit B' theta isoform-like (LOC100250839), mRNA	sp|Q9LU89|2A5N_ARATH	714	0	Serine/threonine protein phosphatase 2A 59 kDa regulatory subunit B' eta isoform OS=Arabidopsis thaliana GN=B'ETA PE=2 SV=1	--	--	--	--	--	K11584	0	754	pop:POPTR_872596	protein phosphatase 2 (formerly 2A), regulatory subunit B'	GO:0007165//signal transduction	GO:0008601//protein phosphatase type 2A regulator activity	GO:0005730//nucleolus;GO:0005777//peroxisome;GO:0000159//protein phosphatase type 2A complex;GO:0005829//cytosol;GO:0009536//plastid
CL6451.Contig6_All	1018	4.0409	3.4123	3.0002	gi|357476777|ref|XP_003608674.1|	139	1e-31	hypothetical protein MTR_4g100570 [Medicago truncatula] >gi|355509729|gb|AES90871.1| hypothetical protein MTR_4g100570 [Medicago truncatula]	gi|147802510|emb|AM484275.2|	61.9	1e-06	Vitis vinifera contig VV78X134573.4, whole genome shotgun sequence	sp|Q9LUI1|LRX6_ARATH	40.8	5e-06	Leucine-rich repeat extensin-like protein 6 OS=Arabidopsis thaliana GN=LRX6 PE=2 SV=1	--	--	--	--	--	--	--	--	--	--	-	-	-
CL6475.Contig4_All	2669	6.2811	5.3061	3.7695	gi|356534929|ref|XP_003536003.1|	314.3	6e-84	PREDICTED: probable galacturonosyltransferase-like 7-like [Glycine max]	gi|332189094|gb|CP002684.1|	67.9	5e-08	Arabidopsis thaliana chromosome 1, complete sequence	sp|Q8VYF4|GATL7_ARATH	304	2e-82	Probable galacturonosyltransferase-like 7 OS=Arabidopsis thaliana GN=GATL7 PE=2 SV=1	--	--	--	--	--	K13648	2e-06	53.1	rcu:RCOM_1612930	alpha-1,4-galacturonosyltransferase [EC:2.4.1.43]	GO:0016051//carbohydrate biosynthetic process	GO:0047262//polygalacturonate 4-alpha-galacturonosyltransferase activity	GO:0016023//cytoplasmic membrane-bounded vesicle;GO:0005794//Golgi apparatus
CL6525.Contig1_All	1605	33.8154	25.7774	30.8104	gi|402746980|gb|AFQ94050.1|	546.2	5e-154	auxin response factor 1 [Camellia sinensis]	gi|402746979|gb|JX307853.1|	276	6e-71	Camellia sinensis auxin response factor 1 mRNA, complete cds	sp|Q9FGV1|ARFH_ARATH	383	2e-106	Auxin response factor 8 OS=Arabidopsis thaliana GN=ARF8 PE=2 SV=2	YKL032c	62.4	2e-09	COG5648	Chromatin-associated proteins containing the HMG domain	K14486	4e-32	137	aly:ARALYDRAFT_488981	auxin response factor	GO:0048519//negative regulation of biological process;GO:0048507//meristem development;GO:0006355//regulation of transcription, DNA-dependent;GO:0009909//regulation of flower development;GO:0009887//organ morphogenesis;GO:0010051//xylem and phloem pattern formation;GO:0048481//ovule development;GO:0009733//response to auxin stimulus;GO:0048439//flower morphogenesis;GO:0009855//determination of bi…	GO:0003700//sequence-specific DNA binding transcription factor activity	-
CL6525.Contig3_All	4381	17.5376	13.3675	14.5784	gi|402746980|gb|AFQ94050.1|	539.3	1e-151	auxin response factor 1 [Camellia sinensis]	gi|402746979|gb|JX307853.1|	912	0	Camellia sinensis auxin response factor 1 mRNA, complete cds	sp|Q9FGV1|ARFH_ARATH	1035	0	Auxin response factor 8 OS=Arabidopsis thaliana GN=ARF8 PE=2 SV=2	YKL032c	62.4	7e-09	COG5648	Chromatin-associated proteins containing the HMG domain	K14486	8e-172	603	rcu:RCOM_1597120	auxin response factor	GO:0048519//negative regulation of biological process;GO:0048507//meristem development;GO:0006355//regulation of transcription, DNA-dependent;GO:0009909//regulation of flower development;GO:0009887//organ morphogenesis;GO:0010051//xylem and phloem pattern formation;GO:0048481//ovule development;GO:0048439//flower morphogenesis;GO:0009855//determination of bilateral symmetry;GO:0009734//auxin medi…	GO:0003677//DNA binding;GO:0046983//protein dimerization activity;GO:0003700//sequence-specific DNA binding transcription factor activity	GO:0005634//nucleus
CL6577.Contig3_All	854	8.9087	13.0371	14.9364	gi|224144053|ref|XP_002325169.1|	303.9	1e-81	predicted protein [Populus trichocarpa] >gi|222866603|gb|EEF03734.1| predicted protein [Populus trichocarpa]	gi|225319520|dbj|AK329899.1|	91.7	1e-15	Solanum lycopersicum cDNA, clone: LEFL3160G11, HTC in root	sp|Q69QZ0|P2C27_ORYSJ	280	1e-75	Probable protein phosphatase 2C 27 OS=Oryza sativa subsp. japonica GN=Os02g0799000 PE=2 SV=1	SPCC1223.11	104	2e-22	COG0631	Serine/threonine protein phosphatase	K01090	2e-63	240	osa:4341433	protein phosphatase [EC:3.1.3.16]	GO:0006470//protein dephosphorylation	GO:0046872//metal ion binding;GO:0003677//DNA binding;GO:0004722//protein serine/threonine phosphatase activity	GO:0008287//protein serine/threonine phosphatase complex
CL6623.Contig1_All	1547	7.5199	7.2545	7.6067	gi|225434853|ref|XP_002282322.1|	456.8	3e-127	PREDICTED: uncharacterized protein LOC100241598 [Vitis vinifera] >gi|297746029|emb|CBI16085.3| unnamed protein product [Vitis vinifera]	gi|349714142|emb|FQ386797.1|	97.6	3e-17	Vitis vinifera clone SS0AEB28YL07	--	--	--	--	SPBC28F2.09	82.8	1e-15	COG5149	Transcription initiation factor IIA, large chain	K03122	4e-128	456	vvi:100241598	transcription initiation factor TFIIA large subunit	GO:0006351//transcription, DNA-dependent	-	GO:0005634//nucleus
CL6629.Contig1_All	841	5.8907	9.32	8.3847	gi|42568646|ref|NP_200713.2|	100.1	3e-20	uncharacterized protein [Arabidopsis thaliana] >gi|332009751|gb|AED97134.1| uncharacterized protein [Arabidopsis thaliana]	--	--	--	--	--	--	--	--	--	--	--	--	--	--	--	--	--	--	-	-	-
CL6629.Contig2_All	1089	5.1585	8.4244	9.486	gi|42568646|ref|NP_200713.2|	100.1	5e-20	uncharacterized protein [Arabidopsis thaliana] >gi|332009751|gb|AED97134.1| uncharacterized protein [Arabidopsis thaliana]	--	--	--	--	--	--	--	--	--	--	--	--	--	--	--	--	--	--	-	-	-
CL68.Contig1_All	1373	1.1598	1.1677	1.2104	gi|356526825|ref|XP_003532017.1|	486.5	3e-136	PREDICTED: GPN-loop GTPase 3-like [Glycine max]	gi|225468098|ref|XM_002266054.1|	426	1e-116	PREDICTED: Vitis vinifera GPN-loop GTPase 3 homolog-like (LOC100264657), mRNA	--	--	--	--	SPAC144.07c	178	2e-44	COG1100	GTPase SAR1 and related small G proteins	K06883	4e-137	486	gmx:100815483		-	GO:0005524//ATP binding	-
CL68.Contig2_All	1196	1.1835	1.6012	0.8637	gi|356526825|ref|XP_003532017.1|	486.5	3e-136	PREDICTED: GPN-loop GTPase 3-like [Glycine max]	gi|225468098|ref|XM_002266054.1|	426	1e-116	PREDICTED: Vitis vinifera GPN-loop GTPase 3 homolog-like (LOC100264657), mRNA	--	--	--	--	SPAC144.07c	178	2e-44	COG1100	GTPase SAR1 and related small G proteins	K06883	3e-137	486	gmx:100815483		-	GO:0005524//ATP binding	-
CL68.Contig3_All	1171	1.0199	0.9508	0.9205	gi|356526825|ref|XP_003532017.1|	486.5	3e-136	PREDICTED: GPN-loop GTPase 3-like [Glycine max]	gi|225468098|ref|XM_002266054.1|	426	1e-116	PREDICTED: Vitis vinifera GPN-loop GTPase 3 homolog-like (LOC100264657), mRNA	--	--	--	--	SPAC144.07c	178	2e-44	COG1100	GTPase SAR1 and related small G proteins	K06883	3e-137	486	gmx:100815483		-	GO:0005524//ATP binding	-
CL68.Contig4_All	1156	0.4592	0.8861	0.9325	gi|356526825|ref|XP_003532017.1|	486.5	3e-136	PREDICTED: GPN-loop GTPase 3-like [Glycine max]	gi|225468098|ref|XM_002266054.1|	426	1e-116	PREDICTED: Vitis vinifera GPN-loop GTPase 3 homolog-like (LOC100264657), mRNA	--	--	--	--	SPAC144.07c	178	2e-44	COG1100	GTPase SAR1 and related small G proteins	K06883	3e-137	486	gmx:100815483		-	GO:0005524//ATP binding	-
CL68.Contig5_All	1363	0.8438	1.4703	1.4499	gi|356526825|ref|XP_003532017.1|	486.5	3e-136	PREDICTED: GPN-loop GTPase 3-like [Glycine max]	gi|225468098|ref|XM_002266054.1|	426	1e-116	PREDICTED: Vitis vinifera GPN-loop GTPase 3 homolog-like (LOC100264657), mRNA	--	--	--	--	SPAC144.07c	178	2e-44	COG1100	GTPase SAR1 and related small G proteins	K06883	4e-137	486	gmx:100815483		-	GO:0005524//ATP binding	-
CL68.Contig6_All	1186	0.8578	0.8637	1.0982	gi|356526825|ref|XP_003532017.1|	486.5	3e-136	PREDICTED: GPN-loop GTPase 3-like [Glycine max]	gi|225468098|ref|XM_002266054.1|	426	1e-116	PREDICTED: Vitis vinifera GPN-loop GTPase 3 homolog-like (LOC100264657), mRNA	--	--	--	--	SPAC144.07c	178	2e-44	COG1100	GTPase SAR1 and related small G proteins	K06883	3e-137	486	gmx:100815483		-	GO:0005524//ATP binding	-
CL6838.Contig1_All	3371	7.5449	6.3942	5.6093	gi|225434343|ref|XP_002276484.1|	1502.3	0	PREDICTED: insulin-degrading enzyme-like [Vitis vinifera]	gi|225434342|ref|XM_002276448.1|	266	1e-67	PREDICTED: Vitis vinifera insulin-degrading enzyme-like (LOC100251821), mRNA	sp|O22941|PXM16_ARATH	487	2e-137	Zinc-metallopeptidase, peroxisomal OS=Arabidopsis thaliana GN=PXM16 PE=2 SV=1	YLR389c	485	2e-136	COG1025	Secreted/periplasmic Zn-dependent peptidases, insulinase-like	K01411	0	1502	vvi:100251821	nardilysin [EC:3.4.24.61]	GO:0006508//proteolysis	GO:0004222//metalloendopeptidase activity;GO:0008270//zinc ion binding	GO:0009507//chloroplast;GO:0005829//cytosol
CL6838.Contig2_All	2035	5.6296	4.7051	4.657	gi|225434343|ref|XP_002276484.1|	939.9	0	PREDICTED: insulin-degrading enzyme-like [Vitis vinifera]	gi|225434342|ref|XM_002276448.1|	266	8e-68	PREDICTED: Vitis vinifera insulin-degrading enzyme-like (LOC100251821), mRNA	sp|O22941|PXM16_ARATH	328	9e-90	Zinc-metallopeptidase, peroxisomal OS=Arabidopsis thaliana GN=PXM16 PE=2 SV=1	VC2072	347	4e-95	COG1025	Secreted/periplasmic Zn-dependent peptidases, insulinase-like	K01411	0	939	vvi:100251821	nardilysin [EC:3.4.24.61]	GO:0006508//proteolysis	GO:0004222//metalloendopeptidase activity;GO:0008270//zinc ion binding	GO:0009507//chloroplast;GO:0005829//cytosol
CL6867.Contig1_All	1017	4.0884	3.3281	4.5047	--	--	--	--	--	--	--	--	--	--	--	--	--	--	--	--	--	--	--	--	--	--	-	-	-
CL689.Contig1_All	2244	15.4145	12.1855	10.0877	gi|359488099|ref|XP_002266715.2|	1044.3	0	PREDICTED: ankyrin repeat domain-containing protein 13B-like [Vitis vinifera]	gi|225321973|dbj|AK325994.1|	289	6e-75	Solanum lycopersicum cDNA, clone: LEFL2001CC03, HTC in fruit	sp|P24152|EXTN_SORBI	57	4e-08	Extensin OS=Sorghum bicolor GN=HRGP PE=3 SV=1	--	--	--	--	--	--	--	--	--	--	-	-	GO:0005886//plasma membrane
CL6892.Contig4_All	1193	1.3348	1.4559	1.1294	gi|255555491|ref|XP_002518782.1|	127.5	3e-28	conserved hypothetical protein [Ricinus communis] >gi|223542163|gb|EEF43707.1| conserved hypothetical protein [Ricinus communis]	--	--	--	--	sp|Q0JP99|Y1341_ORYSJ	104	9e-23	B3 domain-containing protein Os01g0234100 OS=Oryza sativa subsp. japonica GN=Os01g0234100 PE=2 SV=1	--	--	--	--	--	--	--	--	--	--	-	-	-
CL6892.Contig6_All	1477	1.2578	1.4775	2.007	gi|359475380|ref|XP_002282068.2|	126.3	1e-27	PREDICTED: B3 domain-containing protein Os01g0234100-like [Vitis vinifera]	--	--	--	--	sp|Q0JP99|Y1341_ORYSJ	106	4e-23	B3 domain-containing protein Os01g0234100 OS=Oryza sativa subsp. japonica GN=Os01g0234100 PE=2 SV=1	--	--	--	--	--	--	--	--	--	--	-	-	-
CL6895.Contig2_All	1007	2.4598	1.4152	1.9179	gi|326496009|dbj|BAJ90626.1|	103.2	6e-21	predicted protein [Hordeum vulgare subsp. vulgare]	--	--	--	--	sp|Q07970|ATK1_ARATH	99.4	3e-21	Kinesin-1 OS=Arabidopsis thaliana GN=ATK1 PE=2 SV=1	SPAC664.10	73.2	7e-13	COG5059	Kinesin-like protein	K10405	1e-21	102	smo:SELMODRAFT_84710	kinesin family member C1	GO:0016570//histone modification;GO:0010094//specification of carpel identity;GO:0007059//chromosome segregation;GO:0009736//cytokinin mediated signaling pathway;GO:0006342//chromatin silencing;GO:0007127//meiosis I;GO:0009723//response to ethylene stimulus;GO:0051258//protein polymerization;GO:0043414//macromolecule methylation;GO:0051329//interphase of mitotic cell cycle;GO:0006260//DNA replica…	GO:0008569//minus-end-directed microtubule motor activity;GO:0005515//protein binding	GO:0009524//phragmoplast;GO:0005876//spindle microtubule;GO:0005634//nucleus
CL6914.Contig1_All	1365	34.1549	32.724	35.1417	gi|404435149|gb|AFR68941.1|	647.1	0	sucrose non-fermenting 1-related protein kinase 2 family member [Solanum tuberosum]	gi|225448214|ref|XM_002269185.1|	605	1e-170	PREDICTED: Vitis vinifera serine/threonine-protein kinase SRK2B-like, transcript variant 1 (LOC100259302), mRNA	sp|P43291|SRK2A_ARATH	608	3e-174	Serine/threonine-protein kinase SRK2A OS=Arabidopsis thaliana GN=SRK2A PE=1 SV=1	ECU03g0620	117	5e-26	COG0515	Serine/threonine protein kinase	K14498	0	637	rcu:RCOM_0321490	serine/threonine-protein kinase SRK2 [EC:2.7.11.1]	GO:0006468//protein phosphorylation	GO:0005524//ATP binding;GO:0004674//protein serine/threonine kinase activity	-
CL6977.Contig3_All	13957	5.0612	5.6063	6.2366	gi|218201724|gb|EEC84151.1|	140.6	6e-31	hypothetical protein OsI_30520 [Oryza sativa Indica Group]	gi|359488326|ref|XM_003633694.1|	1170	0	PREDICTED: Vitis vinifera auxin transport protein BIG-like (LOC100256705), mRNA	sp|Q9SRU2|BIG_ARATH	2836	0	Auxin transport protein BIG OS=Arabidopsis thaliana GN=BIG PE=2 SV=2	--	--	--	--	--	K10691	0	3084	gmx:100776325	E3 ubiquitin-protein ligase UBR4 [EC:6.3.2.19]	GO:0009620//response to fungus;GO:0009926//auxin polar transport;GO:0009640//photomorphogenesis;GO:0010311//lateral root formation;GO:0009733//response to auxin stimulus;GO:0016567//protein ubiquitination;GO:0048283//indeterminate inflorescence morphogenesis;GO:0009826//unidimensional cell growth	GO:0008270//zinc ion binding;GO:0004842//ubiquitin-protein ligase activity	GO:0005829//cytosol;GO:0009506//plasmodesma;GO:0016020//membrane
CL7024.Contig3_All	1667	13.7448	15.5484	17.8903	gi|225429826|ref|XP_002283043.1|	573.2	4e-162	PREDICTED: uncharacterized protein LOC100242392 [Vitis vinifera]	gi|225429825|ref|XM_002283007.1|	125	1e-25	PREDICTED: Vitis vinifera uncharacterized LOC100242392 (LOC100242392), mRNA	--	--	--	--	CC0255	126	1e-28	COG1680	Beta-lactamase class C and other penicillin binding proteins	K08869	4e-163	573	vvi:100242392	aarF domain-containing kinase	GO:0030968//endoplasmic reticulum unfolded protein response;GO:0044237//cellular metabolic process	GO:0016772//transferase activity, transferring phosphorus-containing groups	GO:0005794//Golgi apparatus;GO:0005783//endoplasmic reticulum;GO:0005886//plasma membrane
CL7155.Contig2_All	502	4.3175	3.5486	4.563	gi|224103735|ref|XP_002313173.1|	52	4e-06	predicted protein [Populus trichocarpa] >gi|222849581|gb|EEE87128.1| predicted protein [Populus trichocarpa]	gi|356575727|ref|XM_003555941.1|	93.7	2e-16	PREDICTED: Glycine max ATP-dependent Clp protease proteolytic subunit-related protein 1, chloroplastic-like (LOC100820008), mRNA	sp|Q9XJ35|CLPR1_ARATH	82.8	9e-17	ATP-dependent Clp protease proteolytic subunit-related protein 1, chloroplastic OS=Arabidopsis thaliana GN=CLPR1 PE=1 SV=1	--	--	--	--	--	--	--	--	--	--	GO:0006508//proteolysis	GO:0004252//serine-type endopeptidase activity	GO:0009941//chloroplast envelope;GO:0009534//chloroplast thylakoid;GO:0009840//chloroplastic endopeptidase Clp complex
CL7207.Contig1_All	963	3.0315	3.8384	2.7051	gi|297744238|emb|CBI37208.3|	199.1	7e-50	unnamed protein product [Vitis vinifera]	gi|224121103|ref|XM_002318461.1|	67.9	2e-08	Populus trichocarpa predicted protein, mRNA	--	--	--	--	--	--	--	--	--	--	--	--	--	--	-	-	-
CL7207.Contig2_All	1842	7.0119	8.2928	9.0219	gi|297744238|emb|CBI37208.3|	219.2	1e-55	unnamed protein product [Vitis vinifera]	gi|224121103|ref|XM_002318461.1|	67.9	3e-08	Populus trichocarpa predicted protein, mRNA	--	--	--	--	--	--	--	--	--	--	--	--	--	--	-	-	-
CL7331.Contig1_All	357	0.8673	0.7485	1.0065	gi|225459824|ref|XP_002285918.1|	86.3	1e-16	PREDICTED: uncharacterized protein LOC100248789 [Vitis vinifera] >gi|302141681|emb|CBI18884.3| unnamed protein product [Vitis vinifera]	gi|356517543|ref|XM_003527399.1|	69.9	2e-09	PREDICTED: Glycine max uncharacterized protein LOC100814378 (LOC100814378), mRNA	--	--	--	--	--	--	--	--	--	--	--	--	--	--	GO:0006661//phosphatidylinositol biosynthetic process	-	GO:0005739//mitochondrion
CL7369.Contig4_All	1441	15.1331	11.8677	23.1584	gi|225452288|ref|XP_002271099.1|	175.6	1e-42	PREDICTED: uncharacterized protein LOC100262754 [Vitis vinifera]	gi|356559662|ref|XM_003548070.1|	95.6	1e-16	PREDICTED: Glycine max surfeit locus protein 2-like (LOC100806918), mRNA	--	--	--	--	--	--	--	--	--	--	--	--	--	--	-	-	GO:0005634//nucleus
CL7456.Contig1_All	588	30.7674	17.6472	14.895	--	--	--	--	--	--	--	--	--	--	--	--	--	--	--	--	--	--	--	--	--	--	-	-	-
CL7491.Contig1_All	578	40.1769	18.4149	17.7948	gi|3242079|emb|CAA07370.1|	94.4	1e-18	proline-rich protein [Capsicum annuum]	--	--	--	--	--	--	--	--	--	--	--	--	--	--	--	--	--	--	-	-	-
CL7491.Contig3_All	1137	40.3425	15.2757	19.8302	gi|388494848|gb|AFK35490.1|	169.1	1e-40	unknown [Medicago truncatula]	gi|126507692|gb|EF463011.1|	61.9	1e-06	Chlorokybus atmophyticus strain SAG 48.80 mitochondrion, complete genome	--	--	--	--	--	--	--	--	--	--	--	--	--	--	-	-	GO:0009506//plasmodesma;GO:0005634//nucleus
CL7491.Contig4_All	1158	56.838	23.8057	28.7017	gi|388494848|gb|AFK35490.1|	163.3	6e-39	unknown [Medicago truncatula]	gi|126507692|gb|EF463011.1|	61.9	1e-06	Chlorokybus atmophyticus strain SAG 48.80 mitochondrion, complete genome	--	--	--	--	--	--	--	--	--	--	--	--	--	--	-	-	GO:0009506//plasmodesma;GO:0005634//nucleus
CL7525.Contig2_All	2692	4.7979	5.0623	4.9553	gi|225454838|ref|XP_002274927.1|	368.6	2e-100	PREDICTED: uncharacterized protein LOC100254467 [Vitis vinifera]	gi|312283552|dbj|AK353556.1|	77.8	5e-11	Thellungiella halophila mRNA, complete cds, clone: RTFL01-52-J19	sp|P59278|Y1745_ARATH	137	4e-32	Uncharacterized protein At1g51745 OS=Arabidopsis thaliana GN=At1g51745 PE=2 SV=2	YDR170c	58.2	7e-08	COG5307	SEC7 domain proteins	K11294	2e-08	59.7	osa:4337032	nucleolin	-	-	-
CL7525.Contig3_All	2721	6.1936	6.0067	6.5366	gi|225454838|ref|XP_002274927.1|	370.2	9e-101	PREDICTED: uncharacterized protein LOC100254467 [Vitis vinifera]	gi|312283552|dbj|AK353556.1|	77.8	5e-11	Thellungiella halophila mRNA, complete cds, clone: RTFL01-52-J19	sp|P59278|Y1745_ARATH	135	2e-31	Uncharacterized protein At1g51745 OS=Arabidopsis thaliana GN=At1g51745 PE=2 SV=2	YDR170c	57.8	1e-07	COG5307	SEC7 domain proteins	K11294	2e-08	59.7	osa:4337032	nucleolin	-	-	-
CL7525.Contig5_All	1771	7.2181	9.7066	12.6298	gi|225454838|ref|XP_002274927.1|	184.1	5e-45	PREDICTED: uncharacterized protein LOC100254467 [Vitis vinifera]	gi|356569462|ref|XM_003552872.1|	69.9	8e-09	PREDICTED: Glycine max insulin-degrading enzyme-like (LOC100797049), mRNA	sp|P59278|Y1745_ARATH	49.3	7e-06	Uncharacterized protein At1g51745 OS=Arabidopsis thaliana GN=At1g51745 PE=2 SV=2	YDR170c	51.2	6e-06	COG5307	SEC7 domain proteins	K11323	3e-08	54.7	vcn:VOLCADRAFT_121342	histone arginine demethylase JMJD6 [EC:1.14.11.-]	-	-	-
CL7596.Contig2_All	597	999.128	2027.78	2112.33	gi|15221813|ref|NP_175843.1|	118.6	5e-26	dehydrin family protein [Arabidopsis thaliana] >gi|11762148|gb|AAG40352.1|AF325000_1 At1g54410 [Arabidopsis thaliana] >gi|17979507|gb|AAL50089.1| At1g54410/F20D21_23 [Arabidopsis thaliana] >gi|20453307|gb|AAM19892.1| At1g54410/F20D21_23 [Arabidopsis thaliana] >gi|332194979|gb|AEE33100.1| dehydrin family protein [Arabidopsis thaliana]	gi|116109613|gb|EF050426.1|	315	3e-83	Artemisia annua clone gel4-1	sp|Q9SB89|RH27_ARATH	47	8e-06	DEAD-box ATP-dependent RNA helicase 27 OS=Arabidopsis thaliana GN=RH27 PE=2 SV=2	--	--	--	--	--	K11131	8e-08	55.1	osa:4344029	H/ACA ribonucleoprotein complex subunit 4 [EC:5.4.99.-]	GO:0050896//response to stimulus	-	GO:0009507//chloroplast
CL7636.Contig1_All	512	2.7646	1.7396	2.8071	gi|225453575|ref|XP_002263012.1|	149.4	2e-35	PREDICTED: auxin-induced protein 10A5 [Vitis vinifera]	gi|332189094|gb|CP002684.1|	60	2e-06	Arabidopsis thaliana chromosome 1, complete sequence	sp|P33080|AX10A_SOYBN	66.2	9e-12	Auxin-induced protein X10A OS=Glycine max PE=2 SV=1	--	--	--	--	--	K14488	2e-36	149	vvi:100267831	SAUR family protein	GO:0009733//response to auxin stimulus;GO:0006816//calcium ion transport	-	GO:0005739//mitochondrion
CL7636.Contig2_All	467	2.1785	2.7655	2.0197	gi|225453575|ref|XP_002263012.1|	149.4	1e-35	PREDICTED: auxin-induced protein 10A5 [Vitis vinifera]	gi|332189094|gb|CP002684.1|	60	2e-06	Arabidopsis thaliana chromosome 1, complete sequence	sp|P33080|AX10A_SOYBN	66.2	8e-12	Auxin-induced protein X10A OS=Glycine max PE=2 SV=1	--	--	--	--	--	K14488	2e-36	149	vvi:100267831	SAUR family protein	GO:0009733//response to auxin stimulus;GO:0006816//calcium ion transport	-	GO:0005739//mitochondrion
CL7661.Contig1_All	1111	25.7992	28.5407	30.5627	gi|301073323|gb|ADK56449.1|	158.7	1e-37	acyl-CoA-binding protein [Vitis vinifera]	gi|255582128|ref|XM_002531813.1|	61.9	1e-06	Ricinus communis Cell division protein ftsH, putative, mRNA	sp|Q9STX1|ACBP3_ARATH	133	2e-31	Acyl-CoA-binding domain-containing protein 3 OS=Arabidopsis thaliana GN=ACBP3 PE=1 SV=1	--	--	--	--	--	K11323	2e-08	58.2	vcn:VOLCADRAFT_121342	histone arginine demethylase JMJD6 [EC:1.14.11.-]	GO:0006952//defense response;GO:0051707//response to other organism	-	-
CL7661.Contig2_All	252	1.2287	0.5302	1.0694	--	--	--	--	--	--	--	--	--	--	--	--	--	--	--	--	--	--	--	--	--	--	-	-	-
CL7841.Contig1_All	540	13.0241	16.082	15.4705	--	--	--	--	--	--	--	--	--	--	--	--	--	--	--	--	--	--	--	--	--	--	-	-	-
CL7849.Contig1_All	1280	35.3517	25.1551	21.5799	gi|319718137|gb|ADV59370.1|	487.3	2e-136	GAGA-binding transcriptional activator [Cichorium intybus]	gi|319718136|gb|FJ982287.1|	244	2e-61	Cichorium intybus GAGA-binding transcriptional activator (BBR/BPC2) mRNA, complete cds	sp|Q8L999|BPC6_ARATH	407	9e-114	Protein BASIC PENTACYSTEINE6 OS=Arabidopsis thaliana GN=BPC6 PE=1 SV=1	--	--	--	--	--	--	--	--	--	--	GO:0006355//regulation of transcription, DNA-dependent;GO:0009723//response to ethylene stimulus	GO:0003677//DNA binding;GO:0003700//sequence-specific DNA binding transcription factor activity;GO:0042803//protein homodimerization activity	GO:0005730//nucleolus
CL7864.Contig2_All	1114	6.3927	3.9977	3.5077	gi|15221174|ref|NP_175273.1|	57.8	3e-07	F-box/RNI-like/FBD-like domain-containing protein [Arabidopsis thaliana] >gi|5733869|gb|AAD49757.1|AC007932_5 Contains F-box domain PF|00646 [Arabidopsis thaliana] >gi|332194164|gb|AEE32285.1| F-box/RNI-like/FBD-like domain-containing protein [Arabidopsis thaliana]	gi|336238976|gb|HM543461.1|	69.9	5e-09	Helianthus annuus clone BAC 242G9 TIR_1 pseudogene, complete sequence; TIR_2 gene, complete cds; retrotransposon Ty1/Copia, large subunit ribosomal RNA gene, and retrotransposon Ty1/Copia, complete sequence; TIR_3 gene, complete cds; retrotransposon Ty3/Gypsy, complete sequence; and retrotransposon Ty3/Gypsy, partial sequence	sp|Q5W6B9|HAP2A_ORYSJ	48.1	9e-06	Protein HAPLESS 2-A OS=Oryza sativa subsp. japonica GN=HAP2A PE=2 SV=1	--	--	--	--	--	K01785	5e-06	50.4	ath:AT5G15140	aldose 1-epimerase [EC:5.1.3.3]	-	-	-
CL7864.Contig3_All	952	5.715	3.3214	3.3025	gi|15221174|ref|NP_175273.1|	57.8	2e-07	F-box/RNI-like/FBD-like domain-containing protein [Arabidopsis thaliana] >gi|5733869|gb|AAD49757.1|AC007932_5 Contains F-box domain PF|00646 [Arabidopsis thaliana] >gi|332194164|gb|AEE32285.1| F-box/RNI-like/FBD-like domain-containing protein [Arabidopsis thaliana]	gi|156255288|gb|AC159124.16|	67.9	2e-08	Medicago truncatula clone mth2-172h20, complete sequence	sp|Q5W6B9|HAP2A_ORYSJ	48.1	7e-06	Protein HAPLESS 2-A OS=Oryza sativa subsp. japonica GN=HAP2A PE=2 SV=1	--	--	--	--	--	K01785	4e-06	50.4	ath:AT5G15140	aldose 1-epimerase [EC:5.1.3.3]	-	-	-
CL7910.Contig2_All	2669	4.0106	3.2037	3.0459	gi|356501576|ref|XP_003519600.1|	492.7	1e-137	PREDICTED: uncharacterized protein LOC100807139 [Glycine max]	gi|258679596|gb|AC237870.1|	75.8	2e-10	Solanum tuberosum clone RH141P18, complete sequence	sp|Q5PNS0|Y3228_ARATH	143	6e-34	PHD finger protein At3g20280 OS=Arabidopsis thaliana GN=At3g20280 PE=2 SV=1	--	--	--	--	--	K02603	3e-06	52.8	gmx:100798547	origin recognition complex subunit 1	-	-	-
CL7911.Contig4_All	3748	3.5995	4.4558	5.5484	gi|296083403|emb|CBI23358.3|	1413.3	0	unnamed protein product [Vitis vinifera]	gi|359495893|ref|XR_139896.1|	280	1e-71	PREDICTED: Vitis vinifera type II inositol-1,4,5-trisphosphate 5-phosphatase FRA3-like (LOC100253200), miscRNA	sp|Q84W55|IP5P4_ARATH	1248	0	Type II inositol 1,4,5-trisphosphate 5-phosphatase FRA3 OS=Arabidopsis thaliana GN=FRA3 PE=1 SV=2	SPBC577.13_2	114	1e-24	COG5411	Phosphatidylinositol 5-phosphate phosphatase	K01099	2e-17	90.5	ota:Ot04g02290	phosphatidylinositol-bisphosphatase [EC:3.1.3.36]	GO:0048364//root development;GO:0009611//response to wounding;GO:0046855//inositol phosphate dephosphorylation;GO:0009827//plant-type cell wall modification;GO:0010252//auxin homeostasis;GO:0010182//sugar mediated signaling pathway;GO:0009637//response to blue light;GO:0009737//response to abscisic acid stimulus;GO:0010087//phloem or xylem histogenesis;GO:0007584//response to nutrient;GO:0009860/…	GO:0004445//inositol-polyphosphate 5-phosphatase activity;GO:0052658//inositol-1,4,5-trisphosphate 5-phosphatase activity	GO:0080008//Cul4-RING ubiquitin ligase complex;GO:0005634//nucleus
CL7926.Contig1_All	636	1.2519	0.7703	1.1299	--	--	--	--	gi|226500075|ref|NM_001157209.1|	61.9	7e-07	Zea mays LOC100284314 (pco114282), mRNA >gi|195641031|gb|EU967866.1| Zea mays clone 306726 zinc finger protein hangover mRNA, complete cds	--	--	--	--	--	--	--	--	--	--	--	--	--	--	-	-	-
CL7926.Contig2_All	596	1.1875	0.8219	0.6782	--	--	--	--	gi|226500075|ref|NM_001157209.1|	61.9	7e-07	Zea mays LOC100284314 (pco114282), mRNA >gi|195641031|gb|EU967866.1| Zea mays clone 306726 zinc finger protein hangover mRNA, complete cds	--	--	--	--	--	--	--	--	--	--	--	--	--	--	-	-	-
CL7926.Contig5_All	296	0.7472	1.2036	0.4552	--	--	--	--	gi|226500075|ref|NM_001157209.1|	61.9	3e-07	Zea mays LOC100284314 (pco114282), mRNA >gi|195641031|gb|EU967866.1| Zea mays clone 306726 zinc finger protein hangover mRNA, complete cds	--	--	--	--	--	--	--	--	--	--	--	--	--	--	-	-	-
CL8150.Contig1_All	350	1.5166	1.1452	1.0266	gi|357511923|ref|XP_003626250.1|	67.4	6e-11	Cell cycle checkpoint control protein RAD9A [Medicago truncatula] >gi|355501265|gb|AES82468.1| Cell cycle checkpoint control protein RAD9A [Medicago truncatula]	--	--	--	--	--	--	--	--	--	--	--	--	--	K10994	1e-10	62.8	vvi:100264904	cell cycle checkpoint control protein RAD9A [EC:3.1.11.2]	-	-	GO:0005739//mitochondrion
CL8150.Contig2_All	442	7.6056	7.053	6.5034	gi|357511923|ref|XP_003626250.1|	84	6e-16	Cell cycle checkpoint control protein RAD9A [Medicago truncatula] >gi|355501265|gb|AES82468.1| Cell cycle checkpoint control protein RAD9A [Medicago truncatula]	--	--	--	--	--	--	--	--	--	--	--	--	--	K10994	3e-16	82	vvi:100264904	cell cycle checkpoint control protein RAD9A [EC:3.1.11.2]	-	-	-
CL8162.Contig1_All	1901	4.4675	4.334	4.0638	gi|225427278|ref|XP_002278878.1|	589.3	6e-167	PREDICTED: BUD13 homolog [Vitis vinifera] >gi|297742135|emb|CBI33922.3| unnamed protein product [Vitis vinifera]	gi|359474574|ref|XM_002278842.2|	151	3e-33	PREDICTED: Vitis vinifera BUD13 homolog-like (LOC100245538), mRNA	sp|Q7XTT4|NUCL2_ORYSJ	52.8	7e-07	Nucleolin 2 OS=Oryza sativa subsp. japonica GN=Os04g0620700 PE=2 SV=2	--	--	--	--	--	K13106	6e-168	589	vvi:100245538	pre-mRNA-splicing factor CWC26	-	-	GO:0005634//nucleus;GO:0005829//cytosol
CL8162.Contig2_All	1887	4.0787	4.4369	3.9511	gi|225427278|ref|XP_002278878.1|	589.3	6e-167	PREDICTED: BUD13 homolog [Vitis vinifera] >gi|297742135|emb|CBI33922.3| unnamed protein product [Vitis vinifera]	gi|359474574|ref|XM_002278842.2|	151	3e-33	PREDICTED: Vitis vinifera BUD13 homolog-like (LOC100245538), mRNA	sp|Q7XTT4|NUCL2_ORYSJ	52.4	9e-07	Nucleolin 2 OS=Oryza sativa subsp. japonica GN=Os04g0620700 PE=2 SV=2	--	--	--	--	--	K13106	6e-168	589	vvi:100245538	pre-mRNA-splicing factor CWC26	-	-	GO:0005634//nucleus;GO:0005829//cytosol
CL8162.Contig5_All	1902	4.1163	3.6761	3.2824	gi|225427278|ref|XP_002278878.1|	589.3	6e-167	PREDICTED: BUD13 homolog [Vitis vinifera] >gi|297742135|emb|CBI33922.3| unnamed protein product [Vitis vinifera]	gi|359474574|ref|XM_002278842.2|	151	3e-33	PREDICTED: Vitis vinifera BUD13 homolog-like (LOC100245538), mRNA	sp|Q7XTT4|NUCL2_ORYSJ	52.4	9e-07	Nucleolin 2 OS=Oryza sativa subsp. japonica GN=Os04g0620700 PE=2 SV=2	--	--	--	--	--	K13106	6e-168	589	vvi:100245538	pre-mRNA-splicing factor CWC26	-	-	GO:0005634//nucleus;GO:0005829//cytosol
CL8181.Contig2_All	6198	20.5892	19.8459	18.1672	gi|224056471|ref|XP_002298873.1|	2545.4	0	predicted protein [Populus trichocarpa] >gi|222846131|gb|EEE83678.1| predicted protein [Populus trichocarpa]	gi|359494311|ref|XM_002268860.2|	775	0	PREDICTED: Vitis vinifera E3 ubiquitin-protein ligase UPL1-like (LOC100246297), mRNA	sp|Q8GY23|UPL1_ARATH	2144	0	E3 ubiquitin-protein ligase UPL1 OS=Arabidopsis thaliana GN=UPL1 PE=1 SV=3	SPAC19D5.04	489	3e-137	COG5021	Ubiquitin-protein ligase	K10592	0	2440	gmx:100819012	E3 ubiquitin-protein ligase HUWE1 [EC:6.3.2.19]	GO:0042787//protein ubiquitination involved in ubiquitin-dependent protein catabolic process	GO:0004842//ubiquitin-protein ligase activity	GO:0009506//plasmodesma;GO:0016020//membrane;GO:0005634//nucleus;GO:0005829//cytosol;GO:0005739//mitochondrion;GO:0000151//ubiquitin ligase complex
CL8229.Contig2_All	793	19.0764	9.154	9.5153	gi|147765904|emb|CAN77892.1|	125.6	7e-28	hypothetical protein VITISV_016272 [Vitis vinifera]	gi|123706400|emb|AM466181.1|	60	3e-06	Vitis vinifera contig VV78X065033.6, whole genome shotgun sequence	--	--	--	--	--	--	--	--	--	--	--	--	--	--	-	-	-
CL8232.Contig3_All	376	2.3528	2.3689	2.9863	--	--	--	--	--	--	--	--	--	--	--	--	--	--	--	--	--	--	--	--	--	--	-	-	-
CL8242.Contig1_All	1099	8.9754	7.2536	5.599	gi|225455722|ref|XP_002267313.1|	330.5	2e-89	PREDICTED: uncharacterized protein LOC100252678 [Vitis vinifera]	gi|359490902|ref|XM_002267277.2|	115	9e-23	PREDICTED: Vitis vinifera uncharacterized LOC100252678 (LOC100252678), mRNA	--	--	--	--	--	--	--	--	--	--	--	--	--	--	-	-	-
CL8268.Contig2_All	259	3.928	1.2036	3.8151	--	--	--	--	--	--	--	--	--	--	--	--	--	--	--	--	--	--	--	--	--	--	-	-	-
CL8295.Contig2_All	2214	5.1745	5.4109	5.9237	gi|356557709|ref|XP_003547155.1|	221.1	5e-56	PREDICTED: zinc finger CCCH domain-containing protein 27-like [Glycine max]	--	--	--	--	sp|Q84VG7|C3H27_ARATH	155	7e-38	Zinc finger CCCH domain-containing protein 27 OS=Arabidopsis thaliana GN=FES1 PE=2 SV=2	--	--	--	--	--	--	--	--	--	--	-	-	-
CL8295.Contig3_All	2485	4.8594	4.8567	4.7174	gi|356557709|ref|XP_003547155.1|	223.4	1e-56	PREDICTED: zinc finger CCCH domain-containing protein 27-like [Glycine max]	--	--	--	--	sp|Q84VG7|C3H27_ARATH	157	3e-38	Zinc finger CCCH domain-containing protein 27 OS=Arabidopsis thaliana GN=FES1 PE=2 SV=2	--	--	--	--	--	--	--	--	--	--	-	-	-
CL83.Contig1_All	2121	3.2116	2.0157	2.6258	gi|323500677|gb|ADX86902.1|	236.9	2e-157	NBS-LRR protein [Helianthus annuus]	gi|323500674|gb|HQ222360.1|	65.9	2e-07	Helianthus annuus cultivar HA383 clone BAC P339N08, complete sequence	sp|Q7XBQ9|RGA2_SOLBU	236	4e-94	Disease resistance protein RGA2 OS=Solanum bulbocastanum GN=RGA2 PE=1 SV=1	alr0124_1	52.4	3e-06	COG4886	Leucine-rich repeat (LRR) protein	K03013	3e-88	208	vvi:100258335	DNA-directed RNA polymerases I, II, and III subunit RPABC1	-	-	-
CL83.Contig2_All	1448	4.7349	3.5985	4.0634	gi|262752381|gb|ACY69609.1|	385.6	1e-105	CC-NBS-LRR resistance-like protein RGC203 [Helianthus annuus]	--	--	--	--	sp|Q7XBQ9|RGA2_SOLBU	273	1e-73	Disease resistance protein RGA2 OS=Solanum bulbocastanum GN=RGA2 PE=1 SV=1	--	--	--	--	--	K03013	6e-69	259	vvi:100258335	DNA-directed RNA polymerases I, II, and III subunit RPABC1	-	-	-
CL8325.Contig1_All	785	8.2831	8.5665	5.2638	gi|296086351|emb|CBI31940.3|	172.6	5e-42	unnamed protein product [Vitis vinifera]	gi|195608851|gb|EU954138.1|	83.8	2e-13	Zea mays clone 1456632 negatively light-regulated protein mRNA, complete cds	--	--	--	--	--	--	--	--	--	--	--	--	--	--	-	-	-
CL8325.Contig2_All	763	9.1016	8.2299	5.9454	gi|296086351|emb|CBI31940.3|	172.6	5e-42	unnamed protein product [Vitis vinifera]	gi|195608851|gb|EU954138.1|	83.8	2e-13	Zea mays clone 1456632 negatively light-regulated protein mRNA, complete cds	--	--	--	--	--	--	--	--	--	--	--	--	--	--	-	-	-
CL842.Contig1_All	3400	8.4953	7.1386	6.6843	gi|374095607|gb|AEY85031.1|	1630.9	0	putative pre-mRNA splicing factor [Camellia sinensis]	gi|147774592|emb|AM452165.2|	682	0	Vitis vinifera contig VV78X185891.8, whole genome shotgun sequence	sp|Q9FNS4|MBB1_CHLRE	77.4	5e-14	PsbB mRNA maturation factor Mbb1, chloroplastic OS=Chlamydomonas reinhardtii GN=MBB1 PE=2 SV=1	YBR055c	339	2e-92	COG0457	FOG: TPR repeat	K12855	0	1610	vvi:100251732	pre-mRNA-processing factor 6	GO:0009409//response to cold;GO:0000398//mRNA splicing, via spliceosome;GO:0006508//proteolysis;GO:0019252//starch biosynthetic process	GO:0004181//metallocarboxypeptidase activity;GO:0008270//zinc ion binding	GO:0009568;GO:0005634//nucleus
CL8458.Contig1_All	750	11.7954	12.5291	12.5161	gi|297829614|ref|XP_002882689.1|	301.6	7e-81	hypothetical protein ARALYDRAFT_317863 [Arabidopsis lyrata subsp. lyrata] >gi|297328529|gb|EFH58948.1| hypothetical protein ARALYDRAFT_317863 [Arabidopsis lyrata subsp. lyrata]	gi|356576387|ref|XM_003556266.1|	145	7e-32	PREDICTED: Glycine max nudix hydrolase 26, chloroplastic-like (LOC100814519), mRNA	sp|Q9CAF2|NUD26_ARATH	294	4e-80	Nudix hydrolase 26, chloroplastic OS=Arabidopsis thaliana GN=NUDT26 PE=1 SV=1	RC0320	127	2e-29	COG0494	NTP pyrophosphohydrolases including oxidative damage repair enzymes	K08311	9e-10	62	ota:Ot10g03540	putative (di)nucleoside polyphosphate hydrolase [EC:3.6.1.-]	GO:0019243//methylglyoxal catabolic process to D-lactate	GO:0046872//metal ion binding;GO:0034432//bis(5'-adenosyl)-pentaphosphatase activity;GO:0005524//ATP binding;GO:0004081//bis(5'-nucleosyl)-tetraphosphatase (asymmetrical) activity	GO:0009507//chloroplast
CL8458.Contig2_All	958	16.3449	16.131	13.0805	gi|297829614|ref|XP_002882689.1|	301.6	1e-80	hypothetical protein ARALYDRAFT_317863 [Arabidopsis lyrata subsp. lyrata] >gi|297328529|gb|EFH58948.1| hypothetical protein ARALYDRAFT_317863 [Arabidopsis lyrata subsp. lyrata]	gi|356576387|ref|XM_003556266.1|	145	9e-32	PREDICTED: Glycine max nudix hydrolase 26, chloroplastic-like (LOC100814519), mRNA	sp|Q9CAF2|NUD26_ARATH	294	6e-80	Nudix hydrolase 26, chloroplastic OS=Arabidopsis thaliana GN=NUDT26 PE=1 SV=1	RC0320	127	3e-29	COG0494	NTP pyrophosphohydrolases including oxidative damage repair enzymes	K08311	4e-09	60.5	ota:Ot10g03540	putative (di)nucleoside polyphosphate hydrolase [EC:3.6.1.-]	GO:0019243//methylglyoxal catabolic process to D-lactate	GO:0046872//metal ion binding;GO:0034432//bis(5'-adenosyl)-pentaphosphatase activity;GO:0005524//ATP binding;GO:0004081//bis(5'-nucleosyl)-tetraphosphatase (asymmetrical) activity	GO:0009507//chloroplast
CL8481.Contig1_All	297	0.7447	0.1499	1.2098	--	--	--	--	--	--	--	--	--	--	--	--	--	--	--	--	--	--	--	--	--	--	-	-	-
CL8481.Contig2_All	1331	4.3203	2.9779	2.9358	gi|296084007|emb|CBI24395.3|	362.5	8e-99	unnamed protein product [Vitis vinifera]	gi|359479081|ref|XM_002272610.2|	109	7e-21	PREDICTED: Vitis vinifera uncharacterized LOC100259916 (LOC100259916), mRNA	sp|O65639|CSP1_ARATH	87.4	2e-17	Cold shock protein 1 OS=Arabidopsis thaliana GN=CSP1 PE=2 SV=1	SPAC13D6.02c	91.7	3e-18	COG5082	Arginine methyltransferase-interacting protein, contains RING Zn-finger	K09250	6e-18	90.5	ppp:PHYPADRAFT_27641	cellular nucleic acid-binding protein	-	-	-
CL8485.Contig1_All	300	0.5898	0	0.4491	--	--	--	--	--	--	--	--	--	--	--	--	--	--	--	--	--	--	--	--	--	--	-	-	-
CL8485.Contig2_All	427	1.6574	1.6687	0.9467	--	--	--	--	--	--	--	--	--	--	--	--	--	--	--	--	--	--	--	--	--	--	-	-	-
CL8495.Contig1_All	454	2.5332	4.3161	6.6283	gi|302143429|emb|CBI21990.3|	133.3	1e-30	unnamed protein product [Vitis vinifera]	gi|160952136|emb|CU223985.1|	73.8	1e-10	Populus EST from leave	--	--	--	--	--	--	--	--	--	--	--	--	--	--	GO:0009684//indoleacetic acid biosynthetic process;GO:0006569//tryptophan catabolic process	-	GO:0005634//nucleus
CL8495.Contig2_All	429	1.5466	3.2181	3.769	gi|359485444|ref|XP_002276750.2|	132.5	1e-30	PREDICTED: uncharacterized protein LOC100245463 [Vitis vinifera]	gi|160952136|emb|CU223985.1|	73.8	1e-10	Populus EST from leave	--	--	--	--	--	--	--	--	--	--	--	--	--	--	GO:0009684//indoleacetic acid biosynthetic process;GO:0006569//tryptophan catabolic process	-	GO:0005634//nucleus
CL8502.Contig1_All	273	2.5924	0	0.4936	--	--	--	--	--	--	--	--	--	--	--	--	--	--	--	--	--	--	--	--	--	--	-	-	-
CL8502.Contig2_All	205	0.8631	0.4345	0.6573	--	--	--	--	--	--	--	--	--	--	--	--	--	--	--	--	--	--	--	--	--	--	-	-	-
CL8743.Contig2_All	2058	5.2658	7.4008	5.3906	gi|255556996|ref|XP_002519531.1|	817	0	Auxin response factor, putative [Ricinus communis] >gi|223541394|gb|EEF42945.1| Auxin response factor, putative [Ricinus communis]	gi|337273024|gb|JF911788.1|	153	8e-34	Solanum lycopersicum cultivar MP1 auxin response factor 10 mRNA, complete cds	sp|Q653H7|ARFR_ORYSJ	718	0	Auxin response factor 18 OS=Oryza sativa subsp. japonica GN=ARF18 PE=2 SV=1	--	--	--	--	--	K14486	4e-73	274	pop:POPTR_589324	auxin response factor	GO:0044249//cellular biosynthetic process;GO:0044238//primary metabolic process;GO:0009725//response to hormone stimulus;GO:1901360;GO:0048513//organ development;GO:0050794//regulation of cellular process;GO:0048608//reproductive structure development;GO:0006725//cellular aromatic compound metabolic process	-	-
CL8957.Contig2_All	1349	7.2464	6.7017	6.8587	gi|30682386|ref|NP_196460.2|	215.7	1e-54	SWIB/MDM2 and Plus-3 and GYF domain-containing protein [Arabidopsis thaliana] >gi|73622094|sp|Q9FT92.2|Y5843_ARATH RecName: Full=Uncharacterized protein At5g08430 >gi|192807344|gb|ACF06124.1| At5g08430 [Arabidopsis thaliana] >gi|332003917|gb|AED91300.1| SWIB/MDM2 and Plus-3 and GYF domain-containing protein [Arabidopsis thaliana]	--	--	--	--	sp|Q9FT92|Y5843_ARATH	215	4e-56	Uncharacterized protein At5g08430 OS=Arabidopsis thaliana GN=At5g08430 PE=1 SV=2	--	--	--	--	--	--	--	--	--	--	GO:0044238//primary metabolic process;GO:0010264//myo-inositol hexakisphosphate biosynthetic process;GO:0044260	GO:0005488//binding	-
CL9068.Contig1_All	470	1.7881	2.2741	2.1979	--	--	--	--	gi|323500674|gb|HQ222360.1|	61.9	5e-07	Helianthus annuus cultivar HA383 clone BAC P339N08, complete sequence	--	--	--	--	--	--	--	--	--	--	--	--	--	--	-	-	-
CL9141.Contig1_All	1613	22.4318	23.9377	24.4481	gi|359479205|ref|XP_003632233.1|	536.2	5e-151	PREDICTED: uncharacterized protein LOC100258161 isoform 1 [Vitis vinifera] >gi|359479207|ref|XP_003632234.1| PREDICTED: uncharacterized protein LOC100258161 isoform 2 [Vitis vinifera] >gi|147853236|emb|CAN80681.1| hypothetical protein VITISV_037734 [Vitis vinifera]	gi|357509098|ref|XM_003624790.1|	107	3e-20	Medicago truncatula RNA-binding protein (MTR_7g088140) mRNA, complete cds	sp|Q6Z1C0|NUCL1_ORYSJ	78.6	1e-14	Nucleolin 1 OS=Oryza sativa subsp. japonica GN=Os08g0192900 PE=2 SV=1	SPAC140.02	124	6e-28	COG0724	RNA-binding proteins (RRM domain)	K12741	2e-28	125	rcu:RCOM_0655610	heterogeneous nuclear ribonucleoprotein A1/A3	-	GO:1901363;GO:0097159//organic cyclic compound binding	-
CL9141.Contig3_All	1628	65.6156	73.9965	90.5459	gi|359479205|ref|XP_003632233.1|	551.2	1e-155	PREDICTED: uncharacterized protein LOC100258161 isoform 1 [Vitis vinifera] >gi|359479207|ref|XP_003632234.1| PREDICTED: uncharacterized protein LOC100258161 isoform 2 [Vitis vinifera] >gi|147853236|emb|CAN80681.1| hypothetical protein VITISV_037734 [Vitis vinifera]	gi|357509098|ref|XM_003624790.1|	107	3e-20	Medicago truncatula RNA-binding protein (MTR_7g088140) mRNA, complete cds	sp|Q7XTT4|NUCL2_ORYSJ	79.3	6e-15	Nucleolin 2 OS=Oryza sativa subsp. japonica GN=Os04g0620700 PE=2 SV=2	SPAC140.02	117	6e-26	COG0724	RNA-binding proteins (RRM domain)	K12741	2e-27	122	bdi:100837968	heterogeneous nuclear ribonucleoprotein A1/A3	GO:0006952//defense response;GO:0009693//ethylene biosynthetic process;GO:0008219//cell death;GO:0010150//leaf senescence;GO:0009738//abscisic acid mediated signaling pathway	GO:0017091//AU-rich element binding;GO:0005515//protein binding	GO:0005829//cytosol;GO:0005634//nucleus
CL9141.Contig4_All	1715	26.8234	21.0858	20.6632	gi|359479205|ref|XP_003632233.1|	531.2	1e-149	PREDICTED: uncharacterized protein LOC100258161 isoform 1 [Vitis vinifera] >gi|359479207|ref|XP_003632234.1| PREDICTED: uncharacterized protein LOC100258161 isoform 2 [Vitis vinifera] >gi|147853236|emb|CAN80681.1| hypothetical protein VITISV_037734 [Vitis vinifera]	gi|357493686|ref|XM_003617084.1|	153	7e-34	Medicago truncatula Heterogeneous nuclear ribonucleoprotein D0 (MTR_5g088220) mRNA, complete cds	sp|Q9FVQ1|NUCL1_ARATH	101	2e-21	Nucleolin 1 OS=Arabidopsis thaliana GN=NUCL1 PE=1 SV=1	SPAC140.02	131	4e-30	COG0724	RNA-binding proteins (RRM domain)	K12741	2e-35	148	bdi:100837968	heterogeneous nuclear ribonucleoprotein A1/A3	GO:0006952//defense response;GO:0050789//regulation of biological process;GO:0009693//ethylene biosynthetic process;GO:0008219//cell death;GO:0010150//leaf senescence	GO:0017091//AU-rich element binding;GO:0005515//protein binding	GO:0005829//cytosol;GO:0005634//nucleus
CL9141.Contig5_All	1730	23.0113	20.5683	20.1465	gi|359479205|ref|XP_003632233.1|	527.7	2e-148	PREDICTED: uncharacterized protein LOC100258161 isoform 1 [Vitis vinifera] >gi|359479207|ref|XP_003632234.1| PREDICTED: uncharacterized protein LOC100258161 isoform 2 [Vitis vinifera] >gi|147853236|emb|CAN80681.1| hypothetical protein VITISV_037734 [Vitis vinifera]	gi|357493686|ref|XM_003617084.1|	145	2e-31	Medicago truncatula Heterogeneous nuclear ribonucleoprotein D0 (MTR_5g088220) mRNA, complete cds	sp|Q9FVQ1|NUCL1_ARATH	100	3e-21	Nucleolin 1 OS=Arabidopsis thaliana GN=NUCL1 PE=1 SV=1	SPAC140.02	119	1e-26	COG0724	RNA-binding proteins (RRM domain)	K12741	6e-34	144	bdi:100837968	heterogeneous nuclear ribonucleoprotein A1/A3	-	GO:1901363;GO:0097159//organic cyclic compound binding	-
CL9141.Contig6_All	1266	17.6093	14.2821	13.5169	gi|296083996|emb|CBI24384.3|	425.6	7e-118	unnamed protein product [Vitis vinifera]	gi|357493686|ref|XM_003617084.1|	145	1e-31	Medicago truncatula Heterogeneous nuclear ribonucleoprotein D0 (MTR_5g088220) mRNA, complete cds	sp|Q9FVQ1|NUCL1_ARATH	94	2e-19	Nucleolin 1 OS=Arabidopsis thaliana GN=NUCL1 PE=1 SV=1	SPAC140.02	125	2e-28	COG0724	RNA-binding proteins (RRM domain)	K11294	2e-29	128	zma:100273020	nucleolin	GO:0006952//defense response;GO:0009693//ethylene biosynthetic process;GO:0008219//cell death;GO:0010150//leaf senescence;GO:0009738//abscisic acid mediated signaling pathway	GO:0017091//AU-rich element binding;GO:0005515//protein binding	GO:0005829//cytosol;GO:0005634//nucleus
CL9141.Contig7_All	1179	20.0342	19	18.2095	gi|296083996|emb|CBI24384.3|	425.2	8e-118	unnamed protein product [Vitis vinifera]	gi|357493686|ref|XM_003617084.1|	145	1e-31	Medicago truncatula Heterogeneous nuclear ribonucleoprotein D0 (MTR_5g088220) mRNA, complete cds	sp|Q9FVQ1|NUCL1_ARATH	92.8	3e-19	Nucleolin 1 OS=Arabidopsis thaliana GN=NUCL1 PE=1 SV=1	SPAC140.02	114	4e-25	COG0724	RNA-binding proteins (RRM domain)	K11294	1e-27	122	zma:100273020	nucleolin	GO:0010150//leaf senescence;GO:0009693//ethylene biosynthetic process;GO:0006952//defense response;GO:0008219//cell death	GO:0003723//RNA binding	GO:0005634//nucleus
CL9219.Contig1_All	881	76.4158	51.0557	57.3537	gi|28629828|gb|AAO45182.1|	555.4	3e-157	peroxidase 1 [Artemisia annua]	gi|28629827|gb|AY208699.1|	1431	0	Artemisia annua peroxidase 1 (POD1) mRNA, complete cds	sp|Q9SZE7|PER51_ARATH	406	7e-114	Peroxidase 51 OS=Arabidopsis thaliana GN=PER51 PE=2 SV=1	--	--	--	--	--	K00430	1e-124	443	rcu:RCOM_0578390	peroxidase [EC:1.11.1.7]	GO:0009651//response to salt stress;GO:0055114//oxidation-reduction process;GO:0006979//response to oxidative stress	GO:0020037//heme binding;GO:0046872//metal ion binding;GO:0004601//peroxidase activity;GO:0005515//protein binding	GO:0005576//extracellular region;GO:0005737//cytoplasm
CL9286.Contig1_All	617	3.1544	2.2376	2.9118	gi|356508857|ref|XP_003523170.1|	84.7	9e-16	PREDICTED: uncharacterized protein LOC100795139 [Glycine max]	gi|328751894|gb|AC244290.3|	77.8	1e-11	Solanum lycopersicum strain Heinz 1706 chromosome 10 clone hba-21m16 map 10, complete sequence	--	--	--	--	AGl732	50.8	2e-06	COG0523	Putative GTPases (G3E family)	K03189	2e-07	53.9	vvi:100243473	urease accessory protein	-	-	GO:0044444//cytoplasmic part;GO:0005886//plasma membrane;GO:0043231//intracellular membrane-bounded organelle
CL9286.Contig2_All	502	11.7191	6.5649	6.9787	gi|356508857|ref|XP_003523170.1|	84.7	5e-16	PREDICTED: uncharacterized protein LOC100795139 [Glycine max]	gi|328751894|gb|AC244290.3|	77.8	9e-12	Solanum lycopersicum strain Heinz 1706 chromosome 10 clone hba-21m16 map 10, complete sequence	sp|Q6DBM8|MTPB_ARATH	46.6	7e-06	Metal tolerance protein B OS=Arabidopsis thaliana GN=MTPB PE=2 SV=1	AGl732	50.8	1e-06	COG0523	Putative GTPases (G3E family)	K03189	1e-07	53.9	vvi:100243473	urease accessory protein	-	-	GO:0044444//cytoplasmic part;GO:0005886//plasma membrane;GO:0043231//intracellular membrane-bounded organelle
CL934.Contig2_All	2453	9.3947	7.5344	5.4564	gi|255552712|ref|XP_002517399.1|	870.2	0	Peroxidase 31 precursor, putative [Ricinus communis] >gi|223543410|gb|EEF44941.1| Peroxidase 31 precursor, putative [Ricinus communis]	gi|356547241|ref|XR_137113.1|	99.6	1e-17	PREDICTED: Glycine max nucleolar complex protein 2 homolog (LOC100786692), miscRNA	sp|Q9ZPV5|NOC2L_ARATH	814	0	Nucleolar complex protein 2 homolog OS=Arabidopsis thaliana GN=At2g18220 PE=2 SV=2	YOR206w	217	9e-56	COG5604	Uncharacterized conserved protein	K14833	0	870	rcu:RCOM_0852470	nucleolar complex protein 2	GO:0042991//transcription factor import into nucleus;GO:0009220//pyrimidine ribonucleotide biosynthetic process	GO:0005488//binding;GO:0016491//oxidoreductase activity	GO:0005829//cytosol;GO:0005634//nucleus
CL9340.Contig1_All	8274	21.9507	35.1315	36.598	--	--	--	--	--	--	--	--	--	--	--	--	--	--	--	--	--	--	--	--	--	--	-	-	-
CL936.Contig1_All	875	9.0488	8.0417	7.3403	gi|359487840|ref|XP_003633661.1|	359	4e-98	PREDICTED: protein MAK16 homolog B-like [Vitis vinifera]	gi|356517457|ref|XM_003527356.1|	165	9e-38	PREDICTED: Glycine max protein mak16-like (LOC100792740), mRNA	--	--	--	--	SPAC222.06	251	9e-67	COG5129	Nuclear protein with HMG-like acidic region	K14831	5e-99	358	vvi:100854778	protein MAK16	GO:0009220//pyrimidine ribonucleotide biosynthetic process;GO:0001510//RNA methylation	-	GO:0005634//nucleus
CL936.Contig2_All	1218	6.2463	6.4718	5.9738	gi|359487840|ref|XP_003633661.1|	337.4	2e-91	PREDICTED: protein MAK16 homolog B-like [Vitis vinifera]	gi|356517457|ref|XM_003527356.1|	105	1e-19	PREDICTED: Glycine max protein mak16-like (LOC100792740), mRNA	--	--	--	--	SPAC222.06	243	6e-64	COG5129	Nuclear protein with HMG-like acidic region	K14831	2e-92	337	vvi:100854778	protein MAK16	GO:0009220//pyrimidine ribonucleotide biosynthetic process;GO:0001510//RNA methylation	-	GO:0005634//nucleus
CL936.Contig4_All	721	10.6134	9.8829	7.7245	gi|15220695|ref|NP_173742.1|	280.4	1e-74	MAK16 protein-like protein [Arabidopsis thaliana] >gi|332192246|gb|AEE30367.1| MAK16 protein-like protein [Arabidopsis thaliana]	gi|356517457|ref|XM_003527356.1|	115	6e-23	PREDICTED: Glycine max protein mak16-like (LOC100792740), mRNA	--	--	--	--	SPAC222.06	190	2e-48	COG5129	Nuclear protein with HMG-like acidic region	K14831	2e-75	280	ath:AT1G23280	protein MAK16	GO:0009220//pyrimidine ribonucleotide biosynthetic process;GO:0001510//RNA methylation	-	GO:0005634//nucleus
CL9384.Contig2_All	653	12.5992	14.663	15.5446	gi|147786914|emb|CAN68896.1|	63.2	3e-09	hypothetical protein VITISV_026040 [Vitis vinifera]	gi|357499628|ref|XM_003620055.1|	73.8	2e-10	Medicago truncatula Disease resistance-like protein GS3-4 (MTR_6g076090) mRNA, complete cds	sp|Q8H0U8|RH42_ARATH	65.5	2e-11	DEAD-box ATP-dependent RNA helicase 42 OS=Arabidopsis thaliana GN=RH42 PE=1 SV=2	SPAC27D7.14c	61.2	1e-09	COG0457	FOG: TPR repeat	K11323	2e-13	73.6	vcn:VOLCADRAFT_121342	histone arginine demethylase JMJD6 [EC:1.14.11.-]	-	GO:0005488//binding	-
CL9568.Contig1_All	2757	7.5887	6.6713	7.836	gi|183239018|gb|ACC60967.1|	1120.5	0	phytochrome C [Vitis vinifera]	gi|39598893|gb|AY396713.1|	131	4e-27	Platanus occidentalis phytochrome C (PHYC) gene, partial cds	sp|Q10CQ8|PHYC_ORYSJ	1012	0	Phytochrome C OS=Oryza sativa subsp. japonica GN=PHYC PE=2 SV=1	alr3157	125	5e-28	COG4251	Bacteriophytochrome (light-regulated signal transduction histidine kinase)	K12121	0	892	smo:SELMODRAFT_161430	phytochrome B	GO:0009585//red, far-red light phototransduction;GO:0000160//two-component signal transduction system (phosphorelay);GO:0017006//protein-tetrapyrrole linkage;GO:0018106//peptidyl-histidine phosphorylation;GO:0006355//regulation of transcription, DNA-dependent;GO:0018298//protein-chromophore linkage;GO:0009584//detection of visible light;GO:0023014//signal transduction by phosphorylation	GO:0005524//ATP binding;GO:0008020//G-protein coupled photoreceptor activity;GO:0042803//protein homodimerization activity;GO:0000155//two-component sensor activity	GO:0016020//membrane
CL9568.Contig2_All	3973	8.9401	8.5527	9.2022	gi|183239018|gb|ACC60967.1|	1595.9	0	phytochrome C [Vitis vinifera]	gi|39753874|gb|AY425121.1|	210	8e-51	Neoscortechinia kingii PHYC (PHYC) gene, partial cds	sp|Q10CQ8|PHYC_ORYSJ	1453	0	Phytochrome C OS=Oryza sativa subsp. japonica GN=PHYC PE=2 SV=1	alr3157	257	1e-67	COG4251	Bacteriophytochrome (light-regulated signal transduction histidine kinase)	K12121	0	1324	smo:SELMODRAFT_161430	phytochrome B	GO:0009585//red, far-red light phototransduction;GO:0000160//two-component signal transduction system (phosphorelay);GO:0017006//protein-tetrapyrrole linkage;GO:0018106//peptidyl-histidine phosphorylation;GO:0006355//regulation of transcription, DNA-dependent;GO:0018298//protein-chromophore linkage;GO:0009584//detection of visible light;GO:0023014//signal transduction by phosphorylation	GO:0005524//ATP binding;GO:0008020//G-protein coupled photoreceptor activity;GO:0042803//protein homodimerization activity;GO:0000155//two-component sensor activity	GO:0016020//membrane
CL9568.Contig3_All	2717	7.3097	6.5073	6.7446	gi|183239018|gb|ACC60967.1|	1120.5	0	phytochrome C [Vitis vinifera]	gi|39598893|gb|AY396713.1|	131	4e-27	Platanus occidentalis phytochrome C (PHYC) gene, partial cds	sp|Q10CQ8|PHYC_ORYSJ	1012	0	Phytochrome C OS=Oryza sativa subsp. japonica GN=PHYC PE=2 SV=1	alr3157	125	5e-28	COG4251	Bacteriophytochrome (light-regulated signal transduction histidine kinase)	K12121	0	892	smo:SELMODRAFT_161430	phytochrome B	GO:0009585//red, far-red light phototransduction;GO:0000160//two-component signal transduction system (phosphorelay);GO:0017006//protein-tetrapyrrole linkage;GO:0018106//peptidyl-histidine phosphorylation;GO:0006355//regulation of transcription, DNA-dependent;GO:0018298//protein-chromophore linkage;GO:0009584//detection of visible light;GO:0023014//signal transduction by phosphorylation	GO:0005524//ATP binding;GO:0008020//G-protein coupled photoreceptor activity;GO:0042803//protein homodimerization activity;GO:0000155//two-component sensor activity	GO:0016020//membrane
CL9583.Contig1_All	259	0.1708	0.6878	1.3873	gi|224089350|ref|XP_002308700.1|	28.1	5e-08	predicted protein [Populus trichocarpa] >gi|222854676|gb|EEE92223.1| predicted protein [Populus trichocarpa]	--	--	--	--	sp|Q0E3C8|CLPB3_ORYSJ	46.2	1e-08	Chaperone protein ClpB3, mitochondrial OS=Oryza sativa subsp. japonica GN=CLPB3 PE=2 SV=3	Cgl2721	41.6	9e-07	COG0542	ATPases with chaperone activity, ATP-binding subunit	K03695	9e-08	45.4	sbi:SORBI_01g032210	ATP-dependent Clp protease ATP-binding subunit ClpB	GO:0006457//protein folding;GO:0009408//response to heat;GO:0009644//response to high light intensity;GO:0042542//response to hydrogen peroxide	GO:0005524//ATP binding;GO:0016887//ATPase activity	GO:0005739//mitochondrion;GO:0009941//chloroplast envelope;GO:0009570//chloroplast stroma
CL9607.Contig4_All	1636	4.9748	5.0905	5.4633	gi|255579645|ref|XP_002530663.1|	350.9	3e-95	retinoblastoma-binding protein, putative [Ricinus communis] >gi|223529796|gb|EEF31732.1| retinoblastoma-binding protein, putative [Ricinus communis]	gi|359496487|ref|XM_003635199.1|	67.9	3e-08	PREDICTED: Vitis vinifera uncharacterized LOC100854867 (LOC100854867), mRNA	sp|Q8L716|U2A2B_ARATH	52.4	8e-07	Splicing factor U2af large subunit B OS=Arabidopsis thaliana GN=U2AF65B PE=2 SV=2	PA2976	50.4	9e-06	COG1530	Ribonucleases G and E	K15541	3e-36	151	mtr:MTR_5g098230	protein MPE1	GO:0009987//cellular process	-	-
CL9607.Contig5_All	2210	5.2239	4.796	5.7108	gi|255579645|ref|XP_002530663.1|	350.9	4e-95	retinoblastoma-binding protein, putative [Ricinus communis] >gi|223529796|gb|EEF31732.1| retinoblastoma-binding protein, putative [Ricinus communis]	gi|359496487|ref|XM_003635199.1|	67.9	4e-08	PREDICTED: Vitis vinifera uncharacterized LOC100854867 (LOC100854867), mRNA	sp|Q657S5|PHO11_ORYSJ	53.1	6e-07	Phosphate transporter PHO1-1 OS=Oryza sativa subsp. japonica GN=PHO1-1 PE=2 SV=2	--	--	--	--	--	K15541	4e-36	151	mtr:MTR_5g098230	protein MPE1	GO:0009987//cellular process	-	-
CL965.Contig1_All	813	6.0392	6.6282	6.6847	gi|336238977|gb|AEI27415.1|	237.7	1e-61	TIR_2 [Helianthus annuus]	gi|148285685|gb|EF559388.1|	127	2e-26	Helianthus tuberosus NBS-LRR resistance-like protein RGC109 gene, partial cds	sp|Q40392|TMVRN_NICGU	187	5e-48	TMV resistance protein N OS=Nicotiana glutinosa GN=N PE=1 SV=1	--	--	--	--	--	K13457	5e-09	59.7	vvi:100252764	disease resistance protein RPM1	-	GO:0000166//nucleotide binding	-
CL965.Contig4_All	1635	4.1122	3.541	4.3129	gi|336238977|gb|AEI27415.1|	161.4	3e-94	TIR_2 [Helianthus annuus]	gi|37196600|gb|AY153832.1|	198	1e-47	Lactuca sativa LSRGCAA02_RVK resistance protein candidate gene, partial cds	sp|Q40392|TMVRN_NICGU	166	1e-81	TMV resistance protein N OS=Nicotiana glutinosa GN=N PE=1 SV=1	--	--	--	--	--	K13457	3e-16	85.1	vvi:100252764	disease resistance protein RPM1	-	-	-
CL965.Contig5_All	236	0	0.5661	1.5225	gi|7381247|gb|AAF61452.1|AF139523_1	102.4	1e-21	disease-resistance protein NRSA1 [Tagetes erecta]	--	--	--	--	sp|Q40392|TMVRN_NICGU	70.1	3e-13	TMV resistance protein N OS=Nicotiana glutinosa GN=N PE=1 SV=1	--	--	--	--	--	--	--	--	--	--	GO:0050896//response to stimulus	-	-
CL9686.Contig2_All	3520	15.7077	14.3599	14.8651	gi|225432963|ref|XP_002284428.1|	1268.8	0	PREDICTED: MATH domain-containing protein At5g43560-like [Vitis vinifera]	gi|225432962|ref|XM_002284392.1|	521	1e-144	PREDICTED: Vitis vinifera MATH domain-containing protein At5g43560-like (LOC100247786), mRNA	sp|Q8RY18|Y5436_ARATH	877	0	MATH domain-containing protein At5g43560 OS=Arabidopsis thaliana GN=At5g43560 PE=1 SV=1	SPBC713.02c	54.7	1e-06	COG5077	Ubiquitin carboxyl-terminal hydrolase	K11838	2e-26	120	ppp:PHYPADRAFT_180457	ubiquitin carboxyl-terminal hydrolase 7 [EC:3.1.2.15]	GO:0009987//cellular process	GO:0043424//protein histidine kinase binding	GO:0044464//cell part
CL9764.Contig2_All	1498	4.0158	3.8351	2.9383	gi|356523749|ref|XP_003530497.1|	782.7	0	PREDICTED: uncharacterized protein LOC100817409 [Glycine max]	gi|14718994|gb|AF367245.1|AF367245	428	1e-117	Gossypium arboreum ceramide glucosyltransferase mRNA, complete cds	--	--	--	--	--	--	--	--	--	--	--	--	--	--	-	GO:0008120//ceramide glucosyltransferase activity	GO:0005794//Golgi apparatus
CL9764.Contig4_All	1371	4.3878	5.0024	3.2105	gi|356523749|ref|XP_003530497.1|	711.8	0	PREDICTED: uncharacterized protein LOC100817409 [Glycine max]	gi|14718994|gb|AF367245.1|AF367245	428	1e-117	Gossypium arboreum ceramide glucosyltransferase mRNA, complete cds	--	--	--	--	--	--	--	--	--	--	--	--	--	--	-	GO:0008120//ceramide glucosyltransferase activity	GO:0005794//Golgi apparatus
CL9888.Contig2_All	1073	6.9668	9.8366	9.7531	--	--	--	--	--	--	--	--	--	--	--	--	--	--	--	--	--	--	--	--	--	--	-	-	-
CL9937.Contig5_All	1201	1.8047	0.89	1.3463	gi|359473450|ref|XP_002264209.2|	91.7	2e-45	PREDICTED: uncharacterized protein LOC100267261 [Vitis vinifera]	gi|359473449|ref|XM_002264173.2|	65.9	9e-08	PREDICTED: Vitis vinifera uncharacterized LOC100267261 (LOC100267261), mRNA	--	--	--	--	STM2525	47.4	2e-09	COG0820	Predicted Fe-S-cluster redox enzyme	K06941	2e-41	107	sbi:SORBI_03g029230	23S rRNA (adenine2503-C2)-methyltransferase [EC:2.1.1.192]	GO:0001510//RNA methylation;GO:0006364//rRNA processing	GO:0008757//S-adenosylmethionine-dependent methyltransferase activity;GO:0051536//iron-sulfur cluster binding;GO:0005506//iron ion binding;GO:0008173//RNA methyltransferase activity	GO:0005739//mitochondrion
CL9991.Contig2_All	2634	8.7492	10.1277	9.2079	gi|224106113|ref|XP_002314048.1|	1270.4	0	predicted protein [Populus trichocarpa] >gi|222850456|gb|EEE88003.1| predicted protein [Populus trichocarpa]	gi|225450035|ref|XM_002273048.1|	543	1e-151	PREDICTED: Vitis vinifera alpha-N-acetylglucosaminidase-like (LOC100261888), mRNA	--	--	--	--	--	--	--	--	--	K01205	0	1270	pop:POPTR_1087870	alpha-N-acetylglucosaminidase [EC:3.2.1.50]	-	GO:0004561//alpha-N-acetylglucosaminidase activity	GO:0005773//vacuole;GO:0009507//chloroplast
Unigene1_All	1005	1.0563	1.3737	2.1899	--	--	--	--	--	--	--	--	--	--	--	--	--	--	--	--	--	--	--	--	--	--	-	-	-
Unigene10412_All	504	0.7899	1.0603	3.0299	gi|297738478|emb|CBI27679.3|	155.2	3e-37	unnamed protein product [Vitis vinifera]	gi|148539192|dbj|AK247958.1|	91.7	6e-16	Solanum lycopersicum cDNA, clone: LEFL2002AD08, HTC in fruit	sp|Q0J0K1|SPL18_ORYSJ	125	2e-29	Squamosa promoter-binding-like protein 18 OS=Oryza sativa subsp. japonica GN=SPL18 PE=2 SV=1	--	--	--	--	--	--	--	--	--	--	-	GO:0003677//DNA binding	GO:0005634//nucleus
Unigene10707_All	560	0.158	2.7039	4.4112	gi|357933567|dbj|BAL15050.1|	84	1e-15	glutamate receptor 2.3 [Solanum lycopersicum]	gi|157385053|gb|AC210505.1|	61.9	6e-07	Populus trichocarpa clone POP021-M24, complete sequence	sp|Q9C5V5|GLR28_ARATH	66.6	9e-12	Glutamate receptor 2.8 OS=Arabidopsis thaliana GN=GLR2.8 PE=2 SV=2	--	--	--	--	--	K05387	2e-11	66.6	ath:AT2G29110	glutamate receptor, ionotropic, other eukaryote	GO:0050896//response to stimulus;GO:0030003//cellular cation homeostasis	GO:0015276//ligand-gated ion channel activity	-
Unigene1074_All	555	4.0646	3.2899	2.9134	gi|224083831|ref|XP_002307139.1|	114	1e-24	predicted protein [Populus trichocarpa] >gi|222856588|gb|EEE94135.1| predicted protein [Populus trichocarpa]	--	--	--	--	--	--	--	--	--	--	--	--	--	--	--	--	--	--	-	-	-
Unigene11249_All	789	0.6167	2.2578	1.4231	gi|157092190|gb|ABV21945.1|	288.9	5e-77	type 1 diaclyglycerol acyltransferase [Vernonia galamensis]	gi|161334748|gb|EU232721.1|	426	1e-116	Helianthus annuus cultivar CAS-6 diacylglycerol acyltransferase (DAGAT1B) mRNA, complete cds	sp|Q9SLD2|DGAT1_ARATH	204	4e-53	Diacylglycerol O-acyltransferase 1 OS=Arabidopsis thaliana GN=DGAT1 PE=1 SV=2	--	--	--	--	--	K11155	5e-59	225	gmx:548005	diacylglycerol O-acyltransferase 1 [EC:2.3.1.20 2.3.1.75 2.3.1.76]	-	GO:0008374//O-acyltransferase activity	GO:0016021//integral to membrane
Unigene11598_All	524	3.6298	2.9746	3	gi|225445067|ref|XP_002280299.1|	70.5	1e-11	PREDICTED: arginyl-tRNA synthetase-like [Vitis vinifera]	--	--	--	--	--	--	--	--	--	--	--	--	--	K01887	1e-12	70.5	vvi:100261143	arginyl-tRNA synthetase [EC:6.1.1.19]	GO:0044249//cellular biosynthetic process;GO:0006139//nucleobase-containing compound metabolic process;GO:0044281//small molecule metabolic process;GO:0009793//embryo development ending in seed dormancy	-	GO:0009507//chloroplast
Unigene11630_All	2794	26.4542	20.243	22.2321	gi|225432592|ref|XP_002281388.1|	1017.7	0	PREDICTED: ARM REPEAT PROTEIN INTERACTING WITH ABF2 isoform 1 [Vitis vinifera] >gi|297737016|emb|CBI26217.3| unnamed protein product [Vitis vinifera]	gi|225437007|ref|XM_002272505.1|	394	1e-106	PREDICTED: Vitis vinifera ARM REPEAT PROTEIN INTERACTING WITH ABF2-like (LOC100251186), mRNA	sp|B9DHT4|ARIA_ARATH	992	0	ARM REPEAT PROTEIN INTERACTING WITH ABF2 OS=Arabidopsis thaliana GN=ARIA PE=1 SV=2	SPCC962.03c	74.3	1e-12	COG5064	Karyopherin (importin) alpha	K08332	2e-35	149	vcn:VOLCADRAFT_41528	vacuolar protein 8	GO:0009651//response to salt stress;GO:0010187//negative regulation of seed germination;GO:0000956//nuclear-transcribed mRNA catabolic process;GO:0009737//response to abscisic acid stimulus;GO:0042127//regulation of cell proliferation	GO:0005515//protein binding	GO:0031261//DNA replication preinitiation complex;GO:0005737//cytoplasm;GO:0005886//plasma membrane
Unigene11631_All	752	1.3529	38.198	4.7781	gi|259479222|dbj|BAI40146.1|	228.8	5e-59	glutathione S-transferase 1 [Diospyros kaki]	--	--	--	--	sp|Q9FUS8|GSTUH_ARATH	182	1e-46	Glutathione S-transferase U17 OS=Arabidopsis thaliana GN=GSTU17 PE=2 SV=1	NMB1953	64.3	2e-10	COG0625	Glutathione S-transferase	K00799	8e-52	201	rcu:RCOM_0699100	glutathione S-transferase [EC:2.5.1.18]	GO:0050896//response to stimulus	GO:0003824//catalytic activity	-
Unigene11736_All	630	21.6951	31.457	43.3458	gi|113205155|gb|ABI34274.1|	126.7	2e-28	IS10 transposase, putative [Solanum lycopersicum]	--	--	--	--	--	--	--	--	--	--	--	--	--	--	--	--	--	--	-	-	-
Unigene11810_All	825	2.3055	3.6168	3.2121	gi|297739087|emb|CBI28576.3|	266.5	3e-70	unnamed protein product [Vitis vinifera]	gi|359719088|gb|AC246212.6|	63.9	2e-07	Solanum lycopersicum strain Heinz 1706 chromosome 1 clone hba-58i3 map 1, complete sequence	sp|Q9CAL3|CRK2_ARATH	245	2e-65	Cysteine-rich receptor-like protein kinase 2 OS=Arabidopsis thaliana GN=CRK2 PE=2 SV=1	--	--	--	--	--	--	--	--	--	--	GO:0046777//protein autophosphorylation;GO:0010193//response to ozone;GO:0034976//response to endoplasmic reticulum stress;GO:0006457//protein folding;GO:0006857//oligopeptide transport;GO:0009408//response to heat;GO:0009644//response to high light intensity;GO:0042542//response to hydrogen peroxide	GO:0004674//protein serine/threonine kinase activity	GO:0009506//plasmodesma;GO:0005886//plasma membrane
Unigene12037_All	900	197.524	205.206	285.705	gi|295913708|gb|ADG58095.1|	172.9	5e-42	transcription factor [Lycoris longituba]	gi|349722861|emb|FQ393196.1|	129	5e-27	Vitis vinifera clone SS0AFA2YD08	sp|P40619|HMGL_IPONI	161	4e-40	HMG1/2-like protein OS=Ipomoea nil PE=2 SV=1	YMR072w	54.3	3e-07	COG5648	Chromatin-associated proteins containing the HMG domain	K10802	1e-40	164	vvi:100257544	high mobility group protein B1	-	-	GO:0005634//nucleus
Unigene12187_All	1702	23.7797	59.554	61.8561	gi|359473090|ref|XP_002275843.2|	706.4	0	PREDICTED: allantoate deiminase, chloroplastic-like [Vitis vinifera]	gi|359473089|ref|XM_002275807.2|	184	2e-43	PREDICTED: Vitis vinifera allantoate deiminase, chloroplastic-like (LOC100247417), mRNA	sp|O49434|AAH_ARATH	642	0	Allantoate deiminase, chloroplastic OS=Arabidopsis thaliana GN=AAH PE=1 SV=2	YPO3249	265	2e-70	COG0624	Acetylornithine deacetylase/Succinyl-diaminopimelate desuccinylase and related deacylases	K02083	0	706	vvi:100247417	allantoate deiminase [EC:3.5.3.9]	GO:0015996//chlorophyll catabolic process;GO:0010136//ureide catabolic process;GO:0006508//proteolysis	GO:0047652//allantoate deiminase activity;GO:0008237//metallopeptidase activity	GO:0016023//cytoplasmic membrane-bounded vesicle;GO:0009507//chloroplast;GO:0005783//endoplasmic reticulum
Unigene12437_All	354	8.3717	11.9514	11.1651	gi|351725191|ref|NP_001235804.1|	20.8	3e-12	uncharacterized protein LOC100306235 [Glycine max]	gi|403044555|ref|NM_001252740.2|	61.9	4e-07	Glycine max uncharacterized LOC100780553 (LOC100780553), mRNA	--	--	--	--	--	--	--	--	--	--	--	--	--	--	-	-	-
Unigene1246_All	2119	14.4659	8.0915	7.9061	gi|225460672|ref|XP_002266195.1|	496.1	8e-139	PREDICTED: trihelix transcription factor GT-2-like [Vitis vinifera]	gi|225460671|ref|XM_002266159.1|	111	3e-21	PREDICTED: Vitis vinifera trihelix transcription factor GT-2-like (LOC100241901), mRNA	sp|Q39117|TGT2_ARATH	391	7e-109	Trihelix transcription factor GT-2 OS=Arabidopsis thaliana GN=GT-2 PE=2 SV=1	YOR054c	55.1	5e-07	COG0452	Phosphopantothenoylcysteine synthetase/decarboxylase	K15559	2e-07	56.2	ota:Ot05g02000	regulator of Ty1 transposition protein 103	-	-	-
Unigene12512_All	288	0.7679	0.7732	0.7798	gi|51535590|dbj|BAD37534.1|	50.8	6e-06	hypothetical protein [Oryza sativa Japonica Group] >gi|51536355|dbj|BAD37486.1| hypothetical protein [Oryza sativa Japonica Group] >gi|222635953|gb|EEE66085.1| hypothetical protein OsJ_22105 [Oryza sativa Japonica Group]	--	--	--	--	--	--	--	--	mll5156	48.1	4e-06	COG0523	Putative GTPases (G3E family)	K09422	9e-06	46.6	aly:ARALYDRAFT_495585	myb proto-oncogene protein, plant	-	-	-
Unigene1269_All	234	13.9882	5.3289	8.6374	gi|356520065|ref|XP_003528686.1|	110.2	9e-24	PREDICTED: uncharacterized protein LOC100791504 [Glycine max]	gi|359483433|ref|XM_003632910.1|	83.8	7e-14	PREDICTED: Vitis vinifera uncharacterized LOC100854465 (LOC100854465), mRNA	--	--	--	--	--	--	--	--	--	--	--	--	--	--	-	-	GO:0005634//nucleus
Unigene1275_All	433	2.0431	1.7485	4.7715	gi|217073041|gb|ACJ84880.1|	169.1	1e-41	unknown [Medicago truncatula]	--	--	--	--	sp|P41095|RLA0_ORYSJ	166	6e-42	60S acidic ribosomal protein P0 OS=Oryza sativa subsp. japonica GN=Os08g0130500 PE=1 SV=3	SPCC18.14c	137	8e-33	COG0244	Ribosomal protein L10	K02941	2e-42	168	mtr:MTR_3g108280	large subunit ribosomal protein LP0	GO:0006414//translational elongation	GO:0003735//structural constituent of ribosome;GO:0016829//lyase activity	GO:0005840//ribosome
Unigene12916_All	619	31.2274	55.6863	66.4644	gi|225463572|ref|XP_002270172.1|	152.1	4e-36	PREDICTED: F-box/LRR-repeat protein 14 [Vitis vinifera] >gi|297743556|emb|CBI36423.3| unnamed protein product [Vitis vinifera]	--	--	--	--	--	--	--	--	--	--	--	--	--	--	--	--	--	--	-	-	GO:0005886//plasma membrane
Unigene12918_All	598	3.4765	2.3831	2.779	gi|350539299|ref|NP_001233874.1|	258.1	5e-68	protein DCL, chloroplastic [Solanum lycopersicum] >gi|6014934|sp|Q42463.1|DCL_SOLLC RecName: Full=Protein DCL, chloroplastic; AltName: Full=Defective chloroplasts and leaves protein; Flags: Precursor >gi|1305531|gb|AAC49433.1| defective chloroplasts and leaves; required for chloroplast development and palisade cell differentiation in leaves [Solanum lycopersicum] >gi|1323698|gb|AAC49434.1| DCL [S…	gi|350539298|ref|NM_001246945.1|	220	1e-54	Solanum lycopersicum defective chloroplasts and leaves; required for chloroplast development and palisade cell differentiation in leaves (DCL), mRNA >gi|1305530|gb|U55219.1|SLU55219 Solanum lycopersicum defective chloroplasts and leaves (DCL) mRNA, complete cds	sp|Q42463|DCL_SOLLC	258	2e-69	Protein DCL, chloroplastic OS=Solanum lycopersicum GN=DCL PE=2 SV=1	--	--	--	--	--	K03018	1e-06	51.2	zma:100501057	DNA-directed RNA polymerase III subunit RPC1 [EC:2.7.7.6]	GO:0009308//amine metabolic process	GO:0005507//copper ion binding;GO:0048038//quinone binding	GO:0009507//chloroplast
Unigene12975_All	1189	3.7946	2.7717	3.1353	gi|225451487|ref|XP_002274360.1|	221.1	2e-56	PREDICTED: squamosa promoter-binding-like protein 18 [Vitis vinifera] >gi|147822219|emb|CAN66012.1| hypothetical protein VITISV_024281 [Vitis vinifera] >gi|296082325|emb|CBI21330.3| unnamed protein product [Vitis vinifera]	gi|356571558|ref|XM_003553896.1|	89.7	6e-15	PREDICTED: Glycine max squamosa promoter-binding-like protein 16-like (LOC100798317), mRNA	sp|P0DI11|SP13B_ARATH	169	2e-42	Squamosa promoter-binding-like protein 13B OS=Arabidopsis thaliana GN=SPL13B PE=3 SV=1	--	--	--	--	--	--	--	--	--	--	-	-	-
Unigene12997_All	629	19.5496	12.6736	15.4237	gi|359472800|ref|XP_002274720.2|	214.2	1e-54	PREDICTED: dnaJ homolog subfamily C member 2-like [Vitis vinifera]	gi|359472799|ref|XM_002274684.2|	153	2e-34	PREDICTED: Vitis vinifera dnaJ homolog subfamily C member 2-like (LOC100259545), mRNA	--	--	--	--	SPBC1778.01c	55.5	7e-08	COG5269	Ribosome-associated chaperone zuotin	K09522	1e-54	210	vvi:100259545	DnaJ homolog subfamily C member 2	GO:0006457//protein folding	GO:0005515//protein binding	GO:0005634//nucleus
Unigene13056_All	1046	22.8776	14.0501	14.2128	gi|255540659|ref|XP_002511394.1|	290.8	2e-77	50S ribosomal protein L7/L12, putative [Ricinus communis] >gi|223550509|gb|EEF51996.1| 50S ribosomal protein L7/L12, putative [Ricinus communis]	gi|359491513|ref|XM_002282576.2|	117	2e-23	PREDICTED: Vitis vinifera 50S ribosomal protein L12, chloroplastic-like (LOC100246777), mRNA	sp|O22386|RK12_ORYSJ	92.4	4e-19	50S ribosomal protein L12, chloroplastic OS=Oryza sativa subsp. japonica GN=RPL12-2 PE=2 SV=2	sll1746	80.5	4e-15	COG0222	Ribosomal protein L7/L12	K02935	1e-17	89	ppp:PHYPADRAFT_27419	large subunit ribosomal protein L7/L12	GO:0006354//DNA-dependent transcription, elongation;GO:0006412//translation	GO:0003735//structural constituent of ribosome	GO:0015934//large ribosomal subunit;GO:0005739//mitochondrion
Unigene13207_All	1271	19.1061	20.0073	21.132	gi|118481618|gb|ABK92751.1|	387.1	2e-106	unknown [Populus trichocarpa]	gi|160953602|emb|CU224457.1|	105	1e-19	Populus EST from leave	--	--	--	--	--	--	--	--	--	K03144	2e-14	78.6	vvi:100258601	transcription initiation factor TFIIH subunit 4	GO:0046786//viral replication complex formation and maintenance	GO:0005515//protein binding	GO:0005773//vacuole;GO:0005794//Golgi apparatus;GO:0009506//plasmodesma;GO:0016023//cytoplasmic membrane-bounded vesicle;GO:0016021//integral to membrane;GO:0005576//extracellular region
Unigene13254_All	709	6.4883	4.5854	3.8009	gi|357510841|ref|XP_003625709.1|	77	2e-13	hypothetical protein MTR_7g102410 [Medicago truncatula] >gi|355500724|gb|AES81927.1| hypothetical protein MTR_7g102410 [Medicago truncatula]	--	--	--	--	--	--	--	--	--	--	--	--	--	--	--	--	--	--	-	-	-
Unigene13270_All	751	25.5031	29.3538	32.355	gi|225445996|ref|XP_002267083.1|	172.2	6e-42	PREDICTED: UPF0414 transmembrane protein C20orf30 homolog [Vitis vinifera] >gi|147825386|emb|CAN75495.1| hypothetical protein VITISV_030526 [Vitis vinifera] >gi|297735425|emb|CBI17865.3| unnamed protein product [Vitis vinifera]	gi|332656411|gb|CP002687.1|	69.9	3e-09	Arabidopsis thaliana chromosome 4, complete sequence	--	--	--	--	--	--	--	--	--	--	--	--	--	--	GO:0006661//phosphatidylinositol biosynthetic process	-	-
Unigene13273_All	935	66.5621	83.9729	65.8583	gi|296084542|emb|CBI25563.3|	187.6	2e-46	unnamed protein product [Vitis vinifera]	gi|166053358|emb|CU353997.1|	81.8	1e-12	Aphanomyces euteiches cDNA	sp|Q7Y180|AN322_ORYSJ	68.2	7e-12	Acidic leucine-rich nuclear phosphoprotein 32-related protein 2 OS=Oryza sativa subsp. japonica GN=Os03g0668900 PE=2 SV=1	YOR054c	102	7e-22	COG0452	Phosphopantothenoylcysteine synthetase/decarboxylase	K11323	2e-20	98.2	vcn:VOLCADRAFT_121342	histone arginine demethylase JMJD6 [EC:1.14.11.-]	GO:0006333//chromatin assembly or disassembly	-	GO:0009941//chloroplast envelope
Unigene13428_All	883	109.054	139.202	130.775	gi|224117268|ref|XP_002331738.1|	182.2	8e-45	predicted protein [Populus trichocarpa] >gi|118487434|gb|ABK95545.1| unknown [Populus trichocarpa] >gi|222874264|gb|EEF11395.1| predicted protein [Populus trichocarpa]	--	--	--	--	--	--	--	--	--	--	--	--	--	--	--	--	--	--	GO:0016558//protein import into peroxisome matrix;GO:0006635//fatty acid beta-oxidation	-	GO:0016023//cytoplasmic membrane-bounded vesicle;GO:0009507//chloroplast
Unigene13503_All	201	2.6408	1.9941	4.4691	--	--	--	--	--	--	--	--	--	--	--	--	--	--	--	--	--	K10865	2e-06	48.5	vvi:100252167	double-strand break repair protein MRE11	-	-	-
Unigene13757_All	228	1.164	1.172	0.985	--	--	--	--	--	--	--	--	--	--	--	--	--	--	--	--	--	--	--	--	--	--	-	-	-
Unigene13775_All	267	1.1597	1.8348	3.3644	--	--	--	--	--	--	--	--	--	--	--	--	--	--	--	--	--	--	--	--	--	--	-	-	-
Unigene13844_All	345	1.0257	1.2909	1.6924	--	--	--	--	--	--	--	--	--	--	--	--	--	--	--	--	--	--	--	--	--	--	-	-	-
Unigene14_All	1679	1.3172	1.7241	1.8993	--	--	--	--	--	--	--	--	--	--	--	--	--	--	--	--	--	--	--	--	--	--	-	-	-
Unigene14019_All	258	7.5436	5.1785	2.6113	gi|356531317|ref|XP_003534224.1|	104.4	4e-22	PREDICTED: uncharacterized protein LOC100810166 [Glycine max]	gi|225317768|dbj|AK323125.1|	77.8	5e-12	Solanum lycopersicum cDNA, clone: LEFL1049DB12, HTC in leaf	--	--	--	--	--	--	--	--	--	K07088	4e-19	90.9	pop:POPTR_853491		GO:0009926//auxin polar transport;GO:0006863//purine nucleobase transport;GO:0055085//transmembrane transport;GO:0019344//cysteine biosynthetic process;GO:0015824//proline transport	GO:0009672//auxin:hydrogen symporter activity	GO:0016021//integral to membrane
Unigene14046_All	389	1.7056	2.0607	1.0391	--	--	--	--	--	--	--	--	--	--	--	--	--	--	--	--	--	--	--	--	--	--	-	-	-
Unigene14119_All	280	1.4218	1.7496	3.0478	--	--	--	--	gi|392513444|emb|FO082270.1|	73.8	8e-11	Bathycoccus prasinos genomic : Chromosome_9	--	--	--	--	--	--	--	--	--	--	--	--	--	--	-	-	-
Unigene14243_All	249	1.0659	1.4308	2.7057	--	--	--	--	--	--	--	--	--	--	--	--	--	--	--	--	--	--	--	--	--	--	-	-	-
Unigene14372_All	328	2.6971	2.3082	3.1495	gi|164598190|gb|ABY61382.1|	137.1	6e-32	NBS-LRR resistance-like protein SFRGA16 [Helianthus annuus]	--	--	--	--	sp|Q39214|RPM1_ARATH	73.9	2e-14	Disease resistance protein RPM1 OS=Arabidopsis thaliana GN=RPM1 PE=1 SV=1	--	--	--	--	--	K03013	1e-14	76.3	vvi:100258335	DNA-directed RNA polymerases I, II, and III subunit RPABC1	-	-	-
Unigene14493_All	1764	13.641	12.5475	12.4762	gi|226377504|gb|ACO52508.1|	476.1	7e-133	transcription factor APETALA2 [Vitis vinifera]	gi|350535468|ref|NM_001247523.1|	470	1e-129	Solanum lycopersicum APETALA2-like protein (LOC100191138), mRNA >gi|188531132|gb|EU677382.1| Solanum lycopersicum APETALA2-like protein mRNA, complete cds	sp|P47927|AP2_ARATH	422	2e-118	Floral homeotic protein APETALA 2 OS=Arabidopsis thaliana GN=AP2 PE=1 SV=1	--	--	--	--	--	K09284	2e-134	477	vvi:100268051	AP2-like factor, euAP2 lineage	-	-	-
Unigene14770_All	2327	10.9679	9.7605	10.056	gi|297734460|emb|CBI15707.3|	886.3	0	unnamed protein product [Vitis vinifera]	gi|356527800|ref|XM_003532447.1|	240	5e-60	PREDICTED: Glycine max uncharacterized protein LOC100816702 (LOC100816702), mRNA	--	--	--	--	--	--	--	--	--	--	--	--	--	--	-	GO:0005524//ATP binding	GO:0016020//membrane;GO:0005634//nucleus
Unigene14793_All	2018	3.9454	3.862	4.1398	gi|225431806|ref|XP_002272864.1|	1015.4	0	PREDICTED: phospholipase D p1-like [Vitis vinifera]	gi|225431805|ref|XM_002272828.1|	381	1e-102	PREDICTED: Vitis vinifera phospholipase D p1-like (LOC100261987), mRNA	sp|Q9LRZ5|PLDP1_ARATH	997	0	Phospholipase D p1 OS=Arabidopsis thaliana GN=PLDP1 PE=2 SV=1	SPAC2F7.16c	201	3e-51	COG1502	Phosphatidylserine/phosphatidylglycerophosphate/cardiolipin synthases and related enzymes	K01115	0	1015	vvi:100261987	phospholipase D [EC:3.1.4.4]	GO:0031348//negative regulation of defense response;GO:0016036//cellular response to phosphate starvation;GO:0019375//galactolipid biosynthetic process;GO:0006995//cellular response to nitrogen starvation;GO:0009867//jasmonic acid mediated signaling pathway;GO:0009862//systemic acquired resistance, salicylic acid mediated signaling pathway;GO:0010363//regulation of plant-type hypersensitive respo…	GO:0004630//phospholipase D activity;GO:0032440//2-alkenal reductase [NAD(P)] activity;GO:0005543//phospholipid binding;GO:0070290//NAPE-specific phospholipase D activity	GO:0005773//vacuole
Unigene14894_All	1113	22.3747	16.0053	14.5275	gi|15239643|ref|NP_197410.1|	60.1	6e-08	heavy metal transport/detoxification domain-containing protein [Arabidopsis thaliana] >gi|332005267|gb|AED92650.1| heavy metal transport/detoxification domain-containing protein [Arabidopsis thaliana]	gi|210145633|dbj|AK244324.1|	71.9	1e-09	Glycine max cDNA, clone: GMFL01-02-L07	sp|Q9T0K5|LRX3_ARATH	105	6e-23	Leucine-rich repeat extensin-like protein 3 OS=Arabidopsis thaliana GN=LRX3 PE=1 SV=1	XF0818	80.9	4e-15	COG2730	Endoglucanase	K01115	3e-17	87.8	vcn:VOLCADRAFT_99471	phospholipase D [EC:3.1.4.4]	-	-	GO:0009506//plasmodesma;GO:0044464//cell part
Unigene14895_All	1092	33.4176	15.946	15.2182	gi|224085451|ref|XP_002307579.1|	153.7	4e-36	predicted protein [Populus trichocarpa] >gi|222857028|gb|EEE94575.1| predicted protein [Populus trichocarpa]	gi|392513444|emb|FO082270.1|	69.9	5e-09	Bathycoccus prasinos genomic : Chromosome_9	sp|Q9SFG6|FAF4_ARATH	115	3e-26	Protein FANTASTIC FOUR 4 OS=Arabidopsis thaliana GN=FAF4 PE=2 SV=1	RSp0626	51.6	2e-06	COG1429	Cobalamin biosynthesis protein CobN and related Mg-chelatases	K14692	6e-09	60.1	smo:SELMODRAFT_453384	solute carrier family 30 (zinc transporter), member 5	-	-	-
Unigene14907_All	1616	5.6933	4.933	4.5303	gi|359486314|ref|XP_002275667.2|	483.4	4e-135	PREDICTED: nitrilase homolog 1-like [Vitis vinifera] >gi|297736451|emb|CBI25322.3| unnamed protein product [Vitis vinifera]	gi|359486313|ref|XM_002275631.2|	240	4e-60	PREDICTED: Vitis vinifera nitrilase homolog 1-like (LOC100251802), mRNA	sp|Q9XGI9|AGUB_SOLLC	88.2	1e-17	N-carbamoylputrescine amidase OS=Solanum lycopersicum GN=CPA PE=2 SV=1	PA4475	219	1e-56	COG0388	Predicted amidohydrolase	K01506	4e-76	283	olu:OSTLU_39332	[EC:3.5.-.-]	GO:0046686//response to cadmium ion;GO:0009750//response to fructose stimulus;GO:0006807//nitrogen compound metabolic process;GO:0009744//response to sucrose stimulus;GO:0009749//response to glucose stimulus	GO:0000257//nitrilase activity	GO:0009536//plastid
Unigene15049_All	674	2.297	2.1805	3.9317	gi|359497477|ref|XP_002264150.2|	251.1	9e-66	PREDICTED: protein ODORANT1 [Vitis vinifera] >gi|296090686|emb|CBI41085.3| unnamed protein product [Vitis vinifera]	gi|151303114|gb|EF651783.1|	115	6e-23	Gossypium hirsutum transcription factor TF1 (TF1) mRNA, complete cds	sp|Q50EX6|ODO1_PETHY	213	6e-56	Protein ODORANT1 OS=Petunia hybrida GN=ODO1 PE=2 SV=1	ECU11g1690	71.2	1e-12	COG5147	Myb superfamily proteins, including transcription factors and mRNA splicing factors	K09422	9e-67	251	vvi:100259031	myb proto-oncogene protein, plant	-	-	-
Unigene15065_All	848	3.3905	2.8885	2.5423	gi|225434026|ref|XP_002272728.1|	169.5	5e-41	PREDICTED: uncharacterized protein LOC100247589 [Vitis vinifera]	--	--	--	--	--	--	--	--	--	--	--	--	--	--	--	--	--	--	-	-	-
Unigene15103_All	1060	105.241	60.3319	64.4901	gi|356562999|ref|XP_003549754.1|	230.7	2e-59	PREDICTED: uncharacterized protein LOC100809777 [Glycine max]	gi|145351313|ref|NM_119386.3|	60	5e-06	Arabidopsis thaliana tetratricopeptide repeat domain-containing protein-like protein (AT4G32340) mRNA, complete cds	--	--	--	--	--	--	--	--	--	K14692	2e-06	51.6	smo:SELMODRAFT_453384	solute carrier family 30 (zinc transporter), member 5	-	-	-
Unigene1519_All	417	2.864	1.4952	2.1542	--	--	--	--	--	--	--	--	--	--	--	--	--	--	--	--	--	--	--	--	--	--	-	-	-
Unigene15413_All	978	3.3469	2.0947	1.24	gi|359488171|ref|XP_002280570.2|	243.8	2e-63	PREDICTED: uncharacterized protein LOC100263470 [Vitis vinifera] >gi|296087265|emb|CBI33639.3| unnamed protein product [Vitis vinifera]	--	--	--	--	--	--	--	--	--	--	--	--	--	--	--	--	--	--	-	-	GO:0009506//plasmodesma
Unigene15654_All	1079	39.8874	49.6114	46.9123	gi|356575504|ref|XP_003555880.1|	421	1e-116	PREDICTED: vesicle-associated membrane protein 727-like [Glycine max]	gi|225464165|ref|XM_002269098.1|	232	6e-58	PREDICTED: Vitis vinifera vesicle-associated membrane protein 727-like, transcript variant 1 (LOC100243052), mRNA	sp|Q9M376|VA727_ARATH	405	3e-113	Vesicle-associated membrane protein 727 OS=Arabidopsis thaliana GN=VAMP727 PE=2 SV=1	YAL030w	70.5	5e-12	COG5143	Synaptobrevin/VAMP-like protein	K08511	4e-113	405	aly:ARALYDRAFT_906838	vesicle-associated membrane protein 72	GO:0006623//protein targeting to vacuole;GO:0016192//vesicle-mediated transport;GO:0007033//vacuole organization	-	GO:0005768//endosome;GO:0016023//cytoplasmic membrane-bounded vesicle;GO:0005886//plasma membrane;GO:0031201//SNARE complex;GO:0016021//integral to membrane;GO:0009507//chloroplast
Unigene15802_All	272	2.2767	1.801	2.9723	--	--	--	--	--	--	--	--	--	--	--	--	--	--	--	--	--	--	--	--	--	--	-	-	-
Unigene15935_All	1225	34.628	38.2089	36.0414	gi|225448249|ref|XP_002268725.1|	426.4	4e-118	PREDICTED: uncharacterized protein LOC100261160 [Vitis vinifera]	gi|350538712|ref|NM_001247171.1|	101	2e-18	Solanum lycopersicum tobamovirus multiplication 1 homolog 2 (TH2), mRNA >gi|74038610|dbj|AB193042.1| Solanum lycopersicum LeTH2 mRNA for tobamovirus multiplication 1 homolog 2, complete cds	--	--	--	--	--	--	--	--	--	--	--	--	--	--	GO:0046786//viral replication complex formation and maintenance	-	GO:0005774//vacuolar membrane;GO:0005886//plasma membrane
Unigene15997_All	1597	6.0657	5.2705	6.2998	gi|225435334|ref|XP_002282437.1|	41.2	3e-129	PREDICTED: auxin response factor 18-like [Vitis vinifera]	gi|225435333|ref|XM_002282401.1|	147	4e-32	PREDICTED: Vitis vinifera auxin response factor 18-like (LOC100256989), mRNA	sp|Q9AV47|ARFV_ORYSJ	371	5e-103	Auxin response factor 22 OS=Oryza sativa subsp. japonica GN=ARF22 PE=2 SV=1	--	--	--	--	--	K14486	2e-22	105	ppp:PHYPADRAFT_127229	auxin response factor	GO:0044249//cellular biosynthetic process;GO:0044238//primary metabolic process;GO:0009725//response to hormone stimulus;GO:1901360;GO:0048513//organ development;GO:0050794//regulation of cellular process;GO:0006725//cellular aromatic compound metabolic process	-	-
Unigene16093_All	2086	17.621	19.0436	20.7346	gi|225465569|ref|XP_002263468.1|	703.4	0	PREDICTED: uncharacterized protein LOC100263054 [Vitis vinifera] >gi|147791031|emb|CAN61465.1| hypothetical protein VITISV_005001 [Vitis vinifera]	gi|387965701|gb|JN606071.1|	79.8	1e-11	Beta vulgaris subsp. vulgaris cultivar US H20 genomic sequence	--	--	--	--	--	--	--	--	--	--	--	--	--	--	GO:0035556//intracellular signal transduction;GO:0009744//response to sucrose stimulus;GO:0009693//ethylene biosynthetic process;GO:0009750//response to fructose stimulus;GO:0009723//response to ethylene stimulus;GO:0009738//abscisic acid mediated signaling pathway	-	GO:0005634//nucleus
Unigene16109_All	261	1.5253	1.7063	1.5488	gi|51535590|dbj|BAD37534.1|	50.4	8e-06	hypothetical protein [Oryza sativa Japonica Group] >gi|51536355|dbj|BAD37486.1| hypothetical protein [Oryza sativa Japonica Group] >gi|222635953|gb|EEE66085.1| hypothetical protein OsJ_22105 [Oryza sativa Japonica Group]	--	--	--	--	--	--	--	--	--	--	--	--	--	--	--	--	--	--	-	-	-
Unigene16248_All	338	2.0939	1.9764	0.3986	gi|296084365|emb|CBI24753.3|	89.4	1e-17	unnamed protein product [Vitis vinifera]	gi|123706400|emb|AM466181.1|	65.9	2e-08	Vitis vinifera contig VV78X065033.6, whole genome shotgun sequence	--	--	--	--	--	--	--	--	--	K15202	4e-14	74.3	vvi:100247425	general transcription factor 3C polypeptide 5 (transcription factor C subunit 1)	-	-	-
Unigene16445_All	336	2.1063	1.458	2.4061	--	--	--	--	--	--	--	--	--	--	--	--	--	--	--	--	--	--	--	--	--	--	-	-	-
Unigene16471_All	273	1.7823	1.9576	1.1516	gi|224101757|ref|XP_002312409.1|	84.3	5e-16	predicted protein [Populus trichocarpa] >gi|222852229|gb|EEE89776.1| predicted protein [Populus trichocarpa]	gi|225316771|dbj|AK328735.1|	63.9	7e-08	Solanum lycopersicum cDNA, clone: LEFL3035H02, HTC in root	sp|Q39265|ZFP6_ARATH	81.6	9e-17	Zinc finger protein 6 OS=Arabidopsis thaliana GN=ZFP6 PE=2 SV=1	--	--	--	--	--	--	--	--	--	--	GO:0009987//cellular process;GO:0050896//response to stimulus;GO:0006811//ion transport	-	GO:0022626//cytosolic ribosome
Unigene16481_All	603	3.4477	2.8065	1.5642	gi|359490595|ref|XP_002274287.2|	236.9	1e-61	PREDICTED: uncharacterized protein At3g49140 [Vitis vinifera]	gi|241985750|dbj|AK333011.1|	65.9	4e-08	Triticum aestivum cDNA, clone: WT005_G22, cultivar: Chinese Spring	sp|Q0WMN5|Y3913_ARATH	200	6e-52	Uncharacterized protein At3g49140 OS=Arabidopsis thaliana GN=At3g49140 PE=1 SV=2	YOR054c	53.9	2e-07	COG0452	Phosphopantothenoylcysteine synthetase/decarboxylase	K11323	1e-09	60.8	vcn:VOLCADRAFT_121342	histone arginine demethylase JMJD6 [EC:1.14.11.-]	GO:0010027//thylakoid membrane organization;GO:0019288//isopentenyl diphosphate biosynthetic process, mevalonate-independent pathway	-	-
Unigene16765_All	628	23.4547	25.6713	30.1813	gi|297814634|ref|XP_002875200.1|	162.9	2e-39	hypothetical protein ARALYDRAFT_484241 [Arabidopsis lyrata subsp. lyrata] >gi|297321038|gb|EFH51459.1| hypothetical protein ARALYDRAFT_484241 [Arabidopsis lyrata subsp. lyrata]	gi|225316161|dbj|AK322115.1|	63.9	2e-07	Solanum lycopersicum cDNA, clone: LEFL1033BG10, HTC in leaf	sp|P14918|EXTN_MAIZE	51.6	3e-07	Extensin OS=Zea mays GN=HRGP PE=2 SV=1	--	--	--	--	--	--	--	--	--	--	-	-	-
Unigene16818_All	439	9.169	7.1012	3.1716	gi|217075743|gb|ACJ86231.1|	125.2	2e-28	unknown [Medicago truncatula]	gi|356564910|ref|XM_003550642.1|	95.6	3e-17	PREDICTED: Glycine max reticulon-like protein B21-like (LOC100799847), mRNA	sp|Q56X72|RTNLS_ARATH	110	3e-25	Reticulon-like protein B21 OS=Arabidopsis thaliana GN=RTNLB21 PE=2 SV=2	--	--	--	--	--	--	--	--	--	--	-	-	GO:0016023//cytoplasmic membrane-bounded vesicle;GO:0005783//endoplasmic reticulum;GO:0005634//nucleus
Unigene1703_All	244	1.4503	2.1902	4.4178	--	--	--	--	--	--	--	--	--	--	--	--	--	--	--	--	--	--	--	--	--	--	-	-	-
Unigene17134_All	214	3.7205	2.4973	2.5186	--	--	--	--	--	--	--	--	--	--	--	--	--	--	--	--	--	--	--	--	--	--	-	-	-
Unigene17378_All	276	0.3205	1.4522	1.4646	gi|255578310|ref|XP_002530022.1|	92.4	1e-18	conserved hypothetical protein [Ricinus communis] >gi|223530501|gb|EEF32384.1| conserved hypothetical protein [Ricinus communis]	--	--	--	--	--	--	--	--	--	--	--	--	--	--	--	--	--	--	-	-	GO:0005886//plasma membrane
Unigene17499_All	202	0.8759	0.6614	1.3341	gi|359493351|ref|XP_002277841.2|	76.6	1e-13	PREDICTED: uncharacterized protein LOC100251634 [Vitis vinifera]	--	--	--	--	sp|Q40392|TMVRN_NICGU	90.1	3e-19	TMV resistance protein N OS=Nicotiana glutinosa GN=N PE=1 SV=1	--	--	--	--	--	--	--	--	--	--	GO:0006952//defense response;GO:0007165//signal transduction	GO:0043531//ADP binding	GO:0005622//intracellular
Unigene17547_All	213	1.246	0.8363	1.4761	--	--	--	--	--	--	--	--	--	--	--	--	--	--	--	--	--	--	--	--	--	--	-	-	-
Unigene17556_All	2787	3.8249	4.4423	3.2554	gi|359491046|ref|XP_003634211.1|	77	1e-12	PREDICTED: uncharacterized protein LOC100259538 [Vitis vinifera]	gi|359491045|ref|XM_003634163.1|	361	2e-96	PREDICTED: Vitis vinifera uncharacterized LOC100259538 (LOC100259538), mRNA	--	--	--	--	--	--	--	--	--	K08789	8e-07	54.7	vcn:VOLCADRAFT_42650	microtubule-associated serine/threonine kinase [EC:2.7.11.1]	GO:0046777//protein autophosphorylation	GO:0004674//protein serine/threonine kinase activity;GO:0000166//nucleotide binding	GO:0005886//plasma membrane;GO:0005829//cytosol
Unigene17576_All	311	1.4223	1.0024	3.6105	--	--	--	--	--	--	--	--	--	--	--	--	--	--	--	--	--	--	--	--	--	--	-	-	-
Unigene18406_All	3161	6.9827	7.9461	9.3494	gi|292385868|gb|ADE22249.1|	195.7	3e-48	somatic embryogenesis receptor-like kinase 1 [Ageratina adenophora]	gi|292385867|gb|GU723280.1|	1043	0	Ageratina adenophora somatic embryogenesis receptor-like kinase 1 (SERK1) mRNA, complete cds	sp|Q94F62|BAK1_ARATH	632	0	BRASSINOSTEROID INSENSITIVE 1-associated receptor kinase 1 OS=Arabidopsis thaliana GN=BAK1 PE=1 SV=2	YAR019c	92	6e-18	COG0515	Serine/threonine protein kinase	K13416	0	652	rcu:RCOM_1534760	brassinosteroid insensitive 1-associated receptor kinase 1 [EC:2.7.10.1 2.7.11.1]	GO:0010363//regulation of plant-type hypersensitive response;GO:0002679//respiratory burst involved in defense response;GO:0010200//response to chitin;GO:0002229//defense response to oomycetes;GO:0006612//protein targeting to membrane;GO:0050832//defense response to fungus;GO:0042742//defense response to bacterium;GO:0043069//negative regulation of programmed cell death;GO:0006468//protein phosph…	GO:0032440//2-alkenal reductase [NAD(P)] activity;GO:0046982//protein heterodimerization activity;GO:0004674//protein serine/threonine kinase activity;GO:0004714//transmembrane receptor protein tyrosine kinase activity;GO:0033612//receptor serine/threonine kinase binding;GO:0005524//ATP binding	GO:0016021//integral to membrane;GO:0043234//protein complex;GO:0005768//endosome;GO:0005886//plasma membrane
Unigene18602_All	2150	43.6362	36.622	36.7044	gi|225456787|ref|XP_002277300.1|	469.5	8e-131	PREDICTED: zinc finger CCCH domain-containing protein 43 isoform 1 [Vitis vinifera] >gi|297733636|emb|CBI14883.3| unnamed protein product [Vitis vinifera]	gi|225314016|dbj|AK320763.1|	97.6	4e-17	Solanum lycopersicum cDNA, clone: LEFL1013AA09, HTC in leaf	sp|Q9STM4|C3H43_ARATH	383	3e-106	Zinc finger CCCH domain-containing protein 43 OS=Arabidopsis thaliana GN=At3g48440 PE=1 SV=1	XF0818	60.5	1e-08	COG2730	Endoglucanase	K08852	8e-18	90.9	vcn:VOLCADRAFT_107956	serine/threonine-protein kinase/endoribonuclease IRE1 [EC:2.7.11.1 3.1.26.-]	GO:0006355//regulation of transcription, DNA-dependent	GO:0005488//binding	-
Unigene18654_All	1621	3.8475	3.2694	4.5995	gi|224061655|ref|XP_002300588.1|	654.4	0	actin related protein [Populus trichocarpa] >gi|222847846|gb|EEE85393.1| actin related protein [Populus trichocarpa]	gi|356508162|ref|XM_003522781.1|	180	3e-42	PREDICTED: Glycine max actin-related protein 8-like (LOC100791973), mRNA	sp|Q9FKT0|ARP8_ARATH	617	4e-177	Actin-related protein 8 OS=Arabidopsis thaliana GN=ARP8 PE=2 SV=1	SPBC32H8.12c	140	5e-33	COG5277	Actin and related proteins	K05692	1e-32	139	mtr:MTR_2g008050	actin beta/gamma 1	GO:0030029//actin filament-based process	GO:0005200//structural constituent of cytoskeleton	GO:0005739//mitochondrion;GO:0005634//nucleus
Unigene18690_All	896	4.6899	3.0319	3.5591	gi|359487804|ref|XP_002280635.2|	83.2	5e-15	PREDICTED: uncharacterized protein LOC100263126 [Vitis vinifera]	gi|156523307|gb|AC209036.1|	63.9	3e-07	Populus trichocarpa clone POP004-K05, complete sequence	--	--	--	--	--	--	--	--	--	K02350	1e-15	81.6	rcu:RCOM_1431670	DNA polymerase zeta subunit [EC:2.7.7.7]	-	-	-
Unigene18695_All	3277	6.1416	5.0555	5.7565	gi|224077052|ref|XP_002305110.1|	1459.9	0	predicted protein [Populus trichocarpa] >gi|222848074|gb|EEE85621.1| predicted protein [Populus trichocarpa]	gi|359483873|ref|XR_139810.1|	634	1e-178	PREDICTED: Vitis vinifera uncharacterized LOC100257282 (LOC100257282), miscRNA	sp|F4JJP1|Y4759_ARATH	77	6e-14	WEB family protein At4g27595, chloroplastic OS=Arabidopsis thaliana GN=At4g27595 PE=2 SV=1	YHR023w	77	2e-13	COG5022	Myosin heavy chain	K10400	3e-14	79.7	ota:Ot08g00860	kinesin family member 15	GO:0000911//cytokinesis by cell plate formation;GO:0006955//immune response;GO:0000226//microtubule cytoskeleton organization;GO:0006184//GTP catabolic process	GO:0003924//GTPase activity;GO:0005525//GTP binding	GO:0005730//nucleolus;GO:0009507//chloroplast
Unigene18793_All	1401	7.8299	7.6291	8.8803	gi|359477348|ref|XP_002278432.2|	163.3	7e-39	PREDICTED: uncharacterized protein LOC100247619 [Vitis vinifera]	--	--	--	--	--	--	--	--	--	--	--	--	--	--	--	--	--	--	-	-	-
Unigene18824_All	534	2.0708	1.8348	2.1027	gi|218198623|gb|EEC81050.1|	56.2	2e-07	hypothetical protein OsI_23843 [Oryza sativa Indica Group]	gi|261597399|gb|GU011811.1|	75.8	4e-11	Tabebuia rosea microsatellite D111_M13R_seg123 sequence	sp|Q9ZT63|MTP1_ARATH	52	2e-07	Metal tolerance protein 1 OS=Arabidopsis thaliana GN=MTP1 PE=1 SV=2	YOR054c	61.6	7e-10	COG0452	Phosphopantothenoylcysteine synthetase/decarboxylase	K14692	1e-10	64.3	vvi:100252487	solute carrier family 30 (zinc transporter), member 5	GO:0008152//metabolic process	GO:0003824//catalytic activity	-
Unigene18954_All	723	105.779	101.943	85.1694	gi|410633|gb|AAB28041.1|	233.8	1e-60	cytochrome c reductase-processing peptidase subunit I, MPP subunit I, P55 [potatoes, var. Marfona, tuber, Peptide Mitochondrial, 534 aa]	gi|177358726|gb|AC225040.1|	109	4e-21	Solanum lycopersicum cv. Heinz 1706, chromosome 5 BAC clone C05SLm0079C22, complete sequence	sp|Q42290|MPPB_ARATH	201	3e-52	Probable mitochondrial-processing peptidase subunit beta OS=Arabidopsis thaliana GN=At3g02090 PE=1 SV=2	YLR163c	100	2e-21	COG0612	Predicted Zn-dependent peptidases	K01412	2e-59	226	pop:POPTR_736441	mitochondrial processing peptidase [EC:3.4.24.64]	GO:0051788//response to misfolded protein;GO:0006098//pentose-phosphate shunt;GO:0009853//photorespiration;GO:0009651//response to salt stress;GO:0080129//proteasome core complex assembly;GO:0006511//ubiquitin-dependent protein catabolic process;GO:0046686//response to cadmium ion	GO:0008270//zinc ion binding;GO:0004222//metalloendopeptidase activity	GO:0005774//vacuolar membrane;GO:0005758//mitochondrial intermembrane space;GO:0005759//mitochondrial matrix;GO:0009507//chloroplast;GO:0005618//cell wall;GO:0005730//nucleolus;GO:0005741//mitochondrial outer membrane;GO:0005750//mitochondrial respiratory chain complex III
Unigene19168_All	1636	30.3087	36.6948	33.4386	gi|225453883|ref|XP_002273090.1|	594	2e-168	PREDICTED: adenosine 3&apos;-phospho 5&apos;-phosphosulfate transporter 2 [Vitis vinifera] >gi|296089139|emb|CBI38842.3| unnamed protein product [Vitis vinifera]	gi|356532049|ref|XM_003534539.1|	343	3e-91	PREDICTED: Glycine max adenosine 3'-phospho 5'-phosphosulfate transporter 2-like, transcript variant 1 (LOC100778968), mRNA	sp|Q9LDX3|UTR4_ARATH	575	3e-164	UDP-galactose/UDP-glucose transporter 4 OS=Arabidopsis thaliana GN=UTR4 PE=2 SV=1	SPBC839.11c	84.7	4e-16	COG0697	Permeases of the drug/metabolite transporter (DMT) superfamily	K15277	2e-169	593	vvi:100242001	solute carrier family 35 (adenosine 3'-phospho 5'-phosphosulfate transporter), member B3	GO:0072334//UDP-galactose transmembrane transport	GO:0005459//UDP-galactose transmembrane transporter activity	GO:0005886//plasma membrane;GO:0030173//integral to Golgi membrane
Unigene19388_All	1723	39.2781	31.8696	31.5677	gi|224079549|ref|XP_002305888.1|	738.8	0	predicted protein [Populus trichocarpa] >gi|222848852|gb|EEE86399.1| predicted protein [Populus trichocarpa]	gi|225314483|dbj|AK327833.1|	650	0	Solanum lycopersicum cDNA, clone: LEFL2039B04, HTC in fruit	sp|Q56Y85|AMP2B_ARATH	731	0	Methionine aminopeptidase 2B OS=Arabidopsis thaliana GN=MAP2B PE=2 SV=2	SPBC14C8.03	527	3e-149	COG0024	Methionine aminopeptidase	K01265	0	738	pop:POPTR_1075814	methionyl aminopeptidase [EC:3.4.11.18]	GO:0009627//systemic acquired resistance;GO:0031347//regulation of defense response;GO:0016485//protein processing;GO:0006499//N-terminal protein myristoylation;GO:0006508//proteolysis;GO:0010048//vernalization response	GO:0046872//metal ion binding;GO:0008235//metalloexopeptidase activity;GO:0004177//aminopeptidase activity	GO:0005737//cytoplasm
Unigene19424_All	1719	23.0299	21.2699	23.7505	gi|225460674|ref|XP_002266272.1|	536.6	4e-151	PREDICTED: uncharacterized protein LOC100259010 [Vitis vinifera]	gi|225460673|ref|XM_002266236.1|	163	7e-37	PREDICTED: Vitis vinifera uncharacterized LOC100259010 (LOC100259010), mRNA	--	--	--	--	--	--	--	--	--	--	--	--	--	--	GO:0006355//regulation of transcription, DNA-dependent	GO:0003700//sequence-specific DNA binding transcription factor activity;GO:0003677//DNA binding	GO:0005634//nucleus
Unigene19498_All	427	3.0041	2.9203	1.0519	gi|225446289|ref|XP_002267226.1|	72.4	2e-12	PREDICTED: F-box protein At5g07610 [Vitis vinifera] >gi|296090309|emb|CBI40128.3| unnamed protein product [Vitis vinifera]	--	--	--	--	sp|Q9FLS0|FB253_ARATH	54.3	3e-08	F-box protein At5g07610 OS=Arabidopsis thaliana GN=At5g07610 PE=2 SV=1	--	--	--	--	--	--	--	--	--	--	-	-	-
Unigene19832_All	2764	30.5501	26.3116	24.5859	gi|224122440|ref|XP_002318837.1|	991.5	0	predicted protein [Populus trichocarpa] >gi|222859510|gb|EEE97057.1| predicted protein [Populus trichocarpa]	gi|359490400|ref|XM_002279727.2|	383	1e-103	PREDICTED: Vitis vinifera uncharacterized LOC100265879 (LOC100265879), mRNA	sp|Q8W234|SEUSS_ARATH	424	1e-118	Transcriptional corepressor SEUSS OS=Arabidopsis thaliana GN=SEU PE=1 SV=1	--	--	--	--	--	K15168	2e-09	63.5	gmx:100801664	mediator of RNA polymerase II transcription subunit 25	GO:0009790//embryo development;GO:0048481//ovule development	-	-
Unigene19909_All	291	3.3441	3.673	2.4695	gi|388521525|gb|AFK48824.1|	57.8	5e-08	unknown [Medicago truncatula]	gi|158631268|gb|AC213124.1|	65.9	2e-08	Oryza glaberrima clone OG_BBa0008P09, complete sequence	sp|Q6YSF3|AN321_ORYSJ	47.4	2e-06	Acidic leucine-rich nuclear phosphoprotein 32-related protein 1 OS=Oryza sativa subsp. japonica GN=Os07g0607800 PE=2 SV=1	YOR054c	49.7	1e-06	COG0452	Phosphopantothenoylcysteine synthetase/decarboxylase	K11279	2e-06	48.5	rcu:RCOM_0655640	nucleosome assembly protein 1-like 1	-	-	-
Unigene19911_All	282	3.7645	2.6847	0.7964	gi|147810796|emb|CAN76165.1|	54.3	5e-07	hypothetical protein VITISV_022943 [Vitis vinifera]	gi|356520064|ref|XM_003528638.1|	75.8	2e-11	PREDICTED: Glycine max uncharacterized protein LOC100791504 (LOC100791504), mRNA	sp|Q9M086|DCAF1_ARATH	45.1	9e-06	DDB1- and CUL4-associated factor homolog 1 OS=Arabidopsis thaliana GN=DCAF1 PE=1 SV=2	XF1267	52	3e-07	COG5297	Cellobiohydrolase A (1,4-beta-cellobiosidase A)	K11323	3e-08	54.7	vcn:VOLCADRAFT_121342	histone arginine demethylase JMJD6 [EC:1.14.11.-]	-	-	-
Unigene19991_All	656	0.6069	3.055	1.0955	gi|224133654|ref|XP_002321628.1|	359.8	1e-98	predicted protein [Populus trichocarpa] >gi|222868624|gb|EEF05755.1| predicted protein [Populus trichocarpa]	gi|225456908|ref|XM_002277724.1|	85.7	5e-14	PREDICTED: Vitis vinifera ferric reduction oxidase 8, mitochondrial-like (LOC100241516), mRNA	sp|Q8VY13|FRO8_ARATH	314	2e-86	Ferric reduction oxidase 8, mitochondrial OS=Arabidopsis thaliana GN=FRO8 PE=2 SV=1	--	--	--	--	--	K13447	1e-11	68.2	vvi:100261299	respiratory burst oxidase [EC:1.6.3.- 1.11.1.-]	GO:0055114//oxidation-reduction process;GO:0010106//cellular response to iron ion starvation;GO:0006826//iron ion transport;GO:0000023//maltose metabolic process;GO:0019252//starch biosynthetic process;GO:0006833//water transport;GO:0019761//glucosinolate biosynthetic process;GO:0019745//pentacyclic triterpenoid biosynthetic process;GO:0016126//sterol biosynthetic process	GO:0000293//ferric-chelate reductase activity;GO:0016174//NAD(P)H oxidase activity;GO:0016705//oxidoreductase activity, acting on paired donors, with incorporation or reduction of molecular oxygen;GO:0009055//electron carrier activity;GO:0050660//flavin adenine dinucleotide binding;GO:0020037//heme binding;GO:0005506//iron ion binding	GO:0005739//mitochondrion;GO:0016021//integral to membrane;GO:0005886//plasma membrane
Unigene20280_All	830	8.2071	5.0437	5.249	gi|255559444|ref|XP_002520742.1|	243.8	2e-63	cyclin-dependent protein kinase, putative [Ricinus communis] >gi|223540127|gb|EEF41704.1| cyclin-dependent protein kinase, putative [Ricinus communis]	gi|15004275|gb|AF231774.1|AF231774	61.9	9e-07	Pinus taeda clone LC6m7 microsatellite sequence	sp|Q75HV0|CCP31_ORYSJ	207	6e-54	Cyclin-P3-1 OS=Oryza sativa subsp. japonica GN=CYCP3-1 PE=3 SV=1	--	--	--	--	--	--	--	--	--	--	GO:0000079//regulation of cyclin-dependent protein kinase activity	GO:0016301//kinase activity;GO:0019901//protein kinase binding	-
Unigene20347_All	1224	27.501	21.0667	20.9527	gi|255547053|ref|XP_002514584.1|	320.1	4e-86	conserved hypothetical protein [Ricinus communis] >gi|223546188|gb|EEF47690.1| conserved hypothetical protein [Ricinus communis]	gi|403043884|ref|NM_001254306.2|	180	2e-42	Glycine max transcription factor BIM2-like (LOC100816055), mRNA	sp|Q9CAA4|BIM2_ARATH	261	8e-70	Transcription factor BIM2 OS=Arabidopsis thaliana GN=BIM2 PE=1 SV=1	--	--	--	--	--	K12126	2e-08	58.9	ath:AT1G09530	phytochrome-interacting factor 3	-	-	-
Unigene20361_All	347	5.3538	9.4973	8.5428	--	--	--	--	--	--	--	--	--	--	--	--	--	--	--	--	--	--	--	--	--	--	-	-	-
Unigene20482_All	591	3.2183	3.3156	1.8239	gi|224064484|ref|XP_002301499.1|	107.1	1e-22	predicted protein [Populus trichocarpa] >gi|222843225|gb|EEE80772.1| predicted protein [Populus trichocarpa]	--	--	--	--	--	--	--	--	--	--	--	--	--	K01887	2e-23	107	pop:POPTR_711240	arginyl-tRNA synthetase [EC:6.1.1.19]	GO:0048827//phyllome development;GO:0006412//translation;GO:0006139//nucleobase-containing compound metabolic process;GO:0044281//small molecule metabolic process;GO:0009793//embryo development ending in seed dormancy	GO:0016874//ligase activity	GO:0005739//mitochondrion;GO:0009570//chloroplast stroma
Unigene20489_All	1177	15.5585	18.0485	23.4302	gi|225448154|ref|XP_002264418.1|	305.1	1e-81	PREDICTED: nifU-like protein 2, chloroplastic [Vitis vinifera] >gi|297739542|emb|CBI29724.3| unnamed protein product [Vitis vinifera]	gi|359486165|ref|XM_002264382.2|	268	1e-68	PREDICTED: Vitis vinifera nifU-like protein 2, chloroplastic (LOC100254178), mRNA	sp|Q93W20|NIFU2_ARATH	282	2e-76	NifU-like protein 2, chloroplastic OS=Arabidopsis thaliana GN=NIFU2 PE=1 SV=1	asr1309	108	2e-23	COG0694	Thioredoxin-like proteins and domains	--	--	--	--	--	GO:0016226//iron-sulfur cluster assembly;GO:0009658//chloroplast organization	GO:0051536//iron-sulfur cluster binding;GO:0005506//iron ion binding;GO:0005198//structural molecule activity	GO:0009570//chloroplast stroma
Unigene21026_All	293	1.8116	2.5839	1.2263	gi|222422993|dbj|BAH19480.1|	65.9	1e-10	AT1G70070 [Arabidopsis thaliana]	gi|359482779|ref|XM_002269341.2|	65.9	2e-08	PREDICTED: Vitis vinifera uncharacterized LOC100259959 (LOC100259959), mRNA	sp|B9DFG3|ISE2_ARATH	65.9	5e-12	DEAD-box ATP-dependent RNA helicase ISE2, chloroplastic OS=Arabidopsis thaliana GN=ISE2 PE=1 SV=2	YKR072c	47	8e-06	COG0452	Phosphopantothenoylcysteine synthetase/decarboxylase	K11323	1e-08	55.8	vcn:VOLCADRAFT_121342	histone arginine demethylase JMJD6 [EC:1.14.11.-]	GO:0010497//plasmodesmata-mediated intercellular transport;GO:0016556//mRNA modification;GO:0016441//posttranscriptional gene silencing;GO:0009793//embryo development ending in seed dormancy	GO:0097159//organic cyclic compound binding;GO:0004386//helicase activity;GO:1901363	GO:0010494//cytoplasmic stress granule;GO:0009570//chloroplast stroma
Unigene21570_All	956	6.2463	4.7516	7.1882	gi|302398749|gb|ADL36669.1|	189.5	6e-47	COL domain class transcription factor [Malus x domestica]	gi|302398748|gb|HM122530.1|	153	4e-34	Malus x domestica COL domain class transcription factor (COL14) mRNA, complete cds	sp|Q9C7E8|COL15_ARATH	135	3e-32	Zinc finger protein CONSTANS-LIKE 15 OS=Arabidopsis thaliana GN=COL15 PE=2 SV=1	--	--	--	--	--	K12135	4e-08	57	aly:ARALYDRAFT_488429	zinc finger protein CONSTANS	-	-	-
Unigene21756_All	927	5.9645	5.6689	6.2018	gi|255567754|ref|XP_002524855.1|	263.1	4e-69	ATP binding protein, putative [Ricinus communis] >gi|223535818|gb|EEF37479.1| ATP binding protein, putative [Ricinus communis]	gi|7381246|gb|AF139523.1|AF139523	123	3e-25	Tagetes erecta disease-resistance protein NRSA1 gene, complete cds	sp|Q40392|TMVRN_NICGU	241	3e-64	TMV resistance protein N OS=Nicotiana glutinosa GN=N PE=1 SV=1	--	--	--	--	--	--	--	--	--	--	-	GO:0000166//nucleotide binding	-
Unigene21794_All	3162	6.0292	4.4929	4.6448	gi|356524443|ref|XP_003530838.1|	491.1	4e-137	PREDICTED: uncharacterized protein LOC100807262 [Glycine max]	--	--	--	--	sp|Q9S775|PKL_ARATH	129	1e-29	CHD3-type chromatin-remodeling factor PICKLE OS=Arabidopsis thaliana GN=PKL PE=1 SV=1	SPAC15A10.03c	145	3e-34	COG0553	Superfamily II DNA/RNA helicases, SNF2 family	K10779	5e-55	214	smo:SELMODRAFT_443867	transcriptional regulator ATRX [EC:3.6.4.12]	GO:0007267//cell-cell signaling;GO:0035196//production of miRNAs involved in gene silencing by miRNA;GO:0010267//production of ta-siRNAs involved in RNA interference;GO:0009909//regulation of flower development;GO:0034968//histone lysine methylation;GO:0009616//virus induced gene silencing	GO:0003676//nucleic acid binding;GO:0003824//catalytic activity	-
Unigene21795_All	3251	6.6125	5.5754	4.7111	gi|356524443|ref|XP_003530838.1|	488.4	2e-136	PREDICTED: uncharacterized protein LOC100807262 [Glycine max]	--	--	--	--	sp|Q9S775|PKL_ARATH	129	1e-29	CHD3-type chromatin-remodeling factor PICKLE OS=Arabidopsis thaliana GN=PKL PE=1 SV=1	SPAC15A10.03c	145	3e-34	COG0553	Superfamily II DNA/RNA helicases, SNF2 family	K10779	7e-55	214	smo:SELMODRAFT_443867	transcriptional regulator ATRX [EC:3.6.4.12]	GO:0007267//cell-cell signaling;GO:0035196//production of miRNAs involved in gene silencing by miRNA;GO:0010267//production of ta-siRNAs involved in RNA interference;GO:0009909//regulation of flower development;GO:0034968//histone lysine methylation;GO:0009616//virus induced gene silencing	GO:0003676//nucleic acid binding;GO:0003824//catalytic activity	-
Unigene2183_All	953	19.3548	9.2995	5.5141	gi|387135332|gb|AFJ53047.1|	259.2	6e-68	tannin-related R2R3 MYB transcription factor, partial [Trifolium affine]	gi|389827981|gb|JQ989282.1|	184	1e-43	Fragaria x ananassa transcription factor MYB11 mRNA, complete cds	sp|P10290|MYBC_MAIZE	199	2e-51	Anthocyanin regulatory C1 protein OS=Zea mays GN=C1 PE=2 SV=1	ECU11g1690	96.3	7e-20	COG5147	Myb superfamily proteins, including transcription factors and mRNA splicing factors	K09422	3e-63	240	vvi:100244051	myb proto-oncogene protein, plant	-	-	-
Unigene22046_All	472	2.624	2.0758	3.4257	--	--	--	--	--	--	--	--	--	--	--	--	--	--	--	--	--	--	--	--	--	--	-	-	-
Unigene22174_All	1683	11.9058	6.6154	7.0721	gi|225425402|ref|XP_002271312.1|	335.9	1e-90	PREDICTED: squamosa promoter-binding-like protein 12-like [Vitis vinifera]	gi|148538993|dbj|AK247759.1|	75.8	1e-10	Solanum lycopersicum cDNA, clone: LEFL2006J11, HTC in fruit	sp|A2YGR5|SPL12_ORYSI	238	8e-63	Squamosa promoter-binding-like protein 12 OS=Oryza sativa subsp. indica GN=SPL12 PE=2 SV=1	--	--	--	--	--	--	--	--	--	--	-	-	-
Unigene22245_All	661	5.8219	7.4112	8.2218	gi|359488508|ref|XP_002277565.2|	173.3	2e-42	PREDICTED: receptor-like protein kinase FERONIA-like [Vitis vinifera]	--	--	--	--	sp|Q9FID9|Y5389_ARATH	153	9e-38	Probable receptor-like protein kinase At5g38990 OS=Arabidopsis thaliana GN=At5g38990 PE=2 SV=1	YAR019c	75.1	9e-14	COG0515	Serine/threonine protein kinase	K04733	7e-38	155	aly:ARALYDRAFT_916421	interleukin-1 receptor-associated kinase 4 [EC:2.7.11.1]	-	GO:0016772//transferase activity, transferring phosphorus-containing groups	-
Unigene22251_All	2301	8.6313	7.6644	6.9684	gi|297734075|emb|CBI15322.3|	598.6	1e-169	unnamed protein product [Vitis vinifera]	gi|359491360|ref|XM_002265446.2|	89.7	1e-14	PREDICTED: Vitis vinifera kelch domain-containing protein 3-like (LOC100251831), mRNA	sp|Q9MA55|ACBP4_ARATH	121	1e-27	Acyl-CoA-binding domain-containing protein 4 OS=Arabidopsis thaliana GN=ACBP4 PE=1 SV=1	--	--	--	--	--	K15450	4e-28	125	smo:SELMODRAFT_418563	tRNA wybutosine-synthesizing protein 3 [EC:2.1.1.-]	-	-	GO:0044424//intracellular part
Unigene22302_All	1088	14.148	7.2451	6.894	gi|225451954|ref|XP_002283161.1|	382.1	7e-105	PREDICTED: probable transmembrane ascorbate ferrireductase 2 [Vitis vinifera]	gi|148537585|dbj|AK246351.1|	155	1e-34	Solanum lycopersicum cDNA, clone: FC08BD08, HTC in fruit	sp|Q9SWS1|ACFR2_ARATH	335	2e-92	Probable transmembrane ascorbate ferrireductase 2 OS=Arabidopsis thaliana GN=CYB561B PE=2 SV=1	--	--	--	--	--	K08360	7e-106	382	vvi:100251417	cytochrome b-561	GO:0009744//response to sucrose stimulus;GO:0009749//response to glucose stimulus;GO:0009750//response to fructose stimulus	GO:0008805//carbon-monoxide oxygenase activity	GO:0005794//Golgi apparatus;GO:0016023//cytoplasmic membrane-bounded vesicle;GO:0016021//integral to membrane
Unigene2243_All	766	3.0027	3.8953	4.6322	gi|224097892|ref|XP_002311089.1|	288.1	8e-77	predicted protein [Populus trichocarpa] >gi|222850909|gb|EEE88456.1| predicted protein [Populus trichocarpa]	gi|145349425|ref|NM_119154.4|	161	1e-36	Arabidopsis thaliana auxin response factor 16 (ARF16) mRNA, complete cds	sp|Q93YR9|ARFP_ARATH	267	6e-72	Auxin response factor 16 OS=Arabidopsis thaliana GN=ARF16 PE=2 SV=1	--	--	--	--	--	K14486	2e-22	103	pop:POPTR_589324	auxin response factor	GO:0080090//regulation of primary metabolic process;GO:0051301//cell division;GO:0009733//response to auxin stimulus;GO:0031326;GO:0048829//root cap development;GO:0009755//hormone-mediated signaling pathway;GO:0048608//reproductive structure development;GO:0006351//transcription, DNA-dependent;GO:0007389//pattern specification process	GO:0003676//nucleic acid binding	GO:0005634//nucleus
Unigene22460_All	1560	24.3564	27.3489	25.6242	gi|225436055|ref|XP_002276040.1|	367.9	2e-100	PREDICTED: uncharacterized protein LOC100263294 [Vitis vinifera]	gi|300681517|emb|FN564434.1|	133	6e-28	Triticum aestivum chromosome 3B-specific BAC library, contig ctg0954b	sp|Q6Z1C0|NUCL1_ORYSJ	107	2e-23	Nucleolin 1 OS=Oryza sativa subsp. japonica GN=Os08g0192900 PE=2 SV=1	SPAC140.02	112	1e-24	COG0724	RNA-binding proteins (RRM domain)	K11294	5e-23	107	ppp:PHYPADRAFT_167900	nucleolin	GO:0009987//cellular process;GO:0050896//response to stimulus;GO:0044699;GO:0008152//metabolic process	GO:0003723//RNA binding	GO:0005737//cytoplasm
Unigene2253_All	871	69.1169	59.6693	57.548	gi|58220034|gb|AAW67545.1|	355.5	5e-97	ADP-ribosylation factor [Daucus carota]	gi|58220033|gb|AY874441.1|	289	2e-75	Daucus carota ADP-ribosylation factor mRNA, complete cds	sp|P51823|ARF2_ORYSJ	236	2e-62	ADP-ribosylation factor 2 OS=Oryza sativa subsp. japonica GN=ARF PE=2 SV=2	YDL137w	234	2e-61	COG1100	GTPase SAR1 and related small G proteins	K07977	2e-94	343	aly:ARALYDRAFT_488569	Arf/Sar family, other	GO:0007264//small GTPase mediated signal transduction;GO:0006499//N-terminal protein myristoylation;GO:0006888//ER to Golgi vesicle-mediated transport;GO:0006886//intracellular protein transport	GO:0005215//transporter activity;GO:0005525//GTP binding	GO:0005794//Golgi apparatus
Unigene22814_All	2647	17.9638	14.8729	15.5087	gi|297734212|emb|CBI15459.3|	924.5	0	unnamed protein product [Vitis vinifera]	gi|356529576|ref|XM_003533318.1|	165	3e-37	PREDICTED: Glycine max chloroplastic group IIA intron splicing facilitator CRS1, chloroplastic-like (LOC100808013), mRNA	sp|Q6YYA3|CRS1_ORYSJ	411	8e-115	Chloroplastic group IIA intron splicing facilitator CRS1, chloroplastic OS=Oryza sativa subsp. japonica GN=Os08g0360100 PE=2 SV=1	--	--	--	--	--	--	--	--	--	--	GO:0006655//phosphatidylglycerol biosynthetic process;GO:0009902//chloroplast relocation;GO:0019288//isopentenyl diphosphate biosynthetic process, mevalonate-independent pathway;GO:0016117//carotenoid biosynthetic process;GO:0010027//thylakoid membrane organization;GO:0009737//response to abscisic acid stimulus;GO:0034660//ncRNA metabolic process;GO:0009793//embryo development ending in seed dorm…	GO:0097159//organic cyclic compound binding;GO:0016491//oxidoreductase activity;GO:1901363	GO:0009507//chloroplast
Unigene22861_All	1044	15.7187	12.6694	12.046	gi|356548719|ref|XP_003542747.1|	310.5	2e-83	PREDICTED: 50S ribosomal protein L21, mitochondrial-like [Glycine max]	gi|225315078|dbj|AK328228.1|	161	2e-36	Solanum lycopersicum cDNA, clone: LEFL2050A07, HTC in fruit	sp|Q8L9A0|RM21_ARATH	252	3e-67	50S ribosomal protein L21, mitochondrial OS=Arabidopsis thaliana GN=RPL21M PE=2 SV=1	RC1162	89.4	1e-17	COG0261	Ribosomal protein L21	K02888	2e-30	131	vvi:100255002	large subunit ribosomal protein L21	GO:0000741//karyogamy;GO:0051567//histone H3-K9 methylation;GO:0001510//RNA methylation;GO:0006007//glucose catabolic process;GO:0006333//chromatin assembly or disassembly;GO:0009567//double fertilization forming a zygote and endosperm;GO:0006342//chromatin silencing;GO:0009560//embryo sac egg cell differentiation;GO:0009555//pollen development;GO:0016572//histone phosphorylation;GO:0006606//prot…	GO:0003677//DNA binding;GO:0003723//RNA binding;GO:0003682//chromatin binding;GO:0030527//structural constituent of chromatin	GO:0000785//chromatin;GO:0005634//nucleus;GO:0005739//mitochondrion
Unigene23005_All	460	1.827	3.0981	4.1985	gi|255587797|ref|XP_002534399.1|	63.2	1e-09	Floral homeotic protein APETALA2, putative [Ricinus communis] >gi|223525368|gb|EEF27984.1| Floral homeotic protein APETALA2, putative [Ricinus communis]	gi|28894442|gb|AY223518.1|	60	2e-06	Antirrhinum majus LIPLESS1 (lip1) mRNA, complete cds	--	--	--	--	--	--	--	--	--	K09284	2e-10	63.2	rcu:RCOM_0394760	AP2-like factor, euAP2 lineage	-	-	-
Unigene23085_All	435	1.4236	1.4333	2.065	gi|359481563|ref|XP_002277659.2|	155.2	2e-37	PREDICTED: uncharacterized protein LOC100250012 [Vitis vinifera]	gi|224089940|ref|XM_002308838.1|	60	2e-06	Populus trichocarpa predicted protein, mRNA	sp|Q9FHK9|MD26B_ARATH	124	2e-29	Probable mediator of RNA polymerase II transcription subunit 26b OS=Arabidopsis thaliana GN=MED26B PE=2 SV=1	--	--	--	--	--	K03145	1e-06	50.1	pop:POPTR_560996	transcription elongation factor S-II	GO:0009753//response to jasmonic acid stimulus;GO:0009620//response to fungus;GO:0009611//response to wounding;GO:0009695//jasmonic acid biosynthetic process;GO:0010200//response to chitin;GO:0006351//transcription, DNA-dependent	-	-
Unigene23117_All	1421	30.1941	42.0901	51.3938	gi|12003394|gb|AAG43554.1|AF211536_1	478	1e-133	Avr9/Cf-9 rapidly elicited protein 231 [Nicotiana tabacum]	gi|332071124|gb|GU997657.1|	198	1e-47	Panax notoginseng clone 02051n glycosyltransferase mRNA, complete cds	sp|Q9LHD2|GATLA_ARATH	452	3e-127	Probable galacturonosyltransferase-like 10 OS=Arabidopsis thaliana GN=GATL10 PE=2 SV=1	PM1139	69.7	1e-11	COG1442	Lipopolysaccharide biosynthesis proteins, LPS:glycosyltransferases	K13648	4e-22	104	gmx:100805886	alpha-1,4-galacturonosyltransferase [EC:2.4.1.43]	GO:0035556//intracellular signal transduction;GO:0030968//endoplasmic reticulum unfolded protein response;GO:0006979//response to oxidative stress;GO:0016051//carbohydrate biosynthetic process;GO:0009738//abscisic acid mediated signaling pathway	GO:0047262//polygalacturonate 4-alpha-galacturonosyltransferase activity	GO:0005794//Golgi apparatus
Unigene23387_All	2509	22.0723	20.2527	24.7217	gi|3806016|gb|AAC69177.1|	1126.3	0	peroxisomal targeting signal 1 receptor [Nicotiana tabacum]	gi|134303395|gb|EF469882.1|	1715	0	Helianthus annuus RFLP probe ZVG23 mRNA sequence	sp|Q9FMA3|PEX5_ARATH	978	0	Peroxisome biogenesis protein 5 OS=Arabidopsis thaliana GN=PEX5 PE=1 SV=1	all1322_2	85.5	4e-16	COG0457	FOG: TPR repeat	K13342	0	1087	pop:POPTR_837219	peroxin-5	GO:0016558//protein import into peroxisome matrix;GO:0006891//intra-Golgi vesicle-mediated transport;GO:0006869//lipid transport;GO:0009733//response to auxin stimulus;GO:0006635//fatty acid beta-oxidation;GO:0010351//lithium ion transport	GO:0005052//peroxisome matrix targeting signal-1 binding;GO:0005515//protein binding	GO:0005829//cytosol;GO:0005778//peroxisomal membrane;GO:0005634//nucleus
Unigene2353_All	866	10.1133	40.3692	61.9776	--	--	--	--	--	--	--	--	--	--	--	--	--	--	--	--	--	--	--	--	--	--	-	-	-
Unigene23553_All	398	1.8893	2.2379	2.257	gi|147810796|emb|CAN76165.1|	65.9	1e-10	hypothetical protein VITISV_022943 [Vitis vinifera]	gi|238837122|gb|FJ434727.1|	63.9	1e-07	Karenia brevis clone KbrSL-U6-5S2e 5S ribosomal RNA gene, partial sequence; trans-spliced leader sequence SL and U6 snRNA genes, complete sequence; and 5S ribosomal RNA gene, partial sequence	sp|Q9LK58|PP225_ARATH	57.4	2e-09	Pentatricopeptide repeat-containing protein At3g13150 OS=Arabidopsis thaliana GN=At3g13150 PE=2 SV=1	YOR054c	86.7	1e-17	COG0452	Phosphopantothenoylcysteine synthetase/decarboxylase	K11323	3e-14	75.1	vcn:VOLCADRAFT_121342	histone arginine demethylase JMJD6 [EC:1.14.11.-]	-	GO:0003676//nucleic acid binding	GO:0005634//nucleus
Unigene23681_All	242	2.0106	2.5764	1.4848	--	--	--	--	--	--	--	--	--	--	--	--	--	--	--	--	--	--	--	--	--	--	-	-	-
Unigene238_All	1667	6.6336	4.4081	4.5534	gi|302143887|emb|CBI22748.3|	614.8	1e-174	unnamed protein product [Vitis vinifera]	gi|225470178|ref|XM_002268175.1|	107	4e-20	PREDICTED: Vitis vinifera pentatricopeptide repeat-containing protein At1g55630-like (LOC100255723), mRNA	sp|Q9M1D8|PP288_ARATH	582	3e-166	Pentatricopeptide repeat-containing protein At3g60050 OS=Arabidopsis thaliana GN=At3g60050 PE=2 SV=1	--	--	--	--	--	K15336	3e-29	128	vvi:100259391	tRNA (cytosine38-C5)-methyltransferase [EC:2.1.1.204]	-	-	GO:0005739//mitochondrion
Unigene23932_All	512	22.8075	23.1372	25.8783	gi|357454361|ref|XP_003597461.1|	67.8	7e-11	Transcription factor bHLH122 [Medicago truncatula] >gi|355486509|gb|AES67712.1| Transcription factor bHLH122 [Medicago truncatula]	--	--	--	--	--	--	--	--	--	--	--	--	--	--	--	--	--	--	-	-	-
Unigene24202_All	402	8.8026	7.4224	6.145	--	--	--	--	--	--	--	--	--	--	--	--	--	--	--	--	--	--	--	--	--	--	-	-	-
Unigene24220_All	468	1.0397	6.6612	11.3245	gi|378405610|gb|AFB82644.1|	116.7	1e-25	NAC transcription factor [Camellia sinensis]	--	--	--	--	sp|Q84TE6|NAC22_ARATH	99.4	8e-22	NAC domain-containing protein 21/22 OS=Arabidopsis thaliana GN=NAC021 PE=1 SV=2	--	--	--	--	--	--	--	--	--	--	GO:0048513//organ development;GO:0009791//post-embryonic development;GO:0050794//regulation of cellular process	-	-
Unigene24272_All	235	1.3176	1.1371	0.1911	--	--	--	--	gi|357197295|gb|JN872550.1|	58	4e-06	Millettia pinnata mitochondrion, complete genome	--	--	--	--	--	--	--	--	--	--	--	--	--	--	-	-	-
Unigene24541_All	314	1.2678	0.851	0.7152	gi|359482951|ref|XP_003632864.1|	60.5	8e-09	PREDICTED: uncharacterized protein LOC100265296 [Vitis vinifera]	--	--	--	--	--	--	--	--	--	--	--	--	--	K15304	9e-11	63.2	vvi:100265296	Ran-binding protein 3	-	-	-
Unigene24591_All	381	0.5805	2.6884	2.4756	gi|224110600|ref|XP_002315572.1|	100.9	5e-21	pho1-like protein [Populus trichocarpa] >gi|222864612|gb|EEF01743.1| pho1-like protein [Populus trichocarpa]	gi|224103980|ref|XM_002333960.1|	93.7	1e-16	Populus trichocarpa pho1-like protein, mRNA	sp|Q8S403|PHO1_ARATH	82	9e-17	Phosphate transporter PHO1 OS=Arabidopsis thaliana GN=PHO1 PE=2 SV=1	--	--	--	--	--	--	--	--	--	--	GO:0000041//transition metal ion transport;GO:0016036//cellular response to phosphate starvation;GO:0006817//phosphate ion transport	GO:0015114//phosphate ion transmembrane transporter activity	GO:0005802//trans-Golgi network;GO:0005794//Golgi apparatus;GO:0005886//plasma membrane
Unigene24681_All	248	3.0321	0.8979	1.63	--	--	--	--	--	--	--	--	--	--	--	--	--	--	--	--	--	--	--	--	--	--	-	-	-
Unigene2472_All	444	17.3345	6.4194	4.9568	--	--	--	--	gi|397529809|gb|JX047547.1|	60	2e-06	Solanum lycopersicum TAS3-12 siRNA gene, complete sequence	--	--	--	--	--	--	--	--	--	--	--	--	--	--	-	-	-
Unigene24975_All	317	1.5349	0.8429	1.7002	gi|225426566|ref|XP_002272570.1|	53.5	9e-07	PREDICTED: uncharacterized protein LOC100253094 [Vitis vinifera]	--	--	--	--	--	--	--	--	--	--	--	--	--	--	--	--	--	--	-	-	-
Unigene25313_All	1178	1.502	1.55	1.182	gi|363807385|ref|NP_001242635.1|	62.4	1e-08	uncharacterized protein LOC100788665 [Glycine max]	--	--	--	--	sp|Q8H1S0|MIOX4_ARATH	60.8	1e-09	Inositol oxygenase 4 OS=Arabidopsis thaliana GN=MIOX4 PE=2 SV=1	--	--	--	--	--	K00469	1e-09	62.4	gmx:100788665	inositol oxygenase [EC:1.13.99.1]	GO:0019853//L-ascorbic acid biosynthetic process;GO:0019310//inositol catabolic process;GO:0006949//syncytium formation;GO:0055114//oxidation-reduction process	GO:0005506//iron ion binding;GO:0050113//inositol oxygenase activity	GO:0005737//cytoplasm
Unigene25335_All	1151	2.5364	3.1728	2.8876	gi|296086057|emb|CBI31498.3|	112.1	1e-23	unnamed protein product [Vitis vinifera]	gi|225316829|dbj|AK322583.1|	61.9	1e-06	Solanum lycopersicum cDNA, clone: LEFL1039CB09, HTC in leaf	--	--	--	--	--	--	--	--	--	--	--	--	--	--	-	-	GO:0005886//plasma membrane
Unigene25342_All	1636	7.5704	6.3154	5.326	gi|356505194|ref|XP_003521377.1|	458.4	1e-127	PREDICTED: protein IQ-DOMAIN 1-like [Glycine max]	gi|225315186|dbj|AK328336.1|	121	2e-24	Solanum lycopersicum cDNA, clone: LEFL2052K14, HTC in fruit	sp|Q9SF32|IQD1_ARATH	316	3e-86	Protein IQ-DOMAIN 1 OS=Arabidopsis thaliana GN=IQD1 PE=1 SV=1	--	--	--	--	--	--	--	--	--	--	GO:0048767//root hair elongation;GO:0006007//glucose catabolic process	-	GO:0005886//plasma membrane
Unigene25389_All	1456	5.3164	3.8846	5.46	gi|356556674|ref|XP_003546648.1|	314.7	2e-84	PREDICTED: myb family transcription factor APL-like [Glycine max]	gi|359494671|ref|XM_002265764.2|	256	5e-65	PREDICTED: Vitis vinifera myb family transcription factor APL-like (LOC100256921), mRNA	sp|Q9SAK5|APL_ARATH	301	5e-82	Myb family transcription factor APL OS=Arabidopsis thaliana GN=APL PE=2 SV=2	--	--	--	--	--	K14491	1e-11	69.3	ppp:PHYPADRAFT_152341	two-component response regulator ARR-B family	GO:0010087//phloem or xylem histogenesis	-	GO:0043231//intracellular membrane-bounded organelle
Unigene25390_All	856	2.7387	1.925	2.5186	gi|30699418|ref|NP_849905.1|	274.6	1e-72	myb family transcription factor APL [Arabidopsis thaliana] >gi|229486152|sp|Q9SAK5.2|APL_ARATH RecName: Full=Myb family transcription factor APL; Short=AtAPL; AltName: Full=Protein ALTERED PHLOEM DEVELOPMENT >gi|222422919|dbj|BAH19446.1| AT1G79430 [Arabidopsis thaliana] >gi|332198121|gb|AEE36242.1| myb family transcription factor APL [Arabidopsis thaliana]	gi|359494671|ref|XM_002265764.2|	236	3e-59	PREDICTED: Vitis vinifera myb family transcription factor APL-like (LOC100256921), mRNA	sp|Q9SAK5|APL_ARATH	274	4e-74	Myb family transcription factor APL OS=Arabidopsis thaliana GN=APL PE=2 SV=2	--	--	--	--	--	K14491	1e-12	72	ota:Ot16g01320	two-component response regulator ARR-B family	GO:0010088//phloem development;GO:0010089//xylem development;GO:0006355//regulation of transcription, DNA-dependent	GO:0003700//sequence-specific DNA binding transcription factor activity;GO:0003677//DNA binding	GO:0005634//nucleus;GO:0005739//mitochondrion
Unigene25392_All	1354	1.0781	1.3156	1.9903	gi|311780285|gb|ADQ08683.1|	266.9	4e-70	IPN2 [Lotus japonicus]	gi|359494671|ref|XM_002265764.2|	236	5e-59	PREDICTED: Vitis vinifera myb family transcription factor APL-like (LOC100256921), mRNA	sp|Q9SAK5|APL_ARATH	265	3e-71	Myb family transcription factor APL OS=Arabidopsis thaliana GN=APL PE=2 SV=2	--	--	--	--	--	K14491	2e-12	72	ota:Ot16g01320	two-component response regulator ARR-B family	GO:0010088//phloem development;GO:0010089//xylem development;GO:0006355//regulation of transcription, DNA-dependent	GO:0003700//sequence-specific DNA binding transcription factor activity;GO:0003677//DNA binding	GO:0005634//nucleus;GO:0005739//mitochondrion
Unigene25442_All	820	1.4025	2.8785	2.41	gi|7438122|pir||T05433	67.4	1e-64	hypothetical protein F28A23.210 - Arabidopsis thaliana >gi|2911059|emb|CAA17569.1| putative protein [Arabidopsis thaliana] >gi|7270352|emb|CAB80120.1| putative protein [Arabidopsis thaliana]	gi|291045387|gb|AC238923.7|	101	1e-18	Solanum lycopersicum strain Heinz 1706 chromosome 1 clone hba-239e7 map 1, complete sequence	sp|Q9LDD8|MCCB_ARATH	202	5e-66	Methylcrotonoyl-CoA carboxylase beta chain, mitochondrial OS=Arabidopsis thaliana GN=MCCB PE=2 SV=1	RSc0269	133	9e-41	COG4799	Acetyl-CoA carboxylase, carboxyltransferase component (subunits alpha and beta)	K01969	1e-65	202	ath:AT4G34030	3-methylcrotonyl-CoA carboxylase beta subunit [EC:6.4.1.4]	GO:0009616//virus induced gene silencing;GO:0010050//vegetative phase change;GO:0006552//leucine catabolic process	GO:0008270//zinc ion binding;GO:0050897//cobalt ion binding;GO:0004075//biotin carboxylase activity;GO:0016421//CoA carboxylase activity	GO:0005759//mitochondrial matrix
Unigene25443_All	1988	1.2905	3.0242	2.1689	gi|224103609|ref|XP_002313120.1|	267.7	0	predicted protein [Populus trichocarpa] >gi|222849528|gb|EEE87075.1| predicted protein [Populus trichocarpa]	gi|359475366|ref|XM_002282231.2|	424	1e-115	PREDICTED: Vitis vinifera methylcrotonoyl-CoA carboxylase beta chain, mitochondrial-like (LOC100253805), mRNA	sp|Q9LDD8|MCCB_ARATH	570	0	Methylcrotonoyl-CoA carboxylase beta chain, mitochondrial OS=Arabidopsis thaliana GN=MCCB PE=2 SV=1	PA2014	441	4e-174	COG4799	Acetyl-CoA carboxylase, carboxyltransferase component (subunits alpha and beta)	K01969	0	574	pop:POPTR_557395	3-methylcrotonyl-CoA carboxylase beta subunit [EC:6.4.1.4]	GO:0009616//virus induced gene silencing;GO:0010050//vegetative phase change;GO:0006552//leucine catabolic process	GO:0004658//propionyl-CoA carboxylase activity;GO:0008270//zinc ion binding;GO:0050897//cobalt ion binding;GO:0004075//biotin carboxylase activity;GO:0004485//methylcrotonoyl-CoA carboxylase activity	GO:0005759//mitochondrial matrix
Unigene25567_All	1551	11.5787	12.8924	8.4558	gi|255570248|ref|XP_002526084.1|	221.5	2e-56	hypothetical protein RCOM_0524510 [Ricinus communis] >gi|223534581|gb|EEF36278.1| hypothetical protein RCOM_0524510 [Ricinus communis]	gi|152031515|gb|EF988090.1|	77.8	3e-11	Oenothera biennis clone Oenbi39tri4 microsatellite CTT16 sequence	sp|Q9LIB3|BAG8_ARATH	140	3e-33	BAG family molecular chaperone regulator 8, chloroplastic OS=Arabidopsis thaliana GN=BAG1 PE=1 SV=1	--	--	--	--	--	K01115	5e-12	70.9	vcn:VOLCADRAFT_99471	phospholipase D [EC:3.1.4.4]	-	-	GO:0044464//cell part
Unigene25777_All	1088	6.0576	5.5259	4.4171	gi|225435806|ref|XP_002285757.1|	370.2	2e-101	PREDICTED: uncharacterized protein LOC100265613 [Vitis vinifera]	gi|359478474|ref|XM_002285721.2|	272	7e-70	PREDICTED: Vitis vinifera uncharacterized LOC100265613 (LOC100265613), mRNA	--	--	--	--	--	--	--	--	--	--	--	--	--	--	GO:0010103//stomatal complex morphogenesis;GO:0016226//iron-sulfur cluster assembly;GO:0006353//DNA-dependent transcription, termination;GO:0042793//transcription from plastid promoter;GO:0045893//positive regulation of transcription, DNA-dependent;GO:0009073//aromatic amino acid family biosynthetic process	GO:0003723//RNA binding	GO:0005739//mitochondrion;GO:0009507//chloroplast
Unigene25838_All	1340	2.1786	8.7075	24.971	gi|225432004|ref|XP_002279385.1|	318.2	1e-85	PREDICTED: probable WRKY transcription factor 48 [Vitis vinifera] >gi|296083226|emb|CBI22862.3| unnamed protein product [Vitis vinifera]	gi|383282327|gb|JQ081266.1|	188	1e-44	Gossypium hirsutum WRKY5 transcription factor (WRKY5) mRNA, complete cds	sp|Q9FGZ4|WRK48_ARATH	249	3e-66	Probable WRKY transcription factor 48 OS=Arabidopsis thaliana GN=WRKY48 PE=2 SV=1	--	--	--	--	--	K13424	3e-29	127	vvi:100243352	WRKY transcription factor 33	GO:0042742//defense response to bacterium;GO:0010200//response to chitin;GO:0045893//positive regulation of transcription, DNA-dependent;GO:0006865//amino acid transport	GO:0003677//DNA binding	GO:0005634//nucleus
Unigene25879_All	825	1.7157	1.8894	1.361	gi|255542808|ref|XP_002512467.1|	41.6	2e-10	conserved hypothetical protein [Ricinus communis] >gi|223548428|gb|EEF49919.1| conserved hypothetical protein [Ricinus communis]	--	--	--	--	sp|O80494|P2B15_ARATH	46.6	3e-07	F-box protein PP2-B15 OS=Arabidopsis thaliana GN=PP2B15 PE=2 SV=2	--	--	--	--	--	--	--	--	--	--	-	-	-
Unigene25939_All	785	3.2682	2.9501	1.8309	gi|356522196|ref|XP_003529733.1|	391.7	5e-108	PREDICTED: protein HOTHEAD-like [Glycine max]	gi|356550435|ref|XM_003543545.1|	65.9	6e-08	PREDICTED: Glycine max protein HOTHEAD-like (LOC100784433), mRNA	sp|Q9S746|HTH_ARATH	381	2e-106	Protein HOTHEAD OS=Arabidopsis thaliana GN=HTH PE=1 SV=1	SMa1414	85.5	9e-17	COG2303	Choline dehydrogenase and related flavoproteins	K15403	6e-109	391	vvi:100246317	fatty acid omega-hydroxy dehydrogenase [EC:1.1.-.-]	GO:0006066//alcohol metabolic process;GO:0009553//embryo sac development;GO:0007267//cell-cell signaling;GO:0010430//fatty acid omega-oxidation	GO:0050660//flavin adenine dinucleotide binding;GO:0008812//choline dehydrogenase activity;GO:0046593//mandelonitrile lyase activity	GO:0016023//cytoplasmic membrane-bounded vesicle;GO:0005576//extracellular region
Unigene26018_All	592	1.8679	3.0843	2.0485	gi|224095855|ref|XP_002310495.1|	238.8	3e-62	predicted protein [Populus trichocarpa] >gi|222853398|gb|EEE90945.1| predicted protein [Populus trichocarpa]	gi|157743417|gb|AC211301.1|	101	8e-19	Populus trichocarpa clone ACSB2137-O19, complete sequence	sp|Q9FMF5|RPT3_ARATH	206	1e-53	Root phototropism protein 3 OS=Arabidopsis thaliana GN=RPT3 PE=1 SV=2	--	--	--	--	--	--	--	--	--	--	GO:0009825//multidimensional cell growth;GO:0046777//protein autophosphorylation;GO:0009785//blue light signaling pathway;GO:0048767//root hair elongation;GO:0009638//phototropism;GO:0000271//polysaccharide biosynthetic process;GO:0009932//cell tip growth;GO:0043481//anthocyanin accumulation in tissues in response to UV light;GO:0010155//regulation of proton transport;GO:0010817//regulation of ho…	GO:0004871//signal transducer activity;GO:0005515//protein binding	GO:0005634//nucleus;GO:0005886//plasma membrane
Unigene26047_All	1699	25.0713	20.367	23.5278	gi|224066701|ref|XP_002302182.1|	662.5	0	predicted protein [Populus trichocarpa] >gi|222843908|gb|EEE81455.1| predicted protein [Populus trichocarpa]	gi|359493108|ref|XM_002268989.2|	359	6e-96	PREDICTED: Vitis vinifera exocyst complex component 2-like (LOC100241808), mRNA	sp|Q8S3U9|EXOC2_ARATH	601	5e-172	Exocyst complex component 2 OS=Arabidopsis thaliana GN=SEC5A PE=1 SV=1	--	--	--	--	--	--	--	--	--	--	GO:0010090//trichome morphogenesis;GO:0071555//cell wall organization;GO:0007155//cell adhesion;GO:0009860//pollen tube growth;GO:0048765//root hair cell differentiation;GO:0045010//actin nucleation;GO:0009846//pollen germination	-	GO:0005829//cytosol;GO:0009506//plasmodesma;GO:0005794//Golgi apparatus;GO:0005886//plasma membrane
Unigene26048_All	448	3.8506	5.0698	2.4061	gi|224067206|ref|XP_002302408.1|	61.2	4e-09	predicted protein [Populus trichocarpa] >gi|222844134|gb|EEE81681.1| predicted protein [Populus trichocarpa]	--	--	--	--	--	--	--	--	--	--	--	--	--	--	--	--	--	--	-	-	-
Unigene26190_All	483	2.1063	1.6597	1.5808	--	--	--	--	--	--	--	--	--	--	--	--	--	--	--	--	--	--	--	--	--	--	-	-	-
Unigene26213_All	743	3.0362	2.8171	4.5942	gi|225432302|ref|XP_002273600.1|	294.3	1e-78	PREDICTED: alanyl-tRNA editing protein AlaX-L-like [Vitis vinifera]	gi|224107334|ref|XM_002314414.1|	65.9	5e-08	Populus trichocarpa predicted protein, mRNA	--	--	--	--	PH1969	65.1	1e-10	COG2872	Predicted metal-dependent hydrolases related to alanyl-tRNA synthetase HxxxH domain	--	--	--	--	--	GO:0006419//alanyl-tRNA aminoacylation	GO:0004813//alanine-tRNA ligase activity;GO:0003676//nucleic acid binding;GO:0005524//ATP binding	GO:0005737//cytoplasm
Unigene26333_All	417	1.485	1.4952	1.0771	gi|356572112|ref|XP_003554214.1|	64.3	5e-10	PREDICTED: uncharacterized protein LOC100810028 [Glycine max]	--	--	--	--	--	--	--	--	--	--	--	--	--	--	--	--	--	--	-	-	-
Unigene26339_All	749	4.8426	4.4	4.7973	--	--	--	--	--	--	--	--	--	--	--	--	--	--	--	--	--	--	--	--	--	--	-	-	-
Unigene26667_All	1624	36.3886	29.9457	29.2883	gi|225435925|ref|XP_002267920.1|	712.2	0	PREDICTED: cysteine desulfurase 2, chloroplastic [Vitis vinifera] >gi|296083920|emb|CBI24308.3| unnamed protein product [Vitis vinifera]	gi|225435924|ref|XM_002267884.1|	416	1e-113	PREDICTED: Vitis vinifera cysteine desulfurase 2, chloroplastic-like (LOC100246217), mRNA	sp|Q93WX6|NFS2_ARATH	705	0	Cysteine desulfurase 2, chloroplastic OS=Arabidopsis thaliana GN=NFS2 PE=1 SV=1	alr2495	531	2e-150	COG0520	Selenocysteine lyase	K11717	0	712	vvi:100246217	cysteine desulfurase / selenocysteine lyase [EC:2.8.1.7 4.4.1.16]	GO:0018283//iron incorporation into metallo-sulfur cluster;GO:0000302//response to reactive oxygen species;GO:0010039//response to iron ion;GO:0001887//selenium compound metabolic process;GO:0055072//iron ion homeostasis;GO:0010269//response to selenium ion;GO:0006534//cysteine metabolic process;GO:0009073//aromatic amino acid family biosynthetic process	GO:0008483//transaminase activity;GO:0031071//cysteine desulfurase activity;GO:0009000//selenocysteine lyase activity;GO:0030170//pyridoxal phosphate binding	GO:0009507//chloroplast
Unigene26764_All	273	6.319	4.8939	3.9485	gi|255542530|ref|XP_002512328.1|	133.7	7e-31	phosphoglycerate mutase, putative [Ricinus communis] >gi|223548289|gb|EEF49780.1| phosphoglycerate mutase, putative [Ricinus communis]	gi|353523878|gb|AC246015.4|	99.6	1e-18	Solanum lycopersicum strain Heinz 1706 chromosome 1 clone sle-51f6 map 1, complete sequence	--	--	--	--	--	--	--	--	--	--	--	--	--	--	GO:0008152//metabolic process	GO:0003824//catalytic activity	GO:0005739//mitochondrion;GO:0005634//nucleus
Unigene26767_All	1254	11.8519	30.0804	26.5044	gi|148595726|emb|CAM12542.1|	236.9	4e-61	YA4 [Antirrhinum majus]	gi|356552339|ref|XM_003544478.1|	182	6e-43	PREDICTED: Glycine max nuclear transcription factor Y subunit A-9-like, transcript variant 2 (LOC100815617), mRNA	sp|Q9LXV5|NFYA1_ARATH	179	2e-45	Nuclear transcription factor Y subunit A-1 OS=Arabidopsis thaliana GN=NFYA1 PE=2 SV=1	YGL237c	88.2	3e-17	COG5224	CCAAT-binding factor, subunit B	K08064	1e-39	162	gmx:100782085	nuclear transcription factor Y, alpha	GO:0048510//regulation of timing of transition from vegetative to reproductive phase	GO:0003700//sequence-specific DNA binding transcription factor activity	GO:0005634//nucleus
Unigene27099_All	249	3.7305	1.0731	1.443	--	--	--	--	gi|123647333|emb|AM439926.1|	60	1e-06	Vitis vinifera, whole genome shotgun sequence, contig VV78X084334.9, clone ENTAV 115	--	--	--	--	--	--	--	--	--	--	--	--	--	--	-	-	-
Unigene27509_All	1114	50.5461	40.5769	27.6582	gi|1350984|sp|P49198.2|RS3A_HELAN	495.4	6e-139	RecName: Full=40S ribosomal protein S3a >gi|469248|gb|AAA80978.1| ribosomal protein S3a [Helianthus annuus]	gi|469247|gb|L31645.1|HNNSPSP	858	0	Helianthus annuus ribosomal protein S3a mRNA, complete cds	sp|P49198|RS3A_HELAN	495	2e-140	40S ribosomal protein S3a OS=Helianthus annuus GN=RPS3A PE=2 SV=2	SPAC13G6.02c	333	3e-91	COG1890	Ribosomal protein S3AE	K02984	4e-134	476	gmx:100805519	small subunit ribosomal protein S3Ae	GO:0006412//translation	GO:0003735//structural constituent of ribosome	GO:0005730//nucleolus;GO:0022626//cytosolic ribosome;GO:0005886//plasma membrane;GO:0005618//cell wall;GO:0009507//chloroplast
Unigene27592_All	1037	109.281	89.6706	72.8937	gi|114682|sp|P22778.1|ATPO_IPOBA	315.5	8e-85	RecName: Full=ATP synthase subunit O, mitochondrial; AltName: Full=Oligomycin sensitivity conferral protein; Short=OSCP; Flags: Precursor >gi|168270|gb|AAA33388.1| F-1-ATPase delta subunit precursor (EC 3.6.1.3) [Ipomoea batatas]	gi|168269|gb|J05397.1|IPBFATPD	117	2e-23	Sweet potato F-1-ATPase (mitochondrial type) delta subunit mRNA, complete cds	sp|P22778|ATPO_IPOBA	315	3e-86	ATP synthase subunit O, mitochondrial OS=Ipomoea batatas PE=1 SV=1	YDR298c	106	6e-23	COG0712	F0F1-type ATP synthase, delta subunit (mitochondrial oligomycin sensitivity protein)	K02137	2e-84	310	vvi:100241422	F-type H+-transporting ATPase oligomycin sensitivity conferral protein [EC:3.6.3.14]	GO:0042777//plasma membrane ATP synthesis coupled proton transport	GO:0046933//hydrogen ion transporting ATP synthase activity, rotational mechanism;GO:0008270//zinc ion binding;GO:0050897//cobalt ion binding	GO:0005754//mitochondrial proton-transporting ATP synthase, catalytic core;GO:0009507//chloroplast;GO:0005886//plasma membrane
Unigene27616_All	460	6.6349	8.2292	9.2758	gi|296085985|emb|CBI31426.3|	238	3e-62	unnamed protein product [Vitis vinifera]	gi|356533948|ref|XM_003535472.1|	145	4e-32	PREDICTED: Glycine max U-box domain-containing protein 14-like (LOC100797201), mRNA	sp|Q8VZ40|PUB14_ARATH	211	2e-55	U-box domain-containing protein 14 OS=Arabidopsis thaliana GN=PUB14 PE=1 SV=1	--	--	--	--	--	K09561	3e-08	55.5	vcn:VOLCADRAFT_67840	STIP1 homology and U-box containing protein 1 [EC:6.3.2.19]	GO:0046777//protein autophosphorylation;GO:0016567//protein ubiquitination	GO:0019894//kinesin binding;GO:0004842//ubiquitin-protein ligase activity;GO:0070696//transmembrane receptor protein serine/threonine kinase binding	GO:0005871//kinesin complex;GO:0000151//ubiquitin ligase complex
Unigene28009_All	379	2.5676	0.47	0.474	--	--	--	--	--	--	--	--	--	--	--	--	--	--	--	--	--	--	--	--	--	--	-	-	-
Unigene2808_All	223	0.3967	0.5991	1.007	--	--	--	--	gi|40445401|gb|AC129224.2|	65.9	1e-08	Oryza sativa (japonica cultivar-group) chromosome 11 BAC clone OSJNBa0029P13, complete sequence	--	--	--	--	--	--	--	--	--	--	--	--	--	--	-	-	-
Unigene28344_All	237	1.3065	1.1275	1.5161	--	--	--	--	--	--	--	--	--	--	--	--	--	--	--	--	--	--	--	--	--	--	-	-	-
Unigene28723_All	291	1.064	1.6834	1.3891	--	--	--	--	--	--	--	--	--	--	--	--	--	--	--	--	--	--	--	--	--	--	-	-	-
Unigene28799_All	334	0.6622	1.2	2.6895	gi|358248390|ref|NP_001240129.1|	103.2	1e-21	uncharacterized protein LOC100775516 [Glycine max]	--	--	--	--	--	--	--	--	--	--	--	--	--	--	--	--	--	--	GO:0046686//response to cadmium ion;GO:0006979//response to oxidative stress	-	GO:0016607//nuclear speck
Unigene28955_All	1931	2.0387	1.1762	1.1397	gi|110289069|gb|AAP53710.2|	81.3	5e-14	transposon protein, putative, CACTA, En/Spm sub-class [Oryza sativa Japonica Group]	--	--	--	--	--	--	--	--	--	--	--	--	--	--	--	--	--	--	-	-	-
Unigene28958_All	1741	4.3191	2.865	2.9926	gi|226493997|ref|NP_001145122.1|	55.1	3e-06	uncharacterized protein LOC100278342 precursor [Zea mays]	--	--	--	--	--	--	--	--	--	--	--	--	--	--	--	--	--	--	-	-	-
Unigene29051_All	1407	18.1081	27.5058	37.1253	--	--	--	--	gi|323500674|gb|HQ222360.1|	61.9	2e-06	Helianthus annuus cultivar HA383 clone BAC P339N08, complete sequence	--	--	--	--	--	--	--	--	--	--	--	--	--	--	-	-	-
Unigene29052_All	1505	19.868	27.0167	35.4838	--	--	--	--	gi|323500674|gb|HQ222360.1|	61.9	2e-06	Helianthus annuus cultivar HA383 clone BAC P339N08, complete sequence	--	--	--	--	--	--	--	--	--	--	--	--	--	--	-	-	-
Unigene29067_All	10397	87.585	56.9437	55.0618	gi|357471543|ref|XP_003606056.1|	235.3	0	30S ribosomal protein S11 [Medicago truncatula] >gi|355507111|gb|AES88253.1| 30S ribosomal protein S11 [Medicago truncatula]	gi|88656961|gb|DQ383816.1|	11970	0	Lactuca sativa cultivar Salinas chloroplast, complete genome	sp|Q1KXS7|RPOA_HELAN	654	0	DNA-directed RNA polymerase subunit alpha OS=Helianthus annuus GN=rpoA PE=3 SV=2	alr3421	374	1e-102	COG1290	Cytochrome b subunit of the bc complex	K03040	6e-154	545	vvi:4025131	DNA-directed RNA polymerase subunit alpha [EC:2.7.7.6]	GO:0006351//transcription, DNA-dependent;GO:0006412//translation	GO:0003899//DNA-directed RNA polymerase activity;GO:0003677//DNA binding;GO:0003735//structural constituent of ribosome;GO:0046983//protein dimerization activity	GO:0005840//ribosome;GO:0009507//chloroplast
Unigene29107_All	2085	7.6798	4.9554	4.2437	gi|147856802|emb|CAN79178.1|	359.8	9e-98	hypothetical protein VITISV_016729 [Vitis vinifera]	gi|189162470|dbj|AP009693.1|	61.9	2e-06	Lotus japonicus genomic DNA, clone: LjT24M05, TM1610, complete sequence	sp|Q9SS80|U503A_ARATH	221	1e-57	UPF0503 protein At3g09070, chloroplastic OS=Arabidopsis thaliana GN=At3g09070 PE=1 SV=1	--	--	--	--	--	--	--	--	--	--	GO:0032502//developmental process;GO:0044707	-	GO:0044464//cell part
Unigene29126_All	3309	9.7315	6.3121	6.0537	gi|359475831|ref|XP_002282789.2|	1680.2	0	PREDICTED: uncharacterized protein LOC100259525 [Vitis vinifera] >gi|296082057|emb|CBI21062.3| unnamed protein product [Vitis vinifera]	gi|359475830|ref|XM_002282753.2|	1112	0	PREDICTED: Vitis vinifera uncharacterized LOC100259525 (LOC100259525), mRNA	sp|Q84WU2|UBP13_ARATH	89.4	1e-17	Ubiquitin carboxyl-terminal hydrolase 13 OS=Arabidopsis thaliana GN=UBP13 PE=1 SV=1	SPCC188.08c	55.5	6e-07	COG5077	Ubiquitin carboxyl-terminal hydrolase	K11838	8e-20	98.2	gmx:100781560	ubiquitin carboxyl-terminal hydrolase 7 [EC:3.1.2.15]	-	-	GO:0009507//chloroplast
Unigene29155_All	1578	1.6819	1.1853	1.2808	gi|359475496|ref|XP_002268899.2|	42.7	3e-98	PREDICTED: DNA repair protein REV1-like [Vitis vinifera]	gi|359475495|ref|XM_002268863.2|	97.6	3e-17	PREDICTED: Vitis vinifera DNA repair protein REV1-like (LOC100247553), mRNA	sp|A3EWL3|REV1_ARATH	172	4e-43	DNA repair protein REV1 OS=Arabidopsis thaliana GN=REV1 PE=2 SV=1	dinP	45.8	4e-21	COG0389	Nucleotidyltransferase/DNA polymerase involved in DNA repair	K03515	3e-99	206	vvi:100247553	DNA repair protein REV1 [EC:2.7.7.-]	GO:0048731;GO:0044260;GO:0006974//response to DNA damage stimulus;GO:0010224//response to UV-B;GO:0044238//primary metabolic process;GO:0016043//cellular component organization;GO:0044249//cellular biosynthetic process	GO:0003887//DNA-directed DNA polymerase activity;GO:0005488//binding	GO:0043231//intracellular membrane-bounded organelle;GO:0044444//cytoplasmic part
Unigene29156_All	553	1.1998	0.8859	0.4061	gi|359475496|ref|XP_002268899.2|	50.4	1e-22	PREDICTED: DNA repair protein REV1-like [Vitis vinifera]	gi|359475495|ref|XM_002268863.2|	75.8	4e-11	PREDICTED: Vitis vinifera DNA repair protein REV1-like (LOC100247553), mRNA	sp|A3EWL3|REV1_ARATH	67	6e-12	DNA repair protein REV1 OS=Arabidopsis thaliana GN=REV1 PE=2 SV=1	STM0313	36.2	1e-06	COG0389	Nucleotidyltransferase/DNA polymerase involved in DNA repair	K03515	1e-23	77.4	vvi:100247553	DNA repair protein REV1 [EC:2.7.7.-]	GO:0006281//DNA repair;GO:0010224//response to UV-B;GO:0006261//DNA-dependent DNA replication	GO:0003684//damaged DNA binding;GO:0003887//DNA-directed DNA polymerase activity;GO:0016874//ligase activity;GO:0000287//magnesium ion binding	GO:0009536//plastid
Unigene29157_All	594	0.5213	0.2999	0.6805	gi|2660674|gb|AAC79145.1|	60.8	1e-22	hypothetical protein [Arabidopsis thaliana] >gi|9758379|dbj|BAB08828.1| unnamed protein product [Arabidopsis thaliana]	gi|359475495|ref|XM_002268863.2|	75.8	4e-11	PREDICTED: Vitis vinifera DNA repair protein REV1-like (LOC100247553), mRNA	sp|A3EWL3|REV1_ARATH	68.2	3e-12	DNA repair protein REV1 OS=Arabidopsis thaliana GN=REV1 PE=2 SV=1	STM0313	36.2	1e-06	COG0389	Nucleotidyltransferase/DNA polymerase involved in DNA repair	K03515	1e-17	62.8	ppp:PHYPADRAFT_171090	DNA repair protein REV1 [EC:2.7.7.-]	GO:0044249//cellular biosynthetic process;GO:0006281//DNA repair;GO:0010224//response to UV-B	GO:0003684//damaged DNA binding;GO:0003887//DNA-directed DNA polymerase activity;GO:0016874//ligase activity;GO:0000287//magnesium ion binding	GO:0005737//cytoplasm
Unigene29229_All	271	1.9586	2.3007	1.3259	--	--	--	--	--	--	--	--	--	--	--	--	--	--	--	--	--	--	--	--	--	--	-	-	-
Unigene2925_All	284	1.4017	0.7841	0.3163	--	--	--	--	--	--	--	--	--	--	--	--	--	--	--	--	--	--	--	--	--	--	-	-	-
Unigene29362_All	808	2.8467	1.6535	1.2229	gi|359476440|ref|XP_002270936.2|	118.2	1e-25	PREDICTED: glutamate receptor 2.7-like [Vitis vinifera]	--	--	--	--	sp|Q7XP59|GLR31_ORYSJ	104	5e-23	Glutamate receptor 3.1 OS=Oryza sativa subsp. japonica GN=GLR3.1 PE=1 SV=1	--	--	--	--	--	K05387	6e-23	105	aly:ARALYDRAFT_660967	glutamate receptor, ionotropic, other eukaryote	-	GO:0005215//transporter activity	GO:0044464//cell part
Unigene29457_All	2155	37.0899	38.9136	53.2927	--	--	--	--	--	--	--	--	--	--	--	--	--	--	--	--	--	--	--	--	--	--	-	-	-
Unigene29489_All	350	3.2859	1.2724	2.8232	gi|255683546|gb|ACU27362.1|	98.6	2e-20	superman [Nicotiana tabacum]	gi|357492354|ref|XM_003616418.1|	111	4e-22	Medicago truncatula Ramosa1 C2H2 zinc-finger transcription factor (MTR_5g080660) mRNA, complete cds	sp|Q38895|SUP_ARATH	88.2	1e-18	Transcriptional regulator SUPERMAN OS=Arabidopsis thaliana GN=SUP PE=1 SV=1	--	--	--	--	--	--	--	--	--	--	GO:0010160//formation of organ boundary;GO:0048440//carpel development;GO:0008361//regulation of cell size;GO:0009755//hormone-mediated signaling pathway;GO:0042127//regulation of cell proliferation;GO:0010093//specification of floral organ identity;GO:0045892//negative regulation of transcription, DNA-dependent	GO:0008270//zinc ion binding;GO:0003677//DNA binding;GO:0003700//sequence-specific DNA binding transcription factor activity	GO:0005634//nucleus
Unigene29536_All	1288	9.7875	6.6733	5.8235	gi|147780316|emb|CAN76967.1|	325.5	1e-87	hypothetical protein VITISV_018330 [Vitis vinifera]	gi|356502312|ref|XM_003519916.1|	71.9	1e-09	PREDICTED: Glycine max uncharacterized protein LOC100794231 (LOC100794231), mRNA	sp|Q84Y18|CXIP4_ARATH	50.8	2e-06	CAX-interacting protein 4 OS=Arabidopsis thaliana GN=CXIP4 PE=1 SV=2	YDR170c	54.7	3e-07	COG5307	SEC7 domain proteins	K12821	3e-07	54.7	ppp:PHYPADRAFT_168393	pre-mRNA-processing factor 40	GO:0009220//pyrimidine ribonucleotide biosynthetic process	-	GO:0005739//mitochondrion
Unigene29611_All	640	4.4924	1.7396	2.5966	gi|224086074|ref|XP_002307805.1|	55.8	5e-07	predicted protein [Populus trichocarpa] >gi|222857254|gb|EEE94801.1| predicted protein [Populus trichocarpa]	--	--	--	--	--	--	--	--	--	--	--	--	--	K08852	5e-08	55.8	pop:POPTR_1079934	serine/threonine-protein kinase/endoribonuclease IRE1 [EC:2.7.11.1 3.1.26.-]	-	-	-
Unigene29644_All	2443	5.3413	11.3752	17.9804	gi|10998537|gb|AAG25966.1|AF302082_1	820.5	0	cytokinin-regulated kinase 1 [Nicotiana tabacum]	gi|359493413|ref|XM_002280028.2|	61.9	3e-06	PREDICTED: Vitis vinifera serine/threonine-protein kinase-like protein CCR4-like (LOC100246469), mRNA	sp|Q9FIJ6|ACCR4_ARATH	615	4e-176	Serine/threonine-protein kinase-like protein CCR4 OS=Arabidopsis thaliana GN=CCR4 PE=1 SV=1	YAR019c	87	1e-16	COG0515	Serine/threonine protein kinase	K00924	8e-85	313	osa:4333525	[EC:2.7.1.-]	GO:0009693//ethylene biosynthetic process;GO:0010200//response to chitin	GO:0004672//protein kinase activity;GO:0042803//protein homodimerization activity	GO:0044464//cell part
Unigene29663_All	452	4.6973	5.419	4.0741	gi|302838187|ref|XP_002950652.1|	61.2	5e-09	hypothetical protein VOLCADRAFT_117616 [Volvox carteri f. nagariensis] >gi|300264201|gb|EFJ48398.1| hypothetical protein VOLCADRAFT_117616 [Volvox carteri f. nagariensis]	gi|357146508|ref|XM_003573970.1|	65.9	3e-08	PREDICTED: Brachypodium distachyon WD repeat-containing protein 70-like (LOC100827594), mRNA	sp|Q9FHB0|Y5014_ARATH	62.4	1e-10	B3 domain-containing protein At5g60140 OS=Arabidopsis thaliana GN=At5g60140 PE=2 SV=2	YOR054c	68.2	5e-12	COG0452	Phosphopantothenoylcysteine synthetase/decarboxylase	K11323	7e-14	74.3	vcn:VOLCADRAFT_121342	histone arginine demethylase JMJD6 [EC:1.14.11.-]	-	GO:0005488//binding	-
Unigene30009_All	1853	10.9329	13.5551	10.4954	gi|255543997|ref|XP_002513061.1|	622.1	8e-177	Peptide transporter, putative [Ricinus communis] >gi|223548072|gb|EEF49564.1| Peptide transporter, putative [Ricinus communis]	gi|349708029|emb|FQ390376.1|	69.9	8e-09	Vitis vinifera clone SS0AEB17YO14	sp|Q9M1I2|PTR46_ARATH	562	2e-160	Probable peptide/nitrate transporter At3g54450 OS=Arabidopsis thaliana GN=At3g54450 PE=2 SV=1	ECU11g1050	115	3e-25	COG3104	Dipeptide/tripeptide permease	K14638	4e-124	443	ppp:PHYPADRAFT_134814	solute carrier family 15 (peptide/histidine transporter), member 3/4	GO:0006810//transport	-	GO:0005886//plasma membrane
Unigene30060_All	979	29.3681	33.4806	34.7753	gi|356536340|ref|XP_003536697.1|	404.1	1e-111	PREDICTED: vesicle-associated membrane protein 727-like [Glycine max]	gi|225464165|ref|XM_002269098.1|	230	2e-57	PREDICTED: Vitis vinifera vesicle-associated membrane protein 727-like, transcript variant 1 (LOC100243052), mRNA	sp|Q9M376|VA727_ARATH	392	1e-109	Vesicle-associated membrane protein 727 OS=Arabidopsis thaliana GN=VAMP727 PE=2 SV=1	YAL030w	65.1	2e-10	COG5143	Synaptobrevin/VAMP-like protein	K08511	9e-110	394	aly:ARALYDRAFT_906838	vesicle-associated membrane protein 72	GO:0006623//protein targeting to vacuole;GO:0016192//vesicle-mediated transport;GO:0007033//vacuole organization	-	GO:0005768//endosome;GO:0016023//cytoplasmic membrane-bounded vesicle;GO:0031201//SNARE complex;GO:0016021//integral to membrane
Unigene30076_All	1815	29.7323	13.9125	13.4372	gi|359475310|ref|XP_003631648.1|	708.4	0	PREDICTED: glucan endo-1,3-beta-glucosidase 7-like [Vitis vinifera] >gi|297741451|emb|CBI32582.3| unnamed protein product [Vitis vinifera]	gi|359475309|ref|XM_003631600.1|	109	1e-20	PREDICTED: Vitis vinifera glucan endo-1,3-beta-glucosidase 7-like (LOC100853320), mRNA	sp|Q9M069|E137_ARATH	622	2e-178	Glucan endo-1,3-beta-glucosidase 7 OS=Arabidopsis thaliana GN=At4g34480 PE=1 SV=2	DR1459	51.2	6e-06	COG1404	Subtilisin-like serine proteases	K14489	2e-10	65.9	vvi:100263145	arabidopsis histidine kinase 2/3/4 (cytokinin receptor) [EC:2.7.13.3]	GO:0005975//carbohydrate metabolic process	GO:0042973//glucan endo-1,3-beta-D-glucosidase activity;GO:0043169//cation binding	GO:0009507//chloroplast;GO:0005886//plasma membrane
Unigene30228_All	394	1.7963	4.9734	9.0057	gi|224106435|ref|XP_002314165.1|	81.3	4e-15	predicted protein [Populus trichocarpa] >gi|222850573|gb|EEE88120.1| predicted protein [Populus trichocarpa]	--	--	--	--	--	--	--	--	--	--	--	--	--	--	--	--	--	--	-	-	-
Unigene30444_All	848	2.5559	1.1029	1.2712	gi|147845507|emb|CAN80599.1|	195.3	9e-49	hypothetical protein VITISV_016761 [Vitis vinifera]	--	--	--	--	--	--	--	--	--	--	--	--	--	--	--	--	--	--	-	-	-
Unigene31007_All	613	34.275	32.3294	106.094	gi|38564725|gb|AAR23802.1|	55.5	6e-07	hypothetical protein, partial [Helianthus annuus]	--	--	--	--	--	--	--	--	--	--	--	--	--	--	--	--	--	--	-	-	-
Unigene31034_All	869	43.9274	30.3389	27.7549	gi|359490767|ref|XP_003634163.1|	299.7	3e-80	PREDICTED: nascent polypeptide-associated complex subunit alpha-like protein 2-like [Vitis vinifera] >gi|302143993|emb|CBI23098.3| unnamed protein product [Vitis vinifera]	gi|356509140|ref|XM_003523262.1|	285	4e-74	PREDICTED: Glycine max nascent polypeptide-associated complex subunit alpha-like protein 2-like (LOC100780632), mRNA	sp|Q94JX9|NACA2_ARATH	267	5e-72	Nascent polypeptide-associated complex subunit alpha-like protein 2 OS=Arabidopsis thaliana GN=At3g49470 PE=2 SV=2	SPBC25H2.05	110	2e-24	COG1308	Transcription factor homologous to NACalpha-BTF3	K03626	3e-81	299	vvi:100854239	nascent polypeptide-associated complex subunit alpha	-	GO:0005388//calcium-transporting ATPase activity	GO:0005634//nucleus;GO:0005829//cytosol
Unigene31451_All	618	12.096	6.7739	5.6688	gi|302399059|gb|ADL36824.1|	129.8	2e-29	SPL domain class transcription factor [Malus x domestica]	gi|225425367|ref|XM_002270190.1|	60	3e-06	PREDICTED: Vitis vinifera squamosa promoter-binding-like protein 16 (LOC100243827), mRNA	sp|Q6YZE8|SPL16_ORYSJ	94.4	5e-20	Squamosa promoter-binding-like protein 16 OS=Oryza sativa subsp. japonica GN=SPL16 PE=2 SV=1	--	--	--	--	--	--	--	--	--	--	-	-	-
Unigene31458_All	790	33.3706	106.77	151.173	gi|356529221|ref|XP_003533194.1|	100.9	2e-20	PREDICTED: uncharacterized protein LOC547559 [Glycine max]	gi|123706400|emb|AM466181.1|	73.8	2e-10	Vitis vinifera contig VV78X065033.6, whole genome shotgun sequence	sp|Q04980|LTI65_ARATH	83.6	1e-16	Low-temperature-induced 65 kDa protein OS=Arabidopsis thaliana GN=LTI65 PE=2 SV=2	--	--	--	--	--	K03138	9e-06	48.9	gmx:100813730	transcription initiation factor TFIIF subunit alpha	GO:0050896//response to stimulus	-	-
Unigene31553_All	209	1.2698	0.8523	2.3639	--	--	--	--	--	--	--	--	--	--	--	--	--	--	--	--	--	--	--	--	--	--	-	-	-
Unigene31625_All	317	5.0233	2.3883	3.6838	--	--	--	--	--	--	--	--	--	--	--	--	--	--	--	--	--	--	--	--	--	--	-	-	-
Unigene31719_All	279	1.7439	1.9155	0.322	gi|312282667|dbj|BAJ34199.1|	60.1	1e-08	unnamed protein product [Thellungiella halophila]	--	--	--	--	--	--	--	--	--	--	--	--	--	--	--	--	--	--	-	-	-
Unigene31853_All	280	0.9478	1.4315	0.802	--	--	--	--	--	--	--	--	--	--	--	--	--	--	--	--	--	--	--	--	--	--	-	-	-
Unigene32042_All	471	18.8764	12.7647	16.6879	gi|224063721|ref|XP_002301271.1|	94.4	6e-19	predicted protein [Populus trichocarpa] >gi|222842997|gb|EEE80544.1| predicted protein [Populus trichocarpa]	--	--	--	--	--	--	--	--	--	--	--	--	--	--	--	--	--	--	-	-	GO:0005856//cytoskeleton;GO:0005777//peroxisome
Unigene3238_All	446	2.4794	3.4949	3.5247	gi|297727213|ref|NP_001175970.1|	58.5	3e-08	Os09g0549450 [Oryza sativa Japonica Group] >gi|255679114|dbj|BAH94698.1| Os09g0549450 [Oryza sativa Japonica Group]	--	--	--	--	sp|Q5NB82|NLP3_ORYSJ	48.9	1e-06	Protein NLP3 OS=Oryza sativa subsp. japonica GN=NLP3 PE=3 SV=1	--	--	--	--	--	--	--	--	--	--	-	-	-
Unigene32630_All	1296	6.2117	6.0823	6.9659	gi|359492445|ref|XP_002284140.2|	176.4	8e-43	PREDICTED: uncharacterized protein LOC100248904 [Vitis vinifera]	gi|66351035|emb|AJ854072.1|	77.8	2e-11	Ficus montana microsatellite DNA, clone WFM4-15	sp|Q9LME6|MBD8_ARATH	119	3e-27	Methyl-CpG-binding domain-containing protein 8 OS=Arabidopsis thaliana GN=MBD8 PE=2 SV=1	PA1297	50.1	9e-06	COG1230	Co/Zn/Cd efflux system component	K01051	2e-08	58.5	gmx:100776781	pectinesterase [EC:3.1.1.11]	-	GO:0005488//binding	GO:0005622//intracellular
Unigene32715_All	2084	2.8017	9.3813	2.9311	gi|154816299|gb|ABS87383.1|	1124.4	0	minichromosome maintenance factor [Lactuca sativa]	gi|225425317|ref|XM_002273639.1|	920	0	PREDICTED: Vitis vinifera DNA replication licensing factor mcm2-like (LOC100266163), mRNA	sp|P43299|PROL_ARATH	264	1e-70	Protein PROLIFERA OS=Arabidopsis thaliana GN=PRL PE=1 SV=2	SPBC4.04c	611	1e-174	COG1241	Predicted ATPase involved in replication control, Cdc46/Mcm family	K02540	0	1112	vvi:100266163	minichromosome maintenance protein 2	GO:0042127//regulation of cell proliferation;GO:0006275//regulation of DNA replication;GO:0000911//cytokinesis by cell plate formation;GO:0051567//histone H3-K9 methylation;GO:0006268//DNA unwinding involved in replication;GO:0010082//regulation of root meristem growth;GO:0006084//acetyl-CoA metabolic process;GO:0006306//DNA methylation;GO:0051726//regulation of cell cycle;GO:0009790//embryo deve…	GO:0008094//DNA-dependent ATPase activity;GO:0003677//DNA binding;GO:0005524//ATP binding	GO:0005829//cytosol;GO:0005634//nucleus
Unigene32722_All	1906	3.4579	3.388	3.1341	gi|225470798|ref|XP_002263001.1|	58.5	4e-07	PREDICTED: leucine-rich repeat receptor-like serine/threonine-protein kinase At1g17230-like [Vitis vinifera]	gi|225470797|ref|XM_002262965.1|	119	1e-23	PREDICTED: Vitis vinifera leucine-rich repeat receptor-like serine/threonine-protein kinase At1g17230-like (LOC100264502), mRNA	sp|Q9SHI2|Y1723_ARATH	738	0	Leucine-rich repeat receptor-like serine/threonine-protein kinase At1g17230 OS=Arabidopsis thaliana GN=At1g17230 PE=2 SV=2	YAR019c	99	3e-20	COG0515	Serine/threonine protein kinase	K00924	2e-103	374	ath:AT1G75820	[EC:2.7.1.-]	GO:0010103//stomatal complex morphogenesis;GO:0006468//protein phosphorylation;GO:0007165//signal transduction;GO:0002237//response to molecule of bacterial origin;GO:0048443//stamen development	GO:0004674//protein serine/threonine kinase activity;GO:0005524//ATP binding	GO:0016023//cytoplasmic membrane-bounded vesicle;GO:0016021//integral to membrane;GO:0005576//extracellular region
Unigene32748_All	260	1.1909	1.5416	1.5547	gi|37781226|gb|AAP44390.1|	36.6	3e-17	nematode resistance protein [Solanum tuberosum]	--	--	--	--	sp|Q40392|TMVRN_NICGU	58.9	7e-10	TMV resistance protein N OS=Nicotiana glutinosa GN=N PE=1 SV=1	--	--	--	--	--	--	--	--	--	--	GO:0006952//defense response;GO:0007165//signal transduction	GO:0043531//ADP binding	GO:0005622//intracellular
Unigene32878_All	3458	34.2939	22.1257	29.8346	gi|225443952|ref|XP_002279808.1|	1263.1	0	PREDICTED: auxin response factor 6-like [Vitis vinifera]	gi|225443951|ref|XM_002279772.1|	670	0	PREDICTED: Vitis vinifera auxin response factor 6-like (LOC100242923), mRNA	sp|Q9ZTX8|ARFF_ARATH	1125	0	Auxin response factor 6 OS=Arabidopsis thaliana GN=ARF6 PE=1 SV=2	--	--	--	--	--	K14486	2e-180	631	vvi:100254074	auxin response factor	GO:0044699;GO:0009733//response to auxin stimulus;GO:0050794//regulation of cellular process;GO:0006351//transcription, DNA-dependent	GO:0005488//binding	-
Unigene32929_All	822	3.5515	2.7631	2.2949	gi|224065032|ref|XP_002301639.1|	320.1	2e-86	predicted protein [Populus trichocarpa] >gi|222843365|gb|EEE80912.1| predicted protein [Populus trichocarpa]	gi|623583|gb|L29272.1|TOBNTRAE	145	8e-32	Nicotiana tabacum SR1 Nt-rab11e mRNA, 3' end	sp|P28187|RAA5C_ARATH	316	9e-87	Ras-related protein RABA5c OS=Arabidopsis thaliana GN=RABA5C PE=1 SV=1	YER031c	223	3e-58	COG1100	GTPase SAR1 and related small G proteins	K07976	2e-86	317	aly:ARALYDRAFT_903694	Rab family, other	GO:0007264//small GTPase mediated signal transduction;GO:0006913//nucleocytoplasmic transport;GO:0009408//response to heat;GO:0006184//GTP catabolic process;GO:0006886//intracellular protein transport;GO:0048219//inter-Golgi cisterna vesicle-mediated transport	GO:0003924//GTPase activity;GO:0005525//GTP binding	GO:0005829//cytosol;GO:0005795//Golgi stack;GO:0005802//trans-Golgi network;GO:0005798//Golgi-associated vesicle;GO:0005886//plasma membrane
Unigene32991_All	1234	30.0023	30.3153	31.0105	gi|147816495|emb|CAN77350.1|	466.1	4e-130	hypothetical protein VITISV_007542 [Vitis vinifera]	gi|330318797|gb|HM003367.1|	398	1e-108	Camellia sinensis clone U10BcDNA 0852 pre-mRNA-splicing factor syf2 mRNA, partial cds	--	--	--	--	--	--	--	--	--	K12868	1e-129	461	vvi:100252114	pre-mRNA-splicing factor SYF2	-	-	GO:0009536//plastid
Unigene33000_All	742	5.7228	5.7019	5.1452	--	--	--	--	gi|332002898|gb|CP002688.1|	61.9	8e-07	Arabidopsis thaliana chromosome 5, complete sequence	--	--	--	--	--	--	--	--	--	--	--	--	--	--	-	-	-
Unigene33249_All	881	5.6232	2.022	1.8863	--	--	--	--	--	--	--	--	--	--	--	--	--	--	--	--	--	--	--	--	--	--	-	-	-
Unigene33371_All	471	1.4087	0.9455	0.9536	--	--	--	--	gi|302702022|gb|HM438977.1|	58	8e-06	Curcuma longa clone 28 microsatellite sequence	--	--	--	--	--	--	--	--	--	--	--	--	--	--	-	-	-
Unigene33669_All	1516	29.1773	29.3177	31.0193	gi|225432504|ref|XP_002279548.1|	605.1	8e-172	PREDICTED: BTB/POZ and MATH domain-containing protein 2 isoform 1 [Vitis vinifera] >gi|297736968|emb|CBI26169.3| unnamed protein product [Vitis vinifera]	gi|225312692|dbj|AK320035.1|	127	3e-26	Solanum lycopersicum cDNA, clone: LEFL1004BD12, HTC in leaf	sp|Q9M8J9|BPM2_ARATH	547	5e-156	BTB/POZ and MATH domain-containing protein 2 OS=Arabidopsis thaliana GN=BPM2 PE=1 SV=1	--	--	--	--	--	K10523	8e-173	605	vvi:100240933	speckle-type POZ protein	GO:0042631//cellular response to water deprivation;GO:0071472//cellular response to salt stress	-	GO:0005634//nucleus
Unigene33774_All	388	2.508	1.6069	2.5467	gi|225426387|ref|XP_002269706.1|	170.2	7e-42	PREDICTED: probable serine racemase [Vitis vinifera] >gi|297742536|emb|CBI34685.3| unnamed protein product [Vitis vinifera]	gi|225426386|ref|XM_002269670.1|	127	8e-27	PREDICTED: Vitis vinifera probable serine racemase-like (LOC100247899), mRNA	--	--	--	--	all0262	77.8	4e-15	COG1171	Threonine dehydratase	K12235	6e-43	170	vvi:100247899	serine racemase [EC:5.1.1.18]	GO:0009069//serine family amino acid metabolic process	GO:0030170//pyridoxal phosphate binding;GO:0030378//serine racemase activity;GO:0004794//L-threonine ammonia-lyase activity	-
Unigene33904_All	600	2.1379	3.8597	1.4223	gi|18076738|emb|CAC84276.1|	375.9	1e-103	HD-Zip protein [Zinnia violacea]	gi|38198210|dbj|AB109562.1|	646	0	Zinnia elegans ZeHB-13 mRNA for homeobox leucine-zipper protein, complete cds	sp|Q9ZU11|ATB15_ARATH	359	7e-100	Homeobox-leucine zipper protein ATHB-15 OS=Arabidopsis thaliana GN=ATHB-15 PE=1 SV=1	--	--	--	--	--	K09338	6e-101	364	aly:ARALYDRAFT_314555	homeobox-leucine zipper protein	GO:0006355//regulation of transcription, DNA-dependent	GO:0003700//sequence-specific DNA binding transcription factor activity;GO:0043565//sequence-specific DNA binding	GO:0005634//nucleus
Unigene34068_All	1485	38.1862	43.4251	50.2375	gi|225429321|ref|XP_002271502.1|	439.5	6e-122	PREDICTED: uncharacterized protein LOC100267925 [Vitis vinifera] >gi|296083095|emb|CBI22499.3| unnamed protein product [Vitis vinifera]	gi|225320030|dbj|AK324400.1|	155	1e-34	Solanum lycopersicum cDNA, clone: LEFL1077BH07, HTC in leaf	--	--	--	--	--	--	--	--	--	--	--	--	--	--	GO:0015996//chlorophyll catabolic process	-	GO:0009507//chloroplast
Unigene34397_All	471	4.5078	4.444	3.9097	gi|356518627|ref|XP_003527980.1|	85.5	2e-16	PREDICTED: histone-lysine N-methyltransferase ATX4-like [Glycine max]	gi|238837237|gb|FJ434842.1|	61.9	5e-07	Karenia brevis clone KbrSL-like1 trans-spliced leader sequence SL-like genes, partial sequence	sp|Q8GZ42|ATX5_ARATH	84	4e-17	Histone-lysine N-methyltransferase ATX5 OS=Arabidopsis thaliana GN=ATX5 PE=2 SV=1	--	--	--	--	--	--	--	--	--	--	-	-	-
Unigene34506_All	894	2.276	0.9963	1.0048	gi|297803722|ref|XP_002869745.1|	79	1e-13	RWP-RK domain-containing protein [Arabidopsis lyrata subsp. lyrata] >gi|297315581|gb|EFH46004.1| RWP-RK domain-containing protein [Arabidopsis lyrata subsp. lyrata]	--	--	--	--	sp|Q84TH9|NLP7_ARATH	75.5	4e-14	Protein NLP7 OS=Arabidopsis thaliana GN=NLP7 PE=1 SV=2	--	--	--	--	--	--	--	--	--	--	GO:0010167//response to nitrate;GO:0009414//response to water deprivation;GO:0010118//stomatal movement;GO:0042128//nitrate assimilation	-	GO:0005634//nucleus
Unigene34730_All	583	20.03	14.5139	16.2554	gi|356505957|ref|XP_003521755.1|	125.6	4e-28	PREDICTED: uncharacterized protein LOC100797959 [Glycine max]	gi|4929304|gb|AF144708.1|AF144708	109	3e-21	Pisum sativum Tha4 protein (Tha4) mRNA, complete cds; nuclear gene for chloroplast product	--	--	--	--	asl0845	80.9	1e-15	COG1826	Sec-independent protein secretion pathway components	K03116	4e-29	125	gmx:100797959	sec-independent protein translocase protein TatA	GO:0015031//protein transport	-	GO:0009941//chloroplast envelope;GO:0009535//chloroplast thylakoid membrane
Unigene34934_All	1808	8.367	6.1087	5.9869	gi|224075980|ref|XP_002304857.1|	323.2	8e-87	predicted protein [Populus trichocarpa] >gi|222842289|gb|EEE79836.1| predicted protein [Populus trichocarpa]	gi|357508692|ref|XM_003624587.1|	61.9	2e-06	Medicago truncatula Ran-binding protein (MTR_7g085820) mRNA, complete cds	--	--	--	--	SPAC1B1.03c	50.4	1e-05	COG5215	Karyopherin (importin) beta	--	--	--	--	--	-	-	GO:0044464//cell part
Unigene34962_All	389	16.9426	16.9438	10.8533	--	--	--	--	gi|89039358|gb|DQ399087.1|	61.9	4e-07	Lolium multiflorum clone lm23 microsatellite sequence	--	--	--	--	--	--	--	--	--	--	--	--	--	--	-	-	-
Unigene34969_All	1332	50.177	36.8113	33.416	gi|356536435|ref|XP_003536743.1|	342.8	6e-93	PREDICTED: E3 ubiquitin-protein ligase CIP8-like isoform 1 [Glycine max] >gi|356536437|ref|XP_003536744.1| PREDICTED: E3 ubiquitin-protein ligase CIP8-like isoform 2 [Glycine max]	gi|359482779|ref|XM_002269341.2|	67.9	2e-08	PREDICTED: Vitis vinifera uncharacterized LOC100259959 (LOC100259959), mRNA	sp|Q9SPL2|CIP8_ARATH	282	3e-76	E3 ubiquitin-protein ligase CIP8 OS=Arabidopsis thaliana GN=CIP8 PE=1 SV=1	YKR072c	50.8	5e-06	COG0452	Phosphopantothenoylcysteine synthetase/decarboxylase	K11982	4e-29	127	ppp:PHYPADRAFT_169900	E3 ubiquitin-protein ligase RNF115/126 [EC:6.3.2.19]	GO:0016567//protein ubiquitination	GO:0046914//transition metal ion binding;GO:0005515//protein binding	GO:0005737//cytoplasm
Unigene35022_All	1697	0.2085	4.6975	0.6087	gi|147812439|emb|CAN65790.1|	698.4	0	hypothetical protein VITISV_042049 [Vitis vinifera]	gi|356535548|ref|XM_003536259.1|	61.9	2e-06	PREDICTED: Glycine max cytochrome P450 77A3-like (LOC100793522), mRNA	sp|P37124|C77A2_SOLME	679	0	Cytochrome P450 77A2 OS=Solanum melongena GN=CYP77A2 PE=2 SV=1	all3746	110	1e-23	COG2124	Cytochrome P450	K00517	0	696	vvi:100245465	[EC:1.14.-.-]	GO:0048868//pollen tube development;GO:0010048//vernalization response;GO:0009908//flower development;GO:0010143//cutin biosynthetic process;GO:0019395//fatty acid oxidation;GO:0009567//double fertilization forming a zygote and endosperm	GO:0016705//oxidoreductase activity, acting on paired donors, with incorporation or reduction of molecular oxygen;GO:0009055//electron carrier activity;GO:0019825//oxygen binding;GO:0020037//heme binding;GO:0005506//iron ion binding;GO:0052722//fatty acid in-chain hydroxylase activity	GO:0005739//mitochondrion;GO:0005576//extracellular region;GO:0009507//chloroplast
Unigene35106_All	488	51.3028	42.7095	45.3745	gi|225429940|ref|XP_002283869.1|	68.9	3e-11	PREDICTED: uncharacterized protein LOC100262893 [Vitis vinifera] >gi|296081849|emb|CBI20854.3| unnamed protein product [Vitis vinifera]	--	--	--	--	--	--	--	--	--	--	--	--	--	--	--	--	--	--	-	-	-
Unigene35128_All	318	1.8083	1.6806	1.8361	gi|297839009|ref|XP_002887386.1|	89.7	1e-17	hypothetical protein ARALYDRAFT_316144 [Arabidopsis lyrata subsp. lyrata] >gi|297333227|gb|EFH63645.1| hypothetical protein ARALYDRAFT_316144 [Arabidopsis lyrata subsp. lyrata]	--	--	--	--	--	--	--	--	--	--	--	--	--	--	--	--	--	--	-	-	-
Unigene35846_All	282	1.8822	4.5798	0.9556	gi|297799518|ref|XP_002867643.1|	104.8	3e-22	ATP binding protein [Arabidopsis lyrata subsp. lyrata] >gi|297313479|gb|EFH43902.1| ATP binding protein [Arabidopsis lyrata subsp. lyrata]	--	--	--	--	--	--	--	--	--	--	--	--	--	K08869	3e-23	104	aly:ARALYDRAFT_492357	aarF domain-containing kinase	GO:0010413//glucuronoxylan metabolic process;GO:0016556//mRNA modification;GO:0006468//protein phosphorylation;GO:0045492//xylan biosynthetic process	GO:0004672//protein kinase activity;GO:0005524//ATP binding	GO:0009507//chloroplast;GO:0005886//plasma membrane
Unigene35990_All	288	1.0751	1.5463	0.6238	--	--	--	--	--	--	--	--	--	--	--	--	--	--	--	--	--	--	--	--	--	--	-	-	-
Unigene35998_All	661	2.9444	0.2695	0.8154	gi|224086138|ref|XP_002307829.1|	71.2	1e-11	predicted protein [Populus trichocarpa] >gi|222857278|gb|EEE94825.1| predicted protein [Populus trichocarpa]	--	--	--	--	--	--	--	--	--	--	--	--	--	--	--	--	--	--	-	-	-
Unigene36058_All	686	4.3846	4.025	4.6486	--	--	--	--	--	--	--	--	--	--	--	--	--	--	--	--	--	--	--	--	--	--	-	-	-
Unigene36155_All	265	5.8421	8.2347	10.6777	gi|359488331|ref|XP_002277688.2|	93.6	8e-19	PREDICTED: receptor-like protein kinase FERONIA [Vitis vinifera]	--	--	--	--	sp|Q9LX66|HERK_ARATH	89	6e-19	Receptor-like protein kinase HERK 1 OS=Arabidopsis thaliana GN=HERK1 PE=1 SV=1	ML0016_1	52	3e-07	COG0515	Serine/threonine protein kinase	K13429	8e-20	93.2	ppp:PHYPADRAFT_1279	chitin elicitor receptor kinase 1	GO:0016310//phosphorylation;GO:0043170	GO:0004672//protein kinase activity;GO:0000166//nucleotide binding	-
Unigene36172_All	260	1.0208	0.5139	0.3455	--	--	--	--	gi|56693409|gb|AC142507.13|	58	4e-06	Medicago truncatula clone mth2-30h19, complete sequence	--	--	--	--	--	--	--	--	--	--	--	--	--	--	-	-	-
Unigene36433_All	1403	21.2494	17.6488	18.5035	gi|359482848|ref|XP_002280211.2|	572.8	4e-162	PREDICTED: nucleosome assembly protein 1-like 1-like isoform 1 [Vitis vinifera] >gi|297743095|emb|CBI35962.3| unnamed protein product [Vitis vinifera]	gi|359482847|ref|XM_002280175.2|	317	2e-83	PREDICTED: Vitis vinifera nucleosome assembly protein 1-like 1-like, transcript variant 1 (LOC100261732), mRNA	sp|Q0WMN5|Y3913_ARATH	61.2	1e-09	Uncharacterized protein At3g49140 OS=Arabidopsis thaliana GN=At3g49140 PE=1 SV=2	YOR054c	75.1	3e-13	COG0452	Phosphopantothenoylcysteine synthetase/decarboxylase	K11279	4e-161	566	vvi:100267878	nucleosome assembly protein 1-like 1	GO:0009294//DNA mediated transformation;GO:0046686//response to cadmium ion;GO:0006334//nucleosome assembly;GO:0006289//nucleotide-excision repair	GO:0003682//chromatin binding	GO:0005737//cytoplasm;GO:0005886//plasma membrane;GO:0005634//nucleus
Unigene3698_All	933	2.1808	2.7685	2.3107	gi|293331367|ref|NP_001168027.1|	103.6	4e-21	uncharacterized protein LOC100381753 [Zea mays]	--	--	--	--	sp|Q84TH9|NLP7_ARATH	102	3e-22	Protein NLP7 OS=Arabidopsis thaliana GN=NLP7 PE=1 SV=2	--	--	--	--	--	--	--	--	--	--	GO:0050896//response to stimulus	-	-
Unigene3713_All	2260	8.1615	11.6854	14.8456	gi|46389755|dbj|BAD15108.1|	360.9	0	ALG2-interacting protein X [Nicotiana tabacum]	gi|225424147|ref|XM_002283945.1|	246	8e-62	PREDICTED: Vitis vinifera ALG-2 interacting protein X-like (LOC100245656), mRNA	sp|Q93ZG9|FKB53_ARATH	73.9	7e-20	Peptidyl-prolyl cis-trans isomerase FKBP53 OS=Arabidopsis thaliana GN=FKBP53 PE=1 SV=1	YDR519w	48.9	2e-07	COG0545	FKBP-type peptidyl-prolyl cis-trans isomerases 1	K12200	0	435	pop:POPTR_820653	programmed cell death 6-interacting protein	-	-	GO:0009506//plasmodesma;GO:0005829//cytosol
Unigene37169_All	1068	19.093	19.9322	22.8356	gi|334187920|ref|NP_001190388.1|	371.3	1e-101	ABC1 family protein [Arabidopsis thaliana] >gi|332005982|gb|AED93365.1| ABC1 family protein [Arabidopsis thaliana]	gi|225429825|ref|XM_002283007.1|	133	4e-28	PREDICTED: Vitis vinifera uncharacterized LOC100242392 (LOC100242392), mRNA	--	--	--	--	PA1047	65.1	2e-10	COG1680	Beta-lactamase class C and other penicillin binding proteins	K08869	1e-102	371	ath:AT5G24810	aarF domain-containing kinase	GO:0030968//endoplasmic reticulum unfolded protein response	-	GO:0005794//Golgi apparatus;GO:0005783//endoplasmic reticulum;GO:0005886//plasma membrane
Unigene3727_All	853	1.089	1.0964	0.8951	--	--	--	--	gi|226500075|ref|NM_001157209.1|	61.9	9e-07	Zea mays LOC100284314 (pco114282), mRNA >gi|195641031|gb|EU967866.1| Zea mays clone 306726 zinc finger protein hangover mRNA, complete cds	--	--	--	--	--	--	--	--	--	--	--	--	--	--	-	-	-
Unigene3729_All	660	0.9383	0.9447	1.361	--	--	--	--	gi|226500075|ref|NM_001157209.1|	61.9	7e-07	Zea mays LOC100284314 (pco114282), mRNA >gi|195641031|gb|EU967866.1| Zea mays clone 306726 zinc finger protein hangover mRNA, complete cds	--	--	--	--	--	--	--	--	--	--	--	--	--	--	-	-	-
Unigene37353_All	704	7.1627	2.9099	2.2968	gi|147786897|emb|CAN73299.1|	102.4	5e-21	hypothetical protein VITISV_005183 [Vitis vinifera]	gi|359477936|ref|XM_002264933.2|	63.9	2e-07	PREDICTED: Vitis vinifera transcription factor bHLH62-like (LOC100259005), mRNA	sp|Q9FJL4|BH078_ARATH	50.8	7e-07	Transcription factor bHLH78 OS=Arabidopsis thaliana GN=BHLH78 PE=2 SV=1	--	--	--	--	--	--	--	--	--	--	-	-	-
Unigene37465_All	269	2.4665	1.9867	0.8348	--	--	--	--	--	--	--	--	--	--	--	--	--	--	--	--	--	--	--	--	--	--	-	-	-
Unigene3778_All	4616	12.1314	2.0839	1.946	gi|359481989|ref|XP_002277172.2|	2250.7	0	PREDICTED: pleiotropic drug resistance protein 2 [Vitis vinifera]	gi|359486941|ref|XM_002265592.2|	351	4e-93	PREDICTED: Vitis vinifera pleiotropic drug resistance protein 2-like (LOC100264279), mRNA	sp|Q2PCF1|PDR2_NICPL	2135	0	Pleiotropic drug resistance protein 2 OS=Nicotiana plumbaginifolia GN=PDR2 PE=2 SV=1	YDR406w_3	218	8e-56	COG1131	ABC-type multidrug transport system, ATPase component	K05681	4e-48	192	olu:OSTLU_38326	ATP-binding cassette, subfamily G (WHITE), member 2	GO:0006200//ATP catabolic process	GO:0015416//organic phosphonate transmembrane-transporting ATPase activity;GO:0005524//ATP binding	GO:0016020//membrane
Unigene3779_All	4361	9.8385	1.6033	1.5552	gi|224097670|ref|XP_002311035.1|	1952.6	0	predicted protein [Populus trichocarpa] >gi|222850855|gb|EEE88402.1| predicted protein [Populus trichocarpa]	gi|359486941|ref|XM_002265592.2|	359	2e-95	PREDICTED: Vitis vinifera pleiotropic drug resistance protein 2-like (LOC100264279), mRNA	sp|Q9ZUT8|AB33G_ARATH	1282	0	ABC transporter G family member 33 OS=Arabidopsis thaliana GN=ABCG33 PE=2 SV=1	YDR406w_3	219	3e-56	COG1131	ABC-type multidrug transport system, ATPase component	K12843	3e-48	192	vvi:100248403	U4/U6 small nuclear ribonucleoprotein PRP3	GO:0006200//ATP catabolic process	GO:0015416//organic phosphonate transmembrane-transporting ATPase activity;GO:0005524//ATP binding	GO:0016020//membrane
Unigene38296_All	301	2.6452	0.7398	0.2984	gi|312283319|dbj|BAJ34525.1|	71.6	3e-12	unnamed protein product [Thellungiella halophila]	gi|332640072|gb|CP002686.1|	75.8	2e-11	Arabidopsis thaliana chromosome 3, complete sequence	sp|Q9S7A9|SPL4_ARATH	70.1	3e-13	Squamosa promoter-binding-like protein 4 OS=Arabidopsis thaliana GN=SPL4 PE=1 SV=1	--	--	--	--	--	--	--	--	--	--	GO:0010321//regulation of vegetative phase change;GO:0006355//regulation of transcription, DNA-dependent	GO:0003700//sequence-specific DNA binding transcription factor activity;GO:0003677//DNA binding	GO:0005634//nucleus
Unigene38315_All	210	0.8425	1.2724	1.4971	--	--	--	--	gi|392513449|emb|FO082275.1|	65.9	1e-08	Bathycoccus prasinos genomic : Chromosome_4	--	--	--	--	--	--	--	--	--	--	--	--	--	--	-	-	-
Unigene3852_All	1400	2.5276	5.0261	13.2176	gi|356548349|ref|XP_003542565.1|	367.9	2e-100	PREDICTED: uncharacterized protein LOC100816661 [Glycine max]	gi|332640072|gb|CP002686.1|	153	6e-34	Arabidopsis thaliana chromosome 3, complete sequence	--	--	--	--	--	--	--	--	--	K14766	9e-06	50.1	osa:4333384	nucleolar protein 14	GO:0001666//response to hypoxia;GO:0009944//polarity specification of adaxial/abaxial axis;GO:0009862//systemic acquired resistance, salicylic acid mediated signaling pathway;GO:0010075//regulation of meristem growth;GO:0006355//regulation of transcription, DNA-dependent;GO:0010014//meristem initiation;GO:0009855//determination of bilateral symmetry;GO:0010310//regulation of hydrogen peroxide met…	-	-
Unigene3854_All	1387	7.2393	6.2612	9.1642	gi|225438331|ref|XP_002273284.1|	365.2	1e-99	PREDICTED: uncharacterized protein LOC100250855 [Vitis vinifera]	gi|225438330|ref|XM_002273248.1|	109	7e-21	PREDICTED: Vitis vinifera uncharacterized LOC100250855 (LOC100250855), mRNA	--	--	--	--	YOR054c	52	2e-06	COG0452	Phosphopantothenoylcysteine synthetase/decarboxylase	K01785	8e-07	53.5	ath:AT3G01260	aldose 1-epimerase [EC:5.1.3.3]	-	-	-
Unigene39570_All	242	2.0106	1.4722	1.4848	--	--	--	--	--	--	--	--	--	--	--	--	--	--	--	--	--	--	--	--	--	--	-	-	-
Unigene3959_All	2507	6.687	4.6187	5.8942	gi|224087327|ref|XP_002308122.1|	916.8	0	predicted protein [Populus trichocarpa] >gi|222854098|gb|EEE91645.1| predicted protein [Populus trichocarpa]	gi|225446274|ref|XM_002266728.1|	87.7	5e-14	PREDICTED: Vitis vinifera uncharacterized LOC100245404 (LOC100245404), mRNA	--	--	--	--	--	--	--	--	--	--	--	--	--	--	GO:0006346//methylation-dependent chromatin silencing;GO:0031048//chromatin silencing by small RNA;GO:0007267//cell-cell signaling;GO:0051567//histone H3-K9 methylation;GO:0048453//sepal formation;GO:0048507//meristem development;GO:0006306//DNA methylation;GO:0048451//petal formation;GO:0035196//production of miRNAs involved in gene silencing by miRNA;GO:0010267//production of ta-siRNAs involved…	-	-
Unigene3968_All	794	1.7827	3.141	2.4324	gi|15233583|ref|NP_193859.1|	144.1	2e-33	kinesin 1 [Arabidopsis thaliana] >gi|1170619|sp|Q07970.1|ATK1_ARATH RecName: Full=Kinesin-1; AltName: Full=Kinesin-like protein A >gi|303502|dbj|BAA01972.1| kinesin-like motor protein heavy chain [Arabidopsis thaliana] >gi|2911084|emb|CAA17546.1| kinesin-related protein katA [Arabidopsis thaliana] >gi|7268924|emb|CAB79127.1| kinesin-related protein katA [Arabidopsis thaliana] >gi|332659034|gb|AEE…	--	--	--	--	sp|Q07970|ATK1_ARATH	144	7e-35	Kinesin-1 OS=Arabidopsis thaliana GN=ATK1 PE=2 SV=1	SPAC664.10	95.5	9e-20	COG5059	Kinesin-like protein	K10405	2e-34	144	ath:AT4G21270	kinesin family member C1	GO:0016570//histone modification;GO:0010094//specification of carpel identity;GO:0044248//cellular catabolic process;GO:0007059//chromosome segregation;GO:0009736//cytokinin mediated signaling pathway;GO:0006342//chromatin silencing;GO:0007127//meiosis I;GO:0044281//small molecule metabolic process;GO:0000723//telomere maintenance;GO:0009723//response to ethylene stimulus;GO:0051258//protein poly…	GO:1901363;GO:0008569//minus-end-directed microtubule motor activity;GO:0005515//protein binding;GO:0097159//organic cyclic compound binding	GO:0009524//phragmoplast;GO:0005876//spindle microtubule;GO:0005634//nucleus
Unigene3971_All	2077	21.8502	14.3017	11.807	gi|224096716|ref|XP_002310709.1|	620.9	2e-176	glycosyl transferase, CAZy family GT43 [Populus trichocarpa] >gi|222853612|gb|EEE91159.1| glycosyl transferase, CAZy family GT43 [Populus trichocarpa] >gi|333951815|gb|AEG25425.1| glycosyltransferase GT43C [Populus trichocarpa]	gi|225312058|dbj|AK326796.1|	159	1e-35	Solanum lycopersicum cDNA, clone: LEFL2013O06, HTC in fruit	sp|Q8L707|IRX14_ARATH	547	8e-156	Probable beta-1,4-xylosyltransferase IRX14 OS=Arabidopsis thaliana GN=IRX14 PE=2 SV=1	--	--	--	--	--	--	--	--	--	--	GO:0010154//fruit development;GO:0007155//cell adhesion;GO:0045010//actin nucleation;GO:0010051//xylem and phloem pattern formation;GO:0010090//trichome morphogenesis;GO:0048765//root hair cell differentiation;GO:0010417//glucuronoxylan biosynthetic process;GO:0048367//shoot development;GO:0071555//cell wall organization	GO:0042285//xylosyltransferase activity	GO:0005802//trans-Golgi network;GO:0005794//Golgi apparatus;GO:0005768//endosome
Unigene3973_All	2032	20.1573	13.1062	12.4664	gi|224096716|ref|XP_002310709.1|	620.2	3e-176	glycosyl transferase, CAZy family GT43 [Populus trichocarpa] >gi|222853612|gb|EEE91159.1| glycosyl transferase, CAZy family GT43 [Populus trichocarpa] >gi|333951815|gb|AEG25425.1| glycosyltransferase GT43C [Populus trichocarpa]	gi|225312058|dbj|AK326796.1|	167	5e-38	Solanum lycopersicum cDNA, clone: LEFL2013O06, HTC in fruit	sp|Q8L707|IRX14_ARATH	549	3e-156	Probable beta-1,4-xylosyltransferase IRX14 OS=Arabidopsis thaliana GN=IRX14 PE=2 SV=1	--	--	--	--	--	--	--	--	--	--	GO:0010154//fruit development;GO:0007155//cell adhesion;GO:0045010//actin nucleation;GO:0010051//xylem and phloem pattern formation;GO:0010090//trichome morphogenesis;GO:0048765//root hair cell differentiation;GO:0010417//glucuronoxylan biosynthetic process;GO:0048367//shoot development;GO:0071555//cell wall organization	GO:0042285//xylosyltransferase activity	GO:0005802//trans-Golgi network;GO:0005794//Golgi apparatus;GO:0005768//endosome
Unigene40343_All	213	2.0767	1.4636	0.4217	--	--	--	--	--	--	--	--	--	--	--	--	--	--	--	--	--	--	--	--	--	--	-	-	-
Unigene40479_All	226	1.1743	0.5912	0	gi|147796315|emb|CAN72543.1|	53.1	1e-06	hypothetical protein VITISV_036602 [Vitis vinifera]	--	--	--	--	sp|Q9M086|DCAF1_ARATH	52.4	6e-08	DDB1- and CUL4-associated factor homolog 1 OS=Arabidopsis thaliana GN=DCAF1 PE=1 SV=2	YOR054c	69.3	2e-12	COG0452	Phosphopantothenoylcysteine synthetase/decarboxylase	K11323	6e-10	60.5	vcn:VOLCADRAFT_121342	histone arginine demethylase JMJD6 [EC:1.14.11.-]	-	GO:0005488//binding	-
Unigene40679_All	243	1.2742	0.5498	0.3697	--	--	--	--	--	--	--	--	--	--	--	--	--	--	--	--	--	--	--	--	--	--	-	-	-
Unigene4115_All	1507	7.0444	8.4518	7.8682	gi|147820620|emb|CAN67649.1|	392.9	6e-108	hypothetical protein VITISV_005080 [Vitis vinifera]	gi|359489722|ref|XM_002277084.2|	198	1e-47	PREDICTED: Vitis vinifera DEAD-box ATP-dependent RNA helicase 31-like (LOC100258444), mRNA	sp|Q9FNM7|RH26_ARATH	345	4e-95	DEAD-box ATP-dependent RNA helicase 26 OS=Arabidopsis thaliana GN=RH26 PE=1 SV=2	SPAC30D11.03	135	2e-31	COG0513	Superfamily II DNA and RNA helicases	K13179	4e-33	140	gmx:100798885	ATP-dependent RNA helicase DDX18/HAS1 [EC:3.6.4.13]	-	GO:0003676//nucleic acid binding;GO:0000166//nucleotide binding;GO:0004386//helicase activity	GO:0009507//chloroplast
Unigene4129_All	901	26.9521	41.3219	35.9414	gi|224117268|ref|XP_002331738.1|	177.2	2e-43	predicted protein [Populus trichocarpa] >gi|118487434|gb|ABK95545.1| unknown [Populus trichocarpa] >gi|222874264|gb|EEF11395.1| predicted protein [Populus trichocarpa]	--	--	--	--	--	--	--	--	--	--	--	--	--	--	--	--	--	--	GO:0016558//protein import into peroxisome matrix;GO:0006635//fatty acid beta-oxidation	-	GO:0016023//cytoplasmic membrane-bounded vesicle
Unigene4147_All	980	12.7734	20.3587	42.7602	gi|255557006|ref|XP_002519536.1|	154.1	2e-36	conserved hypothetical protein [Ricinus communis] >gi|223541399|gb|EEF42950.1| conserved hypothetical protein [Ricinus communis]	gi|225316197|dbj|AK322150.1|	105	8e-20	Solanum lycopersicum cDNA, clone: LEFL1034AD10, HTC in leaf	--	--	--	--	--	--	--	--	--	--	--	--	--	--	-	-	-
Unigene41562_All	201	1.1003	0.6647	0.2235	--	--	--	--	--	--	--	--	--	--	--	--	--	--	--	--	--	--	--	--	--	--	-	-	-
Unigene4209_All	1006	9.981	5.6664	4.7325	gi|87240431|gb|ABD32289.1|	168.7	1e-40	tRNA-binding arm; t-snare [Medicago truncatula]	gi|359490785|ref|XM_003634119.1|	97.6	2e-17	PREDICTED: Vitis vinifera golgin candidate 5-like, transcript variant 2 (LOC100250341), mRNA	sp|Q0WVL7|GOGC5_ARATH	161	6e-40	Golgin candidate 5 OS=Arabidopsis thaliana GN=GC5 PE=1 SV=1	--	--	--	--	--	K14306	7e-09	59.7	rcu:RCOM_1609340	nuclear pore complex protein Nup62	-	-	GO:0044424//intracellular part
Unigene42111_All	267	1.3253	1.1676	1.514	gi|224120914|ref|XP_002330857.1|	71.6	3e-12	predicted protein [Populus trichocarpa] >gi|222872679|gb|EEF09810.1| predicted protein [Populus trichocarpa]	--	--	--	--	--	--	--	--	--	--	--	--	--	--	--	--	--	--	GO:0044699;GO:0032502//developmental process	-	-
Unigene42148_All	307	0.4322	1.4506	0.4389	--	--	--	--	--	--	--	--	--	--	--	--	--	--	--	--	--	--	--	--	--	--	-	-	-
Unigene42276_All	642	2.7559	2.2892	2.3786	gi|359485064|ref|XP_002271414.2|	157.9	9e-38	PREDICTED: putative lipase ROG1-like [Vitis vinifera]	gi|225312764|dbj|AK320107.1|	135	6e-29	Solanum lycopersicum cDNA, clone: LEFL1005AF02, HTC in leaf	--	--	--	--	--	--	--	--	--	--	--	--	--	--	-	-	GO:0005739//mitochondrion;GO:0009507//chloroplast
Unigene42469_All	452	0.8807	1.0838	0.8943	--	--	--	--	--	--	--	--	--	--	--	--	--	--	--	--	--	--	--	--	--	--	-	-	-
Unigene42470_All	467	0.5683	0.9536	0.9618	--	--	--	--	--	--	--	--	--	--	--	--	--	--	--	--	--	--	--	--	--	--	-	-	-
Unigene4252_All	807	1.9732	5.4082	2.1149	gi|224059328|ref|XP_002299828.1|	425.6	3e-118	predicted protein [Populus trichocarpa] >gi|222847086|gb|EEE84633.1| predicted protein [Populus trichocarpa]	gi|356566152|ref|XM_003551251.1|	73.8	2e-10	PREDICTED: Glycine max laccase-4-like (LOC100782018), mRNA	sp|O80434|LAC4_ARATH	384	3e-107	Laccase-4 OS=Arabidopsis thaliana GN=IRX12 PE=2 SV=2	YFL041w	64.7	2e-10	COG2132	Putative multicopper oxidases	K00423	2e-19	94	pop:POPTR_1086023	L-ascorbate oxidase [EC:1.10.3.3]	GO:0009834//secondary cell wall biogenesis;GO:0046274//lignin catabolic process;GO:0055114//oxidation-reduction process	GO:0005507//copper ion binding;GO:0052716//hydroquinone:oxygen oxidoreductase activity;GO:0008447//L-ascorbate oxidase activity	GO:0048046//apoplast
Unigene42575_All	1301	5.9838	6.812	6.5593	gi|297737358|emb|CBI26559.3|	212.2	1e-53	unnamed protein product [Vitis vinifera]	gi|90855337|emb|CT571264.2|	69.9	6e-09	Medicago truncatula chromosome 5 clone mth2-146m15, COMPLETE SEQUENCE	sp|P59278|Y1745_ARATH	135	7e-32	Uncharacterized protein At1g51745 OS=Arabidopsis thaliana GN=At1g51745 PE=2 SV=2	--	--	--	--	--	K11294	6e-07	53.9	bdi:100836665	nucleolin	-	-	GO:0005634//nucleus;GO:0009506//plasmodesma
Unigene42577_All	869	10.9437	11.6846	13.955	gi|255555987|ref|XP_002519028.1|	122.5	7e-27	RNA polymerase-associated protein RTF1, putative [Ricinus communis] >gi|223541691|gb|EEF43239.1| RNA polymerase-associated protein RTF1, putative [Ricinus communis]	gi|224113964|ref|XM_002316592.1|	91.7	1e-15	Populus trichocarpa PAF1 complex component (PAFD902), mRNA	sp|Q9FLQ7|FH20_ARATH	50.4	1e-09	Formin-like protein 20 OS=Arabidopsis thaliana GN=FH20 PE=2 SV=3	--	--	--	--	--	K15178	7e-28	122	rcu:RCOM_0935630	RNA polymerase-associated protein RTF1	GO:0006810//transport;GO:0070918//production of small RNA involved in gene silencing by RNA;GO:0009910//negative regulation of flower development;GO:0035194//posttranscriptional gene silencing by RNA;GO:0051276//chromosome organization;GO:0005975//carbohydrate metabolic process;GO:0006464//cellular protein modification process;GO:0009416//response to light stimulus;GO:0045893//positive regulation…	-	-
Unigene42715_All	840	0.6846	4.5065	0.5882	--	--	--	--	--	--	--	--	--	--	--	--	--	--	--	--	--	--	--	--	--	--	-	-	-
Unigene42770_All	522	4.4063	3.3273	4.5603	gi|351722801|ref|NP_001238536.1|	138.7	3e-32	receptor-like kinase [Glycine max] >gi|223452315|gb|ACM89485.1| receptor-like kinase [Glycine max]	--	--	--	--	sp|C0LGR6|Y4291_ARATH	122	2e-28	Probable LRR receptor-like serine/threonine-protein kinase At4g29180 OS=Arabidopsis thaliana GN=At4g29180 PE=2 SV=2	BH2504_1	83.6	2e-16	COG0515	Serine/threonine protein kinase	K04733	2e-27	119	aly:ARALYDRAFT_916421	interleukin-1 receptor-associated kinase 4 [EC:2.7.11.1]	-	GO:0016301//kinase activity	-
Unigene43032_All	251	50.577	41.1635	41.8723	--	--	--	--	--	--	--	--	--	--	--	--	--	--	--	--	--	--	--	--	--	--	-	-	-
Unigene43072_All	251	1.586	2.3066	2.8631	--	--	--	--	--	--	--	--	--	--	--	--	--	--	--	--	--	--	--	--	--	--	-	-	-
Unigene43321_All	247	0	0.9015	0	--	--	--	--	--	--	--	--	--	--	--	--	--	--	--	--	--	--	--	--	--	--	-	-	-
Unigene4334_All	2227	34.5004	27.9167	27.3681	gi|48209969|gb|AAT40532.1|	628.6	1e-178	hydrolase, alpha/beta fold family protein [Solanum demissum]	gi|225312433|dbj|AK326973.1|	143	9e-31	Solanum lycopersicum cDNA, clone: LEFL2018E11, HTC in fruit	--	--	--	--	--	--	--	--	--	--	--	--	--	--	GO:0006486//protein glycosylation	GO:0016787//hydrolase activity	GO:0016023//cytoplasmic membrane-bounded vesicle;GO:0005634//nucleus
Unigene44175_All	250	1.9462	1.9595	1.9762	--	--	--	--	--	--	--	--	--	--	--	--	--	--	--	--	--	--	--	--	--	--	-	-	-
Unigene44857_All	328	1.0788	0.9504	0.8216	gi|224136294|ref|XP_002322293.1|	130.6	6e-30	predicted protein [Populus trichocarpa] >gi|222869289|gb|EEF06420.1| predicted protein [Populus trichocarpa]	gi|332640072|gb|CP002686.1|	107	7e-21	Arabidopsis thaliana chromosome 3, complete sequence	--	--	--	--	--	--	--	--	--	K15340	7e-08	53.5	ppp:PHYPADRAFT_135525	DNA cross-link repair 1A protein	-	-	GO:0005737//cytoplasm
Unigene45327_All	226	0.7829	2.3647	1.9874	--	--	--	--	gi|330414617|gb|HM635748.1|	87.7	4e-15	Galax urceolata clone Glx20 microsatellite sequence	--	--	--	--	--	--	--	--	--	--	--	--	--	--	-	-	-
Unigene4556_All	512	2.9373	3.5663	4.0353	gi|225432037|ref|XP_002273724.1|	262.7	1e-69	PREDICTED: uncharacterized protein LOC100243195 [Vitis vinifera] >gi|296083213|emb|CBI22849.3| unnamed protein product [Vitis vinifera]	gi|225432036|ref|XM_002273688.1|	117	1e-23	PREDICTED: Vitis vinifera uncharacterized LOC100243195 (LOC100243195), mRNA	sp|P51359|RR6_PORPU	46.6	8e-06	30S ribosomal protein S6, chloroplastic OS=Porphyra purpurea GN=rps6 PE=3 SV=1	PA4935	95.9	3e-20	COG0360	Ribosomal protein S6	--	--	--	--	--	GO:0031348//negative regulation of defense response;GO:0006346//methylation-dependent chromatin silencing;GO:0031048//chromatin silencing by small RNA;GO:0016246//RNA interference;GO:0006312//mitotic recombination;GO:0006261//DNA-dependent DNA replication;GO:0009793//embryo development ending in seed dormancy;GO:0051567//histone H3-K9 methylation;GO:0006412//translation;GO:0048449//floral organ f…	GO:0003677//DNA binding;GO:0003735//structural constituent of ribosome;GO:0016887//ATPase activity;GO:0005524//ATP binding;GO:0019843//rRNA binding	GO:0005840//ribosome;GO:0005663//DNA replication factor C complex;GO:0005634//nucleus
Unigene45638_All	278	2.0684	1.9224	0.3231	gi|356564488|ref|XP_003550486.1|	71.6	3e-12	PREDICTED: ankyrin repeat domain-containing protein 13B-like [Glycine max]	--	--	--	--	--	--	--	--	--	--	--	--	--	--	--	--	--	--	-	-	GO:0048046//apoplast
Unigene46_All	2638	10.1108	17.9793	28.7056	gi|356574499|ref|XP_003555384.1|	302.8	1e-80	PREDICTED: protein NLP6-like [Glycine max]	--	--	--	--	sp|Q8RWY4|NLP6_ARATH	286	3e-77	Protein NLP6 OS=Arabidopsis thaliana GN=NLP6 PE=2 SV=2	--	--	--	--	--	--	--	--	--	--	GO:0050896//response to stimulus	-	-
Unigene46053_All	235	0.9411	1.3266	0.5734	--	--	--	--	--	--	--	--	--	--	--	--	--	--	--	--	--	--	--	--	--	--	-	-	-
Unigene46719_All	391	0.2263	0.9112	0.5744	gi|357446695|ref|XP_003593623.1|	58.5	3e-08	Zinc finger CCCH domain-containing protein [Medicago truncatula] >gi|355482671|gb|AES63874.1| Zinc finger CCCH domain-containing protein [Medicago truncatula]	gi|242062775|ref|XM_002452632.1|	58	7e-06	Sorghum bicolor hypothetical protein, mRNA	sp|B0Z4R9|YCF2_OENAR	72.4	7e-14	Protein ycf2 OS=Oenothera argillicola GN=ycf2-A PE=3 SV=1	SPAC140.02	66.2	1e-11	COG0724	RNA-binding proteins (RRM domain)	K11323	4e-16	81.3	vcn:VOLCADRAFT_121342	histone arginine demethylase JMJD6 [EC:1.14.11.-]	-	GO:0005488//binding	-
Unigene46874_All	250	0.8847	0.3563	0.539	gi|388504088|gb|AFK40110.1|	23.1	9e-19	unknown [Medicago truncatula]	gi|356533396|ref|XM_003535203.1|	75.8	2e-11	PREDICTED: Glycine max threonine dehydratase biosynthetic, chloroplastic-like (LOC100777200), mRNA	sp|Q9ZSS6|THD1_ARATH	86.3	6e-19	Threonine dehydratase biosynthetic, chloroplastic OS=Arabidopsis thaliana GN=OMR1 PE=1 SV=1	RSc0449	56.6	1e-08	COG1171	Threonine dehydratase	K01754	7e-20	91.3	pop:POPTR_826476	threonine dehydratase [EC:4.3.1.19]	GO:0010498//proteasomal protein catabolic process;GO:0007010//cytoskeleton organization;GO:0009097//isoleucine biosynthetic process;GO:0006094//gluconeogenesis	GO:0004794//L-threonine ammonia-lyase activity	-
Unigene46875_All	231	0.7659	0.3856	1.1666	gi|242038359|ref|XP_002466574.1|	99.8	1e-20	hypothetical protein SORBIDRAFT_01g010250 [Sorghum bicolor] >gi|241920428|gb|EER93572.1| hypothetical protein SORBIDRAFT_01g010250 [Sorghum bicolor]	gi|356533396|ref|XM_003535203.1|	75.8	2e-11	PREDICTED: Glycine max threonine dehydratase biosynthetic, chloroplastic-like (LOC100777200), mRNA	sp|Q9ZSS6|THD1_ARATH	94	2e-20	Threonine dehydratase biosynthetic, chloroplastic OS=Arabidopsis thaliana GN=OMR1 PE=1 SV=1	RSc0449	65.5	2e-11	COG1171	Threonine dehydratase	K01754	9e-22	99.8	sbi:SORBI_01g010250	threonine dehydratase [EC:4.3.1.19]	GO:0010498//proteasomal protein catabolic process;GO:0007010//cytoskeleton organization;GO:0006566//threonine metabolic process;GO:0009097//isoleucine biosynthetic process;GO:0006094//gluconeogenesis	GO:0004794//L-threonine ammonia-lyase activity	GO:0009507//chloroplast
Unigene47032_All	803	10.0805	8.43	8.9493	gi|225448751|ref|XP_002281489.1|	169.1	6e-41	PREDICTED: uncharacterized protein LOC100255322 [Vitis vinifera] >gi|297736455|emb|CBI25326.3| unnamed protein product [Vitis vinifera]	gi|225448750|ref|XM_002281453.1|	105	7e-20	PREDICTED: Vitis vinifera uncharacterized LOC100255322 (LOC100255322), mRNA	--	--	--	--	--	--	--	--	--	--	--	--	--	--	-	-	GO:0005829//cytosol
Unigene47054_All	245	0.3611	1.636	2.5665	--	--	--	--	gi|330414617|gb|HM635748.1|	63.9	6e-08	Galax urceolata clone Glx20 microsatellite sequence	--	--	--	--	--	--	--	--	--	--	--	--	--	--	-	-	-
Unigene4715_All	1430	46.862	41.2024	37.9102	gi|225451945|ref|XP_002283034.1|	544.3	1e-153	PREDICTED: uncharacterized protein LOC100256561 [Vitis vinifera] >gi|298204389|emb|CBI16869.3| unnamed protein product [Vitis vinifera]	gi|359488341|ref|XM_002282998.2|	327	2e-86	PREDICTED: Vitis vinifera uncharacterized LOC100256561 (LOC100256561), mRNA	--	--	--	--	--	--	--	--	--	--	--	--	--	--	-	-	GO:0016021//integral to membrane;GO:0009506//plasmodesma;GO:0005783//endoplasmic reticulum;GO:0005739//mitochondrion
Unigene47177_All	1163	0.7226	0.6893	0.9655	gi|255544590|ref|XP_002513356.1|	317.8	1e-85	Cell division protein ftsH, putative [Ricinus communis] >gi|223547264|gb|EEF48759.1| Cell division protein ftsH, putative [Ricinus communis]	gi|225431468|ref|XM_002274301.1|	147	3e-32	PREDICTED: Vitis vinifera callose synthase 5-like (LOC100248918), mRNA	sp|Q9SAJ3|FTSHC_ARATH	308	3e-84	ATP-dependent zinc metalloprotease FTSH 12, chloroplastic OS=Arabidopsis thaliana GN=FTSH12 PE=2 SV=2	--	--	--	--	--	K03798	2e-86	317	rcu:RCOM_1574610	cell division protease FtsH [EC:3.4.24.-]	GO:0010584//pollen exine formation;GO:0009827//plant-type cell wall modification;GO:0009793//embryo development ending in seed dormancy;GO:0051301//cell division;GO:0009846//pollen germination;GO:0010304//PSII associated light-harvesting complex II catabolic process;GO:0009556//microsporogenesis;GO:0006075//(1->3)-beta-D-glucan biosynthetic process;GO:0009658//chloroplast organization;GO:0080092/…	GO:0004176//ATP-dependent peptidase activity;GO:0004222//metalloendopeptidase activity;GO:0030170//pyridoxal phosphate binding;GO:0003843//1,3-beta-D-glucan synthase activity;GO:0005524//ATP binding	GO:0009941//chloroplast envelope;GO:0000148//1,3-beta-D-glucan synthase complex;GO:0005739//mitochondrion
Unigene47324_All	479	4.3402	3.719	4.407	--	--	--	--	--	--	--	--	--	--	--	--	--	--	--	--	--	--	--	--	--	--	-	-	-
Unigene47817_All	221	1.401	1.2091	3.8614	--	--	--	--	--	--	--	--	--	--	--	--	--	--	--	--	--	--	--	--	--	--	-	-	-
Unigene47863_All	1703	5.5583	5.9362	6.4088	gi|297737358|emb|CBI26559.3|	240.7	4e-62	unnamed protein product [Vitis vinifera]	gi|312283552|dbj|AK353556.1|	77.8	3e-11	Thellungiella halophila mRNA, complete cds, clone: RTFL01-52-J19	sp|P59278|Y1745_ARATH	135	5e-32	Uncharacterized protein At1g51745 OS=Arabidopsis thaliana GN=At1g51745 PE=2 SV=2	YDR170c	58.2	4e-08	COG5307	SEC7 domain proteins	K11294	3e-10	65.1	osa:4344865	nucleolin	-	-	-
Unigene47864_All	1682	4.9177	4.5541	4.406	gi|297737358|emb|CBI26559.3|	240.7	4e-62	unnamed protein product [Vitis vinifera]	gi|312283552|dbj|AK353556.1|	77.8	3e-11	Thellungiella halophila mRNA, complete cds, clone: RTFL01-52-J19	sp|P59278|Y1745_ARATH	135	5e-32	Uncharacterized protein At1g51745 OS=Arabidopsis thaliana GN=At1g51745 PE=2 SV=2	YDR170c	58.2	4e-08	COG5307	SEC7 domain proteins	K11294	3e-10	65.1	osa:4344865	nucleolin	-	-	-
Unigene47996_All	381	2.6702	2.8053	5.0691	--	--	--	--	gi|356541779|ref|XR_137001.1|	63.9	1e-07	PREDICTED: Glycine max floral homeotic protein APETALA 2-like (LOC100786333), miscRNA	--	--	--	--	--	--	--	--	--	--	--	--	--	--	-	-	-
Unigene48103_All	982	28.1522	24.4895	24.927	--	--	--	--	--	--	--	--	--	--	--	--	--	--	--	--	--	--	--	--	--	--	-	-	-
Unigene48636_All	221	0.8006	0.6045	1.4226	--	--	--	--	--	--	--	--	--	--	--	--	--	--	--	--	--	--	--	--	--	--	-	-	-
Unigene48637_All	243	0.7281	0.1833	1.8483	--	--	--	--	--	--	--	--	--	--	--	--	--	--	--	--	--	--	--	--	--	--	-	-	-
Unigene48647_All	307	1.2967	0.8704	1.3167	--	--	--	--	--	--	--	--	--	--	--	--	--	--	--	--	--	--	--	--	--	--	-	-	-
Unigene4870_All	1543	48.7622	30.4787	27.4492	gi|225456459|ref|XP_002284444.1|	636.3	0	PREDICTED: V-type proton ATPase subunit C [Vitis vinifera] >gi|297734491|emb|CBI15738.3| unnamed protein product [Vitis vinifera]	gi|359491131|ref|XM_002284408.2|	305	7e-80	PREDICTED: Vitis vinifera V-type proton ATPase subunit C-like (LOC100266332), mRNA	sp|Q9SDS7|VATC_ARATH	597	6e-171	V-type proton ATPase subunit C OS=Arabidopsis thaliana GN=VHA-C PE=1 SV=1	YKL080w	207	4e-53	COG5127	Vacuolar H+-ATPase V1 sector, subunit C	K02148	0	636	vvi:100266332	V-type H+-transporting ATPase subunit C [EC:3.6.3.14]	GO:0043255//regulation of carbohydrate biosynthetic process;GO:0051788//response to misfolded protein;GO:0009853//photorespiration;GO:0030243//cellulose metabolic process;GO:0006007//glucose catabolic process;GO:0006816//calcium ion transport;GO:0009651//response to salt stress;GO:0015991//ATP hydrolysis coupled proton transport;GO:0007033//vacuole organization;GO:0009809//lignin biosynthetic pro…	GO:0046961//proton-transporting ATPase activity, rotational mechanism	GO:0000325//plant-type vacuole;GO:0009507//chloroplast;GO:0005794//Golgi apparatus;GO:0005829//cytosol;GO:0000221//vacuolar proton-transporting V-type ATPase, V1 domain;GO:0005886//plasma membrane
Unigene48757_All	306	0.5782	1.3098	2.4952	--	--	--	--	gi|123706400|emb|AM466181.1|	61.9	3e-07	Vitis vinifera contig VV78X065033.6, whole genome shotgun sequence	--	--	--	--	--	--	--	--	--	--	--	--	--	--	-	-	-
Unigene48846_All	222	0.9962	0.6018	1.2139	gi|255582832|ref|XP_002532189.1|	68.6	2e-11	ricin-agglutinin family protein [Ricinus communis] >gi|223528121|gb|EEF30192.1| ricin-agglutinin family protein [Ricinus communis]	--	--	--	--	sp|P81446|ML1_VISAL	67.4	2e-12	Beta-galactoside-specific lectin 1 OS=Viscum album PE=1 SV=3	--	--	--	--	--	--	--	--	--	--	-	-	-
Unigene49221_All	277	0.4791	0.8039	3.8915	gi|116786141|gb|ABK23993.1|	105.1	2e-22	unknown [Picea sitchensis]	gi|270146869|gb|BT113821.1|	67.9	5e-09	Picea glauca clone GQ03502_C13 mRNA sequence	sp|Q9LHG9|NACA1_ARATH	102	7e-23	Nascent polypeptide-associated complex subunit alpha-like protein 1 OS=Arabidopsis thaliana GN=At3g12390 PE=1 SV=1	YHR193c	58.9	2e-09	COG1308	Transcription factor homologous to NACalpha-BTF3	K03626	8e-23	103	sbi:SORBI_01g035320	nascent polypeptide-associated complex subunit alpha	GO:0006606//protein import into nucleus;GO:0051604//protein maturation;GO:0009651//response to salt stress	-	GO:0022626//cytosolic ribosome;GO:0005794//Golgi apparatus;GO:0009506//plasmodesma;GO:0005634//nucleus
Unigene493_All	637	2.7776	3.6355	1.6217	gi|89179421|gb|ABD63156.1|	109.8	2e-23	Retrotransposon gag protein [Asparagus officinalis]	--	--	--	--	--	--	--	--	--	--	--	--	--	--	--	--	--	--	-	-	-
Unigene49738_All	212	2.921	6.9323	7.2032	--	--	--	--	gi|323500678|gb|HQ222361.1|	58	3e-06	Helianthus annuus cultivar HA383 clone BAC P102A12, complete sequence	--	--	--	--	--	--	--	--	--	--	--	--	--	--	-	-	-
Unigene50004_All	247	0.3582	0.1803	0.9092	--	--	--	--	--	--	--	--	--	--	--	--	--	--	--	--	--	--	--	--	--	--	-	-	-
Unigene5020_All	1421	52.9798	44.2526	41.5639	gi|225433688|ref|XP_002266909.1|	625.5	5e-178	PREDICTED: eukaryotic translation initiation factor 3 subunit H [Vitis vinifera] >gi|296089621|emb|CBI39440.3| unnamed protein product [Vitis vinifera]	gi|225433687|ref|XM_002266873.1|	745	0	PREDICTED: Vitis vinifera eukaryotic translation initiation factor 3 subunit H-like (LOC100248036), mRNA	sp|Q9C5Z2|EIF3H_ARATH	585	2e-167	Eukaryotic translation initiation factor 3 subunit H OS=Arabidopsis thaliana GN=TIF3H1 PE=2 SV=2	ECU11g0570	63.2	1e-09	COG1310	Predicted metal-dependent protease of the PAD1/JAB1 superfamily	K03247	5e-179	625	vvi:100248036	translation initiation factor 3 subunit H	GO:0006413//translational initiation;GO:0009640//photomorphogenesis;GO:0000085//G2 phase of mitotic cell cycle;GO:0010388//cullin deneddylation	GO:0003743//translation initiation factor activity	GO:0005852//eukaryotic translation initiation factor 3 complex;GO:0005829//cytosol
Unigene50482_All	353	0.8771	1.3878	2.0358	--	--	--	--	gi|330414617|gb|HM635748.1|	61.9	4e-07	Galax urceolata clone Glx20 microsatellite sequence	--	--	--	--	--	--	--	--	--	--	--	--	--	--	-	-	-
Unigene5064_All	324	1.6383	4.5359	4.2974	gi|224075024|ref|XP_002304523.1|	97.4	5e-20	predicted protein [Populus trichocarpa] >gi|222841955|gb|EEE79502.1| predicted protein [Populus trichocarpa]	gi|90656139|gb|DQ455192.1|	67.9	6e-09	Medicago truncatula cDNA-AFLP fragment BC41M12_122 sequence	sp|Q9SH58|MAKR2_ARATH	72.4	6e-14	Probable membrane-associated kinase regulator 2 OS=Arabidopsis thaliana GN=MAKR2 PE=2 SV=1	--	--	--	--	--	--	--	--	--	--	-	-	GO:0005634//nucleus;GO:0005886//plasma membrane
Unigene50645_All	796	5.2235	5.427	6.8274	--	--	--	--	--	--	--	--	--	--	--	--	--	--	--	--	--	--	--	--	--	--	-	-	-
Unigene50937_All	217	26.0912	25.8588	30.2188	gi|218198623|gb|EEC81050.1|	53.9	7e-07	hypothetical protein OsI_23843 [Oryza sativa Indica Group]	gi|334187841|ref|NM_001203438.1|	61.9	2e-07	Arabidopsis thaliana MORN (Membrane Occupation and Recognition Nexus) repeat-containing protein (emb1211) mRNA, complete cds	sp|Q6DBM8|MTPB_ARATH	48.1	1e-06	Metal tolerance protein B OS=Arabidopsis thaliana GN=MTPB PE=2 SV=1	ZyohM	49.7	1e-06	COG2215	ABC-type uncharacterized transport system, permease component	K11968	7e-09	57	pop:POPTR_832209	ariadne-1	-	-	-
Unigene51316_All	215	0.4115	0.2071	2.5068	--	--	--	--	--	--	--	--	--	--	--	--	--	--	--	--	--	--	--	--	--	--	-	-	-
Unigene51990_All	242	0.1828	0.184	1.2992	gi|356550661|ref|XP_003543703.1|	50.4	8e-06	PREDICTED: probable WRKY transcription factor 40-like isoform 2 [Glycine max]	--	--	--	--	--	--	--	--	--	--	--	--	--	--	--	--	--	--	-	-	-
Unigene5237_All	588	5.0401	6.1349	4.8122	gi|37781226|gb|AAP44390.1|	193	2e-48	nematode resistance protein [Solanum tuberosum]	gi|7381246|gb|AF139523.1|AF139523	71.9	7e-10	Tagetes erecta disease-resistance protein NRSA1 gene, complete cds	sp|Q40392|TMVRN_NICGU	159	1e-39	TMV resistance protein N OS=Nicotiana glutinosa GN=N PE=1 SV=1	--	--	--	--	--	--	--	--	--	--	-	GO:0000166//nucleotide binding	-
Unigene5466_All	336	6.1873	6.7597	5.3469	--	--	--	--	gi|147800327|emb|AM483931.2|	97.6	6e-18	Vitis vinifera contig VV78X206734.9, whole genome shotgun sequence	--	--	--	--	--	--	--	--	--	--	--	--	--	--	-	-	-
Unigene5826_All	688	5.2719	5.9552	6.463	gi|147779975|emb|CAN75533.1|	137.1	2e-31	hypothetical protein VITISV_024796 [Vitis vinifera]	--	--	--	--	--	--	--	--	--	--	--	--	--	--	--	--	--	--	-	GO:0003824//catalytic activity	-
Unigene586_All	1000	7.2099	2.2267	4.8957	--	--	--	--	--	--	--	--	--	--	--	--	PH0283	50.4	5e-06	COG1318	Predicted transcriptional regulators	--	--	--	--	--	-	-	-
Unigene5949_All	514	62.8209	64.1161	46.3124	gi|296084542|emb|CBI25563.3|	124	9e-28	unnamed protein product [Vitis vinifera]	gi|385268659|gb|JQ679484.1|	65.9	4e-08	Oenothera harringtonii clone OHD12 microsatellite sequence	sp|Q6Z1C0|NUCL1_ORYSJ	52.4	1e-07	Nucleolin 1 OS=Oryza sativa subsp. japonica GN=Os08g0192900 PE=2 SV=1	YOR054c	64.3	1e-10	COG0452	Phosphopantothenoylcysteine synthetase/decarboxylase	K09272	3e-11	65.9	cme:CMS034C	structure-specific recognition protein 1	-	-	-
Unigene5967_All	464	60.7248	38.2	33.0081	gi|297746087|emb|CBI16143.3|	125.2	3e-28	unnamed protein product [Vitis vinifera]	--	--	--	--	sp|Q9SNC3|FLA4_ARATH	100	4e-22	Fasciclin-like arabinogalactan protein 4 OS=Arabidopsis thaliana GN=FLA4 PE=1 SV=1	Rv2264c	52.8	2e-07	COG0443	Molecular chaperone	K01115	6e-10	61.2	vcn:VOLCADRAFT_99471	phospholipase D [EC:3.1.4.4]	GO:0009825//multidimensional cell growth;GO:0006950//response to stress;GO:0007155//cell adhesion	GO:0030247//polysaccharide binding	GO:0046658//anchored to plasma membrane;GO:0009897//external side of plasma membrane
Unigene606_All	950	4.563	5.0629	6.0043	gi|255559159|ref|XP_002520601.1|	221.1	1e-56	RNA binding protein, putative [Ricinus communis] >gi|223540200|gb|EEF41774.1| RNA binding protein, putative [Ricinus communis]	gi|359473506|ref|XM_002273550.2|	165	1e-37	PREDICTED: Vitis vinifera uncharacterized LOC100249627 (LOC100249627), mRNA	--	--	--	--	--	--	--	--	--	K13093	1e-07	55.8	sbi:SORBI_05g002130	HIV Tat-specific factor 1	-	GO:0003723//RNA binding;GO:0000166//nucleotide binding;GO:0008270//zinc ion binding	GO:0005622//intracellular
Unigene6263_All	366	5.1968	5.7189	3.1906	gi|334188512|ref|NP_001190577.1|	74.7	4e-13	AP2/B3 domain-containing protein [Arabidopsis thaliana] >gi|332009900|gb|AED97283.1| AP2/B3 domain-containing protein [Arabidopsis thaliana]	gi|261597388|gb|GU011800.1|	67.9	6e-09	Tabebuia rosea microsatellite D122_M13R_seg112 sequence	sp|Q9LVG1|Y5013_ARATH	67.4	2e-12	B3 domain-containing protein At5g60130 OS=Arabidopsis thaliana GN=At5g60130 PE=2 SV=1	YGL028c	54.7	4e-08	COG5309	Exo-beta-1,3-glucanase	K11323	5e-10	60.8	vcn:VOLCADRAFT_121342	histone arginine demethylase JMJD6 [EC:1.14.11.-]	GO:0046854//phosphatidylinositol phosphorylation	-	-
Unigene6375_All	295	2.699	2.7174	2.436	--	--	--	--	gi|21165812|gb|AF440263.1|	61.9	3e-07	Pinus taeda microsatellite PtTX2007 sequence	sp|Q7XTS3|AGO3_ORYSJ	45.4	7e-06	Protein argonaute 3 OS=Oryza sativa subsp. japonica GN=AGO3 PE=2 SV=2	--	--	--	--	--	--	--	--	--	--	-	-	-
Unigene687_All	1640	30.1269	26.5579	28.6739	gi|350538715|ref|NP_001234356.1|	729.2	0	cullin 4 [Solanum lycopersicum] >gi|159895408|gb|ABX09988.1| cullin 4 [Solanum lycopersicum]	gi|359483874|ref|XM_002270728.2|	375	1e-101	PREDICTED: Vitis vinifera cullin 4 (CUL4), mRNA	sp|Q8LGH4|CUL4_ARATH	638	0	Cullin-4 OS=Arabidopsis thaliana GN=CUL4 PE=1 SV=1	SPAC17G6.12	136	9e-32	COG5647	Cullin, a subunit of E3 ubiquitin ligase	K10609	0	723	rcu:RCOM_0632460	cullin 4	GO:0000209//protein polyubiquitination;GO:0009880//embryonic pattern specification;GO:0050826//response to freezing;GO:0048575//short-day photoperiodism, flowering;GO:0009755//hormone-mediated signaling pathway;GO:0048825//cotyledon development;GO:0051301//cell division;GO:0010564//regulation of cell cycle process;GO:0006511//ubiquitin-dependent protein catabolic process;GO:0019915//lipid storage…	GO:0031625//ubiquitin protein ligase binding	GO:0080008//Cul4-RING ubiquitin ligase complex;GO:0005829//cytosol;GO:0005634//nucleus
Unigene6993_All	850	6.2446	7.3351	10.4095	gi|357479315|ref|XP_003609943.1|	197.6	1e-49	Polyphosphoinositide phosphatase [Medicago truncatula] >gi|355510998|gb|AES92140.1| Polyphosphoinositide phosphatase [Medicago truncatula]	gi|147809831|emb|AM439509.2|	83.8	3e-13	Vitis vinifera contig VV78X216591.18, whole genome shotgun sequence	--	--	--	--	YNL325c	81.6	1e-15	COG5329	Phosphoinositide polyphosphatase (Sac family)	--	--	--	--	--	GO:0046855//inositol phosphate dephosphorylation;GO:0032957//inositol trisphosphate metabolic process	GO:0004439//phosphatidylinositol-4,5-bisphosphate 5-phosphatase activity	GO:0005634//nucleus
Unigene7407_All	1828	6.0977	88.9232	149.387	gi|336462654|gb|AEI59768.1|	566.2	5e-160	cytochrome P450 [Helianthus annuus]	gi|336462653|gb|HQ439595.1|	97.6	4e-17	Helianthus annuus clone S4 cytochrome P450 mRNA, complete cds	sp|O81973|C93A3_SOYBN	524	8e-149	Cytochrome P450 93A3 OS=Glycine max GN=CYP93A3 PE=2 SV=1	BH0579	134	7e-31	COG2124	Cytochrome P450	K13261	1e-139	494	gmx:100776878	cytochrome P450, family 93, subfamily A, polypeptide 1 (3,9-dihydroxypterocarpan 6a-monooxygenase) [EC:1.14.13.28]	-	GO:0016491//oxidoreductase activity;GO:0005488//binding	-
Unigene7428_All	601	8.8318	5.3353	5.6797	gi|359492922|ref|XP_002285705.2|	137.9	9e-32	PREDICTED: LOW QUALITY PROTEIN: transcription factor bHLH145-like [Vitis vinifera]	gi|332189094|gb|CP002684.1|	67.9	1e-08	Arabidopsis thaliana chromosome 1, complete sequence	sp|Q9FMF4|SAC51_ARATH	80.5	6e-16	Transcription factor SAC51 OS=Arabidopsis thaliana GN=SAC51 PE=2 SV=1	--	--	--	--	--	K14559	4e-06	49.3	vcn:VOLCADRAFT_88196	U3 small nucleolar RNA-associated protein MPP10	GO:0009888//tissue development;GO:0060560//developmental growth involved in morphogenesis;GO:0000902//cell morphogenesis;GO:0048513//organ development;GO:0009059//macromolecule biosynthetic process;GO:0044238//primary metabolic process;GO:0050789//regulation of biological process;GO:0016049//cell growth	-	-
Unigene7445_All	1109	0.4387	4.6181	26.8109	gi|296081204|emb|CBI18230.3|	211.1	2e-53	unnamed protein product [Vitis vinifera]	gi|164458461|gb|EU164420.1|	133	4e-28	Solanum lycopersicum RAP2.6-like protein gene, complete cds	sp|Q9FGF8|ABR1_ARATH	147	1e-35	Ethylene-responsive transcription factor ABR1 OS=Arabidopsis thaliana GN=ABR1 PE=2 SV=1	--	--	--	--	--	K09286	1e-30	132	ath:AT1G43160	EREBP-like factor	-	-	-
Unigene7498_All	449	1.6747	3.174	1.9006	--	--	--	--	--	--	--	--	--	--	--	--	--	--	--	--	--	--	--	--	--	--	-	-	-
Unigene7522_All	297	2.6808	0.7497	1.2098	--	--	--	--	--	--	--	--	--	--	--	--	--	--	--	--	--	--	--	--	--	--	-	-	-
Unigene7554_All	3299	4.1028	4.5898	5.0782	gi|359476073|ref|XP_002281904.2|	1231.5	0	PREDICTED: uncharacterized protein LOC100247424 [Vitis vinifera]	gi|225319728|dbj|AK324289.1|	454	1e-124	Solanum lycopersicum cDNA, clone: LEFL1075BE04, HTC in leaf	sp|A3EWL3|REV1_ARATH	60.1	9e-18	DNA repair protein REV1 OS=Arabidopsis thaliana GN=REV1 PE=2 SV=1	--	--	--	--	--	K03515	1e-22	65.9	vvi:100247553	DNA repair protein REV1 [EC:2.7.7.-]	GO:0009793//embryo development ending in seed dormancy;GO:0009630//gravitropism	-	GO:0009507//chloroplast;GO:0048046//apoplast
Unigene7560_All	1626	5.0598	4.6288	5.5798	gi|147835801|emb|CAN61992.1|	324.3	3e-87	hypothetical protein VITISV_030445 [Vitis vinifera]	gi|359492692|ref|XM_002281082.2|	141	2e-30	PREDICTED: Vitis vinifera transcription factor bHLH110-like (LOC100260944), mRNA	sp|Q9SFZ3|BH110_ARATH	226	2e-59	Transcription factor bHLH110 OS=Arabidopsis thaliana GN=BHLH110 PE=2 SV=2	--	--	--	--	--	--	--	--	--	--	-	-	GO:0005634//nucleus
Unigene7598_All	1247	8.1229	6.5356	5.7629	gi|255558560|ref|XP_002520305.1|	385.2	1e-105	ATP binding protein, putative [Ricinus communis] >gi|223540524|gb|EEF42091.1| ATP binding protein, putative [Ricinus communis]	gi|359492360|ref|XR_139873.1|	63.9	4e-07	PREDICTED: Vitis vinifera probable receptor-like protein kinase At5g18500-like (LOC100267665), miscRNA	sp|Q5XF57|Y5576_ARATH	60.8	2e-09	Probable receptor-like serine/threonine-protein kinase At5g57670 OS=Arabidopsis thaliana GN=At5g57670 PE=2 SV=1	--	--	--	--	--	--	--	--	--	--	GO:0050896//response to stimulus	GO:0004672//protein kinase activity	-
Unigene7655_All	1224	15.3948	15.9728	17.8336	gi|351722801|ref|NP_001238536.1|	70.1	7e-11	receptor-like kinase [Glycine max] >gi|223452315|gb|ACM89485.1| receptor-like kinase [Glycine max]	--	--	--	--	sp|O80623|Y2393_ARATH	198	6e-51	Probable receptor-like protein kinase At2g39360 OS=Arabidopsis thaliana GN=At2g39360 PE=1 SV=1	lin1934_1	84.7	3e-16	COG0515	Serine/threonine protein kinase	K04733	4e-44	177	aly:ARALYDRAFT_916421	interleukin-1 receptor-associated kinase 4 [EC:2.7.11.1]	-	GO:0016301//kinase activity	-
Unigene7672_All	2801	12.3808	6.2962	4.5379	gi|359486198|ref|XP_002268959.2|	1047	0	PREDICTED: uncharacterized protein LOC100242129 [Vitis vinifera]	gi|395399799|gb|JQ867271.1|	133	1e-27	Gossypium arboreum trichome branching-like protein gene, complete cds	--	--	--	--	alr4932	242	2e-63	COG2812	DNA polymerase III, gamma/tau subunits	K10756	3e-18	92.4	olu:OSTLU_119614	replication factor C subunit 3/5	GO:0048589//developmental growth;GO:0007155//cell adhesion;GO:0045010//actin nucleation;GO:0033044//regulation of chromosome organization;GO:0016926//protein desumoylation;GO:0048449//floral organ formation;GO:0003002//regionalization;GO:0050665//hydrogen peroxide biosynthetic process;GO:0022402//cell cycle process;GO:0048765//root hair cell differentiation;GO:0010228//vegetative to reproductive …	GO:1901363;GO:0016740//transferase activity;GO:0097159//organic cyclic compound binding	GO:0005886//plasma membrane;GO:0005634//nucleus
Unigene7794_All	1932	7.0974	5.5092	4.7657	gi|111146936|gb|ABH07409.1|	654.8	0	putative pol polyprotein [Brassica oleracea var. botrytis]	gi|332656411|gb|CP002687.1|	87.7	4e-14	Arabidopsis thaliana chromosome 4, complete sequence	sp|P10978|POLX_TOBAC	372	5e-103	Retrovirus-related Pol polyprotein from transposon TNT 1-94 OS=Nicotiana tabacum PE=2 SV=1	--	--	--	--	--	K05356	4e-33	141	sbi:SORBI_0011s005450	all-trans-nonaprenyl-diphosphate synthase [EC:2.5.1.84 2.5.1.85]	-	-	-
Unigene7799_All	897	1.2821	1.6384	5.4077	gi|6094086|sp|O65353.1|RL5_HELAN	421.4	8e-117	RecName: Full=60S ribosomal protein L5 >gi|3153904|gb|AAC17448.1| RPL5A-related protein [Helianthus annuus]	gi|3153903|gb|AF066077.1|AF066077	129	5e-27	Helianthus annuus RPL5A-related protein (RPL5A) mRNA, complete cds	sp|O65353|RL5_HELAN	421	3e-118	60S ribosomal protein L5 OS=Helianthus annuus GN=RPL5A PE=2 SV=1	SPBC11C11.09c	303	3e-82	COG0256	Ribosomal protein L18	K02932	2e-91	333	pop:POPTR_732569	large subunit ribosomal protein L5e	GO:0048513//organ development;GO:0009653//anatomical structure morphogenesis	-	GO:0044446//intracellular organelle part;GO:0022626//cytosolic ribosome;GO:0016020//membrane;GO:0005634//nucleus
Unigene7805_All	1967	57.0282	40.2556	42.9962	gi|356549976|ref|XP_003543366.1|	157.9	3e-143	PREDICTED: ribosomal RNA processing protein 1 homolog [Glycine max]	gi|356549975|ref|XM_003543318.1|	73.8	6e-10	PREDICTED: Glycine max ribosomal RNA processing protein 1 homolog (LOC100798373), mRNA	sp|P14918|EXTN_MAIZE	77.4	3e-14	Extensin OS=Zea mays GN=HRGP PE=2 SV=1	SPBC28F2.12	76.3	2e-13	COG0086	DNA-directed RNA polymerase, beta' subunit/160 kD subunit	K14849	5e-138	353	vvi:100247924	ribosomal RNA-processing protein 1	GO:0006606//protein import into nucleus	-	GO:0005634//nucleus;GO:0005829//cytosol
Unigene7813_All	1489	11.9123	8.4045	6.6663	gi|225443351|ref|XP_002265018.1|	662.5	0	PREDICTED: kelch repeat-containing protein At3g27220 [Vitis vinifera] >gi|297735771|emb|CBI18458.3| unnamed protein product [Vitis vinifera]	gi|225321114|dbj|AK325325.1|	268	1e-68	Solanum lycopersicum cDNA, clone: LEFL1095BA06, HTC in leaf	sp|Q9LK31|Y3272_ARATH	541	4e-154	Kelch repeat-containing protein At3g27220 OS=Arabidopsis thaliana GN=At3g27220 PE=1 SV=1	--	--	--	--	--	--	--	--	--	--	GO:0009061//anaerobic respiration;GO:0006869//lipid transport	-	GO:0005768//endosome;GO:0005794//Golgi apparatus;GO:0016023//cytoplasmic membrane-bounded vesicle;GO:0005886//plasma membrane;GO:0005802//trans-Golgi network
Unigene7854_All	867	4.8467	3.4929	3.4709	gi|297845030|ref|XP_002890396.1|	77.8	2e-13	RWP-RK domain-containing protein [Arabidopsis lyrata subsp. lyrata] >gi|297336238|gb|EFH66655.1| RWP-RK domain-containing protein [Arabidopsis lyrata subsp. lyrata]	--	--	--	--	sp|Q9LE38|NLP4_ARATH	77.4	1e-14	Protein NLP4 OS=Arabidopsis thaliana GN=NLP4 PE=2 SV=1	--	--	--	--	--	--	--	--	--	--	-	-	-
Unigene7865_All	635	3.065	5.4003	6.1536	gi|302839795|ref|XP_002951454.1|	53.9	1e-06	hypothetical protein VOLCADRAFT_101987 [Volvox carteri f. nagariensis] >gi|300263429|gb|EFJ47630.1| hypothetical protein VOLCADRAFT_101987 [Volvox carteri f. nagariensis]	--	--	--	--	sp|Q6YSF3|AN321_ORYSJ	72	3e-13	Acidic leucine-rich nuclear phosphoprotein 32-related protein 1 OS=Oryza sativa subsp. japonica GN=Os07g0607800 PE=2 SV=1	YOR054c	80.1	3e-15	COG0452	Phosphopantothenoylcysteine synthetase/decarboxylase	K11323	2e-17	87.4	vcn:VOLCADRAFT_121342	histone arginine demethylase JMJD6 [EC:1.14.11.-]	-	GO:0003676//nucleic acid binding	-
Unigene7883_All	884	9.5071	6.5492	7.1131	gi|359479031|ref|XP_002284749.2|	160.2	3e-38	PREDICTED: ethylene-responsive transcription factor RAP2-7-like [Vitis vinifera]	gi|224100868|ref|XM_002312010.1|	129	5e-27	Populus trichocarpa AP2 domain-containing transcription factor (RAP3), mRNA	sp|P47927|AP2_ARATH	120	1e-27	Floral homeotic protein APETALA 2 OS=Arabidopsis thaliana GN=AP2 PE=1 SV=1	--	--	--	--	--	K09284	4e-38	156	pop:POPTR_820288	AP2-like factor, euAP2 lineage	-	-	-
Unigene7974_All	1219	20.03	21.8107	22.4756	gi|224113193|ref|XP_002316420.1|	377.5	2e-103	predicted protein [Populus trichocarpa] >gi|222865460|gb|EEF02591.1| predicted protein [Populus trichocarpa]	gi|224097693|ref|XM_002311008.1|	61.9	1e-06	Populus trichocarpa predicted protein, mRNA	--	--	--	--	--	--	--	--	--	--	--	--	--	--	GO:0042744//hydrogen peroxide catabolic process	-	-
Unigene807_All	417	1.8033	2.5631	3.2312	--	--	--	--	gi|284055815|gb|GQ996728.1|	168	3e-39	Artemisia annua cultivar C1 more axillary branching 3 (Max3) gene, complete cds	--	--	--	--	--	--	--	--	--	--	--	--	--	--	-	-	-
Unigene8103_All	700	8.1515	8.9706	7.6354	gi|356515645|ref|XP_003526509.1|	279.3	3e-74	PREDICTED: uncharacterized protein LOC100804207 [Glycine max]	gi|356527737|ref|XM_003532417.1|	69.9	3e-09	PREDICTED: Glycine max uncharacterized protein LOC100797714 (LOC100797714), mRNA	--	--	--	--	--	--	--	--	--	--	--	--	--	--	GO:0006486//protein glycosylation	-	GO:0005773//vacuole;GO:0009506//plasmodesma;GO:0005576//extracellular region
Unigene8193_All	406	0.8716	1.5357	0.9956	gi|297745817|emb|CBI15873.3|	206.8	6e-53	unnamed protein product [Vitis vinifera]	gi|356540010|ref|XM_003538437.1|	79.8	2e-12	PREDICTED: Glycine max laccase-5-like (LOC100808948), mRNA	sp|Q9FLB5|LAC12_ARATH	198	7e-52	Laccase-12 OS=Arabidopsis thaliana GN=LAC12 PE=2 SV=1	--	--	--	--	--	K00423	4e-09	58.2	ath:AT1G55570	L-ascorbate oxidase [EC:1.10.3.3]	GO:0046688//response to copper ion;GO:0046274//lignin catabolic process;GO:0055114//oxidation-reduction process	GO:0005507//copper ion binding;GO:0052716//hydroquinone:oxygen oxidoreductase activity;GO:0008447//L-ascorbate oxidase activity	GO:0048046//apoplast
Unigene822_All	456	3.5891	4.7855	3.3489	--	--	--	--	--	--	--	--	--	--	--	--	--	--	--	--	--	--	--	--	--	--	-	-	-
Unigene8236_All	744	5.8858	4.5492	3.9843	gi|224100667|ref|XP_002311968.1|	191.8	7e-48	predicted protein [Populus trichocarpa] >gi|222851788|gb|EEE89335.1| predicted protein [Populus trichocarpa]	gi|334184728|ref|NM_129207.4|	79.8	3e-12	Arabidopsis thaliana protein ROS1 (DML1) mRNA, complete cds	sp|Q9SJQ6|ROS1_ARATH	177	5e-45	Protein ROS1 OS=Arabidopsis thaliana GN=ROS1 PE=1 SV=2	--	--	--	--	--	--	--	--	--	--	-	-	-
Unigene8296_All	610	3.1181	3.0663	2.6507	gi|297746282|emb|CBI16338.3|	80.1	2e-14	unnamed protein product [Vitis vinifera]	--	--	--	--	--	--	--	--	--	--	--	--	--	--	--	--	--	--	-	GO:0005488//binding	-
Unigene8421_All	1696	8.1632	6.9848	3.84	gi|12831474|gb|AAB05871.2|	702.6	0	PAPS-reductase-like protein [Catharanthus roseus]	gi|312283164|dbj|AK353362.1|	246	6e-62	Thellungiella halophila mRNA, complete cds, clone: RTFL01-25-E01	sp|P92980|APR3_ARATH	669	0	5'-adenylylsulfate reductase 3, chloroplastic OS=Arabidopsis thaliana GN=APR3 PE=2 SV=2	PA1756	286	6e-77	COG0175	3'-phosphoadenosine 5'-phosphosulfate sulfotransferase (PAPS reductase)/FAD synthetase and related enzymes	K05907	0	670	aly:ARALYDRAFT_911717	adenylyl-sulfate reductase (glutathione) [EC:1.8.4.9]	GO:0009684//indoleacetic acid biosynthetic process;GO:0000103//sulfate assimilation;GO:0045454//cell redox homeostasis;GO:0019419//sulfate reduction;GO:0019761//glucosinolate biosynthetic process;GO:0019344//cysteine biosynthetic process	GO:0009973//adenylyl-sulfate reductase activity;GO:0033741	GO:0009534//chloroplast thylakoid;GO:0009570//chloroplast stroma
Unigene8425_All	2188	22.3388	23.7735	19.9323	gi|359490792|ref|XP_002268036.2|	787.7	0	PREDICTED: splicing factor 3A subunit 3-like [Vitis vinifera] >gi|302144037|emb|CBI23142.3| unnamed protein product [Vitis vinifera]	gi|224034730|gb|BT069544.1|	212	1e-51	Zea mays full-length cDNA clone ZM_BFb0152L20 mRNA, complete cds	--	--	--	--	SPBC36.09	286	1e-76	COG5188	Splicing factor 3a, subunit 3	K12827	0	773	gmx:100815393	splicing factor 3A subunit 3	GO:0000085//G2 phase of mitotic cell cycle;GO:0006312//mitotic recombination;GO:0050826//response to freezing;GO:0000741//karyogamy;GO:0009793//embryo development ending in seed dormancy;GO:0006406//mRNA export from nucleus;GO:0016579//protein deubiquitination;GO:0016571//histone methylation;GO:0045694//regulation of embryo sac egg cell differentiation;GO:0010388//cullin deneddylation;GO:0009640/…	GO:0008270//zinc ion binding;GO:0003676//nucleic acid binding	GO:0005829//cytosol;GO:0005634//nucleus
Unigene8989_All	2724	15.6374	9.2208	9.4643	gi|359474639|ref|XP_002265359.2|	636	0	PREDICTED: cyclin-dependent kinase F-4-like [Vitis vinifera] >gi|296088459|emb|CBI37450.3| unnamed protein product [Vitis vinifera]	gi|359474638|ref|XM_002265323.2|	585	1e-164	PREDICTED: Vitis vinifera cyclin-dependent kinase F-4-like (LOC100245875), mRNA	sp|Q6Z8C8|CDKF4_ORYSJ	517	1e-146	Cyclin-dependent kinase F-4 OS=Oryza sativa subsp. japonica GN=CDKF-4 PE=2 SV=1	ECU02g1450	176	1e-43	COG0515	Serine/threonine protein kinase	K08829	3e-180	630	vvi:100245875	male germ cell-associated kinase [EC:2.7.11.22]	GO:0006468//protein phosphorylation;GO:0045727//positive regulation of translation;GO:0006487//protein N-linked glycosylation	GO:0008353//RNA polymerase II carboxy-terminal domain kinase activity;GO:0005524//ATP binding	GO:0005737//cytoplasm;GO:0005634//nucleus
[truncated: 5 more rows]
